# Supplementary material for: A preliminary prospective study of nutritional, psychological and combined therapies for myalgic encephalomyelitis/chronic fatigue syndrome (ME/CFS) in a private care setting
Source: PubMed Central journal article supplement — BMJ Open. 2012 Nov 19;2(6):e001079. doi: 10.1136/bmjopen-2012-001079 (PMC3533117; doi:10.1136/bmjopen-2012-001079), 2012-11-19
Supplement: bmjopen-2012-001079.draft_revisions.pdf [file bmjopen-2012-001079.draft_revisions.pdf]

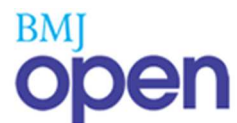

**A longitudinal observational study of patient-centered nutritional, psychological and combined therapies for Myalgic Encephalomyelitis/Chronic Fatigue Syndrome (ME/CFS).**

|                                 |                                                                                                  |
|---------------------------------|--------------------------------------------------------------------------------------------------|
| Journal:                        | <i>BMJ Open</i>                                                                                  |
| Manuscript ID:                  | bmjopen-2012-001079                                                                              |
| Article Type:                   | Research                                                                                         |
| Date Submitted by the Author:   | 27-Feb-2012                                                                                      |
| Complete List of Authors:       | Arroll, Megan; University of East London, Psychology<br>Howard, Alex; The Optimum Health Clinic, |
| <b>Primary Subject Heading</b>: | Patient-centred medicine                                                                         |
| Secondary Subject Heading:      | Complementary medicine, Nutrition and metabolism                                                 |
| Keywords:                       | COMPLEMENTARY MEDICINE, SOCIAL MEDICINE, REHABILITATION MEDICINE                                 |
|                                 |                                                                                                  |

SCHOLARONE™  
Manuscripts

## **Abstract**

Background: Myalgic Encephalomyelitis/Chronic Fatigue Syndrome (ME/CFS) is a condition characterised by severe and persistent fatigue, neurological disturbances, autonomic and endocrine dysfunctions and sleep difficulties that have a pronounced and significant impact on individuals' lives. Current NICE guidelines within the United Kingdom suggest that this condition should be treated with cognitive behavioural therapy and/or graded exercise therapy where appropriate. There is currently a lack of evidence-base concerning other, more integrative interventions that may be beneficial to those with ME/CFS.

Objectives: This study aimed to evaluate whether three patient-centered treatment modalities of psychology, nutrition and combined treatment, reduced symptomatology of ME/CFS over a 3-month time period and whether there were significant differences in these changes between groups.

Design and setting: This is a longitudinal observational study conducted at one private secondary health care facility in London, UK.

Participants: One-hundred and thirty-eight individuals (110 females, 79.7%; 42 participants in psychology, 44 in nutrition and 52 in combined) participated at baseline and 72 participants completed the battery of measures at follow-up (52.17% response rate; 14, 27, 31 participants in each group, respectively).

Outcome measures: Self-report measures of ME/CFS symptoms, functional ability, multidimensional fatigue, perceived control and maladaptive stress.

Results: Baseline comparisons showed those in the combined group had higher levels of fatigue. At follow-up, all groups saw improvements in fatigue, functional physical symptomatology and maladaptive stress; those within the psychology group also experienced a shift in perceived control over time. The psychology group demonstrated a significantly greater change in fatigue and perceived control than the combined group; however, the opposite relationship was observed for headaches.

1  
2  
3 Conclusions: Patient-centered techniques for the treatment of ME/CFS appear promising in  
4 reducing symptomatology, fatigue and inappropriate responses to stressors and increasing  
5 function and perceived control. The need for further studies of integrative treatment with  
6 robust designs appears warranted.  
7  
8  
9

## 10 11 **Summary**

### 12 **Article focus**

- 13  
14  
15 • This observational study investigated three (psychological, nutritional and combined)  
16 tailored patient-centered interventions for ME/CFS over time.  
17  
18  
19
- 20  
21 • Differences between the reported changes over time between groups were also  
22 assessed.  
23  
24

### 25 **Key messages**

- 26  
27 • Patient-centered approaches for the management of ME/CFS reduce symptomatology  
28 over time.  
29  
30
- 31  
32 • Functional ability, physical and social, increase with tailored interventions.  
33
- 34  
35 • Psychological intervention can help individuals to regain a sense of control over their  
36 condition.  
37

### 38 **Strengths and limitations of this study**

- 39  
40 • The findings here are an initial step to fill the gap in the extant literature regarding the  
41 utility of tailored, multidisciplinary and patient-centered treatments for ME/CFS.  
42  
43
- 44  
45 • There is bias in this study as the participants were self-selected in the sense that they  
46 chose to attend the clinic and which treatment option they preferred (with advice).  
47  
48  
49  
50  
51  
52  
53  
54  
55  
56  
57  
58  
59  
60

## **Introduction**

Chronic Fatigue Syndrome or myalgic encephalomyelitis (ME/CFS) is a condition characterized by prolonged and debilitating fatigue, although the exact cause of this disorder is still under debate. Due to the lack of a definitive biological marker, diagnosis is made on the basis of the exclusion of other explanatory conditions. The most widely used case definition by the Centers for Disease Control <sup>1</sup> states that there must be at least six months severe fatigue of new and definite onset, not the result of ongoing exertion, not alleviated by rest and resulting in reduced levels of physical activity. The CDC definition also sets out a series of minor complaints that must accompany the fatigue (cognitive impairment, sore throat, tender cervical or axillary lymph nodes, muscle pain, multi-joint pain, headaches of a new type, pattern or severity at onset, unrefreshing sleep and post-exertion malaise), with individuals needing to have the occurrence of four or more symptoms to be diagnosed with ME/CFS. Estimates of the prevalence of ME/CFS have been made as low as 3 and as high as 2,800 per 100,000 <sup>2</sup>.

The most widely researched strategies for alleviating the symptoms of ME/CFS are Cognitive Behavior Therapy (CBT) and Graded Exercise Therapy (GET). Two reviews of studies on CBT <sup>3 4</sup> found that it significantly improved physical functioning in adult out-patients as compared with medical management counseling, guided support, education and support or relaxation. However, the longitudinal evidence for CBT is inconsistent and there is a lack of evidence with regard to CBT in combination with other treatments <sup>4</sup>. Regarding GET, a systematic review illustrated that this form of therapy was potentially beneficial for people with ME/CFS, especially when combined with a patient education programme <sup>5</sup>. However, drop-out rates were high in the GET groups suggesting that individuals with ME/CFS are adverse to this type of therapy.

1  
2  
3  
4  
5 Although CBT and GET studies have shown some promising outcomes, there is no known  
6 cure for ME/CFS. Therefore National Institute for Health and Clinical Excellence (NICE) <sup>6</sup>  
7 recommends a number of symptom management strategies and interventions aimed at  
8 helping individuals to cope with their condition and reduce physical deconditioning brought  
9 about by the illness. Pharmacological interventions are, at times, suggested for patients with  
10 poor sleep or pain, for instance, low-dose antidepressants, as these have been shown to be  
11 effective <sup>7-13</sup>. However, patient expectations must be realistic as the drugs may help elevate  
12 mood and psychological outlook but not reduce fatigue and other symptomatology associated  
13 with ME/CFS<sup>14</sup>. Numerous drugs such as thyroxin, hydrocortisone and antiviral agents are  
14 not advised by NICE due to contradictory findings <sup>15;16</sup>.

15  
16  
17  
18  
19  
20  
21  
22  
23  
24  
25  
26  
27  
28  
29  
30 In terms of function and quality of life management, NICE offers general advice concerning  
31 sleep management, appropriate rest periods, and pacing. Sleep hygiene instruction, together  
32 with pharmacological treatment tailored to the individual patient can be beneficial in  
33 combating fatigue <sup>17</sup>. Dietary management may also reduce symptomatology for those with  
34 concurrent irritable bowel syndrome (IBS). Management approaches recommended for IBS,  
35 such as diet restriction, are thus also recommended for those with ME/CFS <sup>18</sup>. Dietary  
36 supplementation has been investigated in relation to ME/CFS. Fatty acids <sup>19</sup>, folic acid <sup>20</sup>,  
37 vitamin C <sup>21</sup>, co-enzyme Q10 <sup>22</sup>, magnesium <sup>23</sup>, multivitamins <sup>24</sup> and minerals <sup>25</sup> have all been  
38 shown to reduce symptomatology in ME/CFS patients. However other studies have shown  
39 conflicting findings with regard to nutritional supplementation, therefore it is perhaps wise to  
40 treat with supplements on a case-by-case basis <sup>26;27</sup>.

41  
42  
43  
44  
45  
46  
47  
48  
49  
50  
51  
52  
53  
54  
55  
56  
57  
58  
59  
60

1  
2  
3 Due to the lack of clear and definitive treatment strategies, individuals often seek out  
4 Complementary and Alternative Medicines (CAM). Although NICE does not propose the use  
5 of CAM they do acknowledge that many people with ME/CFS use such therapies and find  
6 them beneficial for symptom management. This view is due to the lack of published evidence  
7 for the effectiveness of these treatments. Examples of CAM treatments used by individuals  
8 with ME/CFS include religious healing, massage therapy, relaxation, meditation,  
9 homeopathy, acupuncture, naturopathy and herbal therapies<sup>28;29</sup>; patient satisfaction of such  
10 approaches CAM has been high, over 80% in some instances<sup>28</sup>. A recent systematic review  
11 of such interventions identified 70 controlled clinical trials (randomized and non-randomized)  
12 and found that 86% of these studies illustrated at least one positive effect, with 74% showing  
13 a decrease of illness-related symptomatology<sup>30</sup>. Meditative or mindfulness approaches  
14 warranted further investigation based on these results as did supplement programs of  
15 magnesium, l-carnitine, and S-adenosylmethionine. A subsequent review based solely on  
16 randomized controlled trials (RCTs) of CAM techniques identified 26 such studies and  
17 observed that qigong, massage and tuina (approaches based within Chinese Traditional  
18 Medicine and based upon relaxation and connection with the body) illustrated positive effects  
19 as did supplementation studies utilizing nicotinamide adenine dinucleotide (NADH) and  
20 magnesium<sup>31</sup>. However, within both reviews it was noted that the methodological quality of  
21 reporting was poor and the sample sizes in these studies were small; hence ability to draw  
22 strong conclusions on the efficacy of CAM methods is limited. Porter et al. (2010) did note  
23 that patient-centered, individualized treatment protocols which include a range of tailored  
24 strategies are a promising area for further investigation for this complex, multi-system illness.  
25  
26  
27  
28  
29  
30  
31  
32  
33  
34  
35  
36  
37  
38  
39  
40  
41  
42  
43  
44  
45  
46  
47  
48  
49  
50  
51  
52  
53  
54  
55  
56  
57  
58  
59  
60

## Objectives

There is still much debate and uncertainty regarding the most effective treatment for ME/CFS. Recent reviews of CAM techniques highlight the need for further exploration of patient-centered and individually tailored interventions for the alleviation of the condition's often debilitating and intrusive symptomatology. This study therefore aims to evaluate the effectiveness of three types of patient-centered approaches to the management of ME/CFS over time (baseline and follow-up) offered at a private health-care center in the UK.

## Methods

### Study design and setting

This is a longitudinal observational study which aimed to evaluate three treatment options offered to individuals with ME/CFS. The research was conducted at one private secondary health care facility. All prospective patients of the clinic are first asked to complete a comprehensive symptom profile and medical history, including questions relating to triggering factors, psychology sub-types and structural/biological sub-types (this is distinct from the research data collected). Subsequent to this, every individual receives a 15-minute screening with one of the practitioners who recommends the best course of action for his/her needs; this will be the psychology-related interventions, nutritional advice and support or a combination of the two.

All individuals requesting treatment at the private care setting were offered the opportunity to participate in the study. Those that expressed an interest were emailed a spreadsheet that contained the questionnaires and asked to complete it at their convenience. Informed consent was obtained prior to the completion of the questionnaires and the study was approved by the University of East London Ethics Committee. Participants were told that they could withdraw

1  
2  
3 from the study at any time and that withdrawal would not affect their care at the clinic.  
4  
5 Participants were able to ask questions at any point in the study and no deception was used as  
6  
7 the participants were informed of the nature of the research program before they agreed to  
8  
9 participate.  
10

### 11 12 13 14 *Psychology*

15  
16 The clinic offers a 3-month intervention which consists of a combination of Neuro-linguistic  
17  
18 Programming (NLP), Emotional Freedom Techniques (EFT), life coaching and  
19  
20 hypnotherapy/self-hypnosis constructed in a manner specific to the needs to those with  
21  
22 ME/CFS. The primary aim of this approach is to reduce the anxiety that is associated with  
23  
24 having a debilitating and unpredictable condition, improve emotional well-being and help  
25  
26 individuals slowly manage and increase their activity within their own limits (i.e. pacing).  
27  
28 The program is offered as a series of group sessions and the peer support is seen as an  
29  
30 important component of the intervention, which is solidified via the use of moderated online  
31  
32 support forums, narratives of previous client's experiences and online materials that can be  
33  
34 accessed as often as necessary. In addition, or an alternative to this course, individuals  
35  
36 receive a series of one-to-one sessions and for the most severely affected ME/CFS patients,  
37  
38 telephone sessions are arranged and support materials can be accessed in their own homes.  
39  
40  
41  
42  
43  
44

### 45 46 *Nutrition*

47  
48 Tailored nutritional therapy is achieved via one-to-one consultations with individuals. To  
49  
50 begin, a very detailed history is taken based upon the information given in the  
51  
52 aforementioned symptom profile. Qualified nutritional therapists (who have been given  
53  
54 specialist training regarding ME/CFS from the clinic) then suggest tests consistent with  
55  
56 symptomatology, for instance the Adrenal Stress Index Test, comprehensive stool  
57  
58  
59  
60



1  
2  
3 analysis/gastro-intestinal function, vitamin & mineral status, etc. Results from these tests are  
4  
5 then used to compose an evidence-driven diet and supplement program. As most cases of  
6  
7 ME/CFS are complex involving multiple body systems, this process is often iterative and  
8  
9 follow-up consultations are necessary to check progress and make alterations to the protocol.  
10  
11

### 12 13 14 *Combined*

15  
16 Within the combined program, a multidisciplinary approach is taken with practitioners  
17  
18 discussing the patients in case meetings to ensure that the psychological and nutritional  
19  
20 aspects complement each other in order to achieve the best outcome.  
21  
22

### 23 24 25 **Measures**

#### 26 27 *Medical Outcomes Survey Short-Form 36 (SF-36)*

28  
29 This 36-item measure is the short form of the original Medical Outcomes Survey <sup>32</sup> to  
30  
31 measure functional impairment and contains eight sub-sections: 1) physical activity  
32  
33 limitations due to health problems; 2) social activity limitations due to physical or emotional  
34  
35 problems; 3) usual role activity limitations due to physical health problems; 4) bodily pain; 5)  
36  
37 general mental health; 6) role activity limitations in usual due to emotional problems; 7)  
38  
39 vitality (energy and fatigue); and 8) general health perceptions <sup>32</sup>. The items are scored so that  
40  
41 higher scores indicate greater functional ability. In terms of the psychometric properties of  
42  
43 this measure, reliability estimates for all sub-scales are good, exceeding a Cronbach's alpha  
44  
45 coefficient value of 0.70 <sup>33</sup>. In terms of validity, the SF-36 correlates amply,  $r \geq 0.40$ , with the  
46  
47 frequency and severity of numerous symptoms and general health conditions <sup>34;35</sup>.  
48  
49  
50  
51  
52  
53  
54  
55  
56  
57  
58  
59  
60

### *Multidimensional Health Locus of Control Scale (MHLCS)*

Multidimensional Health Locus of Control <sup>36-38</sup> measures perceived control via three distinct sub-scales: 'internal', 'chance' and 'powerful others' which has two dimensions, that of 'doctors' and 'other people'. The instrument contains 18 items in total (six items each for the internal and chance scales and three items for both the powerful others scales) and is scored on a 6-point Likert scale from 'strongly agree' to 'strongly disagree'. Internal reliability of the instrument is good with Cronbach's alpha coefficients ranging from 0.67 for 'powerful others' to 0.77 for 'internal'. The measure correlates positively and significantly with associated scales from Levenson's <sup>39</sup> locus of control measure from which the MHLOC was based upon, which demonstrates good convergent validity <sup>36</sup>.

### *Multidimensional Fatigue Inventory (MFI)*

This 20-item measure contains five fatigue dimensions: general fatigue, physical fatigue, mental fatigue, reduced motivation and reduced activity <sup>40</sup>. Items such as 'I tire easily' are rated on a 5-point scale (1 = yes, that is true; 5 = no, that is not true) with lower scores reflecting higher levels of fatigue. The MFI has good internal consistency with average Cronbach's alpha coefficient equaling 0.84 across the sub-scales. Convergent validity based on a sample of radiotherapy patients found correlations between the sub-scales and a visual analogue fatigue scale to be 0.77 for general fatigue, 0.70 for physical fatigue, 0.61 for reduced activity, 0.56 for reduced motivation ( $p < 0.001$ ) to 0.23 for mental fatigue ( $p < 0.01$ )

<sup>40</sup>.

### *CDC CFS Symptom Inventory*

CDC CFS Symptom Inventory <sup>41</sup> was used to measure specific ME/CFS symptoms and confirm diagnosis. This instrument is based upon the CDC case definition <sup>1</sup> and includes a

1  
2  
3 fatigue item and the eight distinct symptoms are also including in the CDC guidelines and an  
4  
5 additional ten associated symptoms. The format of this self-report measure is a six-point scale  
6  
7 of perceived frequency (0 = absent, 5 = all the time) and severity (0 = none, 5 = very severe).  
8  
9 The psychometric properties of this instrument are good: Cronbach's alpha coefficient = 0.88;  
10  
11  $r = .74$  convergent validity with the Chalder Fatigue Scale <sup>42</sup>;  $r = -.68$  and  $-.87$  convergent  
12  
13 validity with the SF-36 'vitality' and 'bodily pain' sub-scales, respectively.  
14  
15

### 16 17 18 *Maladaptive Stress Index*

19  
20 This 32-item measure contains three sub-scales (cognitive/mood, sleep and ME/CFS  
21  
22 symptoms) and was designed specifically for this population <sup>43</sup>. Items such as 'I constantly  
23  
24 reply or pre-empt situations and conversations' and scored on a 5-point scale where 1 = never  
25  
26 true and 5 = always true; higher scores illustrate a greater degree of disturbance.  
27  
28  
29

### 30 31 32 **Statistical methods**

33  
34 The data was initially screened for missing data. Three cases contained substantial amounts  
35  
36 of missing data; therefore these were excluded from the analysis. Once this was done, all the  
37  
38 variables had less than 5% missing data, hence mean substitution was carried out in line with  
39  
40 guidance <sup>44</sup>. The baseline data was subsequently of the quality for parametric tests, except for  
41  
42 the variables CDC CFS swollen lymph nodes and glands, memory problems, abdominal pain  
43  
44 and depression. However, the follow-up data suffered from high levels of skew and kurtosis  
45  
46 which was not substantially alleviated by data transformation. This violated a key criterion  
47  
48 for parametric testing, that of normality of distribution, so non-parametric tests were selected.  
49  
50 In addition, as the sample sizes in each individual treatment group was small, the more  
51  
52 conservative non-parametric tests were the preferred choice as even though tests such as  
53  
54 analysis of variance are generally robust against non-normality, this does not hold true with  
55  
56  
57  
58  
59  
60

1  
2  
3 small sample sizes. For baseline data, one-way analysis of variance tests and Kruskal-Wallis  
4 tests were used to investigate difference between groups, Wilcoxon sign-rank tests were  
5 employed to look for differences over time (baseline and 3-month follow-up) and Kruskal-  
6 Wallis tests were performed to investigate group differences in measures of change as  
7 evaluated by mean change scores, with Bonferroni-corrected Mann-Whitney tests calculated  
8 to identify post-hoc differences between groups if the Kruskal-Wallis tests were significant.  
9  
10  
11  
12  
13  
14  
15  
16  
17  
18

## 19 **Results**

### 20 **Participants**

21 One-hundred and thirty-eight individuals completed the questionnaire battery at time-one  
22 (excluding the four deleted cases); 42 participants in the psychology group, 44 in the nutrition  
23 group and 52 in the combined group. There was no significant association between gender  
24 and group ( $\chi^2(2) = 0.179, p > .05$ ), all groups consisting of approximately one-fifth males  
25 (Table 1). There was not a significant difference in age ( $F(2,135) = 0.000, p > .05$ ); in fact  
26 group means for age were near identical at 42.881, 42.864 and 42.843 for psychology,  
27 nutrition and combined group, respectively. There was also a non-significant result for illness  
28 duration ( $F(2, 135) = 0.252, p > .05$ ). Therefore, in terms of demographics, the groups were  
29 comparable. With regard to the outcome measures, there were significant differences between  
30 the groups in terms of the MFI sub-scale 'general fatigue' ( $F(2, 135) = 3.219, p < .05$ ), MFI  
31 'physical fatigue' ( $F(2, 135) = 3.343, p < .05$ ) and the CDC CFS symptom 'swollen lymph  
32 nodes and glands' ( $H(2) = 7.161, p < .05$ ). To investigate the source of these differences,  
33 post-hoc tests were conducted (unrelated t-tests for the fatigue variables and Mann-Whitney  
34 tests for swollen lymph glands as the former did not meet criteria for parametric tests, all with  
35 Bonferroni correction for multiple comparisons). A significant difference was observed  
36 between the psychology and combined groups with regards to general fatigue ( $t(92) = -2.449$ ,  
37  
38  
39  
40  
41  
42  
43  
44  
45  
46  
47  
48  
49  
50  
51  
52  
53  
54  
55  
56  
57  
58  
59  
60

1  
2  
3  $p < .05$ ) and physical fatigue ( $t(92) = -2.658, p < .05$ ) and also between the nutrition and  
4  
5 psychology group in terms of the degree of lymph node and gland swelling ( $U = 635.00, p <$   
6  
7  $.05$ ). Within the fatigue measures, the combined group reported significantly higher levels of  
8  
9 both general and physical fatigued than the psychology group whereas those undertaking  
10  
11 nutritional support stated a higher occurrence swollen lymph nodes and glands.  
12  
13

### 14 15 16 *Retention analysis*

17  
18 Seventy-two of the original 138 participants completed the battery of measures at the 3-  
19  
20 month follow-up (52.17%). To investigate whether the individuals who did not complete the  
21  
22 time-two measures were significantly different from those at baseline on demographic and  
23  
24 outcome measures, a series of t-tests and Mann-Whitney tests were performed. Those that  
25  
26 dropped-out of the research (although still receiving treatment at the clinic) differed  
27  
28 significantly in terms of age ( $t(136) = -2.227, p < .05$ ) and illness duration ( $t(136) = -2.549, p$   
29  
30  $< .05$ ). Those who remained in the study were of significantly older age (mean age of those  
31  
32 that remained in the study = 45.056, SD = 11.535; mean age of drop-outs = 40.400, SD  
33  
34 =12.932) and longer illness duration than those who dropped-out (mean age of those that  
35  
36 remained in the study = 10.836, SD = 7.383; mean illness duration of drop-outs =7.571, SD =  
37  
38 7.472). Individuals who did not remain in the study did not differ significantly in terms of  
39  
40 gender ( $\chi^2 (2) = 1.222, p > .05$ ) or any of the outcome measures.  
41  
42  
43  
44  
45  
46

### 47 **Longitudinal data**

48  
49 In the sample as a whole, there were significant differences from baseline to follow-up within  
50  
51 the internal and doctors sub-scale of the MHLCS and all the CDC CFS Symptom Inventory  
52  
53 items bar swollen lymph nodes and glands, fever and abdominal pain. There were also  
54  
55 significant differences in all areas of the SF-36, all the fatigue sub-scales of the MFI with the  
56  
57  
58  
59  
60

1  
2  
3 five sub-scales illustrating significant reductions in fatigue and, finally, reductions were also  
4  
5 observed in the Maladaptive Stress Response.  
6  
7

8  
9  
10 Within the psychology group significant differences were also found in the SF-36 sub-scales  
11  
12 'physical functioning', 'role limitations due to physical problem', 'social functioning',  
13  
14 'general mental health', 'vitality, energy or fatigue' and 'general health perceptions'.  
15  
16 Regarding perceived control, significant differences were found in internal locus of control  
17  
18 and the perception that chance played an influential part in the individuals' lives. Again, all  
19  
20 the MFI fatigue scales saw significant decreases over a 3-month period. Regarding ME/CFS  
21  
22 specific symptoms, ratings of muscle aches or muscle pains, chills, memory problems,  
23  
24 difficulty concentrating and sensitivity to light differed significantly from baseline to follow-  
25  
26 up in the expected direction. There was also a significant reduction in the Maladaptive Stress  
27  
28 Response over time.  
29  
30  
31  
32  
33

34 The nutrition group saw significant improvements in role limitations due to physical  
35  
36 problems, social functioning, vitality, energy or fatigue and general health perceptions. No  
37  
38 significant differences were found from baseline to follow-up in perceived control in the  
39  
40 nutrition group. Once again, all the MFI fatigue scales decreased over a 3-month period and  
41  
42 numerous symptom-related indices also showed improvements; sore throat, swollen lymph  
43  
44 glands, fatigue after exertion, muscle aches or muscle pains, pain in joints, chills, headaches,  
45  
46 abdominal pain and sensitivity to light. The way in which the individuals in this group  
47  
48 responded to stress also decreased over the 3-month time period.  
49  
50  
51  
52  
53

54 In terms of general health as evaluated by the SF-36 measure, the group who received both  
55  
56 psychological and nutritional intervention reported reductions in role limitations due to  
57  
58  
59  
60

1  
2  
3 physical difficulties, social functioning, role limitations due to emotional difficulties and  
4  
5 general health perceptions. No significant differences were found from baseline to follow-up  
6  
7 in perceived control as measured by the MHLCS in the combined treatment group. Only one  
8  
9 measure of fatigue, that of physical fatigue, saw significant improvements over time.  
10  
11 Diarrhea, fatigue after exertion, chills, headaches and sinus and nasal symptoms all illustrated  
12  
13 significant reductions over the 3-month interval, as did the Maladaptive Stress Response.  
14  
15 (See Table 2 for descriptive and inferential statistics associated with these findings and Table  
16  
17 3 for percentage of change over time.)  
18  
19

### 20 21 22 23 **Comparisons across groups**

24  
25 As shown in Table 3, three of the outcome measures differed significantly in terms of change  
26  
27 from baseline to follow up, namely the MHLCS 'chance' sub-scale ( $H(2) = 7.674, p < .05$ ),  
28  
29 the MFI 'general fatigue' sub-scale ( $H(2) = 6.790, p < .05$ ) and the CDC CFS symptom  
30  
31 'headaches' ( $H(2) = 6.625, p < .05$ ). In terms of perceived control and general fatigue, the  
32  
33 psychology group differed significantly as compared to the combined group ( $U = 110.500, p$   
34  
35  $< .05$ ) and ( $U = 118.000, p < .05$ ), respectively, with the psychology group seeing a greater  
36  
37 change over time as compared to the combined group on both measures. Regarding  
38  
39 headaches, the combined group ( $U = 118.000, p < .05$ ) improved significantly more than the  
40  
41 psychology group. No other comparisons reached statistical significance with a Bonferroni  
42  
43 correction for multiple comparisons.  
44  
45  
46  
47  
48

### 49 **Discussion**

#### 50 **Key results**

51  
52 There was significant change over time of numerous measures in all groups investigated. The  
53  
54 psychology group contained the most significant findings, including those concerned with  
55  
56  
57  
58  
59  
60

1  
2  
3 daily functioning, fatigue, locus of control, the cognitive CDC CFS specific symptoms and  
4  
5 the Maladaptive Stress Response. As expected, changes in perceived control were not  
6  
7 observed in the nutrition group as this is not an area that is targeted in this program.  
8  
9  
10 However, the more immune-type symptoms such as sore throat, swollen lymph nodes or  
11  
12 glands and pain in joints did see significant reductions over time as would be envisaged in  
13  
14 treatment protocols based upon nutritional expertise. The group that exhibited the least  
15  
16 significant findings was the combined group and, as noted below, this may be due to the  
17  
18 greater general severity in this group and the need for a more lengthy intervention.  
19  
20 Nevertheless, considering the small sample sizes in the groups at follow-up, these results are  
21  
22 very promising and warrant further attention. In terms of these preliminary findings, the  
23  
24 psychology group performed better with regard to lowering the belief that chance influences  
25  
26 the course of the condition. This is an important observation as the unpredictable nature of  
27  
28 ME/CFS can be one of the most difficult components for individuals to cope with <sup>45</sup> and  
29  
30 helping patients gain an improved sense of control over the illness is of great potential  
31  
32 benefit. The psychology group also demonstrated a significantly greater change score in  
33  
34 general fatigue as compared with the combined group which may infer that in the short term,  
35  
36 guiding individuals through the complex nature of the disorder, helping them to understand it  
37  
38 and accept that the condition itself gives rise to stresses and psychological distress may be a  
39  
40 good starting point for intervention (i.e. a stepped program could be developed).  
41  
42  
43  
44  
45  
46

### 47 **Interpretation**

48  
49 As noted previously <sup>30</sup> patient-centered, individualized treatment protocols which include a  
50  
51 range of tailored strategies is a favorable direction for dealing with a complex and multi-  
52  
53 system disorder such as ME/CFS. The present study has demonstrated that such interventions  
54  
55 are useful in lowering symptomatology, improving functioning and helping individuals gain a  
56  
57  
58  
59  
60



1  
2  
3 greater sense of control over their health status. Considering that the options available on the  
4 National Health Service, mainly CBT and GET, are often perceived as coping strategies at  
5 best, and physically damaging at worst <sup>46</sup>, tailored treatments such as described here may be  
6 more palatable, and hence effective.  
7  
8  
9  
10

### 11 12 13 14 **Limitations and Generalisability**

15  
16 This study did not have a control group so the results should be treated with caution. Also,  
17 the participants were not randomly assigned to groups as this was a naturalistic, observational  
18 study. Each individual was guided to appropriate treatment within an initial screening with  
19 clinic staff, therefore the group was dependent on the nature of the individual's symptoms  
20 and their personal choice as the programs on offer were privately funded. However, as can be  
21 seen in the baseline comparisons, the groups did not differ in terms of gender, age, illness  
22 duration or the majority of outcome measures. Notably, the groups did differ in general and  
23 physical fatigue with participants in the combined groups reporting greater fatigue than those  
24 in the psychology group which suggests that this group's general symptomatology was more  
25 severe. The combined group illustrated less improvement over time compared to the  
26 psychology and nutrition groups and it is feasible to infer that individuals with a greater  
27 number and degree of complaints are referred to the combined group within the clinic. Also,  
28 it should be noted that the interventions in the combined program are phased in as it was  
29 found that asking individuals to engage in numerous therapeutic activities resulted in high  
30 drop-out rates. Therefore, changes in outcome measures may not be noted at an interval of  
31 three months for that group. Further studies underway presently will investigate follow-ups at  
32 6- and 12-months to identify whether the findings here are maintained over time and also  
33 whether those with greater severity benefit with a longer intervention. As the participants  
34 were self-selected onto these programs, the findings lack generalizability; future work should  
35  
36  
37  
38  
39  
40  
41  
42  
43  
44  
45  
46  
47  
48  
49  
50  
51  
52  
53  
54  
55  
56  
57  
58  
59  
60

1  
2  
3 sample from the overall ME/CFS population and be randomly-assigned to groups in order to  
4  
5 make valid assumptions regarding the illness-group as a whole.  
6  
7  
8

### 9 10 **Funding**

11 No external funding was obtained for this research; the work was accomplished in-house at  
12  
13 the clinic in question.  
14  
15  
16  
17  
18  
19

### 20 21 **Data Sharing**

22 Dataset available from the corresponding author at m.a.arroll@sa.uel.ac.uk. Consent was not  
23  
24 obtained for data sharing but the presented data are anonymised and risk of identification is  
25  
26 low.  
27  
28  
29  
30  
31

### 32 33 **Contributorship**

34  
35  
36 Alex Howard made a substantial contributions to conception and design and acquisition of  
37  
38 data, whilst Megan Arroll made a substantial contribution to the analysis and interpretation of  
39  
40 data. Both authors made a substantial  
41  
42 contribution to the drafting of the article and revisions for the critically of important  
43  
44 intellectual content. Final approval of the version to be published was also granted by both  
45  
46 authors.  
47  
48  
49  
50  
51

### 52 53 **Competing Interests**

54 None  
55  
56  
57  
58  
59  
60

1  
2  
3 List of abbreviations  
4

5 ME: myalgic encephalomyelitis  
6

7 CFS: Chronic Fatigue Syndrome  
8

9 NICE: National Institute for Health and Clinical Excellence  
10

11 CBT: Cognitive Behavioral Therapy  
12

13 GET: Graded Exercise Therapy  
14

15 CAM: Complementary and Alternative Medicine  
16

17 NLP: Neuro-linguistic Programming  
18

19 EFT: Emotional Freedom Technique  
20

21 SF-36: Medical Outcomes Survey Short-Form 36  
22

23 MHLCS: Multidimensional Health Locus of Control Scale  
24

25 MFI: Multidimensional Fatigue Inventory  
26  
27

28  
29  
30 Reference List  
31

32  
33  
34 (1) Fukuda K, Straus SE, Hickie I, Sharpe MC, Dobbins JG, Komaroff A. The chronic  
35 fatigue syndrome: A comprehensive approach to its definition and study. *Annals of Internal*  
36 *Medicine* 1994; 121:953-959.  
37

38 (2) Jason LAE, Fennell PAE, Taylor RRE. Handbook of chronic fatigue syndrome. 2003.  
39

40 (3) Price JR, Couper J. Cognitive behaviour therapy for chronic fatigue syndrome in  
41 adults. *The Cochrane Database of Systematic Reviews* 1998; 4:1-38.  
42

43 (4) Price JR, Mitchell E, Tidy E, Hunot V. Cognitive behaviour therapy for chronic  
44 fatigue syndrome in adults. *Cochrane Database of Systematic Reviews* 2008;(Issue 3).  
45

46 (5) Edmonds M, McGuire H, Price J. Exercise therapy for chronic fatigue syndrome. *The*  
47 *Cochrane Database of Systematic Reviews* 2004; 3:1-25.  
48

49 (6) National Institute for Health and Clinical Excellence. Chronic fatigue  
50 syndrome/myalgic encephalomyelitis (or encephalopathy): Diagnosis and management of  
51 CFS/ME in adults and children. London: NICE; 2007.  
52

53 (7) Wearden AJ, Morriss RK, Mullis R, Strickland PL, Pearson DJ, Appleby L et al.  
54 Randomised, double-blind, placebo-controlled treatment trial of fluoxetine and graded  
55 exercise for chronic fatigue syndrome. *British Journal of Psychiatry* 1998; 172(6):485-490.  
56  
57  
58  
59  
60

- 1  
2  
3 (8) Vercoulen JH, Swanink CM, Zitman FG, Vreden SG, Hoofs MP, Fennis JF et al.  
4 Randomised, double-blind, placebo-controlled study of fluoxetine in chronic fatigue  
5 syndrome. *Lancet* 1996; 347(9005):858-861.  
6
- 7 (9) Goodnick PJ, Jorge CM. Treatment of chronic fatigue syndrome with nefazodone.  
8 *American Journal of Psychiatry* 1999; 156(5):797-798.  
9
- 10 (10) Goodnick PJ. Treatment of chronic fatigue syndrome with venlafaxine. *American*  
11 *Journal of Psychiatry* 1996; 153(2):294.  
12
- 13 (11) Goodnick PJ, Sandoval R. Psychotropic treatment of chronic fatigue syndrome and  
14 related disorders. *Journal of Clinical Psychiatry* 1993; 54(1):13-20.  
15
- 16 (12) Goodnick PJ, Sandoval R, Brickman A, Klimas NG. Bupropion treatment of  
17 fluoxetine-resistant chronic fatigue syndrome. *Biological Psychiatry* 1992; 32(9):834-838.  
18
- 19 (13) Hickie I. Nefazodone for patients with chronic fatigue syndrome. *Australian and New*  
20 *Zealand Journal of Psychiatry* 1999; 33(2):278-280.  
21
- 22 (14) Levine P, Schwartz S, Furst G. Medical intervention and management. 2003.  
23
- 24 (15) Afari N, Buchwald D. Chronic fatigue syndrome: A review. *American Journal of*  
25 *Psychiatry* 2003; 160(2):221-236.  
26
- 27 (16) Reid S, Chalder T, Cleare A, Hotopf M, Wessely S. Extracts from "Clinical  
28 Evidence": Chronic fatigue syndrome. *British Medical Journal* 2000; 320:292-296.  
29
- 30 (17) Lange G, Cook DB, Natelson BH. Rehabilitation and Treatment of Fatigue. 2005.  
31
- 32 (18) Jones J, Boorman J, Cann P, Forbes S, Gomborne J, Heaton K et al. British Society of  
33 Gastroenterology guidelines for the management of the irritable bowel syndrome. *Gut* 2000;  
34 47((Suppl II)):ii1-ii19.  
35
- 36 (19) Warren G, McKendrick M, Peet M. The role of essential fatty acids in chronic fatigue  
37 syndrome: A case-controlled study of red-cell membrane essential fatty acids (EFA) and a  
38 placebo-controlled treatment study with high dose of EFA. *Acta Neurologica Scandinavica*  
39 1999; 99(2):112-116.  
40
- 41 (20) Kaslow JE, Rucker L, Onishi R. Liver extract-folic acid-cyanocobalamin vs placebo  
42 for chronic fatigue syndrome. *Archives of Internal Medicine* 1989; 149(11):2501-2503.  
43
- 44 (21) Kodama M, Kodama T, Murakami M. The value of the dehydroepiandrosterone-  
45 annexed vitamin C infusion treatment in the clinical control of chronic fatigue syndrome  
46 (CFS). II. Characterization of CFS patients with special reference to their response to a new  
47 vitamin C infusion treatment. *In Vivo* 1996; 10:585-596.  
48
- 49 (22) Langsjoen PH, Folkers K. Isolated diastolic dysfunction of the myocardium and its  
50 response to CoQ10 treatment. *The Clinical Investigator* 1993; 71:S140-144.  
51
- 52 (23) Cox IM, Campbell MJ, Dowson D. Red blood cell magnesium and chronic fatigue  
53 syndrome. *Lancet* 1991; 337:757-760.  
54  
55  
56  
57  
58  
59  
60

- 1  
2  
3 (24) Bentler SE, Hartz AJ, Kuhn EM. Prospective Observational Study of Treatments for  
4 Unexplained Chronic Fatigue. *Journal of Clinical Psychiatry* 2005; 66(5):May-632.  
5  
6 (25) Martin RWY, Ogston SA, Evans JR. Effects of Vitamin and Mineral Supplementation  
7 on Symptoms Associated with Chronic Fatigue Syndrome with Coxsackie B Antibodies.  
8 *Journal of Nutritional & Environmental Medicine* 2008; 4:11-23.  
9  
10 (26) Wiebe E. N of 1 trails. Managing patients with chronic fatigue syndrome: two case  
11 reports. *Canadian Family Physician* 1996; 42:2214-2217.  
12  
13 (27) Brouwers FM, Van Der Werf S, Bleijenberg G, Van Der Zee L, Van Der Meer J-WM.  
14 The effect of a polynutrient supplement on fatigue and physical activity of patients with  
15 chronic fatigue syndrome: A double-blind randomized controlled trial. *QJM: Monthly*  
16 *Journal of the Association of Physicians* 2002; 95(10):677-683.  
17  
18 (28) Afari N, Eisenberg DM, Herrell R, Goldberg J, Kleyman E, Ashton S et al. Use of  
19 alternative treatments by chronic fatigue syndrome discordant twins. *Integrative Medicine*  
20 2000; 2:97-103.  
21  
22 (29) Buchwald D, Garrity D. Comparison of patients with chronic fatigue syndrome,  
23 fibromyalgia, and multiple chemical sensitivities. *Archives of Internal Medicine* 1994;  
24 154(18):2049-2053.  
25  
26 (30) Porter NA, Jason LA, Boulton A, Bothne N, Coleman B. Alternative medical  
27 interventions used in the treatment and management of myalgic encephalomyelitis/chronic  
28 fatigue syndrome and fibromyalgia. *Journal of Alternative and Complementary Medicine*  
29 2010; 16(3):235-249.  
30  
31 (31) Alraek T, Lee MS, Choi TY, Cao H, Liu J. Complementary and alternative medicine  
32 for patients with chronic fatigue syndrome: A systematic review. *BMC Complementary and*  
33 *Alternative Medicine* 2010; 11(87):<http://www.biomedcentral.com/1472-6882/11/87>.  
34  
35 (32) Ware JE, Sherbourne CD. The MOS 36-Item Short-Form Health Survey (SF-36).  
36 *Medical Care* 1992; 30:473-481.  
37  
38 (33) Tsai C, Bayliss MS, Ware JE. Health Survey Annotated Bibliography: Second Edition  
39 (1988-1996). Boston, MA: Health Assessment Lab, New England Medical Center; 1997.  
40  
41 (34) Ware JE, Kosinski M, Keller SK. SF-36® Physical and Mental Health Summary  
42 Scales: A User's Manual. Boston, MA: New England Medical Center, The Health Institute;  
43 1994.  
44  
45 (35) Ware JE, Snow KK, Kosinski M, Gandek B. SF-36® Health Survey Manual and  
46 Interpretation Guide. Boston, MA: New England Medical Center, The Health Institute; 1993.  
47  
48 (36) Wallston KA, Wallston BS, DeVellis R. Development of the Multidimensional Health  
49 Locus of Control (MHLC) Scales. *Health Education Monograph* 1978; 6(2):160-170.  
50  
51 (37) Wallston KA, Stein MJ, Smith CA. Form C of the MHLC Scales: A condition-  
52 specific measure of locus of control. *Journal of Personality Assessment* 1994; 63:534-553.  
53  
54  
55  
56  
57  
58  
59  
60

1  
2  
3 (38) Wallston KA, Wallston BS. Health locus of control scales. In: Lefcourt H, editor.  
4 Advances and innovations in locus of control research. New York: Academic Press; 1980.

5  
6 (39) Levenson H. Multidimensional locus of control in psychiatric patients. *Journal of*  
7 *Consulting and Clinical Psychology* 1973; 41(3):397-404.

8  
9 (40) Smets E-MA, Garssen B, Bonke B, de Haes J-CJM. The Multidimensional Fatigue  
10 Inventory (MFI) psychometric qualities of an instrument to assess fatigue. *Journal of*  
11 *Psychosomatic Research* 1995; 39(3):315-325.

12  
13 (41) Wagner D, Nisenbaum R, Heim C, Jones JF, Unger ER, Reeves WC. Psychometric  
14 properties of the CDC Symptom Inventory for assessment of Chronic Fatigue Syndrome.  
15 *Population Health Metrics* 2005; 3(8).

16  
17 (42) Chalder T, Berelozit G, Pawlikowska T, Watts L, Wessely S, Wright D et al.  
18 Development of a fatigue scale. *Journal of Psychosomatic Research* 1993; 37:147-153.

19  
20 (43) Arroll MA, Howard A. The development of the Maladaptive Stress Index. 2012; in  
21 prep.

22  
23 (44) Tabachnick BG, Fidell LS. Using multivariate statistics. 4th ed. Needham Heights,  
24 MA: Allyn & Bacon; 2001.

25  
26 (45) Arroll MA, Senior V. Individuals' Experience of Chronic Fatigue Syndrome/ Myalgic  
27 Encephalomyelitis: An Interpretative Phenomenological Analysis. *Psychology and Health*  
28 2008; 23:443-458.

29  
30 (46) Kindon T. Reporting of Harms Associated with Graded Exercise Therapy and  
31 Cognitive Behavioural Therapy in Myalgic Encephalomyelitis/Chronic Fatigue Syndrome.  
32 *Bulletin of the International Association of CFS/ME* 2011; 19(2):59-111.

**Table 1. Baseline comparisons of sample demographics and outcome variables**

|                                    |            | Mean                    | SD     | 95% CI for Mean |        | Test statistic     | p-value |
|------------------------------------|------------|-------------------------|--------|-----------------|--------|--------------------|---------|
|                                    |            |                         |        | Lower           | Upper  |                    |         |
| Gender                             | Psychology | 9 (21.4%) <sup>d</sup>  |        |                 |        | .179 <sup>c</sup>  | .915    |
|                                    | Nutrition  | 8 (18.2%) <sup>d</sup>  |        |                 |        |                    |         |
|                                    | Combined   | 11 (21.2%) <sup>d</sup> |        |                 |        |                    |         |
|                                    | Total      | 28 (20.3%) <sup>d</sup> |        |                 |        |                    |         |
| Age                                | Psychology | 42.881                  | 13.986 | 38.523          | 47.239 | .000 <sup>a</sup>  | 1.000   |
|                                    | Nutrition  | 42.864                  | 12.504 | 39.062          | 46.665 |                    |         |
|                                    | Combined   | 42.843                  | 11.125 | 39.714          | 45.972 |                    |         |
|                                    | Total      | 42.861                  | 12.406 | 40.765          | 44.957 |                    |         |
| Illness duration                   | Psychology | 8.874                   | 8.252  | 6.302           | 11.445 | .252 <sup>a</sup>  | .778    |
|                                    | Nutrition  | 10.023                  | 7.375  | 7.781           | 12.265 |                    |         |
|                                    | Combined   | 9.625                   | 7.291  | 7.595           | 11.655 |                    |         |
|                                    | Total      | 9.523                   | 7.580  | 8.247           | 10.800 |                    |         |
| SF-36<br>Physical Functioning      | Psychology | 49.339                  | 22.698 | 42.266          | 56.413 | .319 <sup>a</sup>  | .727    |
|                                    | Nutrition  | 47.855                  | 26.226 | 39.882          | 55.829 |                    |         |
|                                    | Combined   | 45.299                  | 25.479 | 38.206          | 52.393 |                    |         |
|                                    | Total      | 47.344                  | 24.792 | 43.171          | 51.517 |                    |         |
| SF-36<br>Role limitations physical | Psychology | 7.143                   | 15.894 | 2.190           | 12.096 | .281 <sup>a</sup>  | .755    |
|                                    | Nutrition  | 7.574                   | 17.500 | 2.254           | 12.895 |                    |         |
|                                    | Combined   | 9.774                   | 21.051 | 3.914           | 15.635 |                    |         |
|                                    | Total      | 8.272                   | 18.387 | 5.177           | 11.367 |                    |         |
| SF-36                              | Psychology | 61.548                  | 25.614 | 53.566          | 69.530 | 1.002 <sup>a</sup> | .370    |

|                            |            |        |         |        |        |                    |      |
|----------------------------|------------|--------|---------|--------|--------|--------------------|------|
| Bodily pain                | Nutrition  | 55.625 | 30.242  | 46.431 | 64.819 |                    |      |
|                            | Combined   | 53.606 | 27.019  | 46.084 | 61.128 |                    |      |
|                            | Total      | 56.667 | 27.683  | 52.007 | 61.327 |                    |      |
| SF-36                      | Psychology | 37.202 | 21.824  | 30.402 | 44.003 | .536 <sup>a</sup>  | .586 |
| Social functioning         | Nutrition  | 32.671 | 25.888  | 24.800 | 40.541 |                    |      |
|                            | Combined   | 32.452 | 24.786  | 25.552 | 39.352 |                    |      |
|                            | Total      | 33.967 | 24.212  | 29.892 | 38.043 |                    |      |
| SF-36                      | Psychology | 60.286 | 19.584  | 54.183 | 66.389 | .124 <sup>a</sup>  | .884 |
| General mental health      | Nutrition  | 59.727 | 19.355  | 53.843 | 65.612 |                    |      |
|                            | Combined   | 58.308 | 20.948  | 52.476 | 64.140 |                    |      |
|                            | Total      | 59.362 | 19.911  | 56.011 | 62.714 |                    |      |
| SF-36                      | Psychology | 55.554 | 46.368  | 41.104 | 70.004 | .390 <sup>a</sup>  | .678 |
| Role limitations emotional | Nutrition  | 48.482 | 47.390  | 34.074 | 62.890 |                    |      |
|                            | Combined   | 47.780 | 43.924  | 35.551 | 60.008 |                    |      |
|                            | Total      | 50.370 | 45.590  | 42.695 | 58.044 |                    |      |
| SF-36                      | Psychology | 20.714 | 16.1386 | 15.685 | 25.743 | .129 <sup>a</sup>  | .879 |
| Vitality Energy or Fatigue | Nutrition  | 20.114 | 14.570  | 15.685 | 24.542 |                    |      |
|                            | Combined   | 19.039 | 17.658  | 14.123 | 23.955 |                    |      |
|                            | Total      | 19.891 | 16.159  | 17.171 | 22.611 |                    |      |
| SF-36                      | Psychology | 37.024 | 17.945  | 31.432 | 42.616 | 2.769 <sup>a</sup> | .066 |
| General health perceptions | Nutrition  | 28.636 | 15.528  | 23.915 | 33.357 |                    |      |
|                            | Combined   | 30.962 | 17.575  | 26.069 | 35.854 |                    |      |
|                            | Total      | 32.065 | 17.286  | 29.156 | 34.975 |                    |      |
| MHLCS Internal             | Psychology | .677   | .159    | .627   | .726   | 1.216 <sup>a</sup> | .300 |
|                            | Nutrition  | .622   | .177    | .568   | .675   |                    |      |



|                         |            |        |       |        |        |                    |       |
|-------------------------|------------|--------|-------|--------|--------|--------------------|-------|
|                         | Combined   | .662   | .174  | .613   | .710   |                    |       |
|                         | Total      | .653   | .171  | .625   | .682   |                    |       |
| MHLCS Chance            | Psychology | .368   | .156  | .320   | .417   | .395 <sup>a</sup>  | .674  |
|                         | Nutrition  | .340   | .133  | .299   | .380   |                    |       |
|                         | Combined   | .354   | .155  | .311   | .397   |                    |       |
|                         | Total      | .354   | .148  | .329   | .379   |                    |       |
| MHLCS Powerful Others   | Psychology | .404   | .134  | .362   | .446   | .119 <sup>a</sup>  | .888  |
|                         | Nutrition  | .417   | .141  | .374   | .460   |                    |       |
|                         | Combined   | .407   | .101  | .379   | .436   |                    |       |
|                         | Total      | .409   | .124  | .388   | .430   |                    |       |
| MHLCS Doctors           | Psychology | .169   | .082  | .143   | .194   | .575 <sup>a</sup>  | .564  |
|                         | Nutrition  | .171   | .089  | .144   | .197   |                    |       |
|                         | Combined   | .191   | .147  | .150   | .232   |                    |       |
|                         | Total      | .178   | .112  | .159   | .196   |                    |       |
| MHLCS<br>Other People   | Psychology | .235   | .075  | .212   | .259   | 1.051 <sup>a</sup> | .352  |
|                         | Nutrition  | .264   | .129  | .225   | .304   |                    |       |
|                         | Combined   | .245   | .074  | .224   | .265   |                    |       |
|                         | Total      | .248   | .095  | .232   | .264   |                    |       |
| MFI<br>General Fatigue  | Psychology | 15.952 | 2.845 | 15.066 | 16.839 | 3.219 <sup>a</sup> | .043* |
|                         | Nutrition  | 16.977 | 2.601 | 16.186 | 17.768 |                    |       |
|                         | Combined   | 17.327 | 2.587 | 16.607 | 18.047 |                    |       |
|                         | Total      | 16.797 | 2.716 | 16.340 | 17.254 |                    |       |
| MFI<br>Physical Fatigue | Psychology | 15.929 | 3.331 | 14.891 | 16.966 | 3.343 <sup>a</sup> | .038* |
|                         | Nutrition  | 16.727 | 3.358 | 15.707 | 17.748 |                    |       |
|                         | Combined   | 17.615 | 2.823 | 16.830 | 18.401 |                    |       |

1  
2  
3  
4  
5  
6  
7  
8  
9  
10  
11  
12  
13  
14  
15  
16  
17  
18  
19  
20  
21  
22  
23  
24  
25  
26  
27  
28  
29  
30  
31  
32  
33  
34  
35  
36  
37  
38  
39  
40  
41  
42  
43  
44  
45  
46  
47  
48  
49

|                                    |            |        |       |        |        |                    |       |
|------------------------------------|------------|--------|-------|--------|--------|--------------------|-------|
|                                    | Total      | 16.819 | 3.211 | 16.278 | 17.359 |                    |       |
| MFI                                | Psychology | 13.857 | 4.112 | 12.576 | 15.138 | 1.030 <sup>a</sup> | .360  |
| Reduced Activity                   | Nutrition  | 14.136 | 4.027 | 12.912 | 15.361 |                    |       |
|                                    | Combined   | 14.962 | 3.662 | 13.942 | 15.981 |                    |       |
|                                    | Total      | 14.362 | 3.921 | 13.702 | 15.022 |                    |       |
| MFI                                | Psychology | 10.357 | 4.287 | 9.021  | 11.693 | 1.324 <sup>a</sup> | .270  |
| Reduced Motivation                 | Nutrition  | 10.500 | 3.474 | 9.444  | 11.556 |                    |       |
|                                    | Combined   | 11.462 | 3.153 | 10.584 | 12.339 |                    |       |
|                                    | Total      | 10.819 | 3.639 | 10.206 | 11.431 |                    |       |
| MFI                                | Psychology | 13.524 | 4.363 | 12.164 | 14.883 | .064 <sup>a</sup>  | .938  |
| Mental Fatigue                     | Nutrition  | 13.682 | 4.328 | 12.366 | 14.998 |                    |       |
|                                    | Combined   | 13.846 | 4.345 | 12.637 | 15.056 |                    |       |
|                                    | Total      | 13.696 | 4.315 | 12.969 | 14.422 |                    |       |
| CDC CFS                            | Psychology | 2.571  | 3.109 | 1.603  | 3.540  | 1.414 <sup>a</sup> | .247  |
| Sore Throat                        | Nutrition  | 3.977  | 3.776 | 2.829  | 5.125  |                    |       |
|                                    | Combined   | 3.202  | 4.494 | 1.951  | 4.454  |                    |       |
|                                    | Total      | 3.257  | 3.898 | 2.601  | 3.914  |                    |       |
| CDC CFS Swollen Lymph nodes Glands | Psychology | 1.976  | 3.382 | .922   | 3.030  | 7.161 <sup>b</sup> | .028* |
|                                    | Nutrition  | 5.561  | 6.491 | 3.587  | 7.534  |                    |       |
|                                    | Combined   | 3.462  | 4.881 | 2.103  | 4.820  |                    |       |
|                                    | Total      | 3.679  | 5.250 | 2.795  | 4.563  |                    |       |
| CDC CFS Diarrhoea                  | Psychology | 2.071  | 3.249 | 1.059  | 3.084  | .850 <sup>a</sup>  | .430  |
|                                    | Nutrition  | 2.841  | 4.832 | 1.372  | 4.310  |                    |       |
|                                    | Combined   | 3.135  | 3.773 | 2.084  | 4.185  |                    |       |
|                                    | Total      | 2.717  | 3.998 | 2.044  | 3.390  |                    |       |

|                                      |            |        |       |        |        |                    |      |
|--------------------------------------|------------|--------|-------|--------|--------|--------------------|------|
| CDC CFS Fatigue after exertion       | Psychology | 13.286 | 6.271 | 11.331 | 15.240 | .219 <sup>a</sup>  | .803 |
|                                      | Nutrition  | 13.722 | 6.450 | 11.761 | 15.682 |                    |      |
|                                      | Combined   | 14.154 | 6.270 | 12.408 | 15.899 |                    |      |
|                                      | Total      | 13.752 | 6.292 | 12.693 | 14.811 |                    |      |
| CDC CFS Muscle Aches or Muscle Pains | Psychology | 8.286  | 6.747 | 6.183  | 10.388 | .166 <sup>a</sup>  | .847 |
|                                      | Nutrition  | 9.091  | 6.383 | 7.151  | 11.031 |                    |      |
|                                      | Combined   | 8.519  | 6.932 | 6.589  | 10.449 |                    |      |
|                                      | Total      | 8.630  | 6.664 | 7.509  | 9.752  |                    |      |
| CDC CFS Pain In Joints               | Psychology | 3.476  | 5.334 | 1.814  | 5.138  | 1.373 <sup>a</sup> | .257 |
|                                      | Nutrition  | 4.696  | 5.560 | 3.006  | 6.386  |                    |      |
|                                      | Combined   | 5.474  | 6.386 | 3.696  | 7.251  |                    |      |
|                                      | Total      | 4.618  | 5.837 | 3.635  | 5.600  |                    |      |
| CDC CFS Fever                        | Psychology | 1.238  | 2.516 | .454   | 2.022  | .027 <sup>a</sup>  | .973 |
|                                      | Nutrition  | 1.394  | 2.562 | .615   | 2.173  |                    |      |
|                                      | Combined   | 1.333  | 3.909 | .245   | 2.421  |                    |      |
|                                      | Total      | 1.324  | 3.106 | .801   | 1.846  |                    |      |
| CDC CFS Chills                       | Psychology | 3.357  | 4.637 | 1.912  | 4.802  | .206 <sup>a</sup>  | .814 |
|                                      | Nutrition  | 3.750  | 3.924 | 2.557  | 4.943  |                    |      |
|                                      | Combined   | 3.192  | 4.343 | 1.983  | 4.402  |                    |      |
|                                      | Total      | 3.420  | 4.283 | 2.699  | 4.141  |                    |      |
| CDC CFS Unrefreshing Sleep           | Psychology | 12.905 | 6.792 | 10.788 | 15.021 | .150 <sup>a</sup>  | .861 |
|                                      | Nutrition  | 12.250 | 7.088 | 10.095 | 14.405 |                    |      |
|                                      | Combined   | 12.154 | 7.147 | 10.164 | 14.144 |                    |      |
|                                      | Total      | 12.413 | 6.978 | 11.238 | 13.588 |                    |      |
| CDC CFS Sleeping                     | Psychology | 9.286  | 7.658 | 6.899  | 11.672 | .085 <sup>a</sup>  | .918 |

|                                  |            |       |       |        |        |                    |      |
|----------------------------------|------------|-------|-------|--------|--------|--------------------|------|
| Problems                         | Nutrition  | 8.614 | 7.317 | 6.389  | 10.838 |                    |      |
|                                  | Combined   | 8.904 | 7.684 | 6.766  | 11.042 |                    |      |
|                                  | Total      | 8.928 | 7.509 | 7.664  | 10.192 |                    |      |
| CDC CFS Headaches                | Psychology | 5.262 | 5.548 | 3.533  | 6.991  | 1.611 <sup>a</sup> | .203 |
|                                  | Nutrition  | 7.646 | 7.040 | 5.506  | 9.786  |                    |      |
|                                  | Combined   | 6.346 | 5.857 | 4.715  | 7.977  |                    |      |
|                                  | Total      | 6.431 | 6.200 | 5.3871 | 7.474  |                    |      |
| CDC CFS Memory Problems          | Psychology | 6.333 | 4.996 | 4.777  | 7.890  | 3.403 <sup>b</sup> | .182 |
|                                  | Nutrition  | 9.409 | 7.183 | 7.225  | 11.593 |                    |      |
|                                  | Combined   | 8.173 | 7.610 | 6.055  | 10.292 |                    |      |
|                                  | Total      | 8.007 | 6.835 | 6.857  | 9.158  |                    |      |
| CDC CFS Difficulty Concentrating | Psychology | 8.500 | 6.094 | 6.601  | 10.399 | .391 <sup>a</sup>  | .677 |
|                                  | Nutrition  | 9.822 | 7.641 | 7.499  | 12.145 |                    |      |
|                                  | Combined   | 9.135 | 6.942 | 7.202  | 11.067 |                    |      |
|                                  | Total      | 9.161 | 6.903 | 7.999  | 10.323 |                    |      |
| CDC CFS Nausea                   | Psychology | 3.476 | 4.845 | 1.966  | 4.986  | 1.162 <sup>a</sup> | .316 |
|                                  | Nutrition  | 4.769 | 5.135 | 3.208  | 6.330  |                    |      |
|                                  | Combined   | 3.327 | 4.902 | 1.962  | 4.692  |                    |      |
|                                  | Total      | 3.832 | 4.966 | 2.996  | 4.668  |                    |      |
| CDC CFS Abdominal Pain           | Psychology | 2.548 | 3.270 | 1.529  | 3.567  | 5.971 <sup>b</sup> | .051 |
|                                  | Nutrition  | 5.064 | 5.165 | 3.493  | 6.634  |                    |      |
|                                  | Combined   | 3.750 | 4.635 | 2.460  | 5.041  |                    |      |
|                                  | Total      | 3.803 | 4.535 | 3.040  | 4.566  |                    |      |
| CDC CFS Sinus Nasal Symptoms     | Psychology | 3.524 | 4.702 | 2.059  | 4.989  | 1.192 <sup>a</sup> | .307 |
|                                  | Nutrition  | 5.469 | 6.476 | 3.500  | 7.438  |                    |      |

|                                                 |            |        |        |        |         |                   |      |
|-------------------------------------------------|------------|--------|--------|--------|---------|-------------------|------|
|                                                 | Combined   | 4.789  | 6.304  | 3.034  | 6.544   |                   |      |
|                                                 | Total      | 4.620  | 5.932  | 3.622  | 5.619   |                   |      |
| CDC CFS Shortness Of<br>Breath                  | Psychology | 3.000  | 4.191  | 1.694  | 4.306   | .095 <sup>a</sup> | .909 |
|                                                 | Nutrition  | 3.285  | 4.090  | 2.026  | 4.543   |                   |      |
|                                                 | Combined   | 3.392  | 4.788  | 2.046  | 4.739   |                   |      |
|                                                 | Total      | 3.237  | 4.365  | 2.497  | 3.977   |                   |      |
| CDC CFS Sensitivity To<br>Light                 | Psychology | 3.429  | 5.347  | 1.762  | 5.095   | .794 <sup>a</sup> | .454 |
|                                                 | Nutrition  | 5.031  | 6.097  | 3.177  | 6.884   |                   |      |
|                                                 | Combined   | 4.481  | 6.360  | 2.710  | 6.251   |                   |      |
|                                                 | Total      | 4.336  | 5.975  | 3.330  | 5.342   |                   |      |
| CDC CFS Depression                              | Psychology | 3.952  | 3.938  | 2.725  | 5.180   | .160 <sup>b</sup> | .923 |
|                                                 | Nutrition  | 4.477  | 5.450  | 2.821  | 6.134   |                   |      |
|                                                 | Combined   | 5.077  | 5.950  | 3.420  | 6.734   |                   |      |
|                                                 | Total      | 4.544  | 5.231  | 3.663  | 5.424   |                   |      |
| CDC CFS Maladaptive<br>Stress Index Scale Score | Psychology | 94.381 | 16.836 | 89.134 | 99.628  | .465 <sup>a</sup> | .629 |
|                                                 | Nutrition  | 96.386 | 21.946 | 89.714 | 103.059 |                   |      |
|                                                 | Combined   | 98.269 | 19.165 | 92.934 | 103.605 |                   |      |
|                                                 | Total      | 96.486 | 19.373 | 93.225 | 99.747  |                   |      |

<sup>a</sup> *F*-statistic for one-way analysis of variance, d.f. = 2,134

<sup>b</sup> *H*-statistic for Kruskal-Wallis test, d.f. = 2

<sup>c</sup>  $\chi^2$ -statistic for comparison of nominal level data, d.f. = 2

<sup>d</sup> number of males

\* test is significant at the  $p < .05$  level

1  
2  
3  
4  
5  
6  
7  
8  
9  
10  
11  
12  
13  
14  
15  
16  
17  
18  
19  
20  
21  
22  
23  
24  
25  
26  
27  
28  
29  
30  
31  
32  
33  
34  
35  
36  
37  
38  
39  
40  
41  
42  
43  
44  
45  
46  
47  
48  
49

Table 2. Outcome variable comparisons across time

|                           |            | Baseline |        |                 |        | 3-month follow-up |        |                 |        | Comparisons |         |
|---------------------------|------------|----------|--------|-----------------|--------|-------------------|--------|-----------------|--------|-------------|---------|
|                           |            | Mean     | SD     | 95% CI for Mean |        | Mean              | SD     | 95% CI for Mean |        | z-statistic | p-value |
|                           |            |          |        | Lower           | Upper  |                   |        | Lower           | Upper  |             |         |
| SF-36                     | Psychology | 49.339   | 22.698 | 42.266          | 56.413 | 59.267            | 30.346 | 41.745          | 76.788 | -2.707      | .007**  |
| Physical Functioning      | Nutrition  | 47.855   | 26.226 | 39.882          | 55.829 | 46.706            | 30.744 | 34.544          | 58.868 | -1.136      | .256    |
|                           | Combined   | 45.299   | 25.479 | 38.206          | 52.393 | 49.288            | 26.403 | 39.604          | 58.973 | -1.850      | .064    |
|                           | Total      | 47.344   | 24.791 | 43.171          | 51.517 | 50.260            | 28.818 | 43.488          | 57.032 | -3.120      | .002**  |
| SF-36                     | Psychology | 7.143    | 15.894 | 2.190           | 12.096 | 46.429            | 39.048 | 23.883          | 68.974 | -2.379      | .017*   |
| Role limitations physical | Nutrition  | 7.574    | 17.500 | 2.254           | 12.895 | 19.444            | 20.016 | 11.526          | 27.363 | -2.907      | .004**  |
|                           | Combined   | 9.774    | 21.051 | 3.914           | 15.635 | 22.742            | 25.161 | 13.513          | 31.971 | -2.225      | .026*   |
|                           | Total      | 8.272    | 18.387 | 5.177           | 11.367 | 26.111            | 28.225 | 19.479          | 32.744 | -4.354      | .001*** |
| SF-36                     | Psychology | 61.548   | 25.614 | 53.566          | 69.530 | 63.929            | 29.786 | 46.731          | 81.127 | -1.196      | .232    |
| Bodily pain               | Nutrition  | 55.625   | 30.242 | 46.434          | 64.819 | 58.889            | 32.943 | 45.857          | 71.921 | -1.800      | .072    |
|                           | Combined   | 53.606   | 27.019 | 46.084          | 61.128 | 58.629            | 27.301 | 48.615          | 68.643 | -1.048      | .294    |
|                           | Total      | 56.667   | 27.683 | 52.007          | 61.327 | 59.757            | 29.649 | 52.790          | 66.724 | -2.240      | .025*   |
| SF-36                     | Psychology | 37.202   | 21.824 | 30.402          | 44.003 | 59.821            | 33.318 | 40.584          | 79.058 | -2.689      | .007**  |
| Social functioning        | Nutrition  | 32.671   | 25.888 | 24.800          | 40.541 | 43.519            | 33.679 | 30.196          | 56.841 | -2.476      | .013*   |
|                           | Combined   | 32.452   | 24.786 | 25.551          | 39.352 | 41.936            | 28.604 | 31.443          | 52.428 | -2.426      | .015*   |
|                           | Total      | 33.967   | 24.212 | 29.892          | 38.043 | 46.007            | 31.805 | 38.533          | 53.481 | -4.504      | .001*** |
| SF-36                     | Psychology | 60.286   | 19.584 | 54.183          | 66.389 | 74.571            | 13.276 | 66.906          | 82.237 | -2.497      | .013*   |
| General mental health     | Nutrition  | 59.727   | 19.355 | 53.843          | 65.612 | 64.741            | 20.548 | 56.612          | 72.869 | -1.696      | .090    |
|                           | Combined   | 58.308   | 20.948 | 52.476          | 64.140 | 64.129            | 16.637 | 58.027          | 70.232 | -.524       | .600    |

|                 |            |        |         |        |        |        |        |        |        |        |         |
|-----------------|------------|--------|---------|--------|--------|--------|--------|--------|--------|--------|---------|
|                 | Total      | 59.362 | 19.911  | 56.011 | 62.714 | 66.389 | 17.897 | 62.183 | 70.594 | -2.665 | .008**  |
| SF-36           | Psychology | 55.554 | 46.368  | 41.105 | 70.004 | 76.191 | 33.150 | 57.051 | 95.331 | -.842  | .400    |
| Role            | Nutrition  | 48.482 | 47.390  | 34.074 | 62.890 | 55.594 | 38.130 | 40.510 | 70.678 | -1.788 | .074    |
| limitations     | Combined   | 47.780 | 43.924  | 35.551 | 60.008 | 67.742 | 32.756 | 55.727 | 79.757 | -2.313 | .021*   |
| emotional       | Total      | 50.370 | 45.590  | 42.695 | 58.044 | 64.829 | 35.335 | 56.526 | 73.133 | -3.159 | .002**  |
| SF-36           | Psychology | 20.714 | 16.139  | 15.685 | 25.743 | 41.071 | 20.586 | 29.186 | 52.957 | -3.066 | .002**  |
| Vitality Energy | Nutrition  | 20.114 | 14.5670 | 15.685 | 24.542 | 31.111 | 23.588 | 21.780 | 40.442 | -2.734 | .006**  |
| or Fatigue      | Combined   | 19.039 | 17.658  | 14.123 | 23.955 | 27.097 | 19.527 | 19.934 | 34.259 | -1.558 | .119    |
|                 | Total      | 19.891 | 16.159  | 17.171 | 22.611 | 31.319 | 21.657 | 26.230 | 36.409 | -4.205 | .001*** |
| SF-36           | Psychology | 37.024 | 17.945  | 31.432 | 42.616 | 45.714 | 21.109 | 33.526 | 57.903 | -2.561 | .010*   |
| General health  | Nutrition  | 28.636 | 15.528  | 23.915 | 33.357 | 36.482 | 18.903 | 29.004 | 43.959 | -2.157 | .031*   |
| perceptions     | Combined   | 30.962 | 17.575  | 26.069 | 35.854 | 42.097 | 21.632 | 34.162 | 50.032 | -2.423 | .015*   |
|                 | Total      | 32.065 | 17.286  | 29.156 | 34.975 | 40.694 | 20.561 | 35.863 | 45.526 | -3.996 | .001*** |
| MHLCS           | Psychology | .677   | .159    | .627   | .726   | .821   | .251   | .676   | .966   | -2.983 | .003**  |
| Internal        | Nutrition  | .622   | .177    | .568   | .675   | 1.193  | 2.969  | .019   | 2.368  | -.687  | .492    |
|                 | Combined   | .662   | .174    | .613   | .710   | .779   | .318   | .662   | .896   | -1.755 | .079    |
|                 | Total      | .653   | .171    | .624   | .682   | .942   | 1.822  | .514   | 1.371  | -2.962 | .003**  |
| MHLCS           | Psychology | .368   | .156    | .320   | .417   | .351   | .152   | .263   | .439   | -2.594 | .009**  |
| Chance          | Nutrition  | .340   | .133    | .299   | .380   | .911   | 3.020  | -.284  | 2.105  | -.143  | .886    |
|                 | Combined   | .354   | .155    | .311   | .397   | .314   | .133   | .265   | .363   | -.672  | .501    |
|                 | Total      | .354   | .148    | .329   | .379   | .545   | 1.853  | .109   | .980   | -1.552 | .121    |
| MHLCS           | Psychology | .404   | .134    | .362   | .446   | .441   | .315   | .259   | .624   | .000   | 1.000   |
| Powerful        | Nutrition  | .418   | .141    | .374   | .460   | .804   | 2.244  | -.084  | 1.691  | -1.843 | .065    |
| Others          | Combined   | .407   | .101    | .379   | .436   | .434   | .279   | .331   | .536   | -.577  | .564    |
|                 | Total      | .409   | .124    | .388   | .430   | .574   | 1.3880 | .248   | .900   | -1.601 | .109    |

1  
2  
3  
4  
5  
6  
7  
8  
9  
10  
11  
12  
13  
14  
15  
16  
17  
18  
19  
20  
21  
22  
23  
24  
25  
26  
27  
28  
29  
30  
31  
32  
33  
34  
35  
36  
37  
38  
39  
40  
41  
42  
43  
44  
45  
46  
47  
48  
49

|              |            |        |       |        |        |        |       |        |        |        |         |
|--------------|------------|--------|-------|--------|--------|--------|-------|--------|--------|--------|---------|
| MHLCS        | Psychology | .169   | .082  | .143   | .194   | .131   | .093  | .077   | .185   | -1.122 | .262    |
| Doctors      | Nutrition  | .171   | .089  | .144   | .197   | .657   | 2.668 | -.398  | 1.713  | -1.686 | .092    |
|              | Combined   | .191   | .147  | .150   | .232   | .153   | .070  | .128   | .179   | -1.384 | .166    |
|              | Total      | .178   | .112  | .159   | .196   | .338   | 1.635 | -.0462 | .722   | -2.381 | .017*   |
| MHLCS        | Psychology | .235   | .075  | .212   | .259   | .268   | .189  | .159   | .377   | -.118  | .906    |
| Other People | Nutrition  | .264   | .129  | .225   | .304   | .739   | 2.652 | -.311  | 1.788  | -1.697 | .090    |
|              | Combined   | .245   | .074  | .224   | .265   | .252   | .118  | .209   | .295   | -.213  | .831    |
|              | Total      | .248   | .095  | .232   | .264   | .438   | 1.626 | .055   | .820   | -1.186 | .236    |
| MFI          | Psychology | 15.952 | 2.845 | 15.066 | 16.839 | 13.786 | 4.441 | 11.222 | 16.350 | -2.657 | .008**  |
| General      | Nutrition  | 16.977 | 2.601 | 16.186 | 17.768 | 14.704 | 4.898 | 12.766 | 16.641 | -2.548 | .011*   |
| Fatigue      | Combined   | 17.327 | 2.588 | 16.607 | 18.047 | 16.645 | 2.811 | 15.614 | 17.676 | -.854  | .393    |
|              | Total      | 16.797 | 2.716 | 16.340 | 17.254 | 15.361 | 4.136 | 14.389 | 16.333 | -3.692 | .001*** |
| MFI          | Psychology | 15.929 | 3.331 | 14.891 | 16.966 | 13.071 | 4.632 | 10.397 | 15.746 | -2.810 | .005**  |
| Physical     | Nutrition  | 16.727 | 3.358 | 15.707 | 17.748 | 14.222 | 4.987 | 12.249 | 16.195 | -2.791 | .005**  |
| Fatigue      | Combined   | 17.615 | 2.823 | 16.830 | 18.401 | 16.484 | 3.395 | 15.239 | 17.729 | -2.364 | .018*   |
|              | Total      | 16.819 | 3.211 | 16.278 | 17.359 | 14.972 | 4.453 | 13.926 | 16.019 | -4.591 | .001*** |
| MFI          | Psychology | 13.857 | 4.112 | 12.576 | 15.138 | 10.643 | 5.153 | 7.668  | 13.618 | -2.142 | .032*   |
| Reduced      | Nutrition  | 14.136 | 4.027 | 12.912 | 15.361 | 12.259 | 5.012 | 10.277 | 14.242 | -2.164 | .030*   |
| Activity     | Combined   | 14.962 | 3.662 | 13.942 | 15.981 | 14.936 | 3.777 | 13.550 | 16.321 | -.070  | .944    |
|              | Total      | 14.362 | 3.921 | 13.702 | 15.022 | 13.097 | 4.798 | 11.970 | 14.225 | -2.421 | .015*   |
| MFI          | Psychology | 10.357 | 4.287 | 9.021  | 11.693 | 7.286  | 4.214 | 4.853  | 9.719  | -2.131 | .033*   |
| Reduced      | Nutrition  | 10.500 | 3.474 | 9.444  | 11.556 | 8.963  | 3.736 | 7.485  | 10.441 | -1.985 | .047*   |
| Motivation   | Combined   | 11.462 | 3.153 | 10.584 | 12.339 | 10.774 | 3.095 | 9.639  | 11.910 | -1.082 | .279    |
|              | Total      | 10.819 | 3.639 | 10.206 | 11.431 | 9.417  | 3.767 | 8.532  | 10.302 | -2.986 | .003**  |
| MFI          | Psychology | 13.524 | 4.363 | 12.164 | 14.883 | 10.500 | 4.468 | 7.920  | 13.080 | -2.950 | .003*   |



|                |            |        |       |        |        |        |       |        |        |        |         |
|----------------|------------|--------|-------|--------|--------|--------|-------|--------|--------|--------|---------|
| Mental Fatigue | Nutrition  | 13.682 | 4.328 | 12.366 | 14.998 | 11.926 | 5.334 | 9.816  | 14.036 | -2.082 | .037*   |
|                | Combined   | 13.846 | 4.345 | 12.637 | 15.056 | 12.613 | 3.827 | 11.209 | 14.017 | -1.586 | .113    |
|                | Total      | 13.696 | 4.315 | 12.969 | 14.422 | 11.944 | 4.568 | 10.871 | 13.018 | -3.661 | .001*** |
| CDC CFS        | Psychology | 2.571  | 3.109 | 1.603  | 3.540  | 1.429  | 2.278 | .114   | 2.744  | -1.365 | .172    |
| Sore Throat    | Nutrition  | 3.977  | 3.776 | 2.829  | 5.125  | 1.741  | 2.087 | .915   | 2.566  | -2.211 | .027*   |
|                | Combined   | 3.202  | 4.494 | 1.951  | 4.454  | 1.904  | 2.821 | .870   | 2.939  | -.804  | .422    |
|                | Total      | 3.257  | 3.898 | 2.601  | 3.914  | 1.750  | 2.437 | 1.178  | 2.323  | -2.387 | .017*   |
| CDC CFS        | Psychology | 1.976  | 3.382 | .922   | 3.030  | 1.786  | 3.378 | -.165  | 3.736  | -.341  | .733    |
| Swollen        | Nutrition  | 5.561  | 6.491 | 3.587  | 7.534  | 5.000  | 6.760 | 2.326  | 7.674  | -2.212 | .027*   |
| Lymph nodes    | Combined   | 3.462  | 4.881 | 2.103  | 4.820  | 2.690  | 4.477 | 1.0458 | 4.332  | -.725  | .468    |
| Glands         | Total      | 3.679  | 5.250 | 2.795  | 4.563  | 3.380  | 5.385 | 2.115  | 4.646  | -1.684 | .092    |
| CDC CFS        | Psychology | 2.071  | 3.249 | 1.059  | 3.084  | 1.643  | 2.818 | .016   | 3.270  | -.730  | .465    |
| Diarrhoea      | Nutrition  | 2.841  | 4.832 | 1.372  | 4.310  | 1.444  | 3.274 | .149   | 2.740  | -1.649 | .099    |
|                | Combined   | 3.135  | 3.773 | 2.084  | 4.185  | 1.631  | 2.483 | .720   | 2.542  | -1.996 | .046*   |
|                | Total      | 2.717  | 3.998 | 2.044  | 3.390  | 1.563  | 2.827 | .899   | 2.228  | -2.481 | .013*   |
| CDC CFS        | Psychology | 13.286 | 6.271 | 11.331 | 15.240 | 11.071 | 6.673 | 7.218  | 14.925 | -1.550 | .121    |
| Fatigue after  | Nutrition  | 13.722 | 6.450 | 11.761 | 15.682 | 11.815 | 7.217 | 8.960  | 14.670 | -2.209 | .027*   |
| exertion       | Combined   | 14.154 | 6.270 | 12.408 | 15.899 | 11.436 | 6.275 | 9.134  | 13.738 | -2.392 | .017*   |
|                | Total      | 13.752 | 6.292 | 12.693 | 14.811 | 11.507 | 6.629 | 9.949  | 13.065 | -3.574 | .001*** |
| CDC CFS        | Psychology | 8.286  | 6.747 | 6.183  | 10.388 | 7.429  | 6.892 | 3.450  | 11.408 | -2.145 | .032*   |
| Muscle Aches   | Nutrition  | 9.091  | 6.383 | 7.151  | 11.031 | 7.222  | 6.278 | 4.739  | 9.706  | -2.901 | .004**  |
| or Muscle      | Combined   | 8.519  | 6.932 | 6.589  | 10.449 | 6.188  | 5.528 | 4.160  | 8.215  | -1.908 | .056    |
| Pains          | Total      | 8.630  | 6.664 | 7.509  | 9.752  | 6.817  | 6.029 | 5.400  | 8.234  | -3.995 | .001*** |
| CDC CFS        | Psychology | 3.476  | 5.334 | 1.814  | 5.138  | 2.786  | 4.458 | .212   | 5.360  | -1.778 | .075    |
| Pain In Joints | Nutrition  | 4.696  | 5.560 | 3.006  | 6.386  | 3.926  | 5.099 | 1.909  | 5.943  | -2.022 | .043*   |

|              |            |        |       |        |        |        |       |       |        |        |         |
|--------------|------------|--------|-------|--------|--------|--------|-------|-------|--------|--------|---------|
|              | Combined   | 5.474  | 6.386 | 3.696  | 7.251  | 3.010  | 4.140 | 1.492 | 4.528  | -1.840 | .066    |
|              | Total      | 4.618  | 5.837 | 3.635  | 5.600  | 3.310  | 4.543 | 2.242 | 4.377  | -3.141 | .002**  |
| CDC CFS      | Psychology | 1.238  | 2.516 | .454   | 2.022  | 1.643  | 4.181 | -.771 | 4.057  | -.135  | .892    |
| Fever        | Nutrition  | 1.394  | 2.562 | .615   | 2.173  | .630   | 2.041 | -.178 | 1.437  | -1.487 | .137    |
|              | Combined   | 1.333  | 3.909 | .245   | 2.421  | .378   | .709  | .118  | .638   | -1.517 | .129    |
|              | Total      | 1.324  | 3.106 | .801   | 1.846  | .718   | 2.272 | .185  | 1.252  | -1.876 | .061    |
| CDC CFS      | Psychology | 3.357  | 4.637 | 1.912  | 4.802  | 2.571  | 4.398 | .032  | 5.111  | -1.970 | .049*   |
| Chills       | Nutrition  | 3.750  | 3.924 | 2.557  | 4.943  | 2.222  | 4.098 | .601  | 3.843  | -3.401 | .001*** |
|              | Combined   | 3.192  | 4.343 | 1.983  | 4.402  | 1.908  | 2.797 | .882  | 2.934  | -2.049 | .040*   |
|              | Total      | 3.420  | 4.283 | 2.699  | 4.141  | 2.155  | 3.614 | 1.306 | 3.004  | -4.206 | .001*** |
| CDC CFS      | Psychology | 12.905 | 6.792 | 10.788 | 15.021 | 10.643 | 6.698 | 6.776 | 14.510 | -.802  | .422    |
| Unrefreshing | Nutrition  | 12.250 | 7.088 | 10.095 | 14.405 | 9.444  | 7.738 | 6.384 | 12.505 | -1.421 | .155    |
| Sleep        | Combined   | 12.154 | 7.147 | 10.164 | 14.143 | 10.161 | 7.959 | 7.242 | 13.080 | -1.513 | .130    |
|              | Total      | 12.413 | 6.978 | 11.238 | 13.588 | 9.986  | 7.557 | 8.210 | 11.762 | -2.295 | .022*   |
| CDC CFS      | Psychology | 9.286  | 7.658 | 6.899  | 11.672 | 5.286  | 4.921 | 2.444 | 8.127  | -1.738 | .082    |
| Sleeping     | Nutrition  | 8.614  | 7.317 | 6.389  | 10.838 | 9.482  | 9.200 | 5.842 | 13.121 | -.190  | .849    |
| Problems     | Combined   | 8.904  | 7.681 | 6.766  | 11.042 | 6.529  | 6.749 | 4.053 | 9.004  | -1.794 | .073    |
|              | Total      | 8.928  | 7.509 | 7.664  | 10.192 | 7.394  | 7.585 | 5.612 | 9.177  | -1.983 | .047*   |
| CDC CFS      | Psychology | 5.262  | 5.548 | 3.533  | 6.991  | 4.357  | 3.411 | 2.388 | 6.326  | -1.200 | .230    |
| Headaches    | Nutrition  | 7.646  | 7.040 | 5.506  | 9.786  | 5.185  | 6.294 | 2.695 | 7.675  | -2.084 | .037*   |
|              | Combined   | 6.346  | 5.857 | 4.715  | 7.977  | 4.050  | 3.527 | 2.756 | 5.343  | -2.807 | .005**  |
|              | Total      | 6.431  | 6.200 | 5.387  | 7.474  | 4.535  | 4.708 | 3.429 | 5.642  | -3.000 | .003**  |
| CDC CFS      | Psychology | 6.333  | 4.996 | 4.777  | 7.890  | 3.500  | 3.995 | 1.193 | 5.807  | -1.965 | .049*   |
| Memory       | Nutrition  | 9.409  | 7.183 | 7.225  | 11.593 | 8.667  | 7.681 | 5.628 | 11.705 | -.338  | .735    |
| Problems     | Combined   | 8.173  | 7.610 | 6.055  | 10.292 | 6.148  | 4.905 | 4.349 | 7.947  | -1.446 | .148    |

|                |            |       |       |       |        |       |       |       |        |        |         |
|----------------|------------|-------|-------|-------|--------|-------|-------|-------|--------|--------|---------|
|                | Total      | 8.007 | 6.835 | 6.857 | 9.158  | 6.578 | 6.189 | 5.123 | 8.032  | -2.053 | .040*   |
| CDC CFS        | Psychology | 8.500 | 6.094 | 6.601 | 10.399 | 5.143 | 5.559 | 1.933 | 8.353  | -2.809 | .005**  |
| Difficulty     | Nutrition  | 9.822 | 7.641 | 7.499 | 12.145 | 7.778 | 6.941 | 5.032 | 10.524 | -1.196 | .232    |
| Concentrating  | Combined   | 9.135 | 6.942 | 7.202 | 11.067 | 6.507 | 4.843 | 4.731 | 8.283  | -1.899 | .058    |
|                | Total      | 9.161 | 6.903 | 7.999 | 10.323 | 6.718 | 5.844 | 5.345 | 8.092  | -3.440 | .001*** |
| CDC CFS        | Psychology | 3.476 | 4.845 | 1.966 | 4.986  | 2.286 | 2.946 | .585  | 3.987  | -.213  | .832    |
| Nausea         | Nutrition  | 4.769 | 5.135 | 3.208 | 6.330  | 3.407 | 5.746 | 1.134 | 5.681  | -1.686 | .092    |
|                | Combined   | 3.327 | 4.902 | 1.962 | 4.692  | 3.458 | 3.585 | 2.144 | 4.773  | -.855  | .392    |
|                | Total      | 3.832 | 4.966 | 2.996 | 4.668  | 3.211 | 4.396 | 2.178 | 4.244  | -.584  | .559    |
| CDC CFS        | Psychology | 2.548 | 3.270 | 1.529 | 3.567  | 2.786 | 4.003 | .474  | 5.097  | -.343  | .732    |
| Abdominal      | Nutrition  | 5.064 | 5.165 | 3.493 | 6.634  | 3.593 | 3.905 | 2.048 | 5.137  | -1.968 | .049*   |
| Pain           | Combined   | 3.750 | 4.635 | 2.460 | 5.041  | 2.548 | 2.791 | 1.524 | 3.572  | -.598  | .550    |
|                | Total      | 3.803 | 4.535 | 3.040 | 4.566  | 2.986 | 3.470 | 2.171 | 3.801  | -1.727 | .084    |
| CDC CFS        | Psychology | 3.524 | 4.702 | 2.059 | 4.989  | 2.357 | 2.437 | .950  | 3.764  | -.724  | .469    |
| Sinus Nasal    | Nutrition  | 5.469 | 6.476 | 3.500 | 7.438  | 4.889 | 6.104 | 2.474 | 7.304  | -1.400 | .162    |
| Symptoms       | Combined   | 4.789 | 6.304 | 3.034 | 6.544  | 3.804 | 6.710 | 1.343 | 6.266  | -2.482 | .013*   |
|                | Total      | 4.620 | 5.931 | 3.622 | 5.619  | 3.930 | 5.882 | 2.547 | 5.312  | -2.971 | .003**  |
| CDC CFS        | Psychology | 3.000 | 4.191 | 1.694 | 4.306  | 1.571 | 2.209 | .296  | 2.847  | -1.556 | .120    |
| Shortness Of   | Nutrition  | 3.285 | 4.090 | 2.026 | 4.543  | 2.407 | 4.060 | .801  | 4.013  | -1.849 | .064    |
| Breath         | Combined   | 3.392 | 4.788 | 2.046 | 4.739  | 2.526 | 3.631 | 1.194 | 3.858  | -.976  | .329    |
|                | Total      | 3.237 | 4.365 | 2.497 | 3.977  | 2.296 | 3.554 | 1.461 | 3.131  | -2.538 | .011*   |
| CDC CFS        | Psychology | 3.429 | 5.347 | 1.762 | 5.095  | 1.214 | 2.517 | -.239 | 2.668  | -1.973 | .049*   |
| Sensitivity To | Nutrition  | 5.031 | 6.097 | 3.177 | 6.884  | 4.111 | 6.198 | 1.659 | 6.563  | -2.136 | .033*   |
| Light          | Combined   | 4.481 | 6.360 | 2.710 | 6.251  | 3.297 | 5.557 | 1.259 | 5.335  | -.787  | .431    |
|                | Total      | 4.336 | 5.975 | 3.330 | 5.342  | 3.197 | 5.419 | 1.924 | 4.471  | -2.542 | .011*   |

1  
2  
3  
4  
5  
6  
7  
8  
9  
10  
11  
12  
13  
14  
15  
16  
17  
18  
19  
20  
21  
22  
23  
24  
25  
26  
27  
28  
29  
30  
31  
32  
33  
34  
35  
36  
37  
38  
39  
40  
41  
42  
43  
44  
45  
46  
47  
48  
49

|              |            |        |        |        |         |        |        |        |        |        |         |
|--------------|------------|--------|--------|--------|---------|--------|--------|--------|--------|--------|---------|
| CDC CFS      | Psychology | 3.952  | 3.938  | 2.725  | 5.180   | 1.571  | 3.228  | -.292  | 3.435  | -1.614 | .106    |
| Depression   | Nutrition  | 4.477  | 5.450  | 2.821  | 6.134   | 3.333  | 4.883  | 1.402  | 5.265  | -1.584 | .113    |
|              | Combined   | 5.077  | 5.950  | 3.420  | 6.734   | 2.766  | 3.324  | 1.547  | 3.985  | -1.304 | .192    |
|              | Total      | 4.544  | 5.230  | 3.663  | 5.424   | 2.747  | 3.964  | 1.815  | 3.678  | -2.297 | .022*   |
| CDC CFS      | Psychology | 94.381 | 16.836 | 89.134 | 99.628  | 78.571 | 18.434 | 67.928 | 89.215 | -3.111 | .002**  |
| Maladaptive  | Nutrition  | 96.386 | 21.946 | 89.714 | 103.059 | 85.259 | 27.665 | 74.315 | 96.203 | -3.443 | .001*** |
| Stress Index | Combined   | 98.269 | 19.165 | 92.934 | 103.605 | 87.484 | 22.965 | 79.060 | 95.908 | -2.215 | .027*   |
| Scale Score  | Total      | 96.486 | 19.373 | 93.225 | 99.747  | 84.917 | 24.004 | 79.276 | 90.557 | -5.123 | .001*** |

<sup>a</sup> z-statistic for Wilcoxon Signed-Rank Test

Table 3. Change score comparisons between intervention groups

|                      |            | % change over time for sig. results <sup>a</sup> | Mean    | Std. Deviation | Std. Error | 95% CI for Mean |         | <i>H</i> <sup>b</sup> | p-value |
|----------------------|------------|--------------------------------------------------|---------|----------------|------------|-----------------|---------|-----------------------|---------|
|                      |            |                                                  |         |                |            | Lower           | Upper   |                       |         |
| SF-36                | Psychology | 16.75                                            | -13.629 | 14.990         | 4.006      | -22.285         | -4.974  | 3.215                 | .200    |
| Physical Functioning | Nutrition  |                                                  | -.407   | 19.967         | 3.843      | -8.306          | 7.492   |                       |         |
|                      | Combined   |                                                  | -6.813  | 18.242         | 3.276      | -13.505         | -.122   |                       |         |
|                      | Total      | 5.80                                             | -5.736  | 18.744         | 2.209      | -10.141         | -1.332  |                       |         |
| SF-36                | Psychology | 84.61                                            | -33.929 | 39.960         | 10.680     | -57.001         | -10.856 | 1.558                 | .459    |

|    |                           |            |       |         |        |        |         |         |       |      |
|----|---------------------------|------------|-------|---------|--------|--------|---------|---------|-------|------|
| 1  |                           |            |       |         |        |        |         |         |       |      |
| 2  |                           |            |       |         |        |        |         |         |       |      |
| 3  |                           |            |       |         |        |        |         |         |       |      |
| 4  |                           |            |       |         |        |        |         |         |       |      |
| 5  | Role limitations physical | Nutrition  | 61.05 | -14.509 | 21.005 | 4.042  | -22.818 | -6.199  |       |      |
| 6  |                           | Combined   | 57.02 | -13.871 | 31.457 | 5.650  | -25.409 | -2.333  |       |      |
| 7  |                           | Total      | 63.32 | -18.010 | 30.564 | 3.602  | -25.192 | -10.828 |       |      |
| 8  | SF-36                     | Psychology |       | -6.071  | 15.588 | 4.166  | -15.072 | 2.929   | .163  | .922 |
| 9  | Bodily pain               | Nutrition  |       | -6.574  | 18.800 | 3.618  | -14.011 | .863    |       |      |
| 10 |                           | Combined   |       | -3.387  | 25.532 | 4.586  | -12.752 | 5.978   |       |      |
| 11 |                           | Total      | 5.17  | -5.104  | 21.252 | 2.505  | -10.098 | -.110   |       |      |
| 12 | SF-36                     | Psychology | 37.81 | -24.107 | 24.741 | 6.612  | -38.392 | -9.822  | 3.301 | .192 |
| 13 | Social functioning        | Nutrition  | 24.93 | -10.648 | 20.423 | 3.931  | -18.727 | -2.569  |       |      |
| 14 |                           | Combined   | 22.60 | -11.290 | 24.013 | 4.313  | -20.098 | -2.482  |       |      |
| 15 |                           | Total      | 26.17 | -13.542 | 23.149 | 2.728  | -18.981 | -8.102  |       |      |
| 16 | SF-36                     | Psychology | 19.15 | -12.000 | 14.294 | 3.820  | -20.253 | -3.747  | 4.404 | .111 |
| 17 | General mental health     | Nutrition  |       | -3.259  | 15.963 | 3.072  | -9.574  | 3.056   |       |      |
| 18 |                           | Combined   |       | -.645   | 16.911 | 3.037  | -6.848  | 5.558   |       |      |
| 19 |                           | Total      | 10.58 | -3.833  | 16.409 | 1.934  | -7.689  | .022    |       |      |
| 20 | SF-36                     | Psychology |       | -9.527  | 49.664 | 13.273 | -38.202 | 19.148  | .573  | .751 |
| 21 | Role limitations          | Nutrition  |       | -18.561 | 55.759 | 10.731 | -40.618 | 3.497   |       |      |
| 22 | emotional                 | Combined   | 29.47 | -18.284 | 52.240 | 9.383  | -37.446 | .878    |       |      |
| 23 |                           | Total      | 10.58 | -16.685 | 52.496 | 6.187  | -29.021 | -4.349  |       |      |
| 24 | SF-36                     | Psychology | 49.57 | -17.500 | 15.902 | 4.250  | -26.682 | -8.318  | 4.988 | .083 |
| 25 | Vitality Energy or        | Nutrition  | 35.35 | -11.482 | 19.206 | 3.696  | -19.079 | -3.884  |       |      |
| 26 | Fatigue                   | Combined   |       | -6.129  | 17.688 | 3.177  | -12.617 | .359    |       |      |
| 27 |                           | Total      | 22.30 | -10.347 | 18.219 | 2.147  | -14.628 | -6.066  |       |      |
| 28 | SF-36                     | Psychology | 19.01 | -11.429 | 14.335 | 3.831  | -19.705 | -3.152  | .627  | .731 |
| 29 | General health            | Nutrition  | 29.73 | -6.852  | 15.201 | 2.925  | -12.865 | -.839   |       |      |
| 30 |                           |            |       |         |        |        |         |         |       |      |
| 31 |                           |            |       |         |        |        |         |         |       |      |
| 32 |                           |            |       |         |        |        |         |         |       |      |
| 33 |                           |            |       |         |        |        |         |         |       |      |
| 34 |                           |            |       |         |        |        |         |         |       |      |
| 35 |                           |            |       |         |        |        |         |         |       |      |
| 36 |                           |            |       |         |        |        |         |         |       |      |
| 37 |                           |            |       |         |        |        |         |         |       |      |
| 38 |                           |            |       |         |        |        |         |         |       |      |
| 39 |                           |            |       |         |        |        |         |         |       |      |
| 40 |                           |            |       |         |        |        |         |         |       |      |
| 41 |                           |            |       |         |        |        |         |         |       |      |
| 42 |                           |            |       |         |        |        |         |         |       |      |
| 43 |                           |            |       |         |        |        |         |         |       |      |
| 44 |                           |            |       |         |        |        |         |         |       |      |
| 45 |                           |            |       |         |        |        |         |         |       |      |
| 46 |                           |            |       |         |        |        |         |         |       |      |
| 47 |                           |            |       |         |        |        |         |         |       |      |
| 48 |                           |            |       |         |        |        |         |         |       |      |
| 49 |                           |            |       |         |        |        |         |         |       |      |

1  
2  
3  
4  
5  
6  
7  
8  
9  
10  
11  
12  
13  
14  
15  
16  
17  
18  
19  
20  
21  
22  
23  
24  
25  
26  
27  
28  
29  
30  
31  
32  
33  
34  
35  
36  
37  
38  
39  
40  
41  
42  
43  
44  
45  
46  
47  
48  
49

|                       |            |       |         |        |       |         |        |       |       |
|-----------------------|------------|-------|---------|--------|-------|---------|--------|-------|-------|
| perceptions           | Combined   | 26.45 | -10.161 | 22.154 | 3.97  | -18.288 | -2.035 |       |       |
|                       | Total      | 36.49 | -9.167  | 18.251 | 2.151 | -13.455 | -4.878 |       |       |
| MHLCS Internal        | Psychology | 17.56 | -.146   | .203   | .054  | -.263   | -.029  | 3.402 | .183  |
|                       | Nutrition  |       | -.573   | 3.028  | .583  | -1.771  | .625   |       |       |
|                       | Combined   |       | -.106   | .315   | .057  | -.222   | .010   |       |       |
|                       | Total      | 30.67 | -.289   | 1.859  | .219  | -.726   | .148   |       |       |
| MHLCS Chance          | Psychology | 4.67  | .077    | .098   | .026  | .021    | .134   | 7.674 | .022* |
|                       | Nutrition  |       | -.570   | 3.019  | .581  | -1.765  | .624   |       |       |
|                       | Combined   |       | .001    | .081   | .015  | -.029   | .031   |       |       |
|                       | Total      |       | -.198   | 1.852  | .218  | -.633   | .237   |       |       |
| MHLCS Powerful Others | Psychology |       | -.054   | .284   | .076  | -.218   | .109   | 1.571 | .456  |
|                       | Nutrition  |       | -.375   | 2.282  | .439  | -1.277  | .528   |       |       |
|                       | Combined   |       | -.030   | .277   | .050  | -.132   | .072   |       |       |
|                       | Total      |       | -.164   | 1.408  | .166  | -.495   | .167   |       |       |
| MHLCS Doctors         | Psychology |       | .020    | .058   | .0155 | -.014   | .053   | 0.076 | .963  |
|                       | Nutrition  |       | -.492   | 2.678  | .515  | -1.551  | .568   |       |       |
|                       | Combined   |       | .057    | .199   | .036  | -.016   | .130   |       |       |
|                       | Total      | 47.49 | -.156   | 1.647  | .194  | -.543   | .231   |       |       |
| MHLCS<br>Other People | Psychology |       | -.032   | .166   | .044  | -.128   | .064   | 2.479 | .290  |
|                       | Nutrition  |       | -.446   | 2.692  | .518  | -1.510  | .619   |       |       |
|                       | Combined   |       | -.012   | .096   | .017  | -.047   | .023   |       |       |
|                       | Total      |       | -.178   | 1.645  | .193  | -.565   | .208   |       |       |

|                       |            |       |       |       |      |        |       |       |       |
|-----------------------|------------|-------|-------|-------|------|--------|-------|-------|-------|
| MFI                   | Psychology | 13.58 | 2.571 | 2.766 | .739 | .975   | 4.168 | 6.790 | .034* |
| General Fatigue       | Nutrition  | 13.39 | 2.074 | 3.842 | .740 | .554   | 3.594 |       |       |
|                       | Combined   |       | .419  | 2.233 | .401 | -.400  | 1.238 |       |       |
|                       | Total      | 8.55  | 1.458 | 3.126 | .368 | .724   | 2.193 |       |       |
| MFI                   | Psychology | 17.74 | 2.857 | 2.797 | .748 | 1.242  | 4.472 | 3.038 | .219  |
| Physical Fatigue      | Nutrition  | 15.00 | 2.444 | 4.371 | .841 | .716   | 4.173 |       |       |
|                       | Combined   | 6.42  | 1.290 | 2.735 | .491 | .287   | 2.294 |       |       |
|                       | Total      | 10.98 | 2.028 | 3.468 | .409 | 1.213  | 2.843 |       |       |
| MFI                   | Psychology | 23.20 | 1.857 | 2.932 | .784 | .165   | 3.550 | 1.734 | .420  |
| Reduced Activity      | Nutrition  | 13.28 | 1.148 | 2.685 | .517 | .086   | 2.210 |       |       |
|                       | Combined   |       | .645  | 3.189 | .572 | -.525  | 1.815 |       |       |
|                       | Total      | 8.81  | 1.069 | 2.952 | .348 | .376   | 1.763 |       |       |
| MFI                   | Psychology | 11.42 | 2.500 | 3.502 | .936 | .478   | 4.522 | 5.171 | .075  |
| Reduced Motivation    | Nutrition  | 14.64 | 1.593 | 3.511 | .676 | .204   | 2.982 |       |       |
|                       | Combined   |       | .129  | 3.471 | .624 | -1.144 | 1.402 |       |       |
|                       | Total      | 12.96 | 1.139 | 3.570 | .421 | .300   | 1.978 |       |       |
| MFI                   | Psychology | 29.66 | 3.571 | 3.056 | .817 | 1.807  | 5.336 | 4.551 | .103  |
| Mental Fatigue        | Nutrition  | 12.83 | 1.519 | 3.631 | .699 | .082   | 2.955 |       |       |
|                       | Combined   |       | 1.161 | 4.267 | .766 | -.404  | 2.726 |       |       |
|                       | Total      | 12.79 | 1.764 | 3.880 | .457 | .852   | 2.676 |       |       |
| CDC CFS               | Psychology |       | 1.429 | 3.736 | .998 | -.728  | 3.586 | 1.298 | .523  |
| Sore Throat           | Nutrition  | 56.23 | 1.185 | 2.661 | .512 | .133   | 2.238 |       |       |
|                       | Combined   |       | .500  | 4.591 | .825 | -1.184 | 2.184 |       |       |
|                       | Total      | 46.26 | .937  | 3.769 | .444 | .052   | 1.823 |       |       |
| CDC CFS Swollen Lymph | Psychology |       | -.143 | 2.932 | .784 | -1.835 | 1.550 | 0.462 | .794  |

|                                      |            |       |       |       |       |        |       |       |      |
|--------------------------------------|------------|-------|-------|-------|-------|--------|-------|-------|------|
| nodes Glands                         | Nutrition  | 10.09 | 1.247 | 2.700 | .520  | .179   | 2.316 |       |      |
|                                      | Combined   |       | .794  | 6.549 | 1.176 | -1.608 | 3.197 |       |      |
|                                      | Total      |       | .782  | 4.756 | .560  | -.336  | 1.900 |       |      |
| CDC CFS Diarrhoea                    | Psychology |       | -.286 | 1.490 | .398  | -1.146 | .575  | 3.619 | .164 |
|                                      | Nutrition  |       | .926  | 2.868 | .552  | -.209  | 2.060 |       |      |
|                                      | Combined   | 47.97 | 1.272 | 3.789 | .681  | -.118  | 2.662 |       |      |
|                                      | Total      | 42.47 | .839  | 3.134 | .369  | .103   | 1.576 |       |      |
| CDC CFS Fatigue after exertion       | Psychology |       | 2.286 | 4.811 | 1.286 | -.492  | 5.063 | 0.379 | .827 |
|                                      | Nutrition  | 13.90 | 2.593 | 5.507 | 1.060 | .414   | 4.771 |       |      |
|                                      | Combined   | 19.20 | 2.532 | 5.578 | 1.002 | -.486  | 4.578 |       |      |
|                                      | Total      | 16.32 | 2.507 | 5.339 | .629  | 1.252  | 3.761 |       |      |
| CDC CFS Muscle Aches or Muscle Pains | Psychology | 10.34 | 2.500 | 4.034 | 1.078 | .171   | 4.829 | 0.469 | .791 |
|                                      | Nutrition  | 20.56 | 2.333 | 3.637 | .700  | .894   | 3.772 |       |      |
|                                      | Combined   |       | 2.070 | 5.335 | .958  | .113   | 4.027 |       |      |
|                                      | Total      | 21.01 | 2.253 | 4.459 | .526  | 1.205  | 3.300 |       |      |
| CDC CFS Pain In Joints               | Psychology |       | 1.857 | 4.036 | 1.079 | -.473  | 4.187 | 0.054 | .973 |
|                                      | Nutrition  | 16.40 | 1.393 | 3.721 | .716  | -.079  | 2.865 |       |      |
|                                      | Combined   |       | 1.978 | 5.622 | 1.010 | -.084  | 4.040 |       |      |
|                                      | Total      | 28.32 | 1.735 | 4.634 | .546  | .646   | 2.824 |       |      |
| CDC CFS Fever                        | Psychology |       | -.214 | 1.968 | .526  | -1.351 | .922  | 0.399 | .819 |
|                                      | Nutrition  |       | .604  | 2.311 | .445  | -.310  | 1.519 |       |      |
|                                      | Combined   |       | 1.245 | 4.816 | .865  | -.521  | 3.012 |       |      |
|                                      | Total      |       | .721  | 3.573 | .421  | -.118  | 1.561 |       |      |
| CDC CFS Chills                       | Psychology | 23.40 | 1.571 | 2.738 | .732  | -.009  | 3.152 | 1.517 | .468 |
|                                      | Nutrition  | 40.74 | 2.148 | 3.097 | .596  | .923   | 3.373 |       |      |



|                                  |            |       |        |        |       |        |       |       |       |
|----------------------------------|------------|-------|--------|--------|-------|--------|-------|-------|-------|
|                                  | Combined   | 40.23 | 1.447  | 3.986  | .716  | -.015  | 2.909 |       |       |
|                                  | Total      | 37.00 | 1.734  | 3.421  | .403  | .930   | 2.538 |       |       |
| CDC CFS Unrefreshing Sleep       | Psychology |       | 1.857  | 6.803  | 1.818 | -2.071 | 5.785 | 0.160 | .948  |
|                                  | Nutrition  |       | 2.148  | 6.904  | 1.329 | -.583  | 4.879 |       |       |
|                                  | Combined   |       | 1.581  | 5.726  | 1.029 | -.520  | 3.681 |       |       |
|                                  | Total      | 19.55 | 1.847  | 6.3123 | .744  | .364   | 3.331 |       |       |
| CDC CFS Sleeping Problems        | Psychology |       | 2.786  | 5.352  | 1.430 | -.304  | 5.876 | 3.218 | .200  |
|                                  | Nutrition  |       | -.222  | 5.139  | .989  | -2.255 | 1.811 |       |       |
|                                  | Combined   |       | 1.762  | 4.871  | .875  | -.025  | 3.548 |       |       |
|                                  | Total      | 17.17 | 1.217  | 5.133  | .605  | .011   | 2.423 |       |       |
| CDC CFS Headaches                | Psychology |       | -.7143 | 2.091  | .559  | -1.922 | .493  | 6.625 | .036* |
|                                  | Nutrition  | 32.19 | 1.572  | 3.507  | .675  | .184   | 2.959 |       |       |
|                                  | Combined   | 36.18 | 2.467  | 4.944  | .888  | .653   | 4.280 |       |       |
|                                  | Total      | 29.32 | 1.512  | 4.124  | .486  | .543   | 2.482 |       |       |
| CDC CFS Memory Problems          | Psychology | 44.73 | 2.857  | 4.655  | 1.244 | .169   | 5.545 | 2.316 | .314  |
|                                  | Nutrition  |       | -.111  | 4.925  | .947  | -2.059 | 1.837 |       |       |
|                                  | Combined   |       | 1.949  | 6.011  | 1.080 | -.256  | 4.154 |       |       |
|                                  | Total      | 17.86 | 1.353  | 5.435  | .641  | .076   | 2.630 |       |       |
| CDC CFS Difficulty Concentrating | Psychology | 39.50 | 4.643  | 4.534  | 1.212 | 2.025  | 7.261 | 5.945 | .051  |
|                                  | Nutrition  |       | .815   | 4.359  | .839  | -.910  | 2.539 |       |       |
|                                  | Combined   |       | 2.170  | 5.877  | 1.056 | .015   | 4.326 |       |       |
|                                  | Total      | 26.66 | 2.143  | 5.217  | .615  | .917   | 3.369 |       |       |
| CDC CFS Nausea                   | Psychology |       | .143   | 2.770  | .740  | -1.456 | 1.742 | 4.773 | .092  |
|                                  | Nutrition  |       | .660   | 2.667  | .513  | -.395  | 1.716 |       |       |
|                                  | Combined   |       | .251   | 4.468  | .803  | -1.388 | 1.890 |       |       |

1  
2  
3  
4  
5  
6  
7  
8  
9  
10  
11  
12  
13  
14  
15  
16  
17  
18  
19  
20  
21  
22  
23  
24  
25  
26  
27  
28  
29  
30  
31  
32  
33  
34  
35  
36  
37  
38  
39  
40  
41  
42  
43  
44  
45  
46  
47  
48  
49

|                                              |            |       |        |        |       |       |        |       |      |
|----------------------------------------------|------------|-------|--------|--------|-------|-------|--------|-------|------|
|                                              | Total      |       | .384   | 3.535  | .417  | -.447 | 1.214  |       |      |
| CDC CFS Abdominal Pain                       | Psychology |       | .286   | 1.729  | .462  | -.713 | 1.284  | 1.082 | .582 |
|                                              | Nutrition  | 29.05 | .882   | 2.165  | .417  | .025  | 1.738  |       |      |
|                                              | Combined   |       | .839   | 4.390  | .789  | -.771 | 2.449  |       |      |
|                                              | Total      |       | .747   | 3.234  | .381  | -.013 | 1.507  |       |      |
| CDC CFS Sinus Nasal Symptoms                 | Psychology |       | .929   | 3.125  | .835  | -.876 | 2.733  | 1.255 | .534 |
|                                              | Nutrition  |       | 1.060  | 4.193  | .807  | -.599 | 2.719  |       |      |
|                                              | Combined   | 20.56 | 1.906  | 5.923  | 1.063 | -.267 | 4.078  |       |      |
|                                              | Total      | 14.95 | 1.399  | 4.822  | .568  | .266  | 2.532  |       |      |
| CDC CFS Shortness Of Breath                  | Psychology |       | 1.500  | 3.459  | .924  | -.497 | 3.497  | 0.707 | .702 |
|                                              | Nutrition  | 18.28 | .779   | 2.057  | .403  | -.052 | 1.609  |       |      |
|                                              | Combined   |       | .690   | 3.972  | .725  | -.793 | 2.173  |       |      |
|                                              | Total      | 29.08 | .885   | 3.243  | .388  | .112  | 1.658  |       |      |
| CDC CFS Sensitivity To Light                 | Psychology | 64.58 | 1.429  | 2.472  | .661  | .001  | 2.856  | 0.939 | .625 |
|                                              | Nutrition  |       | 1.568  | 3.764  | .725  | .079  | 3.057  |       |      |
|                                              | Combined   |       | .961   | 5.178  | .930  | -.938 | 2.860  |       |      |
|                                              | Total      | 26.26 | 1.280  | 4.209  | .496  | .291  | 2.269  |       |      |
| CDC CFS Depression                           | Psychology |       | 1.429  | 3.502  | .936  | -.593 | 3.451  | 0.490 | .783 |
|                                              | Nutrition  |       | .704   | 3.268  | .629  | -.589 | 1.996  |       |      |
|                                              | Combined   |       | 1.363  | 5.345  | .960  | -.598 | 3.323  |       |      |
|                                              | Total      | 39.55 | 1.129  | 4.282  | .505  | .122  | 2.135  |       |      |
| CDC CFS Maladaptive Stress Index Scale Score | Psychology | 16.75 | 16.286 | 13.234 | 3.537 | 8.645 | 23.927 | 4.379 | .112 |
|                                              | Nutrition  | 11.54 | 12.815 | 17.802 | 3.426 | 5.772 | 19.857 |       |      |
|                                              | Combined   | 10.98 | 9.613  | 26.424 | 4.746 | -.080 | 19.305 |       |      |
|                                              | Total      | 11.99 | 12.111 | 21.201 | 2.499 | 7.129 | 17.093 |       |      |

1  
2  
3  
4  
5  
6<sup>a</sup> see table 2 for descriptive and inferential statistics

7<sup>b</sup> *H*-statistic for Kruskal-Wallis test, d.f. = 2

8  
9 \* significant at the .05 level

10  
11  
12  
13  
14  
15  
16  
17  
18  
19  
20  
21  
22  
23  
24  
25  
26  
27  
28  
29  
30  
31  
32  
33  
34  
35  
36  
37  
38  
39  
40  
41  
42  
43  
44  
45  
46  
47  
48  
49

For peer review only

**STROBE 2007 (v4) checklist of items to be included in reports of observational studies in epidemiology\***  
**Checklist for cohort, case-control, and cross-sectional studies (combined)**

| Section/Topic             | Item # | Recommendation                                                                                                                                                                                                                                                                                                                                                                                                                                                         | Reported on page # |
|---------------------------|--------|------------------------------------------------------------------------------------------------------------------------------------------------------------------------------------------------------------------------------------------------------------------------------------------------------------------------------------------------------------------------------------------------------------------------------------------------------------------------|--------------------|
| Title and abstract        | 1      | (a) Indicate the study’s design with a commonly used term in the title or the abstract                                                                                                                                                                                                                                                                                                                                                                                 | Title and Abstract |
|                           |        | (b) Provide in the abstract an informative and balanced summary of what was done and what was found                                                                                                                                                                                                                                                                                                                                                                    | Title and Abstract |
| <b>Introduction</b>       |        |                                                                                                                                                                                                                                                                                                                                                                                                                                                                        |                    |
| Background/rationale      | 2      | Explain the scientific background and rationale for the investigation being reported                                                                                                                                                                                                                                                                                                                                                                                   | 1-4                |
| Objectives                | 3      | State specific objectives, including any pre-specified hypotheses                                                                                                                                                                                                                                                                                                                                                                                                      | 3-4                |
| <b>Methods</b>            |        |                                                                                                                                                                                                                                                                                                                                                                                                                                                                        |                    |
| Study design              | 4      | Present key elements of study design early in the paper                                                                                                                                                                                                                                                                                                                                                                                                                | 4                  |
| Setting                   | 5      | Describe the setting, locations, and relevant dates, including periods of recruitment, exposure, follow-up, and data collection                                                                                                                                                                                                                                                                                                                                        | 4                  |
| Participants              | 6      | (a) <i>Cohort study</i> —Give the eligibility criteria, and the sources and methods of selection of participants. Describe methods of follow-up<br><i>Case-control study</i> —Give the eligibility criteria, and the sources and methods of case ascertainment and control selection. Give the rationale for the choice of cases and controls<br><i>Cross-sectional study</i> —Give the eligibility criteria, and the sources and methods of selection of participants | 4                  |
|                           |        | (b) <i>Cohort study</i> —For matched studies, give matching criteria and number of exposed and unexposed<br><i>Case-control study</i> —For matched studies, give matching criteria and the number of controls per case                                                                                                                                                                                                                                                 |                    |
| Variables                 | 7      | Clearly define all outcomes, exposures, predictors, potential confounders, and effect modifiers. Give diagnostic criteria, if applicable                                                                                                                                                                                                                                                                                                                               | 6-7                |
| Data sources/ measurement | 8*     | For each variable of interest, give sources of data and details of methods of assessment (measurement). Describe comparability of assessment methods if there is more than one group                                                                                                                                                                                                                                                                                   | 6-7                |
| Bias                      | 9      | Describe any efforts to address potential sources of bias                                                                                                                                                                                                                                                                                                                                                                                                              | 14                 |
| Study size                | 10     | Explain how the study size was arrived at                                                                                                                                                                                                                                                                                                                                                                                                                              | 8                  |
| Quantitative variables    | 11     | Explain how quantitative variables were handled in the analyses. If applicable, describe which groupings were chosen and why                                                                                                                                                                                                                                                                                                                                           | 7                  |
| Statistical methods       | 12     | (a) Describe all statistical methods, including those used to control for confounding                                                                                                                                                                                                                                                                                                                                                                                  | 7                  |
|                           |        | (b) Describe any methods used to examine subgroups and interactions                                                                                                                                                                                                                                                                                                                                                                                                    | 7                  |
|                           |        | (c) Explain how missing data were addressed                                                                                                                                                                                                                                                                                                                                                                                                                            | 7                  |
|                           |        | (d) <i>Cohort study</i> —If applicable, explain how loss to follow-up was addressed<br><i>Case-control study</i> —If applicable, explain how matching of cases and controls was addressed                                                                                                                                                                                                                                                                              | 9-10               |

|                          |     |                                                                                                                                                                                                                                                                                                                                                                                                               |          |
|--------------------------|-----|---------------------------------------------------------------------------------------------------------------------------------------------------------------------------------------------------------------------------------------------------------------------------------------------------------------------------------------------------------------------------------------------------------------|----------|
|                          |     | <i>Cross-sectional study</i> —If applicable, describe analytical methods taking account of sampling strategy                                                                                                                                                                                                                                                                                                  |          |
|                          |     | (e) Describe any sensitivity analyses                                                                                                                                                                                                                                                                                                                                                                         |          |
| <b>Results</b>           |     |                                                                                                                                                                                                                                                                                                                                                                                                               |          |
| Participants             | 13* | (a) Report numbers of individuals at each stage of study—eg numbers potentially eligible, examined for eligibility, confirmed eligible, included in the study, completing follow-up, and analysed<br>(b) Give reasons for non-participation at each stage<br>(c) Consider use of a flow diagram                                                                                                               | 8-9      |
| Descriptive data         | 14* | (a) Give characteristics of study participants (eg demographic, clinical, social) and information on exposures and potential confounders<br>(b) Indicate number of participants with missing data for each variable of interest<br>(c) <i>Cohort study</i> —Summarise follow-up time (eg, average and total amount)                                                                                           | 8-9<br>9 |
| Outcome data             | 15* | <i>Cohort study</i> —Report numbers of outcome events or summary measures over time<br><i>Case-control study</i> —Report numbers in each exposure category, or summary measures of exposure<br><i>Cross-sectional study</i> —Report numbers of outcome events or summary measures                                                                                                                             | 6-7      |
| Main results             | 16  | (a) Give unadjusted estimates and, if applicable, confounder-adjusted estimates and their precision (eg, 95% confidence interval). Make clear which confounders were adjusted for and why they were included<br>(b) Report category boundaries when continuous variables were categorized<br>(c) If relevant, consider translating estimates of relative risk into absolute risk for a meaningful time period | 10-12    |
| Other analyses           | 17  | Report other analyses done—eg analyses of subgroups and interactions, and sensitivity analyses                                                                                                                                                                                                                                                                                                                |          |
| <b>Discussion</b>        |     |                                                                                                                                                                                                                                                                                                                                                                                                               |          |
| Key results              | 18  | Summarise key results with reference to study objectives                                                                                                                                                                                                                                                                                                                                                      | 12-13    |
| Limitations              | 19  | Discuss limitations of the study, taking into account sources of potential bias or imprecision. Discuss both direction and magnitude of any potential bias                                                                                                                                                                                                                                                    | 14-15    |
| Interpretation           | 20  | Give a cautious overall interpretation of results considering objectives, limitations, multiplicity of analyses, results from similar studies, and other relevant evidence                                                                                                                                                                                                                                    | 13-14    |
| Generalisability         | 21  | Discuss the generalisability (external validity) of the study results                                                                                                                                                                                                                                                                                                                                         | 14-15    |
| <b>Other information</b> |     |                                                                                                                                                                                                                                                                                                                                                                                                               |          |
| Funding                  | 22  | Give the source of funding and the role of the funders for the present study and, if applicable, for the original study on which the present article is based                                                                                                                                                                                                                                                 | 15       |

\*Give information separately for cases and controls in case-control studies and, if applicable, for exposed and unexposed groups in cohort and cross-sectional studies.

**Note:** An Explanation and Elaboration article discusses each checklist item and gives methodological background and published examples of transparent reporting. The STROBE checklist is best used in conjunction with this article (freely available on the Web sites of PLoS Medicine at <http://www.plosmedicine.org/>, Annals of Internal Medicine at <http://www.annals.org/>, and Epidemiology at <http://www.epidem.com/>). Information on the STROBE Initiative is available at [www.strobe-statement.org](http://www.strobe-statement.org).

# Please wait...

If this message is not eventually replaced by the proper contents of the document, your PDF viewer may not be able to display this type of document.

You can upgrade to the latest version of Adobe Reader for Windows®, Mac, or Linux® by visiting [http://www.adobe.com/go/reader\\_download](http://www.adobe.com/go/reader_download).

For more assistance with Adobe Reader visit <http://www.adobe.com/go/acrreader>.

Windows is either a registered trademark or a trademark of Microsoft Corporation in the United States and/or other countries. Mac is a trademark of Apple Inc., registered in the United States and other countries. Linux is the registered trademark of Linus Torvalds in the U.S. and other countries.

# Please wait...

If this message is not eventually replaced by the proper contents of the document, your PDF viewer may not be able to display this type of document.

You can upgrade to the latest version of Adobe Reader for Windows®, Mac, or Linux® by visiting [http://www.adobe.com/go/reader\\_download](http://www.adobe.com/go/reader_download).

For more assistance with Adobe Reader visit <http://www.adobe.com/go/acrreader>.

Windows is either a registered trademark or a trademark of Microsoft Corporation in the United States and/or other countries. Mac is a trademark of Apple Inc., registered in the United States and other countries. Linux is the registered trademark of Linus Torvalds in the U.S. and other countries.

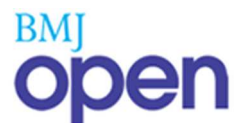

**A preliminary prospective study of the comparative effectiveness of nutritional, psychological and combined therapies for Myalgic Encephalomyelitis/Chronic Fatigue Syndrome (ME/CFS) in a private care setting.**

|                                 |                                                                                       |
|---------------------------------|---------------------------------------------------------------------------------------|
| Journal:                        | <i>BMJ Open</i>                                                                       |
| Manuscript ID:                  | bmjopen-2012-001079.R1                                                                |
| Article Type:                   | Research                                                                              |
| Date Submitted by the Author:   | 24-May-2012                                                                           |
| Complete List of Authors:       | Arroll, Megan; The Optimum Health Clinic,<br>Howard, Alex; The Optimum Health Clinic, |
| <b>Primary Subject Heading</b>: | Patient-centred medicine                                                              |
| Secondary Subject Heading:      | Complementary medicine, Nutrition and metabolism                                      |
| Keywords:                       | COMPLEMENTARY MEDICINE, SOCIAL MEDICINE, REHABILITATION MEDICINE                      |
|                                 |                                                                                       |

SCHOLARONE™  
Manuscripts



## Abstract

Background: Myalgic Encephalomyelitis/Chronic Fatigue Syndrome (ME/CFS) is a condition ~~characterised~~[characterized](#) by severe and persistent fatigue, neurological disturbances, autonomic and endocrine dysfunctions and sleep difficulties that have a pronounced and significant impact on individuals' lives. Current NICE guidelines within the United Kingdom suggest that this condition should be treated with cognitive ~~behavioural~~[behavioral](#) therapy and/or graded exercise therapy where appropriate. There is currently a lack of evidence base concerning other, more integrative interventions that may be beneficial to those with ME/CFS.

Objectives: This study aimed to evaluate whether three patient-centered treatment modalities of psychology, nutrition and combined treatment, [influenced symptom report measures in those with reduced symptomatology](#) of ME/CFS over a 3-month time period and whether there were significant differences in these changes between groups.

Design and setting: This is a ~~preliminary prospective longitudinal observational~~ study [with one follow-up point](#) conducted at ~~a one~~ private secondary health care facility in London, UK.

Participants: One-hundred and thirty-eight individuals (110 females, 79.7%; 42 participants in psychology, 44 in nutrition and 52 in combined) participated at baseline and 72 participants completed the battery of measures at follow-up (52.17% response rate; 14, 27, 31 participants in each group, respectively).

Outcome measures: Self-report measures of ME/CFS symptoms, functional ability, multidimensional fatigue, perceived control and maladaptive stress.

Results: Baseline comparisons showed those in the combined group had higher levels of fatigue. At follow-up, all groups saw improvements in fatigue, functional physical symptomatology and maladaptive stress; those within the psychology group also experienced a shift in perceived control over time. ~~The psychology group demonstrated a significantly greater change in fatigue and perceived control than the combined group; however, the opposite relationship was observed for headaches.~~

Conclusions: ~~This study provides early evidence that p~~ Patient-centered techniques for the treatment of ME/CFS ~~may influence appear promising in reducing~~ symptomatology, fatigue, ~~function, perceived control~~ and inappropriate responses to stressors, ~~and increasing function and perceived control~~. However, these results must be viewed with caution as the allocation to groups was not randomized, there was no control group and the study suffered from high drop-out rates. ~~The need for further studies of integrative treatment with robust designs appears warranted.~~

## Summary

### Article focus

- This ~~preliminary prospective observational~~ study investigated three (psychological, nutritional and combined) tailored patient-centered interventions for ME/CFS over time.
- Differences between the reported changes over time between groups were also assessed.

### Key messages

- Patient-centered approaches for the management of ME/CFS ~~reduce~~ ~~symptomatology influence symptomatology~~ over time ~~in some individuals with this disorder~~.
- ~~Self-reported f~~ Functional ability, ~~(-physical and social), are influenced increase with~~ following tailored interventions ~~lasting 3 months-~~
- ~~Psychological intervention can help individuals to regain a sense of control over their condition-~~
  - ~~This study provides preliminary evidence that tailored psychological, nutritional and~~ ~~Combined interventions may be effective treatments for some people with ME/CFS; however~~ ~~due to the study's methodological limitations, it is important that this potential treatment~~ ~~effect is investigated further in high quality randomized controlled studies.~~

### Strengths and limitations of this study

Formatted: Font: Not Bold, No underline

Formatted: Font: Not Bold, No underline

Formatted: List Paragraph, Bulleted + Level: 1 + Aligned at: 0.25" + Indent at: 0.5"

Formatted: Font: Not Bold, No underline

- The findings here are an initial step to fill the gap in the extant literature regarding the utility of tailored, multidisciplinary and patient-centered treatments for ME/CFS.
- There is bias in this study as the participants were self-selected in the sense that they chose to attend the clinic and which treatment option they preferred (with advice), i.e. the study was not randomized.
  - There were low retention rates in this study which may constitute a bias in that those who remained in the study may have experienced benefits and those who experienced little or no benefits may have dropped out.

Formatted: List Paragraph, Bulleted + Level: 1 + Aligned at: 0.25" + Indent at: 0.5"

### **Introduction**

Chronic Fatigue Syndrome or myalgic encephalomyelitis (ME/CFS) is a condition characterized by prolonged and debilitating fatigue, although the exact cause of this disorder is still under debate. Due to the lack of a definitive biological marker, diagnosis is made on the basis of the exclusion of other explanatory conditions. The most widely used case definition by the Centers for Disease Control <sup>1</sup> states that there must be at least six months severe fatigue of new and definite onset, not the result of ongoing exertion, not alleviated by rest and resulting in reduced levels of physical activity. The CDC definition also sets out a series of minor complaints that must accompany the fatigue (cognitive impairment, sore throat, tender cervical or axillary lymph nodes, muscle pain, multi-joint pain, headaches of a new type, pattern or severity at onset, unrefreshing sleep and post-exertion malaise), with individuals needing to have the occurrence of four or more symptoms to be diagnosed with

1  
2  
3  
4  
5  
6  
7 ME/CFS. Estimates of the prevalence of ME/CFS have been made as low as 3 and as high as  
8  
9 2,800 per 100,000 <sup>2</sup>.

10  
11  
12 The most widely researched strategies for alleviating the symptoms of ME/CFS are Cognitive  
13  
14 Behavior Therapy (CBT) and Graded Exercise Therapy (GET). Two reviews of studies on  
15  
16 CBT <sup>3,4</sup> found that it significantly improved physical functioning in adult out-patients as  
17  
18 compared with medical management, counseling, guided support, education and support or  
19  
20 relaxation. ~~However, the longitudinal evidence for CBT is inconsistent and there is a lack of~~  
21  
22 ~~evidence with regard to CBT in combination with other treatments~~<sup>4</sup>. Regarding GET, a  
23  
24 systematic review illustrated that this form of therapy was potentially beneficial for people  
25  
26 with ME/CFS, especially when combined with a patient education programme<sup>5</sup>. However,  
27  
28 drop-out rates were high in the GET groups suggesting that individuals with ME/CFS are  
29  
30 adverse to this type of therapy. Recently, a large scale, longitudinal study investigating CBT,  
31  
32 GET, Adaptive Pacing Therapy (APT) and specialist medical care (SMC) found that CBT  
33  
34 and GET (when added to SMC) were moderately effective outpatient treatments for this  
35  
36 patient group as opposed to APT or SMC alone <sup>6</sup>.

37  
38  
39 Although CBT and GET studies have shown some promising outcomes, there is no known  
40  
41 cure for ME/CFS. Therefore the National Institute for Health and Clinical Excellence (NICE)  
42  
43 <sup>7,6</sup> recommends a number of symptom management strategies and interventions aimed at  
44  
45 helping individuals to cope with their condition and reduce physical deconditioning brought  
46  
47 about by the illness. Pharmacological interventions are, at times, suggested for patients with  
48  
49 poor sleep or pain, for instance, low-dose antidepressants, as these have been shown to be  
50  
51 effective <sup>8-14,13</sup>. However, patient expectations must be realistic as the drugs may help  
52  
53 elevate mood and psychological outlook but not reduce fatigue and other symptomatology  
54  
55  
56  
57  
58  
59  
60

1  
2  
3  
4  
5  
6 associated with ME/CFS<sup>1514</sup>. Numerous drugs such as thyroxin, hydrocortisone and antiviral  
7 agents are not advised by NICE due to contradictory findings<sup>16:1715;16</sup>.  
8  
9

10  
11  
12 In terms of function and quality of life management, NICE offers general advice concerning  
13 sleep management, appropriate rest periods, and pacing. Sleep hygiene instruction, together  
14 with pharmacological treatment tailored to the individual patient can be beneficial in  
15 combating fatigue<sup>1817</sup>. Dietary management may also reduce symptomatology for those with  
16 concurrent irritable bowel syndrome (IBS). Management approaches recommended for IBS,  
17 such as diet restriction, are thus also recommended for those with ME/CFS<sup>1918</sup>. Dietary  
18 supplementation has been investigated in relation to ME/CFS. Fatty acids<sup>2019</sup>, folic acid<sup>2120</sup>,  
19 vitamin C<sup>2221</sup>, co-enzyme Q10<sup>2322</sup>, magnesium<sup>2423</sup>, multivitamins<sup>2524</sup> and minerals<sup>2625</sup> have  
20 all been shown to reduce symptomatology in ME/CFS patients. However other studies have  
21 shown conflicting findings with regard to nutritional supplementation, therefore it is perhaps  
22 wise to treat with supplements on a case-by-case basis<sup>27:2826;27</sup>.  
23  
24  
25  
26  
27  
28  
29  
30  
31  
32  
33

34  
35 Due to the lack of clear and definitive treatment strategies, individuals often seek out  
36 Complementary and Alternative Medicines (CAM). Although NICE does not recommend the  
37 use of CAM they do acknowledge that many people with ME/CFS use such therapies and  
38 find them beneficial for symptom management. This view is due to the lack of published  
39 evidence for the effectiveness of these treatments. Examples of CAM treatments used by  
40 individuals with ME/CFS include religious healing, massage therapy, relaxation, meditation,  
41 homeopathy, acupuncture, naturopathy and herbal therapies<sup>29:3028;29</sup>; patient satisfaction with  
42 such approaches as CAM has been high, over 80% in some instances<sup>2928</sup>. A recent systematic  
43 review of such interventions identified 70 controlled clinical trials (randomized and non-  
44 randomized) and found that 86% of these studies illustrated at least one positive effect, with  
45  
46  
47  
48  
49  
50  
51  
52  
53  
54  
55  
56  
57  
58  
59  
60

1  
2  
3  
4  
5  
6  
7 74% showing a decrease of illness-related symptomatology <sup>3130</sup>. Meditative or mindfulness  
8 approaches warranted further investigation based on these results as did supplement programs  
9 of magnesium, l-carnitine, and S-adenosylmethionine. A subsequent review based solely on  
10 randomized controlled trials (RCTs) of CAM techniques identified 26 such studies and  
11 observed that qigong, massage and tuina (approaches based within Chinese Traditional  
12 Medicine and based upon relaxation and connection with the body) illustrated positive effects  
13 as did supplementation studies utilizing nicotinamide adenine dinucleotide (NADH) and  
14 magnesium <sup>3234</sup>. However, within both reviews it was noted that the methodological quality  
15 of reporting was poor and the sample sizes in these studies were small; hence ability to draw  
16 strong conclusions on the efficacy of CAM methods is limited. Porter et al. (2010) <sup>31</sup> did note  
17 that patient-centered, individualized treatment protocols which include a range of tailored  
18 strategies are a promising area for further investigation for this complex, multi-system illness.  
19  
20  
21  
22  
23  
24  
25  
26  
27  
28  
29  
30  
31  
32  
33  
34

### 35 Objectives

36  
37 There is still much debate and uncertainty regarding the most effective treatment for  
38 ME/CFS. Recent reviews of CAM techniques highlight the need for further exploration of  
39 patient-centered and individually tailored interventions for the alleviation of the condition's  
40 often debilitating and intrusive symptomatology. This study therefore aims to provide  
41 preliminary evidence for the utility ~~evaluate the effectiveness of three of three~~ types of  
42 patient-centered approaches to the management of ME/CFS over time (baseline and follow-  
43 up) offered at a private health-care center in the UK.  
44  
45  
46  
47  
48  
49  
50

### 51 Methods

52  
53  
54  
55  
56  
57  
58  
59  
60

### Study design and setting

This ~~preliminary prospective a longitudinal observational~~ study ~~which~~ aimed to [explore the effectiveness of evaluate](#) three treatment options offered to individuals with ME/CFS. The research was conducted at one private secondary health care facility. All ~~potential prospective~~ patients of the clinic are first asked to complete a comprehensive symptom profile and medical history, including questions relating to triggering factors, psychology sub-types and structural/biological sub-types (this is distinct from the research data collected). Subsequent to this, every individual receives a 15-minute screening with one of the practitioners ([please note, this was not either of the authors of the current study](#)) who recommends the best course of action for his/her needs; this will be the psychology-related interventions, nutritional advice and support or a combination of the two.

All individuals requesting treatment at the private care setting were offered the opportunity to participate in the study. Those that expressed an interest ([N = 145](#)) were emailed a spreadsheet that contained the questionnaires and asked to complete it at their convenience. Informed consent was obtained prior to the completion of the questionnaires and the study was approved by the University of East London Ethics Committee. Participants were told that they could withdraw from the study at any time and that withdrawal would not affect their care at the clinic. Participants were able to ask questions at any point in the study and no deception was used as the participants were informed of the nature of the research program before they agreed to participate. [Subsequently, participants were requested to complete the questionnaire pack on a second occasion, three months from the baseline measures.](#)

### *Psychology*

1  
2  
3  
4  
5  
6  
7 The clinic offers a 3-month intervention which consists of a combination of Neuro-linguistic  
8 Programming (NLP), Emotional Freedom Technique (EFT), life coaching and  
9 hypnotherapy/self-hypnosis constructed in a manner specific to the needs of those with  
10 ME/CFS. The primary aim of this approach is to reduce the anxiety that is associated with  
11 having a debilitating and unpredictable condition, improve emotional well-being and help  
12 individuals slowly manage and increase their activity within their own limits (i.e. pacing).  
13  
14 The program is offered as a series of group sessions and the peer support is seen as an  
15 important component of the intervention, which is solidified via the use of moderated online  
16 support forums, narratives of previous clients' experiences and online materials that can be  
17 accessed as often as necessary. In addition to, or as an alternative to this course, individuals  
18 receive a series of one-to-one sessions and for the most severely affected ME/CFS patients,  
19 telephone sessions are arranged and support materials can be accessed in their own homes.

20  
21  
22 Over the three-month period of this preliminary study, the participants experienced one of  
23 three treatment options. The first option included 13 hours of practitioner contact time in a  
24 mix of group training in person, group telephone conference calls and one-to-one telephone  
25 sessions, the second option was four hours of one-to-one telephone sessions and the final  
26 option was three hours of in person sessions. Participants all had access to various support  
27 materials which included CDs and online resources. The amount of time spent on these was  
28 patient-led, but was in the region of a further six hours. All the practitioners offering this  
29 option are qualified in hypnotherapy, NLP, life coaching and EFT and undergo an intensive  
30 period of training in the clinic's own integrative approach (please see Howard and Arroll <sup>33</sup>  
31 for more details of this approach) and ongoing supervision (individual and group supervision  
32 on a biweekly basis) from the department director, who is the only senior practitioner in the  
33 team.



### *Nutrition*

Tailored nutritional therapy is achieved via one-to-one consultations with individuals. To begin, a very detailed history is taken based upon the information given in the aforementioned symptom profile. Qualified nutritional therapists (who have been given specialist training regarding ME/CFS from the clinic) then suggest tests consistent with symptomatology, for instance the Adrenal Stress Index Test, comprehensive stool analysis/gastro-intestinal function, vitamin & mineral status, etc. Results from these tests are then used to compose an evidence-driven diet and supplement program. As most cases of ME/CFS are complex involving multiple body systems, this process is often iterative and follow-up consultations are necessary to check progress and make alterations to the protocol.

The nutritional therapy program consists of an initial one-hour evaluation (which includes the tailored advice) and follow-up approximately every six weeks; therefore, during the course of the present study, the participants received a minimum of two one-hour sessions with email support for any queries and detailed nutritional guidance. All the nutritional therapists are qualified to diploma level and members of (voluntary) regulatory bodies such as the British Association for Applied Nutrition and Nutritional Therapy (BANT) and the Complementary and Natural Healthcare Council (CNHC). Similar to the psychology department, the nutrition department is led by one senior practitioner who supervises the team with individual and group supervisory arrangements.

### *Combined*

1  
2  
3  
4  
5  
6  
7 Within the combined program, a multidisciplinary approach is taken with practitioners  
8 discussing the patients in case meetings to ensure that the psychological and nutritional  
9 aspects complement each other in order to achieve the best outcome. [It should be noted that](#)  
10 [the interventions in the combined program are phased-in as it was found that asking](#)  
11 [individuals to engage in numerous therapeutic activities at the same time resulted in high](#)  
12 [drop-out rates.](#)  
13  
14  
15  
16  
17  
18  
19

### 20 **[Primary Outcome Measures](#)**

#### 21 *Medical Outcomes Survey Short-Form 36 (SF-36)*

22 This 36-item measure is the short form of the original Medical Outcomes Survey [3432](#) to  
23 measure functional impairment and contains eight sub-sections: 1) physical activity  
24 limitations due to health problems; 2) social activity limitations due to physical or emotional  
25 problems; 3) usual role activity limitations due to physical health problems; 4) bodily pain; 5)  
26 general mental health; 6) role activity limitations due to emotional problems; 7) vitality  
27 (energy and fatigue); and 8) general health perceptions [3432](#). The items are scored so that  
28 higher scores indicate greater functional ability. In terms of the psychometric properties of  
29 this measure, reliability estimates for all sub-scales are good, exceeding a Cronbach's alpha  
30 coefficient value of 0.70 [3533](#). In terms of validity, the SF-36 correlates amply,  $r \geq 0.40$ , with  
31 the frequency and severity of numerous symptoms and general health conditions [36:37,34:35](#).  
32  
33  
34  
35  
36  
37  
38  
39  
40  
41  
42  
43  
44  
45  
46  
47  
48

#### 49 *Multidimensional Health Locus of Control Scale (MHLCS)*

50 [Multidimensional Health Locus of Control](#) <sup>36-38</sup> ~~measures perceived control via three distinct~~  
51 ~~sub-scales: 'internal', 'chance' and 'powerful others' which has two dimensions, that of~~  
52  
53  
54  
55  
56  
57  
58  
59  
60

~~'doctors' and 'other people'. The instrument contains 18 items in total (six items each for the internal and chance scales and three items for both the powerful others scales) and is scored on a 6 point Likert scale from 'strongly agree' to 'strongly disagree'. Internal reliability of the instrument is good with Cronbach's alpha coefficients ranging from 0.67 for 'powerful others' to 0.77 for 'internal'. The measure correlates positively and significantly with associated scales from Levenson's<sup>39</sup> locus of control measure from which the MHLOC was based upon, which demonstrates good convergent validity<sup>36</sup>.~~

### *Multidimensional Fatigue Inventory (MFI)*

This 20-item measure contains five fatigue dimensions: general fatigue, physical fatigue, mental fatigue, reduced motivation and reduced activity<sup>38,40</sup>. Items such as 'I tire easily' are rated on a 5-point scale (1 = yes, that is true; 5 = no, that is not true) with lower scores reflecting higher levels of fatigue. The MFI has good internal consistency with average Cronbach's alpha coefficient equaling 0.84 across the sub-scales. Convergent validity based on a sample of radiotherapy patients found correlations between the sub-scales and a visual analog fatigue scale to be 0.77 for general fatigue, 0.70 for physical fatigue, 0.61 for reduced activity, 0.56 for reduced motivation ( $p < 0.001$ ) to 0.23 for mental fatigue ( $p < 0.01$ )<sup>38,40</sup>.

### Secondary Outcome Measures (ME/CFS-specific)

#### *CDC CFS Symptom Inventory*

CDC CFS Symptom Inventory<sup>39,41</sup> was used to measure specific ME/CFS symptoms and confirm diagnosis. This instrument is based upon the CDC case definition<sup>1</sup> and includes a fatigue item and the eight distinct symptoms are also included in the CDC guidelines with an additional ten associated symptoms. The format of this self-report measure is a six-point scale of perceived frequency (0 = absent, 5 = all the time) and severity (0 = none, 5 = very severe). The psychometric properties of this instrument are good: Cronbach's alpha coefficient = 0.88;

Formatted: Superscript

Formatted: Font: Bold

1  
2  
3  
4  
5  
6  
7  
8  
9  
10  
11  
12  
13  
14  
15  
16  
17  
18  
19  
20  
21  
22  
23  
24  
25  
26  
27  
28  
29  
30  
31  
32  
33  
34  
35  
36  
37  
38  
39  
40  
41  
42  
43  
44  
45  
46  
47  
48  
49  
50  
51  
52  
53  
54  
55  
56  
57  
58  
59  
60

$r = .74$  convergent validity with the Chalder Fatigue Scale <sup>40,42</sup>;  $r = -.68$  and  $-.87$  convergent validity with the SF-36 'vitality' and 'bodily pain' sub-scales, respectively.

### **Secondary Outcome Measures (psychological)**

Formatted: Font: Bold

#### *Multidimensional Health Locus of Control Scale (MHLCS)*

Formatted: Font: Italic

Multidimensional Health Locus of Control <sup>41-43</sup> measures perceived control via three distinct sub-scales: 'internal', 'chance' and 'powerful others' which has two dimensions, that of 'doctors' and 'other people'. The instrument contains 18 items in total (six items each for the 'internal' and 'chance' scales and three items for both the 'powerful others' scales) and is scored on a 6-point Likert scale from 'strongly agree' to 'strongly disagree'. Internal reliability of the instrument is good with Cronbach's alpha coefficients ranging from 0.67 for 'powerful others' to 0.77 for 'internal'. The measure correlates positively and significantly with associated scales from Levenson's <sup>44</sup> locus of control measure from which the MHLOC was based, which demonstrates good convergent validity <sup>41</sup>.

#### *Maladaptive Stress Index*

This 32-item measure contains three sub-scales (cognitive/mood, sleep and ME/CFS symptoms) and was designed specifically for this population <sup>45,43</sup>. Items such as 'I constantly replay or pre-empt situations and conversations' are scored on a 5-point scale where 1 = never true and 5 = always true; higher scores illustrate a greater degree of disturbance.

### **Statistical methods**

The data was initially screened for missing data. Four cases contained substantial amounts of missing data; therefore these were excluded from the analysis (one individual from the nutrition group and three from the combined group). Once this was done, all the variables had

1  
2  
3  
4  
5  
6 less than 5% missing data, hence mean substitution was carried out in line with guidance <sup>4644</sup> .  
7  
8  
9 The baseline data was subsequently of the quality for parametric tests, except for the  
10 variables CDC CFS swollen lymph nodes and glands, memory problems, abdominal pain and  
11 depression. However, the follow-up data suffered from high levels of skew and kurtosis  
12 which was not substantially alleviated by data transformation. This violated a key criterion  
13 for parametric testing, that of normality of distribution, so non-parametric tests were selected.  
14  
15 In addition, as the sample sizes in each individual treatment group were small, the more  
16 conservative non-parametric tests were the preferred choice as even though tests such as  
17 analysis of variance are generally robust against non-normality, this does not hold true with  
18 small sample sizes. ~~For baseline data, One-way analysis of variance tests and Kruskal-~~  
19  
20 ~~Wallis tests (the former for those variables that met the criteria for parametric tests, and the~~  
21 ~~latter that did not) were used to investigate baseline variation difference between groups;~~  
22 ~~Wilcoxon sign rank tests were employed to look for differences over time (baseline and 3-~~  
23 ~~month follow-up) and multivariate analysis of covariance (MANCOVA) tests were used to~~  
24 ~~account for this variation and test to for differences between the three groups. Kruskal-~~  
25 ~~Wallis tests were performed to investigate group differences in measures of change as~~  
26 ~~evaluated by mean change scores, with Bonferroni corrected Mann Whitney tests calculated~~  
27 ~~to identify post hoc differences between groups if the Kruskal Wallis tests were significant.~~  
28 ~~Wilcoxon sign-rank tests were employed to look for differences over time (baseline and 3-~~  
29 ~~month follow-up) and if differences were significant, percentage change was calculated.~~  
30  
31 ~~Please note, as this is an exploratory study with only one time-point and no control group,~~  
32 ~~any significant findings do not infer clinical significance, rather statistical significance, and as~~  
33 ~~such exact p-values are presented.~~  
34  
35  
36  
37  
38  
39  
40  
41  
42  
43  
44  
45  
46  
47  
48  
49  
50

## 51 52 53 **Results** 54 55 56 57 58 59 60

## Participants

Of the 145 individuals who expressed an interest in the study, 142 time-one questionnaires were returned, equating to a 97.9% response rate at baseline (two participants from the psychology group and one from the combined group dropped out at this stage). Therefore, excluding the four cases deleted due to insufficient data, 138 ~~One hundred and thirty eight cases were used for baseline analysis; individuals completed the questionnaire battery at time one (excluding the four deleted cases);~~ 42 participants in the psychology group, 44 in the nutrition group and 52 in the combined group. There was no significant association between gender and group ( $\chi^2(2) = 0.179, p = .915 > .05$ ), all groups consisting of approximately one-fifth males (Table 1). There was not a significant difference in age ( $F(2,135) = 0.0010, p = 1.000 > .05$ ); in fact group means for age were near identical at 42.881, 42.864 and 42.843 for psychology, nutrition and combined groups, respectively. There was also a non-significant result for illness duration ( $F(2, 135) = 0.252, p = .778 > .05$ ). Therefore, in terms of demographics, the groups were comparable. With regard to the outcome measures, there were significant differences between the groups in terms of the MFI sub-scale 'general fatigue' ( $F(2, 135) = 3.219, p = .043 < .05$ ), MFI 'physical fatigue' ( $F(2, 135) = 3.343, p = .038 < .05$ ) and the CDC CFS symptom 'swollen lymph nodes and glands' ( $H(2) = 7.161, p = .028 < .05$ ). To investigate the source of these differences, post-hoc tests were conducted (unrelated t-tests for the fatigue variables and Mann-Whitney tests for swollen lymph glands as the former did not meet criteria for parametric tests, all with Bonferroni correction for multiple comparisons). A significant difference was observed between the psychology and combined groups with regards to general fatigue ( $t(92) = -2.449, p = .016 < .05$ ) and physical fatigue ( $t(92) = -2.658, p = .009 < .05$ ) and also between the nutrition and psychology group in terms of the degree of lymph node and gland swelling ( $U = 635.00, p = .009 < .05$ ). Within the fatigue measures, the combined group reported

Formatted: Font: Not Italic

Formatted: Font: Not Italic

Formatted: Font: Not Italic

1  
2  
3  
4  
5  
6  
7 significantly higher levels of both general and physical fatigued than the psychology group  
8  
9 whereas those undertaking nutritional support stated a higher occurrence of swollen lymph  
10  
11 nodes and glands.

#### 12 13 14 *Retention analysis*

15  
16 Seventy-two of the original 138 participants ([14 participants in the psychology group, 27 in](#)  
17  
18 [the nutrition group and 31 in the combined group](#)) completed the battery of measures at the 3-  
19  
20 month follow-up, [resulting in retention rates of \(52.17% in the study overall, 33.33% in the](#)  
21  
22 [psychology group, 61.36% in the nutrition group and 59.62% in the combined group](#)). To  
23  
24 investigate whether the individuals who did not complete the time-two measures were  
25  
26 significantly different from those at baseline on demographic and outcome measures, a series  
27  
28 of t-tests and Mann-Whitney tests were performed. Those that dropped out of the research  
29  
30 (although still receiving treatment at the clinic) differed significantly in terms of age ( $t(136) =$   
31  
32  $-2.227, p = .028 < .05$ ) and illness duration ( $t(136) = -2.549, p = .012 < .05$ ). Those who  
33  
34 remained in the study were of significantly older age (mean age of those that remained in the  
35  
36 study = 45.056, SD = 11.535; mean age of drop-outs = 40.400, SD = 12.932) and longer  
37  
38 illness duration than those who dropped out (mean age of those that remained in the study =  
39  
40 10.836, SD = 7.383; mean illness duration of drop-outs = 7.571, SD = 7.472). Individuals who  
41  
42 did not remain in the study did not differ significantly in terms of gender ( $\chi^2(2) = 1.222, p =$   
43  
44 [.269 > .05](#)) or any of the outcome measures.

#### 45 46 47 Longitudinal data Comparison from time-one to time-two

##### 48 49 Primary outcomes

50  
51 [The following percentage change scores represent statistically significant changes, rather than](#)  
52  
53 [clinically significant shifts, as this was an exploratory study. \(Please see Table 2 for the exact](#)  
54  
55  
56  
57  
58  
59  
60

Formatted: Font: Italic

1  
2  
3  
4  
5  
6  
7 p-value for each repeated measures comparison.) In the sample as a whole, there were  
8 improvements in all areas of the SF-36, with a 5.80% improvement in physical functioning, a  
9 63.32% improvement in role limitations due to physical difficulties, a 5.17% improvement in  
10 bodily pain, a 26.17% improvement in social functioning, a 10.58% improvement in role  
11 limitations due to emotional difficulties, a 22.30% improvement in vitality, energy or fatigue  
12 and a 36.49% improvement in general health perception. When looking at the fatigue sub-  
13 scales of the MFI, all five sub-scales showed significant reductions in fatigue; 8.55% in  
14 general fatigue, 10.98% in physical fatigue, 8.81% in reduced activity, 12.96% in reduced  
15 motivation and 12.79% in mental fatigue.

16  
17  
18  
19  
20  
21  
22  
23  
24  
25  
26 Within the group of individuals who opted for a purely psychological intervention,  
27 improvements were seen in physical functioning (16.75%), role limitations due to physical  
28 problems (84.61%), social functioning (37.81%), general mental health (19.15%), vitality,  
29 energy or fatigue (49.57%) and general health perceptions (19.01%). Also, all the MFI  
30 fatigue scales decreased over a 3-month period, 13.58% in general fatigue, 17.74% in  
31 physical fatigue, 23.20% in reduced activity, 11.42% in reduced motivation and 29.66% in  
32 mental fatigue.

33  
34  
35  
36  
37  
38  
39  
40  
41 The nutrition group saw improvements in role limitations due to physical problems (61.05%),  
42 social functioning (24.93%), vitality, energy or fatigue (35.35%). and general health  
43 perceptions (29.73%). Once again, all the MFI fatigue scales decreased over a 3-month  
44 period, 13.39% in general fatigue, 15.00% in physical fatigue, 13.28% in reduced activity,  
45 14.64% in reduced motivation and 12.83% in mental fatigue.



1  
2  
3  
4  
5  
6  
7 In terms of general health as evaluated by the SF-36 measure, the group who received both  
8 psychological and nutritional intervention reported reductions in role limitations due to  
9 physical difficulties (57.02%), social functioning (22.61%), role limitations due to emotional  
10 difficulties (29.47%) and general health perceptions (26.45%). In the combined group, only  
11 one measure of fatigue, that of physical fatigue, saw significant improvements over time  
12 (6.42%).

13  
14  
15  
16  
17  
18  
19  
20 *Secondary outcomes (ME/CFS-specific)*

Formatted: Font: Italic

21  
22 Within the CFS Symptom Inventory, there were improvements in occurrence of sore throats  
23 (46.26%), diarrhea (42.47%), fatigue after exertion (16.32%), muscle aches or muscle pains  
24 (21.01%), pain in joints (28.32%) chills (37.00%), unrefreshing sleep (19.55%), sleeping  
25 problems (17.17%), headaches (29.47%), memory problems (17.86%), difficulty  
26 concentrating (26.66%), sinus and nasal symptoms (14.95%), shortness of breath (29.08%),  
27 sensitivity to light (26.26%) and depression (39.55%) in the merged sample. Within those  
28 taking part in the psychology intervention, ratings of muscle aches or muscle pains (10.34%),  
29 chills (23.40%), memory problems (44.73%), difficulty concentrating (39.50%) and  
30 sensitivity to light (64.58%) decreased. In the nutrition group, numerous symptom-related  
31 indices also showed improvements; sore throat (56.23%), swollen lymph glands (10.09%),  
32 fatigue after exertion (13.90%), muscle aches or muscle pains (20.56%), pain in joints  
33 (16.40%), chills (40.74%), headaches (32.19%), abdominal pain (29.05%), and sensitivity to  
34 light (18.28%). Those in the combined group saw significant reductions over the 3-month  
35 interval in diarrhea (47.97%), fatigue after exertion (19.20%), chills (40.23%), headaches  
36 (36.18%) and sinus and nasal symptoms (20.56%). (Please see Table 3 for the descriptive and  
37 inferential statistics associated with these findings and the exact p-value for each repeated  
38 measures comparison.)

39  
40  
41  
42  
43  
44  
45  
46  
47  
48  
49  
50  
51  
52  
53  
54  
55  
56  
57  
58  
59  
60

Secondary outcomes (psychological)

Formatted: Font: Italic

There were no significant differences from time-one to time-two in the MHLCS sub-scale of 'chance', 'powerful others' and 'other people', however the MHLCS did illustrate significant increases in internal locus of control (30.67%) and that of doctors (47.49%) in the sample as a whole. Reductions were also observed in the Maladaptive Stress Response (11.99%) in the entire group. In the psychology group, a significant increase of 17.56% was observed in internal locus of control, a decrease of 4.67% in the perception that chance played an influential part in the individuals' lives and a significant reduction in the Maladaptive Stress Response of 16.75%. No significant differences were found from baseline to follow-up in perceived control in the nutrition group, however the way in which the individuals in this group responded to stress also decreased, by 11.54%. No significant differences were found from baseline to follow-up in perceived control as measured by the MHLCS in the combined treatment group although there was a statistically significant difference in the Maladaptive Stress Response (10.98%). (Please see Table 4 for the descriptive and inferential statistics associated with these findings and the exact p-value for each repeated measures comparison.)

Formatted: Font: Not Bold

In the sample as a whole, there were significant differences from baseline to follow up within the internal and doctors sub-scale of the MHLCS and all the CDC-CFS Symptom Inventory items bar swollen lymph nodes and glands, fever and abdominal pain. There were also significant differences in all areas of the SF-36, all the fatigue sub-scales of the MFI with the five sub-scales illustrating significant reductions in fatigue and, finally, reductions were also observed in the Maladaptive Stress Response.

Within the psychology group significant differences were also found in the SF-36 sub-scales 'physical functioning', 'role limitations due to physical problem', 'social functioning',

1  
2  
3  
4  
5  
6  
7 ~~'general mental health', 'vitality, energy or fatigue' and 'general health perceptions'.~~  
8 ~~Regarding perceived control, significant differences were found in internal locus of control~~  
9 ~~and the perception that chance played an influential part in the individuals' lives. Again, all~~  
10 ~~the MFI fatigue scales saw significant decreases over a 3 month period. Regarding ME/CFS~~  
11 ~~specific symptoms, ratings of muscle aches or muscle pains, chills, memory problems,~~  
12 ~~difficulty concentrating and sensitivity to light differed significantly from baseline to follow-~~  
13 ~~up in the expected direction. There was also a significant reduction in the Maladaptive Stress~~  
14 ~~Response over time.~~

15  
16  
17  
18  
19  
20  
21  
22  
23  
24 ~~The nutrition group saw significant improvements in role limitations due to physical~~  
25 ~~problems, social functioning, vitality, energy or fatigue and general health perceptions. No~~  
26 ~~significant differences were found from baseline to follow up in perceived control in the~~  
27 ~~nutrition group. Once again, all the MFI fatigue scales decreased over a 3 month period and~~  
28 ~~numerous symptom related indices also showed improvements; sore throat, swollen lymph~~  
29 ~~glands, fatigue after exertion, muscle aches or muscle pains, pain in joints, chills, headaches,~~  
30 ~~abdominal pain and sensitivity to light. The way in which the individuals in this group~~  
31 ~~responded to stress also decreased over the 3 month time period.~~

32  
33  
34  
35  
36  
37  
38  
39  
40  
41 ~~In terms of general health as evaluated by the SF-36 measure, the group who received both~~  
42 ~~psychological and nutritional intervention reported reductions in role limitations due to~~  
43 ~~physical difficulties, social functioning, role limitations due to emotional difficulties and~~  
44 ~~general health perceptions. No significant differences were found from baseline to follow up~~  
45 ~~in perceived control as measured by the MHLCS in the combined treatment group. Only one~~  
46 ~~measure of fatigue, that of physical fatigue, saw significant improvements over time.~~  
47  
48  
49 ~~Diarrhea, fatigue after exertion, chills, headaches and sinus and nasal symptoms all illustrated~~  
50  
51  
52  
53  
54  
55  
56  
57  
58  
59  
60

1  
2  
3  
4  
5  
6  
7  
8  
9  
10  
11  
12  
13  
14  
15  
16  
17  
18  
19  
20  
21  
22  
23  
24  
25  
26  
27  
28  
29  
30  
31  
32  
33  
34  
35  
36  
37  
38  
39  
40  
41  
42  
43  
44  
45  
46  
47  
48  
49  
50  
51  
52  
53  
54  
55  
56  
57  
58  
59  
60

significant reductions over the 3 month interval, as did the Maladaptive Stress Response. (See Table 2 for descriptive and inferential statistics associated with these findings and Table 3 for percentage of change over time.)

### Comparisons across groups

Once correction for baseline variation was achieved, there were no significant differences between the three groups in terms of change scores.

As shown in Table 3, three of the outcome measures differed significantly in terms of change from baseline to follow up, namely the MHLCs 'chance' sub scale ( $H(2) = 7.674, p < .05$ ), the MFI 'general fatigue' sub scale ( $H(2) = 6.790, p < .05$ ) and the CDC-CFS symptom 'headaches' ( $H(2) = 6.625, p < .05$ ). In terms of perceived control and general fatigue, the psychology group differed significantly as compared to the combined group ( $U = 110.500, p < .05$ ) and ( $U = 118.000, p < .05$ ), respectively, with the psychology group seeing a greater change over time as compared to the combined group on both measures. Regarding headaches, the combined group ( $U = 118.000, p < .05$ ) improved significantly more than the psychology group. No other comparisons reached statistical significance with a Bonferroni correction for multiple comparisons.

## Discussion

### Key results

There was statistically significant (rather than known clinically significant) change over time of numerous measures in all groups investigated. However, this is not to say that these changes were due to the interventions as the design of this study was exploratory, rather than experimental (please see below for a further critique of the design). The psychology group contained the most significant findings, including those concerned with daily functioning,

1  
2  
3  
4  
5  
6  
7 fatigue, locus of control, the cognitive CDC CFS specific symptoms and the Maladaptive  
8 Stress Response. As expected, changes in perceived control were not observed in the  
9 nutrition group as this is not an area that is targeted in this program. However, the more  
10 immune-type symptoms such as sore throat, swollen lymph nodes or glands and pain in joints  
11 did see significant reductions over time as would be envisaged in treatment protocols based  
12 upon nutritional expertise. The group that exhibited the least significant findings was the  
13 combined group and, as noted below, this may be due to the greater general severity of  
14 symptoms in this group and the need for a more lengthy intervention. Nevertheless,  
15 considering the small sample sizes in the groups at follow-up, these results are very  
16 promising and warrant further attention. ~~In terms of these preliminary findings, the~~  
17 ~~psychology group performed better with regard to lowering the belief that chance influences~~  
18 ~~the course of the condition. This is an important observation as the unpredictable nature of~~  
19 ~~ME/CFS can be one of the most difficult components for individuals to cope with<sup>45</sup> and~~  
20 ~~helping patients gain an improved sense of control over the illness is of great potential~~  
21 ~~benefit. The psychology group also demonstrated a significantly greater change score in~~  
22 ~~general fatigue as compared with the combined group which may infer that in the short term,~~  
23 ~~guiding individuals through the complex nature of the disorder, helping them to understand it~~  
24 ~~and accept that the condition itself gives rise to stresses and psychological distress may be a~~  
25 ~~good starting point for intervention (i.e. a stepped program could be developed).~~

### 45 Interpretation

46  
47 As noted previously <sup>3130</sup> patient-centered, individualized treatment protocols which include a  
48 range of tailored strategies is a favorable direction for dealing with a complex and multi-  
49 system disorder such as ME/CFS. The present study has demonstrated that such interventions  
50 may be ~~are~~ useful in lowering symptomatology, improving functioning and helping  
51  
52  
53  
54  
55  
56  
57  
58  
59  
60

1  
2  
3  
4  
5  
6  
7 individuals gain a greater sense of control over their health status. ~~Considering that the~~  
8 ~~options available on the National Health Service, mainly CBT and GET, are often perceived~~  
9 ~~as coping strategies at best, and physically damaging at worst~~<sup>46</sup>, ~~tailored treatments such as~~  
10 ~~described here may be more palatable, and hence effective.~~

### 16 **Limitations and Generalisability**

17  
18 This study ~~was a preliminary study in a naturalistic setting and as such did not have a robust~~  
19 ~~design. There was not a~~ ~~did not have a~~ control group ~~and the participants were not randomly~~  
20 ~~assigned to groups, therefore so~~ the results should be treated with caution. ~~In order to~~  
21 ~~ascertain whether the changes in symptom and functional reports were due to the~~  
22 ~~interventions, a randomized control trial should be conducted (RCT). Also, the participants~~  
23 ~~were not randomly assigned to groups as this was a naturalistic, observational study. Also,~~  
24 ~~there was a high drop-out rate from time-one to time-two and this rate differed across groups.~~  
25 ~~The highest drop-out rate was in the psychology group; whilst we cannot be sure why this~~  
26 ~~occurred, it is postulated that the retention was poor in the group as the individuals in the~~  
27 ~~psychology program had more activities to engage in and may have felt overburdened with~~  
28 ~~the research questionnaires in addition to their session and homework (this would not be the~~  
29 ~~case in the combined group as the therapeutic activities are phased-in as mentioned above).~~

30  
31  
32  
33  
34  
35  
36  
37  
38  
39  
40  
41  
42  
43 In this study, ~~e~~Each individual was guided to appropriate treatment within an initial screening  
44 with clinic staff; therefore the group was dependent on the nature of the individual's  
45 symptoms and their personal choice as the programs on offer were privately funded.

46  
47  
48  
49 ~~However, as can be seen in the baseline comparisons, the groups did not differ in terms of~~  
50 ~~gender, age, illness duration or the majority of outcome measures.~~ Notably, the groups did  
51 differ in general and physical fatigue with participants in the combined groups reporting  
52  
53  
54  
55  
56  
57  
58  
59  
60

1  
2  
3  
4  
5  
6  
7 greater fatigue than those in the psychology group which suggests that this group's general  
8  
9 symptomatology was more severe. The combined group illustrated less ~~change~~improvement  
10 over time compared to the psychology and nutrition groups and it is feasible to infer that  
11 individuals with a greater number and degree of complaints are referred to the combined  
12 group within the clinic. ~~Also, it should be noted that the interventions in the combined~~  
13 ~~program are phased in as it was found that asking individuals to engage in numerous~~  
14 ~~therapeutic activities resulted in high drop-out rates. Also, those in the combined group will~~  
15 ~~not experience the intensity of each intervention as this has been demonstrated to result in~~  
16 ~~non-compliance;~~ therefore, changes in outcome measures in this group may not be noted at  
17 an interval of three months ~~for that group~~. Further studies underway presently will investigate  
18 follow-ups at 6- and 12-months to identify whether the findings here are maintained over  
19 time and also whether those with greater symptom severity benefit with a longer intervention.  
20  
21 As the participants were self-selected onto these programs, the findings lack generalizability;  
22 future work should sample from the overall ME/CFS population and be randomly-assigned to  
23 groups in order to make valid assumptions regarding the illness-group as a whole.  
24  
25  
26  
27  
28  
29  
30  
31  
32  
33  
34  
35  
36

### 37 Funding

38 No external funding was obtained for this research; the work was accomplished in-house at  
39 the clinic in question.  
40  
41  
42  
43  
44  
45  
46

### 47 Data Sharing

48 Dataset available from the corresponding author at [m.a.arroll@sa.uel.ac.uk](mailto:m.a.arroll@sa.uel.ac.uk). Consent was not  
49 obtained for data sharing but the presented data are anonymised and risk of identification is  
50 low.  
51  
52  
53  
54  
55  
56  
57  
58  
59  
60

### Contributorship

Alex Howard made substantial contributions to the conception and design and acquisition of data, whilst Megan Arroll made a substantial contribution to the analysis and interpretation of data. Both authors made a substantial contribution to the drafting of the article and revisions for the critical review of important intellectual content. Final approval of the version to be published was also granted by both authors.

### Acknowledgements

We would like to thank Tomas Ros for preparing the questionnaire spreadsheet, Niki Gratrix for helping in setting-up the study and Andy McLellan and Val Duschinsky for proof-reading and editing.

Formatted: Font: Not Bold

### Competing Interests

Alex Howard is the founder and CEO of The Optimum Health Clinic and Megan Arroll is the Director of Research at the Optimum Health Clinic, where this study was conducted.



## List of abbreviations

ME: myalgic encephalomyelitis

CFS: Chronic Fatigue Syndrome

NICE: National Institute for Health and Clinical Excellence

CBT: Cognitive Behavioral Therapy

GET: Graded Exercise Therapy

[APT: Adaptive Pacing Therapy](#)

[SMC: specialist medical care](#)

CAM: Complementary and Alternative Medicine

NLP: Neuro-linguistic Programming

EFT: Emotional Freedom Technique

SF-36: Medical Outcomes Survey Short-Form 36

MHLCS: Multidimensional Health Locus of Control Scale

MFI: Multidimensional Fatigue Inventory

[RCT: randomized controlled trial](#)

## Reference List

- (1) Fukuda K, Straus SE, Hickie I, Sharpe MC, Dobbins JG, Komaroff A. The chronic fatigue syndrome: A comprehensive approach to its definition and study. *Annals of Internal Medicine* 1994; 121:953-959.
- (2) Jason LAE, Fennell PAE, Taylor RRE. Handbook of chronic fatigue syndrome. 2003.
- (3) Price JR, Couper J. Cognitive behaviour therapy for chronic fatigue syndrome in adults. *The Cochrane Database of Systematic Reviews* 1998; 4:1-38.
- (4) Price JR, Mitchell E, Tidy E, Hunot V. Cognitive behaviour therapy for chronic fatigue syndrome in adults. *Cochrane Database of Systematic Reviews* 2008;(Issue 3).
- (5) Edmonds M, McGuire H, Price J. Exercise therapy for chronic fatigue syndrome. *The Cochrane Database of Systematic Reviews* 2004; 3:1-25.

1  
2  
3  
4  
5  
6  
7 [\(6\) White PD, Goldsmith AL, Johnson AL, Potts L, Walwyn R, DeCesare JC et al. Comparison of adaptive pacing therapy, cognitive behaviour therapy, graded exercises therapy, and specialist medical care for chronic fatigue syndrome \(PACE\): a randomised trial. \*Lancet\* 2011; 377\(9768\):823-836.](#)

Formatted: Font: Italic

11 (76) National Institute for Health and Clinical Excellence. Chronic fatigue syndrome/myalgic encephalomyelitis (or encephalopathy): Diagnosis and management of CFS/ME in adults and children. London: NICE; 2007.

15 (87) Wearden AJ, Morriss RK, Mullis R, Strickland PL, Pearson DJ, Appleby L et al. Randomised, double-blind, placebo-controlled treatment trial of fluoxetine and graded exercise for chronic fatigue syndrome. *British Journal of Psychiatry* 1998; 172(6):485-490.

19 (98) Vercoulen JH, Swanink CM, Zitman FG, Vreden SG, Hoofs MP, Fennis JF et al. Randomised, double-blind, placebo-controlled study of fluoxetine in chronic fatigue syndrome. *Lancet* 1996; 347(9005):858-861.

23 (109) Goodnick PJ, Jorge CM. Treatment of chronic fatigue syndrome with nefazodone. *American Journal of Psychiatry* 1999; 156(5):797-798.

25 (110) Goodnick PJ. Treatment of chronic fatigue syndrome with venlafaxine. *American Journal of Psychiatry* 1996; 153(2):294.

29 (124) Goodnick PJ, Sandoval R. Psychotropic treatment of chronic fatigue syndrome and related disorders. *Journal of Clinical Psychiatry* 1993; 54(1):13-20.

31 (132) Goodnick PJ, Sandoval R, Brickman A, Klimas NG. Bupropion treatment of fluoxetine-resistant chronic fatigue syndrome. *Biological Psychiatry* 1992; 32(9):834-838.

33 (143) Hickie I. Nefazodone for patients with chronic fatigue syndrome. *Australian and New Zealand Journal of Psychiatry* 1999; 33(2):278-280.

35 (154) Levine P, Schwartz S, Furst G. Medical intervention and management. 2003.

37 (165) Afari N, Buchwald D. Chronic fatigue syndrome: A review. *American Journal of Psychiatry* 2003; 160(2):221-236.

39 (176) Reid S, Chalder T, Cleare A, Hotopf M, Wessely S. Extracts from "Clinical Evidence": Chronic fatigue syndrome. *British Medical Journal* 2000; 320:292-296.

41 (187) Lange G, Cook DB, Natelson BH. Rehabilitation and Treatment of Fatigue. 2005.

43 (198) Jones J, Boorman J, Cann P, Forbes S, Gomborne J, Heaton K et al. British Society of Gastroenterology guidelines for the management of the irritable bowel syndrome. *Gut* 2000; 47((Suppl II)):ii1-ii19.

45 (2049) Warren G, McKendrick M, Peet M. The role of essential fatty acids in chronic fatigue syndrome: A case-controlled study of red-cell membrane essential fatty acids (EFA) and a placebo-controlled treatment study with high dose of EFA. *Acta Neurologica Scandinavica* 1999; 99(2):112-116.

1  
2  
3  
4  
5  
6  
7  
8  
9  
10  
11  
12  
13  
14  
15  
16  
17  
18  
19  
20  
21  
22  
23  
24  
25  
26  
27  
28  
29  
30  
31  
32  
33  
34  
35  
36  
37  
38  
39  
40  
41  
42  
43  
44  
45  
46  
47  
48  
49  
50  
51  
52  
53  
54  
55  
56  
57  
58  
59  
60

- (219) Kaslow JE, Rucker L, Onishi R. Liver extract-folic acid-cyanocobalamin vs placebo for chronic fatigue syndrome. *Archives of Internal Medicine* 1989; 149(11):2501-2503.
- (224) Kodama M, Kodama T, Murakami M. The value of the dehydroepiandrosterone-annexed vitamin C infusion treatment in the clinical control of chronic fatigue syndrome (CFS). II. Characterization of CFS patients with special reference to their response to a new vitamin C infusion treatment. *In Vivo* 1996; 10:585-596.
- (232) Langsjoen PH, Folkers K. Isolated diastolic dysfunction of the myocardium and its response to CoQ10 treatment. *The Clinical Investigator* 1993; 71:S140-144.
- (243) Cox IM, Campbell MJ, Dowson D. Red blood cell magnesium and chronic fatigue syndrome. *Lancet* 1991; 337:757-760.
- (254) Bentler SE, Hartz AJ, Kuhn EM. Prospective Observational Study of Treatments for Unexplained Chronic Fatigue. *Journal of Clinical Psychiatry* 2005; 66(5):May-632.
- (265) Martin RWY, Ogston SA, Evans JR. Effects of Vitamin and Mineral Supplementation on Symptoms Associated with Chronic Fatigue Syndrome with Coxsackie B Antibodies. *Journal of Nutritional & Environmental Medicine* 2008; 4:11-23.
- (276) Wiebe E. N of 1 trials. Managing patients with chronic fatigue syndrome: two case reports. *Canadian Family Physician* 1996; 42:2214-2217.
- (287) Brouwers FM, Van Der Werf S, Bleijenberg G, Van Der Zee L, Van Der Meer J-WM. The effect of a polynutrient supplement on fatigue and physical activity of patients with chronic fatigue syndrome: A double-blind randomized controlled trial. *QJM: Monthly Journal of the Association of Physicians* 2002; 95(10):677-683.
- (298) Afari N, Eisenberg DM, Herrell R, Goldberg J, Kleyman E, Ashton S et al. Use of alternative treatments by chronic fatigue syndrome discordant twins. *Integrative Medicine* 2000; 2:97-103.
- (3029) Buchwald D, Garrity D. Comparison of patients with chronic fatigue syndrome, fibromyalgia, and multiple chemical sensitivities. *Archives of Internal Medicine* 1994; 154(18):2049-2053.
- (319) Porter NA, Jason LA, Boulton A, Bothne N, Coleman B. Alternative medical interventions used in the treatment and management of myalgic encephalomyelitis/chronic fatigue syndrome and fibromyalgia. *Journal of Alternative and Complementary Medicine* 2010; 16(3):235-249.
- (324) Alraek T, Lee MS, Choi TY, Cao H, Liu J. Complementary and alternative medicine for patients with chronic fatigue syndrome: A systematic review. *BMC Complementary and Alternative Medicine* 2010; 11(87):<http://www.biomedcentral.com/1472-6882/11/87>.
- (33) Howard A, Arroll M. The application of integral medicine in the treatment of myalgic encephalomyelitis/ Chronic Fatigue Syndrome. *Journal of Integral Theory and Practice* 2011; 6(4):25-40.

- 1  
2  
3  
4  
5  
6  
7 | (342) Ware JE, Sherbourne CD. The MOS 36-Item Short-Form Health Survey (SF-36).  
8 *Medical Care* 1992; 30:473-481.
- 9  
10 | (353) Tsai C, Bayliss MS, Ware JE. Health Survey Annotated Bibliography: Second Edition  
11 (1988-1996). Boston, MA: Health Assessment Lab, New England Medical Center; 1997.
- 12  
13 | (364) Ware JE, Kosinski M, Keller SK. SF-36® Physical and Mental Health Summary  
14 Scales: A User's Manual. Boston, MA: New England Medical Center, The Health Institute;  
15 1994.
- 16  
17 | (375) Ware JE, Snow KK, Kosinski M, Gandek B. SF-36® Health Survey Manual and  
18 Interpretation Guide. Boston, MA: New England Medical Center, The Health Institute; 1993.
- 19  
20 | [\(38\) Smets E-MA, Garssen B, Bonke B, de Haes J-CJM. The Multidimensional Fatigue  
21 Inventory \(MFI\) psychometric qualities of an instrument to assess fatigue. \*Journal of  
22 Psychosomatic Research\* 1995; 39\(3\):315-325.](#)
- 23  
24 | [\(39\) Wagner D, Nisenbaum R, Heim C, Jones JF, Unger ER, Reeves WC. Psychometric  
25 properties of the CDC Symptom Inventory for assessment of Chronic Fatigue  
26 Syndrome. \*Population Health Metrics\* 2005; 3\(8\).](#)
- 27  
28 | [\(40\) Chalder T, Berelozit G, Pawlikowska T, Watts L, Wessely S, Wright D et al.  
29 Development of a fatigue scale. \*Journal of Psychosomatic Research\* 1993; 37:147-153.](#)
- 30  
31 | (4136) Wallston KA, Wallston BS, DeVellis R. Development of the  
32 Multidimensional Health Locus of Control (MHLC) Scales. *Health Education Monograph*  
33 1978; 6(2):160-170.
- 34  
35 | (4237) Wallston KA, Stein MJ, Smith CA. Form C of the MHLC Scales: A condition-  
36 specific measure of locus of control. *Journal of Personality Assessment* 1994; 63:534-553.
- 37  
38 | (4338) Wallston KA, Wallston BS. Health locus of control scales. In: Lefcourt H, editor.  
39 Advances and innovations in locus of control research. New York: Academic Press; 1980.
- 40  
41 | (4439) Levenson H. Multidimensional locus of control in psychiatric patients. *Journal of  
42 Consulting and Clinical Psychology* 1973; 41(3):397-404.
- 43  
44 | ~~(40) Smets E-MA, Garssen B, Bonke B, de Haes J-CJM. The Multidimensional Fatigue  
45 Inventory (MFI) psychometric qualities of an instrument to assess fatigue. *Journal of  
46 Psychosomatic Research* 1995; 39(3):315-325.~~
- 47  
48 | ~~(41) Wagner D, Nisenbaum R, Heim C, Jones JF, Unger ER, Reeves WC. Psychometric  
49 properties of the CDC Symptom Inventory for assessment of Chronic Fatigue  
50 Syndrome. *Population Health Metrics* 2005; 3(8).~~
- 51  
52 | ~~(42) Chalder T, Berelozit G, Pawlikowska T, Watts L, Wessely S, Wright D et al.  
53 Development of a fatigue scale. *Journal of Psychosomatic Research* 1993; 37:147-153.~~
- 54  
55 | (453) Arroll MA, Howard A. The development of the Maladaptive Stress Index. 2012; in  
56 prep.
- 57  
58  
59  
60

1  
2  
3  
4  
5  
6  
7 | (464) Tabachnick BG, Fidell LS. Using multivariate statistics. 4th ed. Needham Heights,  
8 MA: Allyn & Bacon; 2001.

9  
10 | ~~(45) Arroll MA, Senior V. Individuals' Experience of Chronic Fatigue Syndrome/ Myalgic~~  
11 ~~Encephalomyelitis: An Interpretative Phenomenological Analysis. *Psychology and Health*~~  
12 ~~2008; 23:443-458.~~

13 | ~~(46) Kindon T. Reporting of Harms Associated with Graded Exercise Therapy and~~  
14 ~~Cognitive Behavioural Therapy in Myalgic Encephalomyelitis/Chronic Fatigue~~  
15 ~~Syndrome. *Bulletin of the International Association of CFS/ME* 2011; 19(2):59-111.~~

Table 1. Baseline comparisons of sample demographics and outcome variables

|                                    |            | Mean                    | SD     | 95% CI for Mean |        | Test statistic     | p-value |
|------------------------------------|------------|-------------------------|--------|-----------------|--------|--------------------|---------|
|                                    |            |                         |        | Lower           | Upper  |                    |         |
| Gender                             | Psychology | 9 (21.4%) <sup>d</sup>  |        |                 |        | .179 <sup>e</sup>  | .915    |
|                                    | Nutrition  | 8 (18.2%) <sup>d</sup>  |        |                 |        |                    |         |
|                                    | Combined   | 11 (21.2%) <sup>d</sup> |        |                 |        |                    |         |
|                                    | Total      | 28 (20.3%) <sup>d</sup> |        |                 |        |                    |         |
| Age                                | Psychology | 42.881                  | 13.986 | 38.523          | 47.239 | .000 <sup>a</sup>  | 1.000   |
|                                    | Nutrition  | 42.864                  | 12.504 | 39.062          | 46.665 |                    |         |
|                                    | Combined   | 42.843                  | 11.125 | 39.714          | 45.972 |                    |         |
|                                    | Total      | 42.861                  | 12.406 | 40.765          | 44.957 |                    |         |
| Illness duration                   | Psychology | 8.874                   | 8.252  | 6.302           | 11.445 | .252 <sup>a</sup>  | .778    |
|                                    | Nutrition  | 10.023                  | 7.375  | 7.781           | 12.265 |                    |         |
|                                    | Combined   | 9.625                   | 7.291  | 7.595           | 11.655 |                    |         |
|                                    | Total      | 9.523                   | 7.580  | 8.247           | 10.800 |                    |         |
| SF-36<br>Physical Functioning      | Psychology | 49.339                  | 22.698 | 42.266          | 56.413 | .319 <sup>a</sup>  | .727    |
|                                    | Nutrition  | 47.855                  | 26.226 | 39.882          | 55.829 |                    |         |
|                                    | Combined   | 45.299                  | 25.479 | 38.206          | 52.393 |                    |         |
|                                    | Total      | 47.344                  | 24.792 | 43.171          | 51.517 |                    |         |
| SF-36<br>Role limitations physical | Psychology | 7.143                   | 15.894 | 2.190           | 12.096 | .281 <sup>a</sup>  | .755    |
|                                    | Nutrition  | 7.574                   | 17.500 | 2.254           | 12.895 |                    |         |
|                                    | Combined   | 9.774                   | 21.051 | 3.914           | 15.635 |                    |         |
|                                    | Total      | 8.272                   | 18.387 | 5.177           | 11.367 |                    |         |
| SF-36                              | Psychology | 61.548                  | 25.614 | 53.566          | 69.530 | 1.002 <sup>a</sup> | .370    |

1  
2  
3  
4  
5  
6  
7  
8  
9  
10  
11  
12  
13  
14  
15  
16  
17  
18  
19  
20  
21  
22  
23  
24  
25  
26  
27  
28  
29  
30  
31  
32  
33  
34  
35  
36  
37  
38  
39  
40  
41  
42  
43  
44  
45  
46  
47  
48  
49

|                                     |            |        |         |        |        |                    |       |
|-------------------------------------|------------|--------|---------|--------|--------|--------------------|-------|
| Bodily pain                         | Nutrition  | 55.625 | 30.242  | 46.431 | 64.819 |                    |       |
|                                     | Combined   | 53.606 | 27.019  | 46.084 | 61.128 |                    |       |
|                                     | Total      | 56.667 | 27.683  | 52.007 | 61.327 |                    |       |
| SF-36                               | Psychology | 37.202 | 21.824  | 30.402 | 44.003 | -.536 <sup>a</sup> | -.586 |
| Social functioning                  | Nutrition  | 32.671 | 25.888  | 24.800 | 40.541 |                    |       |
|                                     | Combined   | 32.452 | 24.786  | 25.552 | 39.352 |                    |       |
|                                     | Total      | 33.967 | 24.212  | 29.892 | 38.043 |                    |       |
| SF-36<br>General mental health      | Psychology | 60.286 | 19.584  | 54.183 | 66.389 | -.124 <sup>a</sup> | -.884 |
|                                     | Nutrition  | 59.727 | 19.355  | 53.843 | 65.612 |                    |       |
|                                     | Combined   | 58.308 | 20.948  | 52.476 | 64.140 |                    |       |
|                                     | Total      | 59.362 | 19.911  | 56.011 | 62.714 |                    |       |
| SF-36<br>Role limitations emotional | Psychology | 55.554 | 46.368  | 41.104 | 70.004 | -.390 <sup>a</sup> | -.678 |
|                                     | Nutrition  | 48.482 | 47.390  | 34.074 | 62.890 |                    |       |
|                                     | Combined   | 47.780 | 43.924  | 35.551 | 60.008 |                    |       |
|                                     | Total      | 50.370 | 45.590  | 42.695 | 58.044 |                    |       |
| SF-36<br>Vitality Energy or Fatigue | Psychology | 20.714 | 16.1386 | 15.685 | 25.743 | -.129 <sup>a</sup> | -.879 |
|                                     | Nutrition  | 20.114 | 14.570  | 15.685 | 24.542 |                    |       |
|                                     | Combined   | 19.039 | 17.658  | 14.123 | 23.955 |                    |       |
|                                     | Total      | 19.891 | 16.159  | 17.171 | 22.611 |                    |       |
| SF-36<br>General health perceptions | Psychology | 37.024 | 17.945  | 31.432 | 42.616 | 2.769 <sup>a</sup> | -.066 |
|                                     | Nutrition  | 28.636 | 15.528  | 23.915 | 33.357 |                    |       |
|                                     | Combined   | 30.962 | 17.575  | 26.069 | 35.854 |                    |       |
|                                     | Total      | 32.065 | 17.286  | 29.156 | 34.975 |                    |       |
| MHLCs Internal                      | Psychology | -.677  | -.159   | -.627  | -.726  | 1.216 <sup>a</sup> | -.300 |
|                                     | Nutrition  | -.622  | -.177   | -.568  | -.675  |                    |       |

only

1  
2  
3  
4  
5  
6  
7  
8  
9  
10  
11  
12  
13  
14  
15  
16  
17  
18  
19  
20  
21  
22  
23  
24  
25  
26  
27  
28  
29  
30  
31  
32  
33  
34  
35  
36  
37  
38  
39  
40  
41  
42  
43  
44  
45  
46  
47  
48  
49

|                       |            |        |       |        |        |                    |                    |
|-----------------------|------------|--------|-------|--------|--------|--------------------|--------------------|
|                       | Combined   | -.662  | -.174 | -.613  | -.710  |                    |                    |
|                       | Total      | -.653  | -.171 | -.625  | -.682  |                    |                    |
| MHLCS-Chance          | Psychology | -.368  | -.156 | -.320  | -.417  | .395 <sup>a</sup>  | -.674              |
|                       | Nutrition  | -.340  | -.133 | -.299  | -.380  |                    |                    |
|                       | Combined   | -.354  | -.155 | -.311  | -.397  |                    |                    |
|                       | Total      | -.354  | -.148 | -.329  | -.379  |                    |                    |
| MHLCS-Powerful Others | Psychology | -.404  | -.134 | -.362  | -.446  | .119 <sup>a</sup>  | -.888              |
|                       | Nutrition  | -.417  | -.141 | -.374  | -.460  |                    |                    |
|                       | Combined   | -.407  | -.101 | -.379  | -.436  |                    |                    |
|                       | Total      | -.409  | -.124 | -.388  | -.430  |                    |                    |
| MHLCS-Doctors         | Psychology | -.169  | -.082 | -.143  | -.194  | .575 <sup>a</sup>  | -.564              |
|                       | Nutrition  | -.171  | -.089 | -.144  | -.197  |                    |                    |
|                       | Combined   | -.191  | -.147 | -.150  | -.232  |                    |                    |
|                       | Total      | -.178  | -.112 | -.159  | -.196  |                    |                    |
| MHLCS-Other People    | Psychology | -.235  | -.075 | -.212  | -.259  | 1.051 <sup>a</sup> | -.352              |
|                       | Nutrition  | -.264  | -.129 | -.225  | -.304  |                    |                    |
|                       | Combined   | -.245  | -.074 | -.224  | -.265  |                    |                    |
|                       | Total      | -.248  | -.095 | -.232  | -.264  |                    |                    |
| MFI-General Fatigue   | Psychology | 15.952 | 2.845 | 15.066 | 16.839 | 3.219 <sup>a</sup> | -.043 <sup>*</sup> |
|                       | Nutrition  | 16.977 | 2.601 | 16.186 | 17.768 |                    |                    |
|                       | Combined   | 17.327 | 2.587 | 16.607 | 18.047 |                    |                    |
|                       | Total      | 16.797 | 2.716 | 16.340 | 17.254 |                    |                    |
| MFI-Physical Fatigue  | Psychology | 15.929 | 3.331 | 14.891 | 16.966 | 3.343 <sup>a</sup> | -.038 <sup>*</sup> |
|                       | Nutrition  | 16.727 | 3.358 | 15.707 | 17.748 |                    |                    |
|                       | Combined   | 17.615 | 2.823 | 16.830 | 18.401 |                    |                    |

only



1  
2  
3  
4  
5  
6  
7  
8  
9  
10  
11  
12  
13  
14  
15  
16  
17  
18  
19  
20  
21  
22  
23  
24  
25  
26  
27  
28  
29  
30  
31  
32  
33  
34  
35  
36  
37  
38  
39  
40  
41  
42  
43  
44  
45  
46  
47  
48  
49

|                                       |            |        |       |        |        |                    |        |
|---------------------------------------|------------|--------|-------|--------|--------|--------------------|--------|
|                                       | Total      | 16.819 | 3.211 | 16.278 | 17.359 |                    |        |
| MFI                                   | Psychology | 13.857 | 4.112 | 12.576 | 15.138 | 1.030 <sup>a</sup> | -.360  |
| Reduced Activity                      | Nutrition  | 14.136 | 4.027 | 12.912 | 15.361 |                    |        |
|                                       | Combined   | 14.962 | 3.662 | 13.942 | 15.981 |                    |        |
|                                       | Total      | 14.362 | 3.921 | 13.702 | 15.022 |                    |        |
| MFI                                   | Psychology | 10.357 | 4.287 | 9.021  | 11.693 | 1.324 <sup>a</sup> | -.270  |
| Reduced Motivation                    | Nutrition  | 10.500 | 3.474 | 9.444  | 11.556 |                    |        |
|                                       | Combined   | 11.462 | 3.153 | 10.584 | 12.339 |                    |        |
|                                       | Total      | 10.819 | 3.639 | 10.206 | 11.431 |                    |        |
| MFI                                   | Psychology | 13.524 | 4.363 | 12.164 | 14.883 | .064 <sup>a</sup>  | -.938  |
| Mental Fatigue                        | Nutrition  | 13.682 | 4.328 | 12.366 | 14.998 |                    |        |
|                                       | Combined   | 13.846 | 4.345 | 12.637 | 15.056 |                    |        |
|                                       | Total      | 13.696 | 4.315 | 12.969 | 14.422 |                    |        |
| CDC-CFS                               | Psychology | 2.571  | 3.109 | 1.603  | 3.540  | 1.414 <sup>a</sup> | -.247  |
| Sore Throat                           | Nutrition  | 3.977  | 3.776 | 2.829  | 5.125  |                    |        |
|                                       | Combined   | 3.202  | 4.494 | 1.951  | 4.454  |                    |        |
|                                       | Total      | 3.257  | 3.898 | 2.601  | 3.914  |                    |        |
| CDC-CFS Swollen Lymph<br>nodes Glands | Psychology | 1.976  | 3.382 | .922   | 3.030  | 7.161 <sup>b</sup> | -.028* |
|                                       | Nutrition  | 5.561  | 6.491 | 3.587  | 7.534  |                    |        |
|                                       | Combined   | 3.462  | 4.881 | 2.103  | 4.820  |                    |        |
|                                       | Total      | 3.679  | 5.250 | 2.795  | 4.563  |                    |        |
| CDC-CFS                               | Psychology | 2.071  | 3.249 | 1.059  | 3.084  | .850 <sup>a</sup>  | -.430  |
| Diarrhoea/Diarrhea                    | Nutrition  | 2.841  | 4.832 | 1.372  | 4.310  |                    |        |
|                                       | Combined   | 3.135  | 3.773 | 2.084  | 4.185  |                    |        |
|                                       | Total      | 2.717  | 3.998 | 2.044  | 3.390  |                    |        |

only

|                                      |            |        |       |        |        |                    |       |
|--------------------------------------|------------|--------|-------|--------|--------|--------------------|-------|
| CDC-CFS Fatigue after exertion       | Psychology | 13.286 | 6.271 | 11.331 | 15.240 | .219 <sup>a</sup>  | -.803 |
|                                      | Nutrition  | 13.722 | 6.450 | 11.761 | 15.682 |                    |       |
|                                      | Combined   | 14.154 | 6.270 | 12.408 | 15.899 |                    |       |
|                                      | Total      | 13.752 | 6.292 | 12.693 | 14.811 |                    |       |
| CDC-CFS Muscle Aches or Muscle Pains | Psychology | 8.286  | 6.747 | 6.183  | 10.388 | -.166 <sup>a</sup> | -.847 |
|                                      | Nutrition  | 9.091  | 6.383 | 7.151  | 11.031 |                    |       |
|                                      | Combined   | 8.519  | 6.932 | 6.589  | 10.449 |                    |       |
|                                      | Total      | 8.630  | 6.664 | 7.509  | 9.752  |                    |       |
| CDC-CFS Pain In Joints               | Psychology | 3.476  | 5.334 | 1.814  | 5.138  | 1.373 <sup>a</sup> | -.257 |
|                                      | Nutrition  | 4.696  | 5.560 | 3.006  | 6.386  |                    |       |
|                                      | Combined   | 5.474  | 6.386 | 3.696  | 7.251  |                    |       |
|                                      | Total      | 4.618  | 5.837 | 3.635  | 5.600  |                    |       |
| CDC-CFS Fever                        | Psychology | 1.238  | 2.516 | -.454  | 2.022  | .027 <sup>a</sup>  | -.973 |
|                                      | Nutrition  | 1.394  | 2.562 | -.615  | 2.173  |                    |       |
|                                      | Combined   | 1.333  | 3.909 | -.245  | 2.421  |                    |       |
|                                      | Total      | 1.324  | 3.106 | -.801  | 1.846  |                    |       |
| CDC-CFS Chills                       | Psychology | 3.357  | 4.637 | 1.912  | 4.802  | -.206 <sup>a</sup> | -.814 |
|                                      | Nutrition  | 3.750  | 3.924 | 2.557  | 4.943  |                    |       |
|                                      | Combined   | 3.192  | 4.343 | 1.983  | 4.402  |                    |       |
|                                      | Total      | 3.420  | 4.283 | 2.699  | 4.141  |                    |       |
| CDC-CFS Unrefreshing Sleep           | Psychology | 12.905 | 6.792 | 10.788 | 15.021 | .150 <sup>a</sup>  | -.861 |
|                                      | Nutrition  | 12.250 | 7.088 | 10.095 | 14.405 |                    |       |
|                                      | Combined   | 12.154 | 7.147 | 10.164 | 14.144 |                    |       |
|                                      | Total      | 12.413 | 6.978 | 11.238 | 13.588 |                    |       |
| CDC-CFS Sleeping                     | Psychology | 9.286  | 7.658 | 6.899  | 11.672 | .085 <sup>a</sup>  | -.918 |

1  
2  
3  
4  
5  
6  
7  
8  
9  
10  
11  
12  
13  
14  
15  
16  
17  
18  
19  
20  
21  
22  
23  
24  
25  
26  
27  
28  
29  
30  
31  
32  
33  
34  
35  
36  
37  
38  
39  
40  
41  
42  
43  
44  
45  
46  
47  
48  
49

|                                  |            |       |       |        |        |                    |       |
|----------------------------------|------------|-------|-------|--------|--------|--------------------|-------|
| Problems                         | Nutrition  | 8.614 | 7.317 | 6.389  | 10.838 |                    |       |
|                                  | Combined   | 8.904 | 7.684 | 6.766  | 11.042 |                    |       |
|                                  | Total      | 8.928 | 7.509 | 7.664  | 10.192 |                    |       |
| CDC-CFS Headaches                | Psychology | 5.262 | 5.548 | 3.533  | 6.991  | 1.611 <sup>a</sup> | -.203 |
|                                  | Nutrition  | 7.646 | 7.040 | 5.506  | 9.786  |                    |       |
|                                  | Combined   | 6.346 | 5.857 | 4.715  | 7.977  |                    |       |
|                                  | Total      | 6.431 | 6.200 | 5.3871 | 7.474  |                    |       |
| CDC-CFS Memory Problems          | Psychology | 6.333 | 4.996 | 4.777  | 7.890  | 3.403 <sup>b</sup> | -.182 |
|                                  | Nutrition  | 9.409 | 7.183 | 7.225  | 11.593 |                    |       |
|                                  | Combined   | 8.173 | 7.610 | 6.055  | 10.292 |                    |       |
|                                  | Total      | 8.007 | 6.835 | 6.857  | 9.158  |                    |       |
| CDC-CFS Difficulty Concentrating | Psychology | 8.500 | 6.094 | 6.601  | 10.399 | .391 <sup>a</sup>  | -.677 |
|                                  | Nutrition  | 9.822 | 7.641 | 7.499  | 12.145 |                    |       |
|                                  | Combined   | 9.135 | 6.942 | 7.202  | 11.067 |                    |       |
|                                  | Total      | 9.161 | 6.903 | 7.999  | 10.323 |                    |       |
| CDC-CFS Nausea                   | Psychology | 3.476 | 4.845 | 1.966  | 4.986  | 1.162 <sup>a</sup> | -.316 |
|                                  | Nutrition  | 4.769 | 5.135 | 3.208  | 6.330  |                    |       |
|                                  | Combined   | 3.327 | 4.902 | 1.962  | 4.692  |                    |       |
|                                  | Total      | 3.832 | 4.966 | 2.996  | 4.668  |                    |       |
| CDC-CFS Abdominal Pain           | Psychology | 2.548 | 3.270 | 1.529  | 3.567  | 5.971 <sup>b</sup> | -.051 |
|                                  | Nutrition  | 5.064 | 5.165 | 3.493  | 6.634  |                    |       |
|                                  | Combined   | 3.750 | 4.635 | 2.460  | 5.041  |                    |       |
|                                  | Total      | 3.803 | 4.535 | 3.040  | 4.566  |                    |       |
| CDC-CFS Sinus Nasal Symptoms     | Psychology | 3.524 | 4.702 | 2.059  | 4.989  | 1.192 <sup>a</sup> | -.307 |
|                                  | Nutrition  | 5.469 | 6.476 | 3.500  | 7.438  |                    |       |

only

1  
2  
3  
4  
5  
6  
7  
8  
9  
10  
11  
12  
13  
14  
15  
16  
17  
18  
19  
20  
21  
22  
23  
24  
25  
26  
27  
28  
29  
30  
31  
32  
33  
34  
35  
36  
37  
38  
39  
40  
41  
42  
43  
44  
45  
46  
47  
48  
49

|                                              |            |        |        |        |         |                   |      |
|----------------------------------------------|------------|--------|--------|--------|---------|-------------------|------|
|                                              | Combined   | 4.789  | 6.304  | 3.034  | 6.544   |                   |      |
|                                              | Total      | 4.620  | 5.932  | 3.622  | 5.619   |                   |      |
| CDC-CFS Shortness Of Breath                  | Psychology | 3.000  | 4.191  | 1.694  | 4.306   | .095 <sup>a</sup> | .909 |
|                                              | Nutrition  | 3.285  | 4.090  | 2.026  | 4.543   |                   |      |
|                                              | Combined   | 3.392  | 4.788  | 2.046  | 4.739   |                   |      |
|                                              | Total      | 3.237  | 4.365  | 2.497  | 3.977   |                   |      |
| CDC-CFS Sensitivity To Light                 | Psychology | 3.429  | 5.347  | 1.762  | 5.095   | .794 <sup>a</sup> | .454 |
|                                              | Nutrition  | 5.031  | 6.097  | 3.177  | 6.884   |                   |      |
|                                              | Combined   | 4.481  | 6.360  | 2.710  | 6.251   |                   |      |
|                                              | Total      | 4.336  | 5.975  | 3.330  | 5.342   |                   |      |
| CDC-CFS Depression                           | Psychology | 3.952  | 3.938  | 2.725  | 5.180   | .160 <sup>b</sup> | .923 |
|                                              | Nutrition  | 4.477  | 5.450  | 2.821  | 6.134   |                   |      |
|                                              | Combined   | 5.077  | 5.950  | 3.420  | 6.734   |                   |      |
|                                              | Total      | 4.544  | 5.231  | 3.663  | 5.424   |                   |      |
| CDC-CFS Maladaptive Stress Index Scale Score | Psychology | 94.381 | 16.836 | 89.134 | 99.628  | .465 <sup>a</sup> | .629 |
|                                              | Nutrition  | 96.386 | 21.946 | 89.714 | 103.059 |                   |      |
|                                              | Combined   | 98.269 | 19.165 | 92.934 | 103.605 |                   |      |
|                                              | Total      | 96.486 | 19.373 | 93.225 | 99.747  |                   |      |

<sup>a</sup>F-statistic for one-way analysis of variance, d.f.=2,134

<sup>b</sup>H-statistic for Kruskal-Wallis test, d.f.=2

<sup>c</sup> $\chi^2$ -statistic for comparison of nominal level data, d.f.=2

<sup>d</sup>number of males

\* test is significant at the  $p < .05$  level

only

Table 2. Outcome variable comparisons across time

|                           |            | Baseline |        |                 |        | 3-month follow-up |        |                 |        | Comparisons |         |
|---------------------------|------------|----------|--------|-----------------|--------|-------------------|--------|-----------------|--------|-------------|---------|
|                           |            | Mean     | SD     | 95% CI for Mean |        | Mean              | SD     | 95% CI for Mean |        | z-statistic | p-value |
|                           |            |          |        | Lower           | Upper  |                   |        | Lower           | Upper  |             |         |
| SF-36                     | Psychology | 49.339   | 22.698 | 42.266          | 56.413 | 59.267            | 30.346 | 41.745          | 76.788 | -2.707      | .007**  |
| Physical Functioning      | Nutrition  | 47.855   | 26.226 | 39.882          | 55.829 | 46.706            | 30.744 | 34.544          | 58.868 | -1.136      | .256    |
|                           | Combined   | 45.299   | 25.479 | 38.206          | 52.393 | 49.288            | 26.403 | 39.604          | 58.973 | -1.850      | .064    |
|                           | Total      | 47.344   | 24.791 | 43.171          | 51.517 | 50.260            | 28.818 | 43.488          | 57.032 | -3.120      | .002**  |
| SF-36                     | Psychology | 7.143    | 15.894 | 2.190           | 12.096 | 46.429            | 39.048 | 23.883          | 68.974 | -2.379      | .017*   |
| Role limitations physical | Nutrition  | 7.574    | 17.500 | 2.254           | 12.895 | 19.444            | 20.016 | 11.526          | 27.363 | -2.907      | .004**  |
|                           | Combined   | 9.774    | 21.051 | 3.914           | 15.635 | 22.742            | 25.161 | 13.513          | 31.971 | -2.225      | .026*   |
|                           | Total      | 8.272    | 18.387 | 5.177           | 11.367 | 26.111            | 28.225 | 19.479          | 32.744 | -4.354      | .001*** |
| SF-36                     | Psychology | 61.548   | 25.614 | 53.566          | 69.530 | 63.929            | 29.786 | 46.731          | 81.127 | -1.196      | .232    |
| Bodily pain               | Nutrition  | 55.625   | 30.242 | 46.434          | 64.819 | 58.889            | 32.943 | 45.857          | 71.921 | -1.800      | .072    |
|                           | Combined   | 53.606   | 27.019 | 46.084          | 61.128 | 58.629            | 27.301 | 48.615          | 68.643 | -1.048      | .294    |
|                           | Total      | 56.667   | 27.683 | 52.007          | 61.327 | 59.757            | 29.649 | 52.790          | 66.724 | -2.240      | .025*   |
| SF-36                     | Psychology | 37.202   | 21.824 | 30.402          | 44.003 | 59.821            | 33.318 | 40.584          | 79.058 | -2.689      | .007**  |
| Social functioning        | Nutrition  | 32.671   | 25.888 | 24.800          | 40.541 | 43.519            | 33.679 | 30.196          | 56.841 | -2.476      | .013*   |
|                           | Combined   | 32.452   | 24.786 | 25.551          | 39.352 | 41.936            | 28.604 | 31.443          | 52.428 | -2.426      | .015*   |
|                           | Total      | 33.967   | 24.212 | 29.892          | 38.043 | 46.007            | 31.805 | 38.533          | 53.481 | -4.504      | .001*** |
| SF-36                     | Psychology | 60.286   | 19.584 | 54.183          | 66.389 | 74.571            | 13.276 | 66.906          | 82.237 | -2.497      | .013*   |
| General mental health     | Nutrition  | 59.727   | 19.355 | 53.843          | 65.612 | 64.741            | 20.548 | 56.612          | 72.869 | -1.696      | .090    |
|                           | Combined   | 58.308   | 20.948 | 52.476          | 64.140 | 64.129            | 16.637 | 58.027          | 70.232 | -.524       | .600    |

1  
2  
3  
4  
5  
6  
7  
8  
9  
10  
11  
12  
13  
14  
15  
16  
17  
18  
19  
20  
21  
22  
23  
24  
25  
26  
27  
28  
29  
30  
31  
32  
33  
34  
35  
36  
37  
38  
39  
40  
41  
42  
43  
44  
45  
46  
47  
48  
49

|                 |            |        |         |        |        |        |        |         |        |        |          |
|-----------------|------------|--------|---------|--------|--------|--------|--------|---------|--------|--------|----------|
|                 | Total      | 59.362 | 19.911  | 56.011 | 62.714 | 66.389 | 17.897 | 62.183  | 70.594 | -2.665 | -.008**  |
| SF-36           | Psychology | 55.554 | 46.368  | 41.105 | 70.004 | 76.191 | 33.150 | 57.051  | 95.331 | -.842  | -.400    |
| Role            | Nutrition  | 48.482 | 47.390  | 34.074 | 62.890 | 55.594 | 38.130 | 40.510  | 70.678 | -1.788 | -.074    |
| limitations     | Combined   | 47.780 | 43.924  | 35.551 | 60.008 | 67.742 | 32.756 | 55.727  | 79.757 | -2.313 | -.021*   |
| emotional       | Total      | 50.370 | 45.590  | 42.695 | 58.044 | 64.829 | 35.335 | 56.526  | 73.133 | -3.159 | -.002**  |
| SF-36           | Psychology | 20.714 | 16.139  | 15.685 | 25.743 | 41.071 | 20.586 | 29.186  | 52.957 | -3.066 | -.002**  |
| Vitality-Energy | Nutrition  | 20.114 | 14.5670 | 15.685 | 24.542 | 31.111 | 23.588 | 21.780  | 40.442 | -2.734 | -.006**  |
| or-Fatigue      | Combined   | 19.039 | 17.658  | 14.123 | 23.955 | 27.097 | 19.527 | 19.934  | 34.259 | -1.558 | -.119    |
|                 | Total      | 19.891 | 16.159  | 17.171 | 22.611 | 31.319 | 21.657 | 26.230  | 36.409 | -4.205 | -.001*** |
| SF-36           | Psychology | 37.024 | 17.945  | 31.432 | 42.616 | 45.714 | 21.109 | 33.526  | 57.903 | -2.561 | -.010*   |
| General health  | Nutrition  | 28.636 | 15.528  | 23.915 | 33.357 | 36.482 | 18.903 | 29.004  | 43.959 | -2.157 | -.031*   |
| perceptions     | Combined   | 30.962 | 17.575  | 26.069 | 35.854 | 42.097 | 21.632 | 34.162  | 50.032 | -2.423 | -.015*   |
|                 | Total      | 32.065 | 17.286  | 29.156 | 34.975 | 40.694 | 20.561 | -35.863 | 45.526 | -3.996 | -.001*** |
| MHLCS           | Psychology | -.677  | -.159   | -.627  | -.726  | -.821  | -.251  | -.676   | -.966  | -2.983 | -.003**  |
| Internal        | Nutrition  | -.622  | -.177   | -.568  | -.675  | 1.193  | 2.969  | -.019   | 2.368  | -.687  | -.492    |
|                 | Combined   | -.662  | -.174   | -.613  | -.710  | -.779  | -.318  | -.662   | -.896  | -1.755 | -.079    |
|                 | Total      | -.653  | -.171   | -.624  | -.682  | -.942  | 1.822  | -.514   | 1.371  | -2.962 | -.003**  |
| MHLCS           | Psychology | -.368  | -.156   | -.320  | -.417  | -.351  | -.152  | -.263   | -.439  | -2.594 | -.009**  |
| Chance          | Nutrition  | -.340  | -.133   | -.299  | -.380  | -.911  | 3.020  | -.284   | 2.105  | -.143  | -.886    |
|                 | Combined   | -.354  | -.155   | -.311  | -.397  | -.314  | -.133  | -.265   | -.363  | -.672  | -.501    |
|                 | Total      | -.354  | -.148   | -.329  | -.379  | -.545  | 1.853  | -.109   | -.980  | -1.552 | -.121    |
| MHLCS           | Psychology | -.404  | -.134   | -.362  | -.446  | -.441  | -.315  | -.259   | -.624  | -.000  | 1.000    |
| Powerful        | Nutrition  | -.418  | -.141   | -.374  | -.460  | -.804  | 2.244  | -.084   | 1.691  | -1.843 | -.065    |
| Others          | Combined   | -.407  | -.101   | -.379  | -.436  | -.434  | -.279  | -.331   | -.536  | -.577  | -.564    |
|                 | Total      | -.409  | -.124   | -.388  | -.430  | -.574  | 1.3880 | -.248   | -.900  | -1.601 | -.109    |

|              |            |        |       |        |        |        |       |        |        |        |          |
|--------------|------------|--------|-------|--------|--------|--------|-------|--------|--------|--------|----------|
| MHLCS        | Psychology | -.169  | -.082 | -.143  | -.194  | -.131  | -.093 | -.077  | -.185  | -.122  | -.262    |
| Doctors      | Nutrition  | -.171  | -.089 | -.144  | -.197  | -.657  | 2.668 | -.398  | 1.713  | -.686  | -.092    |
|              | Combined   | -.191  | -.147 | -.150  | -.232  | -.153  | -.070 | -.128  | -.179  | -.1384 | -.166    |
|              | Total      | -.178  | -.112 | -.159  | -.196  | -.338  | 1.635 | -.0462 | -.722  | -.2381 | -.017*   |
| MHLCS        | Psychology | -.235  | -.075 | -.212  | -.259  | -.268  | -.189 | -.159  | -.377  | -.118  | -.906    |
| Other People | Nutrition  | -.264  | -.129 | -.225  | -.304  | -.739  | 2.652 | -.311  | 1.788  | -.697  | -.090    |
|              | Combined   | -.245  | -.074 | -.224  | -.265  | -.252  | -.118 | -.209  | -.295  | -.213  | -.831    |
|              | Total      | -.248  | -.095 | -.232  | -.264  | -.438  | 1.626 | -.055  | -.820  | -.1186 | -.236    |
| MFI          | Psychology | 15.952 | 2.845 | 15.066 | 16.839 | 13.786 | 4.441 | 11.222 | 16.350 | -2.657 | -.008**  |
| General      | Nutrition  | 16.977 | 2.601 | 16.186 | 17.768 | 14.704 | 4.898 | 12.766 | 16.641 | -2.548 | -.011*   |
| Fatigue      | Combined   | 17.327 | 2.588 | 16.607 | 18.047 | 16.645 | 2.811 | 15.614 | 17.676 | -.854  | -.393    |
|              | Total      | 16.797 | 2.716 | 16.340 | 17.254 | 15.361 | 4.136 | 14.389 | 16.333 | -3.692 | -.001*** |
| MFI          | Psychology | 15.929 | 3.331 | 14.891 | 16.966 | 13.071 | 4.632 | 10.397 | 15.746 | -2.810 | -.005**  |
| Physical     | Nutrition  | 16.727 | 3.358 | 15.707 | 17.748 | 14.222 | 4.987 | 12.249 | 16.195 | -2.791 | -.005**  |
| Fatigue      | Combined   | 17.615 | 2.823 | 16.830 | 18.401 | 16.484 | 3.395 | 15.239 | 17.729 | -2.364 | -.018*   |
|              | Total      | 16.819 | 3.211 | 16.278 | 17.359 | 14.972 | 4.453 | 13.926 | 16.019 | -4.591 | -.001*** |
| MFI          | Psychology | 13.857 | 4.112 | 12.576 | 15.138 | 10.643 | 5.153 | 7.668  | 13.618 | -2.142 | -.032*   |
| Reduced      | Nutrition  | 14.136 | 4.027 | 12.912 | 15.361 | 12.259 | 5.012 | 10.277 | 14.242 | -2.164 | -.030*   |
| Activity     | Combined   | 14.962 | 3.662 | 13.942 | 15.981 | 14.936 | 3.777 | 13.550 | 16.321 | -.070  | -.944    |
|              | Total      | 14.362 | 3.921 | 13.702 | 15.022 | 13.097 | 4.798 | 11.970 | 14.225 | -2.421 | -.015*   |
| MFI          | Psychology | 10.357 | 4.287 | 9.021  | 11.693 | 7.286  | 4.214 | 4.853  | 9.719  | -2.131 | -.033*   |
| Reduced      | Nutrition  | 10.500 | 3.474 | 9.444  | 11.556 | 8.963  | 3.736 | 7.485  | 10.441 | -1.985 | -.047*   |
| Motivation   | Combined   | 11.462 | 3.153 | 10.584 | 12.339 | 10.774 | 3.095 | 9.639  | 11.910 | -1.082 | -.279    |
|              | Total      | 10.819 | 3.639 | 10.206 | 11.431 | 9.417  | 3.767 | 8.532  | 10.302 | -2.986 | -.003**  |
| MFI          | Psychology | 13.524 | 4.363 | 12.164 | 14.883 | 10.500 | 4.468 | 7.920  | 13.080 | -2.950 | -.003*   |

1  
2  
3  
4  
5  
6  
7  
8  
9  
10  
11  
12  
13  
14  
15  
16  
17  
18  
19  
20  
21  
22  
23  
24  
25  
26  
27  
28  
29  
30  
31  
32  
33  
34  
35  
36  
37  
38  
39  
40  
41  
42  
43  
44  
45  
46  
47  
48  
49

|                                    |            |        |       |        |        |        |       |        |        |        |         |
|------------------------------------|------------|--------|-------|--------|--------|--------|-------|--------|--------|--------|---------|
| Mental-Fatigue                     | Nutrition  | 13.682 | 4.328 | 12.366 | 14.998 | 11.926 | 5.334 | 9.816  | 14.036 | -2.082 | .037*   |
|                                    | Combined   | 13.846 | 4.345 | 12.637 | 15.056 | 12.613 | 3.827 | 11.209 | 14.017 | -1.586 | .113    |
|                                    | Total      | 13.696 | 4.315 | 12.969 | 14.422 | 11.944 | 4.568 | 10.871 | 13.018 | -3.661 | .001*** |
| CDC-CFS                            | Psychology | 2.571  | 3.109 | 1.603  | 3.540  | 1.429  | 2.278 | .114   | 2.744  | -1.365 | .172    |
| Sore-Throat                        | Nutrition  | 3.977  | 3.776 | 2.829  | 5.125  | 1.741  | 2.087 | .915   | 2.566  | -2.211 | .027*   |
|                                    | Combined   | 3.202  | 4.494 | 1.951  | 4.454  | 1.904  | 2.821 | .870   | 2.939  | -.804  | .422    |
|                                    | Total      | 3.257  | 3.898 | 2.601  | 3.914  | 1.750  | 2.437 | 1.178  | 2.323  | -2.387 | .017*   |
| CDC-CFS                            | Psychology | 1.976  | 3.382 | .922   | 3.030  | 1.786  | 3.378 | -.165  | 3.736  | -.341  | .733    |
| Swollen                            | Nutrition  | 5.561  | 6.491 | 3.587  | 7.534  | 5.000  | 6.760 | 2.326  | 7.674  | -2.212 | .027*   |
| Lymph-nodes                        | Combined   | 3.462  | 4.881 | 2.103  | 4.820  | 2.690  | 4.477 | 1.0458 | 4.332  | -.725  | .468    |
| Glands                             | Total      | 3.679  | 5.250 | 2.795  | 4.563  | 3.380  | 5.385 | 2.115  | 4.646  | -1.684 | .092    |
| CDC-CFS                            | Psychology | 2.071  | 3.249 | 1.059  | 3.084  | 1.643  | 2.818 | .016   | 3.270  | -.730  | .465    |
| DiarrhoeaDiarr<br>hea              | Nutrition  | 2.841  | 4.832 | 1.372  | 4.310  | 1.444  | 3.274 | .149   | 2.740  | -1.649 | .099    |
|                                    | Combined   | 3.135  | 3.773 | 2.084  | 4.185  | 1.631  | 2.483 | .720   | 2.542  | -1.996 | .046*   |
|                                    | Total      | 2.717  | 3.998 | 2.044  | 3.390  | 1.563  | 2.827 | -.899  | 2.228  | -2.481 | .013*   |
| CDC-CFS                            | Psychology | 13.286 | 6.271 | 11.331 | 15.240 | 11.071 | 6.673 | 7.218  | 14.925 | -1.550 | .121    |
| Fatigue after<br>exertion          | Nutrition  | 13.722 | 6.450 | 11.761 | 15.682 | 11.815 | 7.217 | 8.960  | 14.670 | -2.209 | .027*   |
|                                    | Combined   | 14.154 | 6.270 | 12.408 | 15.899 | 11.436 | 6.275 | 9.134  | 13.738 | -2.392 | .017*   |
|                                    | Total      | 13.752 | 6.292 | 12.693 | 14.811 | 11.507 | 6.629 | 9.949  | 13.065 | -3.574 | .001*** |
| CDC-CFS                            | Psychology | 8.286  | 6.747 | 6.183  | 10.388 | 7.429  | 6.892 | 3.450  | 11.408 | -2.145 | .032*   |
| Muscle-Aches<br>or-Muscle<br>Pains | Nutrition  | 9.091  | 6.383 | 7.151  | 11.031 | 7.222  | 6.278 | 4.739  | 9.706  | -2.901 | .004**  |
|                                    | Combined   | 8.519  | 6.932 | 6.589  | 10.449 | 6.188  | 5.528 | 4.160  | 8.215  | -1.908 | .056    |
|                                    | Total      | 8.630  | 6.664 | 7.509  | 9.752  | 6.817  | 6.029 | 5.400  | 8.234  | -3.995 | .001*** |
| CDC-CFS                            | Psychology | 3.476  | 5.334 | 1.814  | 5.138  | 2.786  | 4.458 | .212   | 5.360  | -1.778 | .075    |
| Pain-In-Joints                     | Nutrition  | 4.696  | 5.560 | 3.006  | 6.386  | 3.926  | 5.099 | 1.909  | 5.943  | -2.022 | .043*   |



|              |            |        |       |        |        |        |       |        |        |        |         |
|--------------|------------|--------|-------|--------|--------|--------|-------|--------|--------|--------|---------|
|              | Combined   | 5.474  | 6.386 | 3.696  | 7.251  | 3.010  | 4.140 | 1.492  | 4.528  | -1.840 | .066    |
|              | Total      | 4.618  | 5.837 | 3.635  | 5.600  | 3.310  | 4.543 | 2.242  | 4.377  | -3.141 | .002**  |
| CDC-CFS      | Psychology | 1.238  | 2.516 | .454   | 2.022  | 1.643  | 4.181 | -.771  | 4.057  | -.135  | .892    |
| Fever        | Nutrition  | 1.394  | 2.562 | -.615  | 2.173  | -.630  | 2.041 | -.178  | 1.437  | -1.487 | -.137   |
|              | Combined   | 1.333  | 3.909 | -.245  | 2.421  | -.378  | .709  | -.118  | .638   | -1.517 | -.129   |
|              | Total      | 1.324  | 3.106 | -.801  | 1.846  | -.718  | 2.272 | -.185  | 1.252  | -1.876 | -.061   |
| CDC-CFS      | Psychology | 3.357  | 4.637 | 1.912  | 4.802  | 2.571  | 4.398 | .032   | 5.111  | -1.970 | .049*   |
| Chills       | Nutrition  | 3.750  | 3.924 | 2.557  | 4.943  | 2.222  | 4.098 | -.601  | 3.843  | -3.401 | .001*** |
|              | Combined   | 3.192  | 4.343 | 1.983  | 4.402  | 1.908  | 2.797 | -.882  | 2.934  | -2.049 | .040*   |
|              | Total      | 3.420  | 4.283 | 2.699  | 4.141  | 2.155  | 3.614 | -1.306 | 3.004  | -4.206 | .001*** |
| CDC-CFS      | Psychology | 12.905 | 6.792 | 10.788 | 15.021 | 10.643 | 6.698 | 6.776  | 14.510 | -.802  | .422    |
| Unrefreshing | Nutrition  | 12.250 | 7.088 | 10.095 | 14.405 | 9.444  | 7.738 | 6.384  | 12.505 | -1.421 | .155    |
| Sleep        | Combined   | 12.154 | 7.147 | 10.164 | 14.143 | 10.161 | 7.959 | 7.242  | 13.080 | -1.513 | .130    |
|              | Total      | 12.413 | 6.978 | 11.238 | 13.588 | 9.986  | 7.557 | 8.210  | 11.762 | -2.295 | .022*   |
| CDC-CFS      | Psychology | 9.286  | 7.658 | 6.899  | 11.672 | 5.286  | 4.921 | 2.444  | 8.127  | -1.738 | .082    |
| Sleeping     | Nutrition  | 8.614  | 7.317 | 6.389  | 10.838 | 9.482  | 9.200 | 5.842  | 13.121 | -.190  | .849    |
| Problems     | Combined   | 8.904  | 7.681 | 6.766  | 11.042 | 6.529  | 6.749 | 4.053  | 9.004  | -1.794 | .073    |
|              | Total      | 8.928  | 7.509 | 7.664  | 10.192 | 7.394  | 7.585 | 5.612  | 9.177  | -1.983 | .047*   |
| CDC-CFS      | Psychology | 5.262  | 5.548 | 3.533  | 6.991  | 4.357  | 3.411 | 2.388  | 6.326  | -1.200 | .230    |
| Headaches    | Nutrition  | 7.646  | 7.040 | 5.506  | 9.786  | 5.185  | 6.294 | 2.695  | 7.675  | -2.084 | .037*   |
|              | Combined   | 6.346  | 5.857 | 4.715  | 7.977  | 4.050  | 3.527 | 2.756  | 5.343  | -2.807 | .005**  |
|              | Total      | 6.431  | 6.200 | 5.387  | 7.474  | 4.535  | 4.708 | 3.429  | 5.642  | -3.000 | .003**  |
| CDC-CFS      | Psychology | 6.333  | 4.996 | 4.777  | 7.890  | 3.500  | 3.995 | 1.193  | 5.807  | -1.965 | .049*   |
| Memory       | Nutrition  | 9.409  | 7.183 | 7.225  | 11.593 | 8.667  | 7.681 | 5.628  | 11.705 | -.338  | .735    |
| Problems     | Combined   | 8.173  | 7.610 | 6.055  | 10.292 | 6.148  | 4.905 | 4.349  | 7.947  | -1.446 | .148    |

|                |            |       |       |       |        |       |       |       |        |        |         |
|----------------|------------|-------|-------|-------|--------|-------|-------|-------|--------|--------|---------|
|                | Total      | 8.007 | 6.835 | 6.857 | 9.158  | 6.578 | 6.189 | 5.123 | 8.032  | -2.053 | .040*   |
| CDC-CFS        | Psychology | 8.500 | 6.094 | 6.601 | 10.399 | 5.143 | 5.559 | 1.933 | 8.353  | -2.809 | .005**  |
| Difficulty     | Nutrition  | 9.822 | 7.641 | 7.499 | 12.145 | 7.778 | 6.941 | 5.032 | 10.524 | -1.196 | .232    |
| Concentrating  | Combined   | 9.135 | 6.942 | 7.202 | 11.067 | 6.507 | 4.843 | 4.731 | 8.283  | -1.899 | .058    |
|                | Total      | 9.161 | 6.903 | 7.999 | 10.323 | 6.718 | 5.844 | 5.345 | 8.092  | -3.440 | .001*** |
| CDC-CFS        | Psychology | 3.476 | 4.845 | 1.966 | 4.986  | 2.286 | 2.946 | .585  | 3.987  | -.213  | .832    |
| Nausea         | Nutrition  | 4.769 | 5.135 | 3.208 | 6.330  | 3.407 | 5.746 | 1.134 | 5.681  | -1.686 | .092    |
|                | Combined   | 3.327 | 4.902 | 1.962 | 4.692  | 3.458 | 3.585 | 2.144 | 4.773  | -.855  | .392    |
|                | Total      | 3.832 | 4.966 | 2.996 | 4.668  | 3.211 | 4.396 | 2.178 | 4.244  | -.584  | .559    |
| CDC-CFS        | Psychology | 2.548 | 3.270 | 1.529 | 3.567  | 2.786 | 4.003 | -.474 | 5.097  | -.343  | .732    |
| Abdominal      | Nutrition  | 5.064 | 5.165 | 3.493 | 6.634  | 3.593 | 3.905 | 2.048 | 5.137  | -1.968 | .049*   |
| Pain           | Combined   | 3.750 | 4.635 | 2.460 | 5.041  | 2.548 | 2.791 | 1.524 | 3.572  | -.598  | .550    |
|                | Total      | 3.803 | 4.535 | 3.040 | 4.566  | 2.986 | 3.470 | 2.171 | 3.801  | -1.727 | .084    |
| CDC-CFS        | Psychology | 3.524 | 4.702 | 2.059 | 4.989  | 2.357 | 2.437 | .950  | 3.764  | -.724  | .469    |
| Sinus-Nasal    | Nutrition  | 5.469 | 6.476 | 3.500 | 7.438  | 4.889 | 6.104 | 2.474 | 7.304  | -1.400 | .162    |
| Symptoms       | Combined   | 4.789 | 6.304 | 3.034 | 6.544  | 3.804 | 6.710 | 1.343 | 6.266  | -2.482 | .013*   |
|                | Total      | 4.620 | 5.931 | 3.622 | 5.619  | 3.930 | 5.882 | 2.547 | 5.312  | -2.971 | .003**  |
| CDC-CFS        | Psychology | 3.000 | 4.191 | 1.694 | 4.306  | 1.571 | 2.209 | .296  | 2.847  | -1.556 | .120    |
| Shortness-Of   | Nutrition  | 3.285 | 4.090 | 2.026 | 4.543  | 2.407 | 4.060 | .801  | 4.013  | -1.849 | .064    |
| Breath         | Combined   | 3.392 | 4.788 | 2.046 | 4.739  | 2.526 | 3.631 | 1.194 | 3.858  | -.976  | .329    |
|                | Total      | 3.237 | 4.365 | 2.497 | 3.977  | 2.296 | 3.554 | 1.461 | 3.131  | -2.538 | .011*   |
| CDC-CFS        | Psychology | 3.429 | 5.347 | 1.762 | 5.095  | 1.214 | 2.517 | -.239 | 2.668  | -1.973 | .049*   |
| Sensitivity-To | Nutrition  | 5.031 | 6.097 | 3.177 | 6.884  | 4.111 | 6.198 | 1.659 | 6.563  | -2.136 | .033*   |
| Light          | Combined   | 4.481 | 6.360 | 2.710 | 6.251  | 3.297 | 5.557 | 1.259 | 5.335  | -.787  | .431    |
|                | Total      | 4.336 | 5.975 | 3.330 | 5.342  | 3.197 | 5.419 | 1.924 | 4.471  | -2.542 | .011*   |

1  
2  
3  
4  
5  
6  
7  
8  
9  
10  
11  
12  
13  
14  
15  
16  
17  
18  
19  
20  
21  
22  
23  
24  
25  
26  
27  
28  
29  
30  
31  
32  
33  
34  
35  
36  
37  
38  
39  
40  
41  
42  
43  
44  
45  
46  
47  
48  
49

|              |            |        |        |        |         |        |        |        |        |        |         |
|--------------|------------|--------|--------|--------|---------|--------|--------|--------|--------|--------|---------|
| CDC-CFS      | Psychology | 3.952  | 3.938  | 2.725  | 5.180   | 1.571  | 3.228  | -.292  | 3.435  | -1.614 | -.106   |
| Depression   | Nutrition  | 4.477  | 5.450  | 2.821  | 6.134   | 3.333  | 4.883  | 1.402  | 5.265  | -1.584 | -.113   |
|              | Combined   | 5.077  | 5.950  | 3.420  | 6.734   | 2.766  | 3.324  | 1.547  | 3.985  | -1.304 | -.192   |
|              | Total      | 4.544  | 5.230  | 3.663  | 5.424   | 2.747  | 3.964  | 1.815  | 3.678  | -2.297 | .022*   |
| CDC-CFS      | Psychology | 94.381 | 16.836 | 89.134 | 99.628  | 78.571 | 18.434 | 67.928 | 89.215 | -3.111 | .002**  |
| Maladaptive  | Nutrition  | 96.386 | 21.946 | 89.714 | 103.059 | 85.259 | 27.665 | 74.315 | 96.203 | -3.443 | .001*** |
| Stress-Index | Combined   | 98.269 | 19.165 | 92.934 | 103.605 | 87.484 | 22.965 | 79.060 | 95.908 | -2.215 | .027*   |
| Scale-Score  | Total      | 96.486 | 19.373 | 93.225 | 99.747  | 84.917 | 24.004 | 79.276 | 90.557 | -5.123 | .001*** |

\*z-statistic for Wilcoxon Signed-Rank Test

Table 3. Change score comparisons between intervention groups

|                               |            | % change over time for sig. results <sup>a</sup> | Mean    | Std. Deviation | Std. Error | 95% CI for Mean |         | H <sup>b</sup> | p-value |
|-------------------------------|------------|--------------------------------------------------|---------|----------------|------------|-----------------|---------|----------------|---------|
|                               |            |                                                  |         |                |            | Lower           | Upper   |                |         |
| SF-36<br>Physical Functioning | Psychology | 16.75                                            | -13.629 | 14.990         | 4.006      | -22.285         | -4.974  | 3.215          | .200    |
|                               | Nutrition  |                                                  | -.407   | 19.967         | 3.843      | -8.306          | 7.492   |                |         |
|                               | Combined   |                                                  | -6.813  | 18.242         | 3.276      | -13.505         | -.122   |                |         |
|                               | Total      | 5.80                                             | -5.736  | 18.744         | 2.209      | -10.141         | -1.332  |                |         |
| SF-36                         | Psychology | 84.61                                            | -33.929 | 39.960         | 10.680     | -57.001         | -10.856 | 1.558          | .459    |

1  
2  
3  
4  
5  
6  
7  
8  
9  
10  
11  
12  
13  
14  
15  
16  
17  
18  
19  
20  
21  
22  
23  
24  
25  
26  
27  
28  
29  
30  
31  
32  
33  
34  
35  
36  
37  
38  
39  
40  
41  
42  
43  
44  
45  
46  
47  
48  
49

|                            |            |       |         |        |        |         |         |       |       |
|----------------------------|------------|-------|---------|--------|--------|---------|---------|-------|-------|
| Role limitations physical  | Nutrition  | 61.05 | -14.509 | 21.005 | 4.042  | -22.818 | -6.199  |       |       |
|                            | Combined   | 57.02 | -13.871 | 31.457 | 5.650  | -25.409 | -2.333  |       |       |
|                            | Total      | 63.32 | -18.010 | 30.564 | 3.602  | -25.192 | -10.828 |       |       |
| SF-36                      | Psychology |       | -6.071  | 15.588 | 4.166  | -15.072 | 2.929   | .163  | -.922 |
| Bodily pain                | Nutrition  |       | -6.574  | 18.800 | 3.618  | -14.011 | .863    |       |       |
|                            | Combined   |       | -3.387  | 25.532 | 4.586  | -12.752 | 5.978   |       |       |
|                            | Total      | 5.17  | -5.104  | 21.252 | 2.505  | -10.098 | -1.10   |       |       |
| SF-36                      | Psychology | 37.81 | -24.107 | 24.741 | 6.612  | -38.392 | -9.822  | 3.301 | -.192 |
| Social functioning         | Nutrition  | 24.93 | -10.648 | 20.423 | 3.931  | -18.727 | -2.569  |       |       |
|                            | Combined   | 22.60 | -11.290 | 24.013 | 4.313  | -20.098 | -2.482  |       |       |
|                            | Total      | 26.17 | -13.542 | 23.149 | 2.728  | -18.981 | -8.102  |       |       |
| SF-36                      | Psychology | 19.15 | -12.000 | 14.294 | 3.820  | -20.253 | -3.747  | 4.404 | -.111 |
| General mental health      | Nutrition  |       | -3.259  | 15.963 | 3.072  | -9.574  | 3.056   |       |       |
|                            | Combined   |       | -.645   | 16.911 | 3.037  | -6.848  | 5.558   |       |       |
|                            | Total      | 10.58 | -3.833  | 16.409 | 1.934  | -7.689  | -.022   |       |       |
| SF-36                      | Psychology |       | -9.527  | 49.664 | 13.273 | -38.202 | 19.148  | -.573 | -.751 |
| Role limitations emotional | Nutrition  |       | -18.561 | 55.759 | 10.731 | -40.618 | 3.497   |       |       |
|                            | Combined   | 29.47 | -18.284 | 52.240 | 9.383  | -37.446 | .878    |       |       |
|                            | Total      | 10.58 | -16.685 | 52.496 | 6.187  | -29.021 | -4.349  |       |       |
| SF-36                      | Psychology | 49.57 | -17.500 | 15.902 | 4.250  | -26.682 | -8.318  | 4.988 | -.083 |
| Vitality Energy or Fatigue | Nutrition  | 35.35 | -11.482 | 19.206 | 3.696  | -19.079 | -3.884  |       |       |
|                            | Combined   |       | -6.129  | 17.688 | 3.177  | -12.617 | .359    |       |       |
|                            | Total      | 22.30 | -10.347 | 18.219 | 2.147  | -14.628 | -6.066  |       |       |
| SF-36                      | Psychology | 19.01 | -11.429 | 14.335 | 3.831  | -19.705 | -3.152  | -.627 | -.731 |
| General health             | Nutrition  | 29.73 | -6.852  | 15.201 | 2.925  | -12.865 | -.839   |       |       |

1  
2  
3  
4  
5  
6  
7  
8  
9  
10  
11  
12  
13  
14  
15  
16  
17  
18  
19  
20  
21  
22  
23  
24  
25  
26  
27  
28  
29  
30  
31  
32  
33  
34  
35  
36  
37  
38  
39  
40  
41  
42  
43  
44  
45  
46  
47  
48  
49

|                       |            |       |         |        |        |         |        |       |       |
|-----------------------|------------|-------|---------|--------|--------|---------|--------|-------|-------|
| perceptions           | Combined   | 26.45 | -10.161 | 22.154 | 3.97   | -18.288 | -2.035 |       |       |
|                       | Total      | 36.49 | -9.167  | 18.251 | 2.151  | -13.455 | -4.878 |       |       |
| MHLCS Internal        | Psychology | 17.56 | -.146   | -.203  | -.054  | -.263   | -.029  | 3.402 | -.183 |
|                       | Nutrition  |       | -.573   | 3.028  | -.583  | -1.771  | -.625  |       |       |
|                       | Combined   |       | -.106   | -.315  | -.057  | -.222   | .010   |       |       |
|                       | Total      | 30.67 | -.289   | 1.859  | -.219  | -.726   | -.148  |       |       |
| MHLCS Chance          | Psychology | 4.67  | .077    | -.098  | -.026  | .021    | -.134  | 7.674 | .022* |
|                       | Nutrition  |       | -.570   | 3.019  | -.581  | -1.765  | -.624  |       |       |
|                       | Combined   |       | -.001   | -.081  | -.015  | -.029   | .031   |       |       |
|                       | Total      |       | -.198   | 1.852  | -.218  | -.633   | -.237  |       |       |
| MHLCS Powerful Others | Psychology |       | -.054   | -.284  | -.076  | -.218   | -.109  | 1.571 | -.456 |
|                       | Nutrition  |       | -.375   | 2.282  | -.439  | -1.277  | -.528  |       |       |
|                       | Combined   |       | -.030   | -.277  | -.050  | -.132   | .072   |       |       |
|                       | Total      |       | -.164   | 1.408  | -.166  | -.495   | -.167  |       |       |
| MHLCS Doctors         | Psychology |       | .020    | -.058  | -.0155 | -.014   | -.053  | 0.076 | -.963 |
|                       | Nutrition  |       | -.492   | 2.678  | -.515  | -1.551  | -.568  |       |       |
|                       | Combined   |       | -.057   | -.199  | -.036  | -.016   | -.130  |       |       |
|                       | Total      | 47.49 | -.156   | 1.647  | -.194  | -.543   | -.231  |       |       |
| MHLCS Other People    | Psychology |       | -.032   | -.166  | -.044  | -.128   | -.064  | 2.479 | -.290 |
|                       | Nutrition  |       | -.446   | 2.692  | -.518  | -1.510  | -.619  |       |       |
|                       | Combined   |       | -.012   | -.096  | -.017  | -.047   | .023   |       |       |
|                       | Total      |       | -.178   | 1.645  | -.193  | -.565   | -.208  |       |       |

|                       |            |       |       |       |      |        |       |       |       |
|-----------------------|------------|-------|-------|-------|------|--------|-------|-------|-------|
| MFI                   | Psychology | 13.58 | 2.571 | 2.766 | .739 | .975   | 4.168 | 6.790 | .034* |
| General Fatigue       | Nutrition  | 13.39 | 2.074 | 3.842 | .740 | .554   | 3.594 |       |       |
|                       | Combined   |       | .419  | 2.233 | .401 | -.400  | 1.238 |       |       |
|                       | Total      | 8.55  | 1.458 | 3.126 | .368 | .724   | 2.193 |       |       |
| MFI                   | Psychology | 17.74 | 2.857 | 2.797 | .748 | 1.242  | 4.472 | 3.038 | .219  |
| Physical Fatigue      | Nutrition  | 15.00 | 2.444 | 4.371 | .841 | .716   | 4.173 |       |       |
|                       | Combined   | 6.42  | 1.290 | 2.735 | .491 | .287   | 2.294 |       |       |
|                       | Total      | 10.98 | 2.028 | 3.468 | .409 | 1.213  | 2.843 |       |       |
| MFI                   | Psychology | 23.20 | 1.857 | 2.932 | .784 | .165   | 3.550 | 1.734 | .420  |
| Reduced Activity      | Nutrition  | 13.28 | 1.148 | 2.685 | .517 | .086   | 2.210 |       |       |
|                       | Combined   |       | .645  | 3.189 | .572 | -.525  | 1.815 |       |       |
|                       | Total      | 8.81  | 1.069 | 2.952 | .348 | .376   | 1.763 |       |       |
| MFI                   | Psychology | 11.42 | 2.500 | 3.502 | .936 | .478   | 4.522 | 5.171 | .075  |
| Reduced Motivation    | Nutrition  | 14.64 | 1.593 | 3.511 | .676 | .204   | 2.982 |       |       |
|                       | Combined   |       | .129  | 3.471 | .624 | -1.144 | 1.402 |       |       |
|                       | Total      | 12.96 | 1.139 | 3.570 | .421 | .300   | 1.978 |       |       |
| MFI                   | Psychology | 29.66 | 3.571 | 3.056 | .817 | 1.807  | 5.336 | 4.551 | .103  |
| Mental Fatigue        | Nutrition  | 12.83 | 1.519 | 3.631 | .699 | .082   | 2.955 |       |       |
|                       | Combined   |       | 1.161 | 4.267 | .766 | -.404  | 2.726 |       |       |
|                       | Total      | 12.79 | 1.764 | 3.880 | .457 | .852   | 2.676 |       |       |
| CDC-CFS               | Psychology |       | 1.429 | 3.736 | .998 | .728   | 3.586 | 1.298 | .523  |
| Sore Throat           | Nutrition  | 56.23 | 1.185 | 2.661 | .512 | .133   | 2.238 |       |       |
|                       | Combined   |       | .500  | 4.591 | .825 | -1.184 | 2.184 |       |       |
|                       | Total      | 46.26 | .937  | 3.769 | .444 | .052   | 1.823 |       |       |
| CDC-CFS Swollen Lymph | Psychology |       | -.143 | 2.932 | .784 | -1.835 | 1.550 | 0.462 | .794  |

1  
2  
3  
4  
5  
6  
7  
8  
9  
10  
11  
12  
13  
14  
15  
16  
17  
18  
19  
20  
21  
22  
23  
24  
25  
26  
27  
28  
29  
30  
31  
32  
33  
34  
35  
36  
37  
38  
39  
40  
41  
42  
43  
44  
45  
46  
47  
48  
49

|                                         |            |       |       |       |       |        |       |       |       |
|-----------------------------------------|------------|-------|-------|-------|-------|--------|-------|-------|-------|
| Lymph Nodes-Glands                      | Nutrition  | 10.09 | 1.247 | 2.700 | -.520 | -.179  | 2.316 |       |       |
|                                         | Combined   |       | -.794 | 6.549 | 1.176 | -1.608 | 3.197 |       |       |
|                                         | Total      |       | -.782 | 4.756 | -.560 | -.336  | 1.900 |       |       |
| CDC-CFS<br>Diarrhoea/Diarrhea           | Psychology |       | -.286 | 1.490 | -.398 | -1.146 | -.575 | 3.619 | -.164 |
|                                         | Nutrition  |       | -.926 | 2.868 | -.552 | -.209  | 2.060 |       |       |
|                                         | Combined   | 47.97 | 1.272 | 3.789 | -.681 | -.118  | 2.662 |       |       |
|                                         | Total      | 42.47 | -.839 | 3.134 | -.369 | -.103  | 1.576 |       |       |
| CDC-CFS Fatigue after<br>exertion       | Psychology |       | 2.286 | 4.811 | 1.286 | -.492  | 5.063 | 0.379 | -.827 |
|                                         | Nutrition  | 13.90 | 2.593 | 5.507 | 1.060 | -.414  | 4.771 |       |       |
|                                         | Combined   | 19.20 | 2.532 | 5.578 | 1.002 | -.486  | 4.578 |       |       |
|                                         | Total      | 16.32 | 2.507 | 5.339 | -.629 | 1.252  | 3.761 |       |       |
| CDC-CFS Muscle Aches<br>or Muscle Pains | Psychology | 10.34 | 2.500 | 4.034 | 1.078 | -.171  | 4.829 | 0.469 | -.791 |
|                                         | Nutrition  | 20.56 | 2.333 | 3.637 | -.700 | -.894  | 3.772 |       |       |
|                                         | Combined   |       | 2.070 | 5.335 | -.958 | -.113  | 4.027 |       |       |
|                                         | Total      | 21.01 | 2.253 | 4.459 | -.526 | 1.205  | 3.300 |       |       |
| CDC-CFS<br>Pain In Joints               | Psychology |       | 1.857 | 4.036 | 1.079 | -.473  | 4.187 | 0.054 | -.973 |
|                                         | Nutrition  | 16.40 | 1.393 | 3.721 | -.716 | -.079  | 2.865 |       |       |
|                                         | Combined   |       | 1.978 | 5.622 | 1.010 | -.084  | 4.040 |       |       |
|                                         | Total      | 28.32 | 1.735 | 4.634 | -.546 | -.646  | 2.824 |       |       |
| CDC-CFS Fever                           | Psychology |       | -.214 | 1.968 | -.526 | -1.351 | -.922 | 0.399 | -.819 |
|                                         | Nutrition  |       | -.604 | 2.311 | -.445 | -.310  | 1.519 |       |       |
|                                         | Combined   |       | 1.245 | 4.816 | -.865 | -.521  | 3.012 |       |       |
|                                         | Total      |       | -.721 | 3.573 | -.421 | -.118  | 1.561 |       |       |
| CDC-CFS Chills                          | Psychology | 23.40 | 1.571 | 2.738 | -.732 | -.009  | 3.152 | 1.517 | -.468 |
|                                         | Nutrition  | 40.74 | 2.148 | 3.097 | -.596 | -.923  | 3.373 |       |       |

1  
2  
3  
4  
5  
6  
7  
8  
9  
10  
11  
12  
13  
14  
15  
16  
17  
18  
19  
20  
21  
22  
23  
24  
25  
26  
27  
28  
29  
30  
31  
32  
33  
34  
35  
36  
37  
38  
39  
40  
41  
42  
43  
44  
45  
46  
47  
48  
49

|                                  |            |       |        |        |       |        |       |       |        |
|----------------------------------|------------|-------|--------|--------|-------|--------|-------|-------|--------|
|                                  | Combined   | 40.23 | 1.447  | 3.986  | .716  | -.015  | 2.909 |       |        |
|                                  | Total      | 37.00 | 1.734  | 3.421  | -.403 | -.930  | 2.538 |       |        |
| CDC-CFS Unrefreshing Sleep       | Psychology |       | 1.857  | 6.803  | 1.818 | -2.071 | 5.785 | 0.160 | .948   |
|                                  | Nutrition  |       | 2.148  | 6.904  | 1.329 | -.583  | 4.879 |       |        |
|                                  | Combined   |       | 1.581  | 5.726  | 1.029 | -.520  | 3.681 |       |        |
|                                  | Total      | 19.55 | 1.847  | 6.3123 | -.744 | -.364  | 3.331 |       |        |
| CDC-CFS Sleeping Problems        | Psychology |       | 2.786  | 5.352  | 1.430 | -.304  | 5.876 | 3.218 | .200   |
|                                  | Nutrition  |       | -.222  | 5.139  | -.989 | -2.255 | 1.811 |       |        |
|                                  | Combined   |       | 1.762  | 4.871  | -.875 | -.025  | 3.548 |       |        |
|                                  | Total      | 17.17 | 1.217  | 5.133  | -.605 | -.011  | 2.423 |       |        |
| CDC-CFS Headaches                | Psychology |       | -.7143 | 2.091  | -.559 | -1.922 | -.493 | 6.625 | -.036* |
|                                  | Nutrition  | 32.19 | 1.572  | 3.507  | -.675 | -.184  | 2.959 |       |        |
|                                  | Combined   | 36.18 | 2.467  | 4.944  | -.888 | -.653  | 4.280 |       |        |
|                                  | Total      | 29.32 | 1.512  | 4.124  | -.486 | -.543  | 2.482 |       |        |
| CDC-CFS Memory Problems          | Psychology | 44.73 | 2.857  | 4.655  | 1.244 | -.169  | 5.545 | 2.316 | -.314  |
|                                  | Nutrition  |       | -.111  | 4.925  | -.947 | -2.059 | 1.837 |       |        |
|                                  | Combined   |       | 1.949  | 6.011  | 1.080 | -.256  | 4.154 |       |        |
|                                  | Total      | 17.86 | 1.353  | 5.435  | -.641 | -.076  | 2.630 |       |        |
| CDC-CFS Difficulty Concentrating | Psychology | 39.50 | 4.643  | 4.534  | 1.212 | 2.025  | 7.261 | 5.945 | -.051  |
|                                  | Nutrition  |       | -.815  | 4.359  | -.839 | -.910  | 2.539 |       |        |
|                                  | Combined   |       | 2.170  | 5.877  | 1.056 | -.015  | 4.326 |       |        |
|                                  | Total      | 26.66 | 2.143  | 5.217  | -.615 | -.917  | 3.369 |       |        |
| CDC-CFS Nausea                   | Psychology |       | -.143  | 2.770  | -.740 | -1.456 | 1.742 | 4.773 | -.092  |
|                                  | Nutrition  |       | -.660  | 2.667  | -.513 | -.395  | 1.716 |       |        |
|                                  | Combined   |       | -.251  | 4.468  | -.803 | -1.388 | 1.890 |       |        |



1  
2  
3  
4  
5  
6  
7  
8  
9  
10  
11  
12  
13  
14  
15  
16  
17  
18  
19  
20  
21  
22  
23  
24  
25  
26  
27  
28  
29  
30  
31  
32  
33  
34  
35  
36  
37  
38  
39  
40  
41  
42  
43  
44  
45  
46  
47  
48  
49

|                                              |            |       |  |        |        |       |       |        |       |       |
|----------------------------------------------|------------|-------|--|--------|--------|-------|-------|--------|-------|-------|
|                                              | Total      |       |  | .384   | 3.535  | .417  | -.447 | 1.214  |       |       |
| CDC-CFS-Abdominal Pain                       | Psychology |       |  | -.286  | 1.729  | -.462 | -.713 | 1.284  | 1.082 | -.582 |
|                                              | Nutrition  | 29.05 |  | -.882  | 2.165  | -.417 | -.025 | 1.738  |       |       |
|                                              | Combined   |       |  | -.839  | 4.390  | -.789 | -.771 | 2.449  |       |       |
|                                              | Total      |       |  | -.747  | 3.234  | -.381 | -.013 | 1.507  |       |       |
| CDC-CFS-Sinus-Nasal Symptoms                 | Psychology |       |  | -.929  | 3.125  | -.835 | -.876 | 2.733  | 1.255 | -.534 |
|                                              | Nutrition  |       |  | 1.060  | 4.193  | -.807 | -.599 | 2.719  |       |       |
|                                              | Combined   | 20.56 |  | 1.906  | 5.923  | 1.063 | -.267 | 4.078  |       |       |
|                                              | Total      | 14.95 |  | 1.399  | 4.822  | -.568 | -.266 | 2.532  |       |       |
| CDC-CFS-Shortness-Of-Breath                  | Psychology |       |  | 1.500  | 3.459  | -.924 | -.497 | 3.497  | 0.707 | -.702 |
|                                              | Nutrition  | 18.28 |  | -.779  | 2.057  | -.403 | -.052 | 1.609  |       |       |
|                                              | Combined   |       |  | -.690  | 3.972  | -.725 | -.793 | 2.173  |       |       |
|                                              | Total      | 29.08 |  | -.885  | 3.243  | -.388 | -.112 | 1.658  |       |       |
| CDC-CFS-Sensitivity-To-Light                 | Psychology | 64.58 |  | 1.429  | 2.472  | -.661 | -.001 | 2.856  | 0.939 | -.625 |
|                                              | Nutrition  |       |  | 1.568  | 3.764  | -.725 | -.079 | 3.057  |       |       |
|                                              | Combined   |       |  | -.961  | 5.178  | -.930 | -.938 | 2.860  |       |       |
|                                              | Total      | 26.26 |  | 1.280  | 4.209  | -.496 | -.291 | 2.269  |       |       |
| CDC-CFS-Depression                           | Psychology |       |  | 1.429  | 3.502  | -.936 | -.593 | 3.451  | 0.490 | -.783 |
|                                              | Nutrition  |       |  | -.704  | 3.268  | -.629 | -.589 | 1.996  |       |       |
|                                              | Combined   |       |  | 1.363  | 5.345  | -.960 | -.598 | 3.323  |       |       |
|                                              | Total      | 39.55 |  | 1.129  | 4.282  | -.505 | -.122 | 2.135  |       |       |
| CDC-CFS-Maladaptive Stress-Index-Scale-Score | Psychology | 16.75 |  | 16.286 | 13.234 | 3.537 | 8.645 | 23.927 | 4.379 | -.112 |
|                                              | Nutrition  | 11.54 |  | 12.815 | 17.802 | 3.426 | 5.772 | 19.857 |       |       |
|                                              | Combined   | 10.98 |  | 9.613  | 26.424 | 4.746 | -.080 | 19.305 |       |       |
|                                              | Total      | 11.99 |  | 12.111 | 21.201 | 2.499 | 7.129 | 17.093 |       |       |

<sup>a</sup>see table 2 for descriptive and inferential statistics

<sup>b</sup>H-statistic for Kruskal-Wallis test, d.f. = 2

\* significant at the .05 level

**Table 1. Demographics for gender, age and illness duration across the three treatment groups**

|                  |            | Mean                    | SD     | 95% CI for Mean |        | Test statistic    | p-value |
|------------------|------------|-------------------------|--------|-----------------|--------|-------------------|---------|
|                  |            |                         |        | Lower           | Upper  |                   |         |
| Gender           | Psychology | 9 (21.4%) <sup>d</sup>  |        |                 |        | .179 <sup>c</sup> | .915    |
|                  | Nutrition  | 8 (18.2%) <sup>d</sup>  |        |                 |        |                   |         |
|                  | Combined   | 11 (21.2%) <sup>d</sup> |        |                 |        |                   |         |
|                  | Total      | 28 (20.3%) <sup>d</sup> |        |                 |        |                   |         |
| Age              | Psychology | 42.881                  | 13.986 | 38.523          | 47.239 | .000 <sup>a</sup> | 1.000   |
|                  | Nutrition  | 42.864                  | 12.504 | 39.062          | 46.665 |                   |         |
|                  | Combined   | 42.843                  | 11.125 | 39.714          | 45.972 |                   |         |
|                  | Total      | 42.861                  | 12.406 | 40.765          | 44.957 |                   |         |
| Illness duration | Psychology | 8.874                   | 8.252  | 6.302           | 11.445 | .252 <sup>a</sup> | .778    |
|                  | Nutrition  | 10.023                  | 7.375  | 7.781           | 12.265 |                   |         |
|                  | Combined   | 9.625                   | 7.291  | 7.595           | 11.655 |                   |         |
|                  | Total      | 9.523                   | 7.580  | 8.247           | 10.800 |                   |         |

**Table 2. Comparisons across time within the primary outcome measures**

|                |            | Baseline |        |                 |        | 3-month follow-up |        |                 |        | Comparisons |         |
|----------------|------------|----------|--------|-----------------|--------|-------------------|--------|-----------------|--------|-------------|---------|
|                |            | Mean     | SD     | 95% CI for Mean |        | Mean              | SD     | 95% CI for Mean |        | z-statistic | p-value |
|                |            |          |        | Lower           | Upper  |                   |        | Lower           | Upper  |             |         |
| SF-36          | Psychology | 49.339   | 22.698 | 42.266          | 56.413 | 59.267            | 30.346 | 41.745          | 76.788 | -2.707      | .007**  |
| Physical       | Nutrition  | 47.855   | 26.226 | 39.882          | 55.829 | 46.706            | 30.744 | 34.544          | 58.868 | -1.136      | .256    |
| Functioning    | Combined   | 45.299   | 25.479 | 38.206          | 52.393 | 49.288            | 26.403 | 39.604          | 58.973 | -1.850      | .064    |
|                | Total      | 47.344   | 24.791 | 43.171          | 51.517 | 50.260            | 28.818 | 43.488          | 57.032 | -3.120      | .002**  |
| SF-36          | Psychology | 7.143    | 15.894 | 2.190           | 12.096 | 46.429            | 39.048 | 23.883          | 68.974 | -2.379      | .017*   |
| Role           | Nutrition  | 7.574    | 17.500 | 2.254           | 12.895 | 19.444            | 20.016 | 11.526          | 27.363 | -2.907      | .004**  |
| limitations    | Combined   | 9.774    | 21.051 | 3.914           | 15.635 | 22.742            | 25.161 | 13.513          | 31.971 | -2.225      | .026*   |
| physical       | Total      | 8.272    | 18.387 | 5.177           | 11.367 | 26.111            | 28.225 | 19.479          | 32.744 | -4.354      | .001*** |
| SF-36          | Psychology | 61.548   | 25.614 | 53.566          | 69.530 | 63.929            | 29.786 | 46.731          | 81.127 | -1.196      | .232    |
| Bodily pain    | Nutrition  | 55.625   | 30.242 | 46.434          | 64.819 | 58.889            | 32.943 | 45.857          | 71.921 | -1.800      | .072    |
|                | Combined   | 53.606   | 27.019 | 46.084          | 61.128 | 58.629            | 27.301 | 48.615          | 68.643 | -1.048      | .294    |
|                | Total      | 56.667   | 27.683 | 52.007          | 61.327 | 59.757            | 29.649 | 52.790          | 66.724 | -2.240      | .025*   |
| SF-36          | Psychology | 37.202   | 21.824 | 30.402          | 44.003 | 59.821            | 33.318 | 40.584          | 79.058 | -2.689      | .007**  |
| Social         | Nutrition  | 32.671   | 25.888 | 24.800          | 40.541 | 43.519            | 33.679 | 30.196          | 56.841 | -2.476      | .013*   |
| functioning    | Combined   | 32.452   | 24.786 | 25.551          | 39.352 | 41.936            | 28.604 | 31.443          | 52.428 | -2.426      | .015*   |
|                | Total      | 33.967   | 24.212 | 29.892          | 38.043 | 46.007            | 31.805 | 38.533          | 53.481 | -4.504      | .001*** |
| SF-36          | Psychology | 60.286   | 19.584 | 54.183          | 66.389 | 74.571            | 13.276 | 66.906          | 82.237 | -2.497      | .013*   |
| General mental | Nutrition  | 59.727   | 19.355 | 53.843          | 65.612 | 64.741            | 20.548 | 56.612          | 72.869 | -1.696      | .090    |
| health         | Combined   | 58.308   | 20.948 | 52.476          | 64.140 | 64.129            | 16.637 | 58.027          | 70.232 | -.524       | .600    |
|                | Total      | 59.362   | 19.911 | 56.011          | 62.714 | 66.389            | 17.897 | 62.183          | 70.594 | -2.665      | .008**  |
| SF-36          | Psychology | 55.554   | 46.368 | 41.105          | 70.004 | 76.191            | 33.150 | 57.051          | 95.331 | -.842       | .400    |

|                 |            |        |         |        |        |        |        |        |        |        |         |
|-----------------|------------|--------|---------|--------|--------|--------|--------|--------|--------|--------|---------|
| Role            | Nutrition  | 48.482 | 47.390  | 34.074 | 62.890 | 55.594 | 38.130 | 40.510 | 70.678 | -1.788 | .074    |
| limitations     | Combined   | 47.780 | 43.924  | 35.551 | 60.008 | 67.742 | 32.756 | 55.727 | 79.757 | -2.313 | .021*   |
| emotional       | Total      | 50.370 | 45.590  | 42.695 | 58.044 | 64.829 | 35.335 | 56.526 | 73.133 | -3.159 | .002**  |
| SF-36           | Psychology | 20.714 | 16.139  | 15.685 | 25.743 | 41.071 | 20.586 | 29.186 | 52.957 | -3.066 | .002**  |
| Vitality Energy | Nutrition  | 20.114 | 14.5670 | 15.685 | 24.542 | 31.111 | 23.588 | 21.780 | 40.442 | -2.734 | .006**  |
| or Fatigue      | Combined   | 19.039 | 17.658  | 14.123 | 23.955 | 27.097 | 19.527 | 19.934 | 34.259 | -1.558 | .119    |
|                 | Total      | 19.891 | 16.159  | 17.171 | 22.611 | 31.319 | 21.657 | 26.230 | 36.409 | -4.205 | .001*** |
| SF-36           | Psychology | 37.024 | 17.945  | 31.432 | 42.616 | 45.714 | 21.109 | 33.526 | 57.903 | -2.561 | .010*   |
| General health  | Nutrition  | 28.636 | 15.528  | 23.915 | 33.357 | 36.482 | 18.903 | 29.004 | 43.959 | -2.157 | .031*   |
| perceptions     | Combined   | 30.962 | 17.575  | 26.069 | 35.854 | 42.097 | 21.632 | 34.162 | 50.032 | -2.423 | .015*   |
|                 | Total      | 32.065 | 17.286  | 29.156 | 34.975 | 40.694 | 20.561 | 35.863 | 45.526 | -3.996 | .001*** |
| MFI             | Psychology | 15.952 | 2.845   | 15.066 | 16.839 | 13.786 | 4.441  | 11.222 | 16.350 | -2.657 | .008**  |
| General         | Nutrition  | 16.977 | 2.601   | 16.186 | 17.768 | 14.704 | 4.898  | 12.766 | 16.641 | -2.548 | .011*   |
| Fatigue         | Combined   | 17.327 | 2.588   | 16.607 | 18.047 | 16.645 | 2.811  | 15.614 | 17.676 | -.854  | .393    |
|                 | Total      | 16.797 | 2.716   | 16.340 | 17.254 | 15.361 | 4.136  | 14.389 | 16.333 | -3.692 | .001*** |
| MFI             | Psychology | 15.929 | 3.331   | 14.891 | 16.966 | 13.071 | 4.632  | 10.397 | 15.746 | -2.810 | .005**  |
| Physical        | Nutrition  | 16.727 | 3.358   | 15.707 | 17.748 | 14.222 | 4.987  | 12.249 | 16.195 | -2.791 | .005**  |
| Fatigue         | Combined   | 17.615 | 2.823   | 16.830 | 18.401 | 16.484 | 3.395  | 15.239 | 17.729 | -2.364 | .018*   |
|                 | Total      | 16.819 | 3.211   | 16.278 | 17.359 | 14.972 | 4.453  | 13.926 | 16.019 | -4.591 | .001*** |
| MFI             | Psychology | 13.857 | 4.112   | 12.576 | 15.138 | 10.643 | 5.153  | 7.668  | 13.618 | -2.142 | .032*   |
| Reduced         | Nutrition  | 14.136 | 4.027   | 12.912 | 15.361 | 12.259 | 5.012  | 10.277 | 14.242 | -2.164 | .030*   |
| Activity        | Combined   | 14.962 | 3.662   | 13.942 | 15.981 | 14.936 | 3.777  | 13.550 | 16.321 | -.070  | .944    |
|                 | Total      | 14.362 | 3.921   | 13.702 | 15.022 | 13.097 | 4.798  | 11.970 | 14.225 | -2.421 | .015*   |
| MFI             | Psychology | 10.357 | 4.287   | 9.021  | 11.693 | 7.286  | 4.214  | 4.853  | 9.719  | -2.131 | .033*   |
| Reduced         | Nutrition  | 10.500 | 3.474   | 9.444  | 11.556 | 8.963  | 3.736  | 7.485  | 10.441 | -1.985 | .047*   |

1  
2  
3  
4  
5  
6  
7  
8  
9  
10  
11  
12  
13  
14  
15  
16  
17  
18  
19  
20  
21  
22  
23  
24  
25  
26  
27  
28  
29  
30  
31  
32  
33  
34  
35  
36  
37  
38  
39  
40  
41  
42  
43  
44  
45  
46  
47  
48  
49

|                       |                   |               |              |               |               |               |              |               |               |               |                |
|-----------------------|-------------------|---------------|--------------|---------------|---------------|---------------|--------------|---------------|---------------|---------------|----------------|
| <u>Motivation</u>     | <u>Combined</u>   | <u>11.462</u> | <u>3.153</u> | <u>10.584</u> | <u>12.339</u> | <u>10.774</u> | <u>3.095</u> | <u>9.639</u>  | <u>11.910</u> | <u>-1.082</u> | <u>.279</u>    |
|                       | <u>Total</u>      | <u>10.819</u> | <u>3.639</u> | <u>10.206</u> | <u>11.431</u> | <u>9.417</u>  | <u>3.767</u> | <u>8.532</u>  | <u>10.302</u> | <u>-2.986</u> | <u>.003**</u>  |
| <u>MFI</u>            | <u>Psychology</u> | <u>13.524</u> | <u>4.363</u> | <u>12.164</u> | <u>14.883</u> | <u>10.500</u> | <u>4.468</u> | <u>7.920</u>  | <u>13.080</u> | <u>-2.950</u> | <u>.003*</u>   |
| <u>Mental Fatigue</u> | <u>Nutrition</u>  | <u>13.682</u> | <u>4.328</u> | <u>12.366</u> | <u>14.998</u> | <u>11.926</u> | <u>5.334</u> | <u>9.816</u>  | <u>14.036</u> | <u>-2.082</u> | <u>.037*</u>   |
|                       | <u>Combined</u>   | <u>13.846</u> | <u>4.345</u> | <u>12.637</u> | <u>15.056</u> | <u>12.613</u> | <u>3.827</u> | <u>11.209</u> | <u>14.017</u> | <u>-1.586</u> | <u>.113</u>    |
|                       | <u>Total</u>      | <u>13.696</u> | <u>4.315</u> | <u>12.969</u> | <u>14.422</u> | <u>11.944</u> | <u>4.568</u> | <u>10.871</u> | <u>13.018</u> | <u>-3.661</u> | <u>.001***</u> |

<sup>a</sup>z-statistic for Wilcoxon Signed-Rank Test

**Table 3. Comparisons across time within the secondary outcome measures (ME/CFS-specific)**

|                    |                   | <u>Baseline</u> |              |                        |              | <u>3-month follow-up</u> |              |                        |              | <u>Comparisons</u> |                |
|--------------------|-------------------|-----------------|--------------|------------------------|--------------|--------------------------|--------------|------------------------|--------------|--------------------|----------------|
|                    |                   | <u>Mean</u>     | <u>SD</u>    | <u>95% CI for Mean</u> |              | <u>Mean</u>              | <u>SD</u>    | <u>95% CI for Mean</u> |              | <u>z-statistic</u> | <u>p-value</u> |
|                    |                   |                 |              | <u>Lower</u>           | <u>Upper</u> |                          |              | <u>Lower</u>           | <u>Upper</u> |                    |                |
| <u>CDC CFS</u>     | <u>Psychology</u> | <u>2.571</u>    | <u>3.109</u> | <u>1.603</u>           | <u>3.540</u> | <u>1.429</u>             | <u>2.278</u> | <u>.114</u>            | <u>2.744</u> | <u>-1.365</u>      | <u>.172</u>    |
| <u>Sore Throat</u> | <u>Nutrition</u>  | <u>3.977</u>    | <u>3.776</u> | <u>2.829</u>           | <u>5.125</u> | <u>1.741</u>             | <u>2.087</u> | <u>.915</u>            | <u>2.566</u> | <u>-2.211</u>      | <u>.027*</u>   |
|                    | <u>Combined</u>   | <u>3.202</u>    | <u>4.494</u> | <u>1.951</u>           | <u>4.454</u> | <u>1.904</u>             | <u>2.821</u> | <u>.870</u>            | <u>2.939</u> | <u>-.804</u>       | <u>.422</u>    |
|                    | <u>Total</u>      | <u>3.257</u>    | <u>3.898</u> | <u>2.601</u>           | <u>3.914</u> | <u>1.750</u>             | <u>2.437</u> | <u>1.178</u>           | <u>2.323</u> | <u>-2.387</u>      | <u>.017*</u>   |
| <u>CDC CFS</u>     | <u>Psychology</u> | <u>1.976</u>    | <u>3.382</u> | <u>.922</u>            | <u>3.030</u> | <u>1.786</u>             | <u>3.378</u> | <u>-.165</u>           | <u>3.736</u> | <u>-.341</u>       | <u>.733</u>    |
| <u>Swollen</u>     | <u>Nutrition</u>  | <u>5.561</u>    | <u>6.491</u> | <u>3.587</u>           | <u>7.534</u> | <u>5.000</u>             | <u>6.760</u> | <u>2.326</u>           | <u>7.674</u> | <u>-2.212</u>      | <u>.027*</u>   |
| <u>Lymph nodes</u> | <u>Combined</u>   | <u>3.462</u>    | <u>4.881</u> | <u>2.103</u>           | <u>4.820</u> | <u>2.690</u>             | <u>4.477</u> | <u>1.0458</u>          | <u>4.332</u> | <u>-.725</u>       | <u>.468</u>    |
| <u>Glands</u>      | <u>Total</u>      | <u>3.679</u>    | <u>5.250</u> | <u>2.795</u>           | <u>4.563</u> | <u>3.380</u>             | <u>5.385</u> | <u>2.115</u>           | <u>4.646</u> | <u>-1.684</u>      | <u>.092</u>    |
| <u>CDC CFS</u>     | <u>Psychology</u> | <u>2.071</u>    | <u>3.249</u> | <u>1.059</u>           | <u>3.084</u> | <u>1.643</u>             | <u>2.818</u> | <u>.016</u>            | <u>3.270</u> | <u>-.730</u>       | <u>.465</u>    |

|                                              |                            |                        |                       |                        |                        |                        |                       |                       |                        |                        |                         |
|----------------------------------------------|----------------------------|------------------------|-----------------------|------------------------|------------------------|------------------------|-----------------------|-----------------------|------------------------|------------------------|-------------------------|
| <a href="#">Diarrhea</a>                     | <a href="#">Nutrition</a>  | <a href="#">2.841</a>  | <a href="#">4.832</a> | <a href="#">1.372</a>  | <a href="#">4.310</a>  | <a href="#">1.444</a>  | <a href="#">3.274</a> | <a href="#">.149</a>  | <a href="#">2.740</a>  | <a href="#">-1.649</a> | <a href="#">.099</a>    |
|                                              | <a href="#">Combined</a>   | <a href="#">3.135</a>  | <a href="#">3.773</a> | <a href="#">2.084</a>  | <a href="#">4.185</a>  | <a href="#">1.631</a>  | <a href="#">2.483</a> | <a href="#">.720</a>  | <a href="#">2.542</a>  | <a href="#">-1.996</a> | <a href="#">.046*</a>   |
|                                              | <a href="#">Total</a>      | <a href="#">2.717</a>  | <a href="#">3.998</a> | <a href="#">2.044</a>  | <a href="#">3.390</a>  | <a href="#">1.563</a>  | <a href="#">2.827</a> | <a href="#">.899</a>  | <a href="#">2.228</a>  | <a href="#">-2.481</a> | <a href="#">.013*</a>   |
| <a href="#">CDC CFS</a>                      | <a href="#">Psychology</a> | <a href="#">13.286</a> | <a href="#">6.271</a> | <a href="#">11.331</a> | <a href="#">15.240</a> | <a href="#">11.071</a> | <a href="#">6.673</a> | <a href="#">7.218</a> | <a href="#">14.925</a> | <a href="#">-1.550</a> | <a href="#">.121</a>    |
| <a href="#">Fatigue after exertion</a>       | <a href="#">Nutrition</a>  | <a href="#">13.722</a> | <a href="#">6.450</a> | <a href="#">11.761</a> | <a href="#">15.682</a> | <a href="#">11.815</a> | <a href="#">7.217</a> | <a href="#">8.960</a> | <a href="#">14.670</a> | <a href="#">-2.209</a> | <a href="#">.027*</a>   |
|                                              | <a href="#">Combined</a>   | <a href="#">14.154</a> | <a href="#">6.270</a> | <a href="#">12.408</a> | <a href="#">15.899</a> | <a href="#">11.436</a> | <a href="#">6.275</a> | <a href="#">9.134</a> | <a href="#">13.738</a> | <a href="#">-2.392</a> | <a href="#">.017*</a>   |
|                                              | <a href="#">Total</a>      | <a href="#">13.752</a> | <a href="#">6.292</a> | <a href="#">12.693</a> | <a href="#">14.811</a> | <a href="#">11.507</a> | <a href="#">6.629</a> | <a href="#">9.949</a> | <a href="#">13.065</a> | <a href="#">-3.574</a> | <a href="#">.001***</a> |
| <a href="#">CDC CFS</a>                      | <a href="#">Psychology</a> | <a href="#">8.286</a>  | <a href="#">6.747</a> | <a href="#">6.183</a>  | <a href="#">10.388</a> | <a href="#">7.429</a>  | <a href="#">6.892</a> | <a href="#">3.450</a> | <a href="#">11.408</a> | <a href="#">-2.145</a> | <a href="#">.032*</a>   |
| <a href="#">Muscle Aches or Muscle Pains</a> | <a href="#">Nutrition</a>  | <a href="#">9.091</a>  | <a href="#">6.383</a> | <a href="#">7.151</a>  | <a href="#">11.031</a> | <a href="#">7.222</a>  | <a href="#">6.278</a> | <a href="#">4.739</a> | <a href="#">9.706</a>  | <a href="#">-2.901</a> | <a href="#">.004**</a>  |
|                                              | <a href="#">Combined</a>   | <a href="#">8.519</a>  | <a href="#">6.932</a> | <a href="#">6.589</a>  | <a href="#">10.449</a> | <a href="#">6.188</a>  | <a href="#">5.528</a> | <a href="#">4.160</a> | <a href="#">8.215</a>  | <a href="#">-1.908</a> | <a href="#">.056</a>    |
|                                              | <a href="#">Total</a>      | <a href="#">8.630</a>  | <a href="#">6.664</a> | <a href="#">7.509</a>  | <a href="#">9.752</a>  | <a href="#">6.817</a>  | <a href="#">6.029</a> | <a href="#">5.400</a> | <a href="#">8.234</a>  | <a href="#">-3.995</a> | <a href="#">.001***</a> |
| <a href="#">CDC CFS</a>                      | <a href="#">Psychology</a> | <a href="#">3.476</a>  | <a href="#">5.334</a> | <a href="#">1.814</a>  | <a href="#">5.138</a>  | <a href="#">2.786</a>  | <a href="#">4.458</a> | <a href="#">.212</a>  | <a href="#">5.360</a>  | <a href="#">-1.778</a> | <a href="#">.075</a>    |
| <a href="#">Pain In Joints</a>               | <a href="#">Nutrition</a>  | <a href="#">4.696</a>  | <a href="#">5.560</a> | <a href="#">3.006</a>  | <a href="#">6.386</a>  | <a href="#">3.926</a>  | <a href="#">5.099</a> | <a href="#">1.909</a> | <a href="#">5.943</a>  | <a href="#">-2.022</a> | <a href="#">.043*</a>   |
|                                              | <a href="#">Combined</a>   | <a href="#">5.474</a>  | <a href="#">6.386</a> | <a href="#">3.696</a>  | <a href="#">7.251</a>  | <a href="#">3.010</a>  | <a href="#">4.140</a> | <a href="#">1.492</a> | <a href="#">4.528</a>  | <a href="#">-1.840</a> | <a href="#">.066</a>    |
|                                              | <a href="#">Total</a>      | <a href="#">4.618</a>  | <a href="#">5.837</a> | <a href="#">3.635</a>  | <a href="#">5.600</a>  | <a href="#">3.310</a>  | <a href="#">4.543</a> | <a href="#">2.242</a> | <a href="#">4.377</a>  | <a href="#">-3.141</a> | <a href="#">.002**</a>  |
| <a href="#">CDC CFS</a>                      | <a href="#">Psychology</a> | <a href="#">1.238</a>  | <a href="#">2.516</a> | <a href="#">.454</a>   | <a href="#">2.022</a>  | <a href="#">1.643</a>  | <a href="#">4.181</a> | <a href="#">-.771</a> | <a href="#">4.057</a>  | <a href="#">-.135</a>  | <a href="#">.892</a>    |
| <a href="#">Fever</a>                        | <a href="#">Nutrition</a>  | <a href="#">1.394</a>  | <a href="#">2.562</a> | <a href="#">.615</a>   | <a href="#">2.173</a>  | <a href="#">.630</a>   | <a href="#">2.041</a> | <a href="#">-.178</a> | <a href="#">1.437</a>  | <a href="#">-1.487</a> | <a href="#">.137</a>    |
|                                              | <a href="#">Combined</a>   | <a href="#">1.333</a>  | <a href="#">3.909</a> | <a href="#">.245</a>   | <a href="#">2.421</a>  | <a href="#">.378</a>   | <a href="#">.709</a>  | <a href="#">.118</a>  | <a href="#">.638</a>   | <a href="#">-1.517</a> | <a href="#">.129</a>    |
|                                              | <a href="#">Total</a>      | <a href="#">1.324</a>  | <a href="#">3.106</a> | <a href="#">.801</a>   | <a href="#">1.846</a>  | <a href="#">.718</a>   | <a href="#">2.272</a> | <a href="#">.185</a>  | <a href="#">1.252</a>  | <a href="#">-1.876</a> | <a href="#">.061</a>    |
| <a href="#">CDC CFS</a>                      | <a href="#">Psychology</a> | <a href="#">3.357</a>  | <a href="#">4.637</a> | <a href="#">1.912</a>  | <a href="#">4.802</a>  | <a href="#">2.571</a>  | <a href="#">4.398</a> | <a href="#">.032</a>  | <a href="#">5.111</a>  | <a href="#">-1.970</a> | <a href="#">.049*</a>   |
| <a href="#">Chills</a>                       | <a href="#">Nutrition</a>  | <a href="#">3.750</a>  | <a href="#">3.924</a> | <a href="#">2.557</a>  | <a href="#">4.943</a>  | <a href="#">2.222</a>  | <a href="#">4.098</a> | <a href="#">.601</a>  | <a href="#">3.843</a>  | <a href="#">-3.401</a> | <a href="#">.001***</a> |
|                                              | <a href="#">Combined</a>   | <a href="#">3.192</a>  | <a href="#">4.343</a> | <a href="#">1.983</a>  | <a href="#">4.402</a>  | <a href="#">1.908</a>  | <a href="#">2.797</a> | <a href="#">.882</a>  | <a href="#">2.934</a>  | <a href="#">-2.049</a> | <a href="#">.040*</a>   |
|                                              | <a href="#">Total</a>      | <a href="#">3.420</a>  | <a href="#">4.283</a> | <a href="#">2.699</a>  | <a href="#">4.141</a>  | <a href="#">2.155</a>  | <a href="#">3.614</a> | <a href="#">1.306</a> | <a href="#">3.004</a>  | <a href="#">-4.206</a> | <a href="#">.001***</a> |
| <a href="#">CDC CFS</a>                      | <a href="#">Psychology</a> | <a href="#">12.905</a> | <a href="#">6.792</a> | <a href="#">10.788</a> | <a href="#">15.021</a> | <a href="#">10.643</a> | <a href="#">6.698</a> | <a href="#">6.776</a> | <a href="#">14.510</a> | <a href="#">-.802</a>  | <a href="#">.422</a>    |
| <a href="#">UnrefreshingSl</a>               | <a href="#">Nutrition</a>  | <a href="#">12.250</a> | <a href="#">7.088</a> | <a href="#">10.095</a> | <a href="#">14.405</a> | <a href="#">9.444</a>  | <a href="#">7.738</a> | <a href="#">6.384</a> | <a href="#">12.505</a> | <a href="#">-1.421</a> | <a href="#">.155</a>    |

1  
2  
3  
4  
5  
6  
7  
8  
9  
10  
11  
12  
13  
14  
15  
16  
17  
18  
19  
20  
21  
22  
23  
24  
25  
26  
27  
28  
29  
30  
31  
32  
33  
34  
35  
36  
37  
38  
39  
40  
41  
42  
43  
44  
45  
46  
47  
48  
49

|                      |                   |               |              |               |               |               |              |              |               |               |                |
|----------------------|-------------------|---------------|--------------|---------------|---------------|---------------|--------------|--------------|---------------|---------------|----------------|
| <u>cep</u>           | <u>Combined</u>   | <u>12.154</u> | <u>7.147</u> | <u>10.164</u> | <u>14.143</u> | <u>10.161</u> | <u>7.959</u> | <u>7.242</u> | <u>13.080</u> | <u>-1.513</u> | <u>.130</u>    |
|                      | <u>Total</u>      | <u>12.413</u> | <u>6.978</u> | <u>11.238</u> | <u>13.588</u> | <u>9.986</u>  | <u>7.557</u> | <u>8.210</u> | <u>11.762</u> | <u>-2.295</u> | <u>.022*</u>   |
| <u>CDC CFS</u>       | <u>Psychology</u> | <u>9.286</u>  | <u>7.658</u> | <u>6.899</u>  | <u>11.672</u> | <u>5.286</u>  | <u>4.921</u> | <u>2.444</u> | <u>8.127</u>  | <u>-1.738</u> | <u>.082</u>    |
| <u>Sleeping</u>      | <u>Nutrition</u>  | <u>8.614</u>  | <u>7.317</u> | <u>6.389</u>  | <u>10.838</u> | <u>9.482</u>  | <u>9.200</u> | <u>5.842</u> | <u>13.121</u> | <u>-.190</u>  | <u>.849</u>    |
| <u>Problems</u>      | <u>Combined</u>   | <u>8.904</u>  | <u>7.681</u> | <u>6.766</u>  | <u>11.042</u> | <u>6.529</u>  | <u>6.749</u> | <u>4.053</u> | <u>9.004</u>  | <u>-1.794</u> | <u>.073</u>    |
|                      | <u>Total</u>      | <u>8.928</u>  | <u>7.509</u> | <u>7.664</u>  | <u>10.192</u> | <u>7.394</u>  | <u>7.585</u> | <u>5.612</u> | <u>9.177</u>  | <u>-1.983</u> | <u>.047*</u>   |
| <u>CDC CFS</u>       | <u>Psychology</u> | <u>5.262</u>  | <u>5.548</u> | <u>3.533</u>  | <u>6.991</u>  | <u>4.357</u>  | <u>3.411</u> | <u>2.388</u> | <u>6.326</u>  | <u>-1.200</u> | <u>.230</u>    |
| <u>Headaches</u>     | <u>Nutrition</u>  | <u>7.646</u>  | <u>7.040</u> | <u>5.506</u>  | <u>9.786</u>  | <u>5.185</u>  | <u>6.294</u> | <u>2.695</u> | <u>7.675</u>  | <u>-2.084</u> | <u>.037*</u>   |
|                      | <u>Combined</u>   | <u>6.346</u>  | <u>5.857</u> | <u>4.715</u>  | <u>7.977</u>  | <u>4.050</u>  | <u>3.527</u> | <u>2.756</u> | <u>5.343</u>  | <u>-2.807</u> | <u>.005**</u>  |
|                      | <u>Total</u>      | <u>6.431</u>  | <u>6.200</u> | <u>5.387</u>  | <u>7.474</u>  | <u>4.535</u>  | <u>4.708</u> | <u>3.429</u> | <u>5.642</u>  | <u>-3.000</u> | <u>.003**</u>  |
| <u>CDC CFS</u>       | <u>Psychology</u> | <u>6.333</u>  | <u>4.996</u> | <u>4.777</u>  | <u>7.890</u>  | <u>3.500</u>  | <u>3.995</u> | <u>1.193</u> | <u>5.807</u>  | <u>-1.965</u> | <u>.049*</u>   |
| <u>Memory</u>        | <u>Nutrition</u>  | <u>9.409</u>  | <u>7.183</u> | <u>7.225</u>  | <u>11.593</u> | <u>8.667</u>  | <u>7.681</u> | <u>5.628</u> | <u>11.705</u> | <u>-.338</u>  | <u>.735</u>    |
| <u>Problems</u>      | <u>Combined</u>   | <u>8.173</u>  | <u>7.610</u> | <u>6.055</u>  | <u>10.292</u> | <u>6.148</u>  | <u>4.905</u> | <u>4.349</u> | <u>7.947</u>  | <u>-1.446</u> | <u>.148</u>    |
|                      | <u>Total</u>      | <u>8.007</u>  | <u>6.835</u> | <u>6.857</u>  | <u>9.158</u>  | <u>6.578</u>  | <u>6.189</u> | <u>5.123</u> | <u>8.032</u>  | <u>-2.053</u> | <u>.040*</u>   |
| <u>CDC CFS</u>       | <u>Psychology</u> | <u>8.500</u>  | <u>6.094</u> | <u>6.601</u>  | <u>10.399</u> | <u>5.143</u>  | <u>5.559</u> | <u>1.933</u> | <u>8.353</u>  | <u>-2.809</u> | <u>.005**</u>  |
| <u>Difficulty</u>    | <u>Nutrition</u>  | <u>9.822</u>  | <u>7.641</u> | <u>7.499</u>  | <u>12.145</u> | <u>7.778</u>  | <u>6.941</u> | <u>5.032</u> | <u>10.524</u> | <u>-1.196</u> | <u>.232</u>    |
| <u>Concentrating</u> | <u>Combined</u>   | <u>9.135</u>  | <u>6.942</u> | <u>7.202</u>  | <u>11.067</u> | <u>6.507</u>  | <u>4.843</u> | <u>4.731</u> | <u>8.283</u>  | <u>-1.899</u> | <u>.058</u>    |
|                      | <u>Total</u>      | <u>9.161</u>  | <u>6.903</u> | <u>7.999</u>  | <u>10.323</u> | <u>6.718</u>  | <u>5.844</u> | <u>5.345</u> | <u>8.092</u>  | <u>-3.440</u> | <u>.001***</u> |
| <u>CDC CFS</u>       | <u>Psychology</u> | <u>3.476</u>  | <u>4.845</u> | <u>1.966</u>  | <u>4.986</u>  | <u>2.286</u>  | <u>2.946</u> | <u>.585</u>  | <u>3.987</u>  | <u>-.213</u>  | <u>.832</u>    |
| <u>Nausea</u>        | <u>Nutrition</u>  | <u>4.769</u>  | <u>5.135</u> | <u>3.208</u>  | <u>6.330</u>  | <u>3.407</u>  | <u>5.746</u> | <u>1.134</u> | <u>5.681</u>  | <u>-1.686</u> | <u>.092</u>    |
|                      | <u>Combined</u>   | <u>3.327</u>  | <u>4.902</u> | <u>1.962</u>  | <u>4.692</u>  | <u>3.458</u>  | <u>3.585</u> | <u>2.144</u> | <u>4.773</u>  | <u>-.855</u>  | <u>.392</u>    |
|                      | <u>Total</u>      | <u>3.832</u>  | <u>4.966</u> | <u>2.996</u>  | <u>4.668</u>  | <u>3.211</u>  | <u>4.396</u> | <u>2.178</u> | <u>4.244</u>  | <u>-.584</u>  | <u>.559</u>    |
| <u>CDC CFS</u>       | <u>Psychology</u> | <u>2.548</u>  | <u>3.270</u> | <u>1.529</u>  | <u>3.567</u>  | <u>2.786</u>  | <u>4.003</u> | <u>.474</u>  | <u>5.097</u>  | <u>-.343</u>  | <u>.732</u>    |
| <u>Abdominal</u>     | <u>Nutrition</u>  | <u>5.064</u>  | <u>5.165</u> | <u>3.493</u>  | <u>6.634</u>  | <u>3.593</u>  | <u>3.905</u> | <u>2.048</u> | <u>5.137</u>  | <u>-1.968</u> | <u>.049*</u>   |
| <u>Pain</u>          | <u>Combined</u>   | <u>3.750</u>  | <u>4.635</u> | <u>2.460</u>  | <u>5.041</u>  | <u>2.548</u>  | <u>2.791</u> | <u>1.524</u> | <u>3.572</u>  | <u>-.598</u>  | <u>.550</u>    |

1  
2  
3  
4  
5  
6  
7  
8  
9  
10  
11  
12  
13  
14  
15  
16  
17  
18  
19  
20  
21  
22  
23  
24  
25  
26  
27  
28  
29  
30  
31  
32  
33  
34  
35  
36  
37  
38  
39  
40  
41  
42  
43  
44  
45  
46  
47  
48  
49

|                |              |              |              |              |              |              |              |              |              |               |               |
|----------------|--------------|--------------|--------------|--------------|--------------|--------------|--------------|--------------|--------------|---------------|---------------|
|                | <u>Total</u> | <u>3.803</u> | <u>4.535</u> | <u>3.040</u> | <u>4.566</u> | <u>2.986</u> | <u>3.470</u> | <u>2.171</u> | <u>3.801</u> | <u>-1.727</u> | <u>.084</u>   |
| CDC CFS        | Psychology   | 3.524        | 4.702        | 2.059        | 4.989        | 2.357        | 2.437        | .950         | 3.764        | -.724         | .469          |
| Sinus Nasal    | Nutrition    | 5.469        | 6.476        | 3.500        | 7.438        | 4.889        | 6.104        | 2.474        | 7.304        | -1.400        | .162          |
| Symptoms       | Combined     | 4.789        | 6.304        | 3.034        | 6.544        | 3.804        | 6.710        | 1.343        | 6.266        | -2.482        | .013*         |
|                | <u>Total</u> | <u>4.620</u> | <u>5.931</u> | <u>3.622</u> | <u>5.619</u> | <u>3.930</u> | <u>5.882</u> | <u>2.547</u> | <u>5.312</u> | <u>-2.971</u> | <u>.003**</u> |
| CDC CFS        | Psychology   | 3.000        | 4.191        | 1.694        | 4.306        | 1.571        | 2.209        | .296         | 2.847        | -1.556        | .120          |
| Shortness Of   | Nutrition    | 3.285        | 4.090        | 2.026        | 4.543        | 2.407        | 4.060        | .801         | 4.013        | -1.849        | .064          |
| Breath         | Combined     | 3.392        | 4.788        | 2.046        | 4.739        | 2.526        | 3.631        | 1.194        | 3.858        | -.976         | .329          |
|                | <u>Total</u> | <u>3.237</u> | <u>4.365</u> | <u>2.497</u> | <u>3.977</u> | <u>2.296</u> | <u>3.554</u> | <u>1.461</u> | <u>3.131</u> | <u>-2.538</u> | <u>.011*</u>  |
| CDC CFS        | Psychology   | 3.429        | 5.347        | 1.762        | 5.095        | 1.214        | 2.517        | -.239        | 2.668        | -1.973        | .049*         |
| Sensitivity To | Nutrition    | 5.031        | 6.097        | 3.177        | 6.884        | 4.111        | 6.198        | 1.659        | 6.563        | -2.136        | .033*         |
| Light          | Combined     | 4.481        | 6.360        | 2.710        | 6.251        | 3.297        | 5.557        | 1.259        | 5.335        | -.787         | .431          |
|                | <u>Total</u> | <u>4.336</u> | <u>5.975</u> | <u>3.330</u> | <u>5.342</u> | <u>3.197</u> | <u>5.419</u> | <u>1.924</u> | <u>4.471</u> | <u>-2.542</u> | <u>.011*</u>  |
| CDC CFS        | Psychology   | 3.952        | 3.938        | 2.725        | 5.180        | 1.571        | 3.228        | -.292        | 3.435        | -1.614        | .106          |
| Depression     | Nutrition    | 4.477        | 5.450        | 2.821        | 6.134        | 3.333        | 4.883        | 1.402        | 5.265        | -1.584        | .113          |
|                | Combined     | 5.077        | 5.950        | 3.420        | 6.734        | 2.766        | 3.324        | 1.547        | 3.985        | -1.304        | .192          |
|                | <u>Total</u> | <u>4.544</u> | <u>5.230</u> | <u>3.663</u> | <u>5.424</u> | <u>2.747</u> | <u>3.964</u> | <u>1.815</u> | <u>3.678</u> | <u>-2.297</u> | <u>.022*</u>  |

<sup>a</sup>z-statistic for Wilcoxon Signed-Rank Test

**Table 4. Comparisons across time within the secondary outcome measures (psychological)**

|  | <u>Baseline</u> |           |                        |              | <u>3-month follow-up</u> |           |                        |              | <u>Comparisons</u> |                |
|--|-----------------|-----------|------------------------|--------------|--------------------------|-----------|------------------------|--------------|--------------------|----------------|
|  | <u>Mean</u>     | <u>SD</u> | <u>95% CI for Mean</u> |              | <u>Mean</u>              | <u>SD</u> | <u>95% CI for Mean</u> |              | <u>z-statistic</u> | <u>p-value</u> |
|  |                 |           | <u>Lower</u>           | <u>Upper</u> |                          |           | <u>Lower</u>           | <u>Upper</u> |                    |                |
|  |                 |           |                        |              |                          |           |                        |              |                    |                |



|              |            |        |        |        |         |        |        |        |        |        |         |
|--------------|------------|--------|--------|--------|---------|--------|--------|--------|--------|--------|---------|
| MHLCS        | Psychology | .677   | .159   | .627   | .726    | .821   | .251   | .676   | .966   | -2.983 | .003**  |
| Internal     | Nutrition  | .622   | .177   | .568   | .675    | 1.193  | 2.969  | .019   | 2.368  | -.687  | .492    |
|              | Combined   | .662   | .174   | .613   | .710    | .779   | .318   | .662   | .896   | -1.755 | .079    |
|              | Total      | .653   | .171   | .624   | .682    | .942   | 1.822  | .514   | 1.371  | -2.962 | .003**  |
| MHLCS        | Psychology | .368   | .156   | .320   | .417    | .351   | .152   | .263   | .439   | -2.594 | .009**  |
| Chance       | Nutrition  | .340   | .133   | .299   | .380    | .911   | 3.020  | -.284  | 2.105  | -.143  | .886    |
|              | Combined   | .354   | .155   | .311   | .397    | .314   | .133   | .265   | .363   | -.672  | .501    |
|              | Total      | .354   | .148   | .329   | .379    | .545   | 1.853  | .109   | .980   | -1.552 | .121    |
| MHLCS        | Psychology | .404   | .134   | .362   | .446    | .441   | .315   | .259   | .624   | .000   | 1.000   |
| Powerful     | Nutrition  | .418   | .141   | .374   | .460    | .804   | 2.244  | -.084  | 1.691  | -1.843 | .065    |
| Others       | Combined   | .407   | .101   | .379   | .436    | .434   | .279   | .331   | .536   | -.577  | .564    |
|              | Total      | .409   | .124   | .388   | .430    | .574   | 1.3880 | .248   | .900   | -1.601 | .109    |
| MHLCS        | Psychology | .169   | .082   | .143   | .194    | .131   | .093   | .077   | .185   | -1.122 | .262    |
| Doctors      | Nutrition  | .171   | .089   | .144   | .197    | .657   | 2.668  | -.398  | 1.713  | -1.686 | .092    |
|              | Combined   | .191   | .147   | .150   | .232    | .153   | .070   | .128   | .179   | -1.384 | .166    |
|              | Total      | .178   | .112   | .159   | .196    | .338   | 1.635  | -.0462 | .722   | -2.381 | .017*   |
| MHLCS        | Psychology | .235   | .075   | .212   | .259    | .268   | .189   | .159   | .377   | -.118  | .906    |
| Other People | Nutrition  | .264   | .129   | .225   | .304    | .739   | 2.652  | -.311  | 1.788  | -1.697 | .090    |
|              | Combined   | .245   | .074   | .224   | .265    | .252   | .118   | .209   | .295   | -.213  | .831    |
|              | Total      | .248   | .095   | .232   | .264    | .438   | 1.626  | .055   | .820   | -1.186 | .236    |
| CDC CFS      | Psychology | 94.381 | 16.836 | 89.134 | 99.628  | 78.571 | 18.434 | 67.928 | 89.215 | -3.111 | .002**  |
| Maladaptive  | Nutrition  | 96.386 | 21.946 | 89.714 | 103.059 | 85.259 | 27.665 | 74.315 | 96.203 | -3.443 | .001*** |
| Stress Index | Combined   | 98.269 | 19.165 | 92.934 | 103.605 | 87.484 | 22.965 | 79.060 | 95.908 | -2.215 | .027*   |
| Scale Score  | Total      | 96.486 | 19.373 | 93.225 | 99.747  | 84.917 | 24.004 | 79.276 | 90.557 | -5.123 | .001*** |

<sup>a</sup>z-statistic for Wilcoxon Signed-Rank Test

1  
2  
3  
4  
5  
6  
7  
8  
9  
10  
11  
12  
13  
14  
15  
16  
17  
18  
19  
20  
21  
22  
23  
24  
25  
26  
27  
28  
29  
30  
31  
32  
33  
34  
35  
36  
37  
38  
39  
40  
41  
42  
43  
44  
45  
46  
47  
48  
49



For peer review only

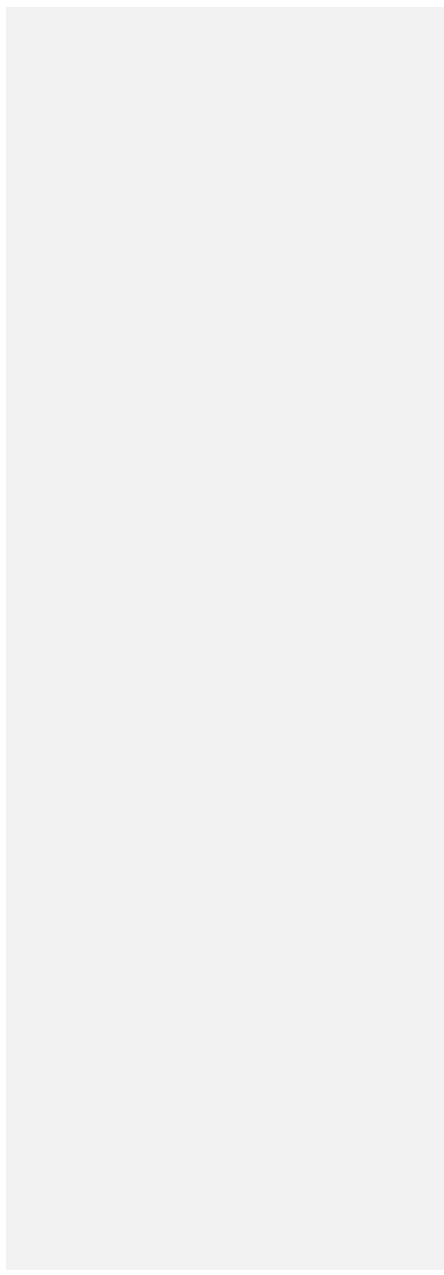

**STROBE 2007 (v4) checklist of items to be included in reports of observational studies in epidemiology\***  
**Checklist for cohort, case-control, and cross-sectional studies (combined)**

| Section/Topic             | Item # | Recommendation                                                                                                                                                                                                                                                                                                                                                                                                                                                         | Reported on page # |
|---------------------------|--------|------------------------------------------------------------------------------------------------------------------------------------------------------------------------------------------------------------------------------------------------------------------------------------------------------------------------------------------------------------------------------------------------------------------------------------------------------------------------|--------------------|
| Title and abstract        | 1      | (a) Indicate the study's design with a commonly used term in the title or the abstract                                                                                                                                                                                                                                                                                                                                                                                 | Title and Abstract |
|                           |        | (b) Provide in the abstract an informative and balanced summary of what was done and what was found                                                                                                                                                                                                                                                                                                                                                                    | Title and Abstract |
| <b>Introduction</b>       |        |                                                                                                                                                                                                                                                                                                                                                                                                                                                                        |                    |
| Background/rationale      | 2      | Explain the scientific background and rationale for the investigation being reported                                                                                                                                                                                                                                                                                                                                                                                   | 1-4                |
| Objectives                | 3      | State specific objectives, including any pre-specified hypotheses                                                                                                                                                                                                                                                                                                                                                                                                      | 3-4                |
| <b>Methods</b>            |        |                                                                                                                                                                                                                                                                                                                                                                                                                                                                        |                    |
| Study design              | 4      | Present key elements of study design early in the paper                                                                                                                                                                                                                                                                                                                                                                                                                | 4                  |
| Setting                   | 5      | Describe the setting, locations, and relevant dates, including periods of recruitment, exposure, follow-up, and data collection                                                                                                                                                                                                                                                                                                                                        | 4                  |
| Participants              | 6      | (a) <i>Cohort study</i> —Give the eligibility criteria, and the sources and methods of selection of participants. Describe methods of follow-up<br><i>Case-control study</i> —Give the eligibility criteria, and the sources and methods of case ascertainment and control selection. Give the rationale for the choice of cases and controls<br><i>Cross-sectional study</i> —Give the eligibility criteria, and the sources and methods of selection of participants | 4                  |
|                           |        | (b) <i>Cohort study</i> —For matched studies, give matching criteria and number of exposed and unexposed<br><i>Case-control study</i> —For matched studies, give matching criteria and the number of controls per case                                                                                                                                                                                                                                                 |                    |
| Variables                 | 7      | Clearly define all outcomes, exposures, predictors, potential confounders, and effect modifiers. Give diagnostic criteria, if applicable                                                                                                                                                                                                                                                                                                                               | 6-7                |
| Data sources/ measurement | 8*     | For each variable of interest, give sources of data and details of methods of assessment (measurement). Describe comparability of assessment methods if there is more than one group                                                                                                                                                                                                                                                                                   | 6-7                |
| Bias                      | 9      | Describe any efforts to address potential sources of bias                                                                                                                                                                                                                                                                                                                                                                                                              | 14                 |
| Study size                | 10     | Explain how the study size was arrived at                                                                                                                                                                                                                                                                                                                                                                                                                              | 8                  |
| Quantitative variables    | 11     | Explain how quantitative variables were handled in the analyses. If applicable, describe which groupings were chosen and why                                                                                                                                                                                                                                                                                                                                           | 7                  |
| Statistical methods       | 12     | (a) Describe all statistical methods, including those used to control for confounding                                                                                                                                                                                                                                                                                                                                                                                  | 7                  |
|                           |        | (b) Describe any methods used to examine subgroups and interactions                                                                                                                                                                                                                                                                                                                                                                                                    | 7                  |
|                           |        | (c) Explain how missing data were addressed                                                                                                                                                                                                                                                                                                                                                                                                                            | 7                  |
|                           |        | (d) <i>Cohort study</i> —If applicable, explain how loss to follow-up was addressed<br><i>Case-control study</i> —If applicable, explain how matching of cases and controls was addressed                                                                                                                                                                                                                                                                              | 9-10               |

|                          |     |                                                                                                                                                                                                                                                                                                                                                                                                               |          |
|--------------------------|-----|---------------------------------------------------------------------------------------------------------------------------------------------------------------------------------------------------------------------------------------------------------------------------------------------------------------------------------------------------------------------------------------------------------------|----------|
|                          |     | <i>Cross-sectional study</i> —If applicable, describe analytical methods taking account of sampling strategy                                                                                                                                                                                                                                                                                                  |          |
|                          |     | (e) Describe any sensitivity analyses                                                                                                                                                                                                                                                                                                                                                                         |          |
| <b>Results</b>           |     |                                                                                                                                                                                                                                                                                                                                                                                                               |          |
| Participants             | 13* | (a) Report numbers of individuals at each stage of study—eg numbers potentially eligible, examined for eligibility, confirmed eligible, included in the study, completing follow-up, and analysed<br>(b) Give reasons for non-participation at each stage<br>(c) Consider use of a flow diagram                                                                                                               | 8-9      |
| Descriptive data         | 14* | (a) Give characteristics of study participants (eg demographic, clinical, social) and information on exposures and potential confounders<br>(b) Indicate number of participants with missing data for each variable of interest<br>(c) <i>Cohort study</i> —Summarise follow-up time (eg, average and total amount)                                                                                           | 8-9<br>9 |
| Outcome data             | 15* | <i>Cohort study</i> —Report numbers of outcome events or summary measures over time<br><i>Case-control study</i> —Report numbers in each exposure category, or summary measures of exposure<br><i>Cross-sectional study</i> —Report numbers of outcome events or summary measures                                                                                                                             | 6-7      |
| Main results             | 16  | (a) Give unadjusted estimates and, if applicable, confounder-adjusted estimates and their precision (eg, 95% confidence interval). Make clear which confounders were adjusted for and why they were included<br>(b) Report category boundaries when continuous variables were categorized<br>(c) If relevant, consider translating estimates of relative risk into absolute risk for a meaningful time period | 10-12    |
| Other analyses           | 17  | Report other analyses done—eg analyses of subgroups and interactions, and sensitivity analyses                                                                                                                                                                                                                                                                                                                |          |
| <b>Discussion</b>        |     |                                                                                                                                                                                                                                                                                                                                                                                                               |          |
| Key results              | 18  | Summarise key results with reference to study objectives                                                                                                                                                                                                                                                                                                                                                      | 12-13    |
| Limitations              | 19  | Discuss limitations of the study, taking into account sources of potential bias or imprecision. Discuss both direction and magnitude of any potential bias                                                                                                                                                                                                                                                    | 14-15    |
| Interpretation           | 20  | Give a cautious overall interpretation of results considering objectives, limitations, multiplicity of analyses, results from similar studies, and other relevant evidence                                                                                                                                                                                                                                    | 13-14    |
| Generalisability         | 21  | Discuss the generalisability (external validity) of the study results                                                                                                                                                                                                                                                                                                                                         | 14-15    |
| <b>Other information</b> |     |                                                                                                                                                                                                                                                                                                                                                                                                               |          |
| Funding                  | 22  | Give the source of funding and the role of the funders for the present study and, if applicable, for the original study on which the present article is based                                                                                                                                                                                                                                                 | 15       |

\*Give information separately for cases and controls in case-control studies and, if applicable, for exposed and unexposed groups in cohort and cross-sectional studies.

**Note:** An Explanation and Elaboration article discusses each checklist item and gives methodological background and published examples of transparent reporting. The STROBE checklist is best used in conjunction with this article (freely available on the Web sites of PLoS Medicine at <http://www.plosmedicine.org/>, Annals of Internal Medicine at <http://www.annals.org/>, and Epidemiology at <http://www.epidem.com/>). Information on the STROBE Initiative is available at [www.strobe-statement.org](http://www.strobe-statement.org).

# Please wait...

If this message is not eventually replaced by the proper contents of the document, your PDF viewer may not be able to display this type of document.

You can upgrade to the latest version of Adobe Reader for Windows®, Mac, or Linux® by visiting [http://www.adobe.com/go/reader\\_download](http://www.adobe.com/go/reader_download).

For more assistance with Adobe Reader visit <http://www.adobe.com/go/acrreader>.

Windows is either a registered trademark or a trademark of Microsoft Corporation in the United States and/or other countries. Mac is a trademark of Apple Inc., registered in the United States and other countries. Linux is the registered trademark of Linus Torvalds in the U.S. and other countries.

# Please wait...

If this message is not eventually replaced by the proper contents of the document, your PDF viewer may not be able to display this type of document.

You can upgrade to the latest version of Adobe Reader for Windows®, Mac, or Linux® by visiting [http://www.adobe.com/go/reader\\_download](http://www.adobe.com/go/reader_download).

For more assistance with Adobe Reader visit <http://www.adobe.com/go/acrreader>.

Windows is either a registered trademark or a trademark of Microsoft Corporation in the United States and/or other countries. Mac is a trademark of Apple Inc., registered in the United States and other countries. Linux is the registered trademark of Linus Torvalds in the U.S. and other countries.



**A preliminary prospective study of nutritional, psychological and combined therapies for Myalgic Encephalomyelitis/Chronic Fatigue Syndrome (ME/CFS) in a private care setting.**

|                                 |                                                                                       |
|---------------------------------|---------------------------------------------------------------------------------------|
| Journal:                        | <i>BMJ Open</i>                                                                       |
| Manuscript ID:                  | bmjopen-2012-001079.R2                                                                |
| Article Type:                   | Research                                                                              |
| Date Submitted by the Author:   | 19-Jul-2012                                                                           |
| Complete List of Authors:       | Arroll, Megan; The Optimum Health Clinic,<br>Howard, Alex; The Optimum Health Clinic, |
| <b>Primary Subject Heading</b>: | Patient-centred medicine                                                              |
| Secondary Subject Heading:      | Complementary medicine, Nutrition and metabolism                                      |
| Keywords:                       | COMPLEMENTARY MEDICINE, SOCIAL MEDICINE, REHABILITATION MEDICINE                      |
|                                 |                                                                                       |

SCHOLARONE™  
Manuscripts

## Abstract

Background: Myalgic Encephalomyelitis/Chronic Fatigue Syndrome (ME/CFS) is a condition ~~characterised~~[characterized](#) by severe and persistent fatigue, neurological disturbances, autonomic and endocrine dysfunctions and sleep difficulties that have a pronounced and significant impact on individuals' lives. Current NICE guidelines within the United Kingdom suggest that this condition should be treated with cognitive ~~behavioural~~[behavioral](#) therapy and/or graded exercise therapy where appropriate. There is currently a lack of evidence base concerning other, more integrative interventions that may be beneficial to those with ME/CFS.

Objectives: This study aimed to evaluate whether three patient-centered treatment modalities of psychology, nutrition and combined treatment, [influenced symptom report measures in those with reduced symptomatology](#) of ME/CFS over a 3-month time period and whether there were significant differences in these changes between groups.

Design and setting: This is a ~~preliminary prospective longitudinal observational~~ study [with one follow-up point](#) conducted at ~~a one~~ private secondary health care facility in London, UK.

Participants: One-hundred and thirty-eight individuals (110 females, 79.7%; 42 participants in psychology, 44 in nutrition and 52 in combined) participated at baseline and 72 participants completed the battery of measures at follow-up (52.17% response rate; 14, 27, 31 participants in each group, respectively).

Outcome measures: Self-report measures of ME/CFS symptoms, functional ability, multidimensional fatigue, perceived control and maladaptive stress.

Results: Baseline comparisons showed those in the combined group had higher levels of fatigue. At follow-up, all groups saw improvements in fatigue, functional physical symptomatology and maladaptive stress; those within the psychology group also experienced a shift in perceived control over time. ~~The psychology group demonstrated a significantly greater change in fatigue and perceived control than the combined group; however, the opposite relationship was observed for headaches.~~



Conclusions: This study provides early evidence that patient-centered techniques for the treatment of ME/CFS may influence appear promising in reducing symptomatology, fatigue, function, perceived control and inappropriate responses to stressors, and increasing function and perceived control. However, these results must be viewed with caution as the allocation to groups was not randomized, there was no control group and the study suffered from high drop-out rates. The need for further studies of integrative treatment with robust designs appears warranted.

## **Summary**

### **Article focus**

- This preliminary prospective observational study investigated three (psychological, nutritional and combined) tailored patient-centered interventions for ME/CFS over time.
- Differences between the reported changes over time between groups were also assessed.

### **Key messages**

- Patient-centered approaches for the management of ME/CFS reduce symptomatology influence symptomatology over time in some individuals with this disorder.
- Self-reported (Functional ability, (-physical and social), are influenced increase with following tailored interventions lasting 3 months-
- Psychological intervention can help individuals to regain a sense of control over their condition-
- This study provides preliminary evidence that tailored psychological, nutritional and Combined interventions may be effective treatments for some people with ME/CFS; however due to the study's methodological limitations, it is important that this potential treatment effect is investigated further in high quality randomized controlled studies.

### **Strengths and limitations of this study**

**Formatted:** Font: Not Bold, No underline

**Formatted:** Font: Not Bold, No underline

**Formatted:** List Paragraph, Bulleted + Level: 1 + Aligned at: 0.25" + Indent at: 0.5"

**Formatted:** Font: Not Bold, No underline

- The findings here are an initial step to fill the gap in the extant literature regarding the utility of tailored, multidisciplinary and patient-centered treatments for ME/CFS.
- There is bias in this study as the participants were self-selected in the sense that they chose to attend the clinic and which treatment option they preferred (with advice), i.e. the study was not randomized.
  - There were low retention rates in this study which may constitute a bias in that those who remained in the study may have experienced benefits and those who experienced little or no benefits may have dropped out.

Formatted: List Paragraph, Bulleted + Level: 1 + Aligned at: 0.25" + Indent at: 0.5"

### **Introduction**

Chronic Fatigue Syndrome or myalgic encephalomyelitis (ME/CFS) is a condition characterized by prolonged and debilitating fatigue, although the exact cause of this disorder is still under debate. Due to the lack of a definitive biological marker, diagnosis is made on the basis of the exclusion of other explanatory conditions. The most widely used case definition by the Centers for Disease Control <sup>1</sup> states that there must be at least six months severe fatigue of new and definite onset, not the result of ongoing exertion, not alleviated by rest and resulting in reduced levels of physical activity. The CDC definition also sets out a series of minor complaints that must accompany the fatigue (cognitive impairment, sore throat, tender cervical or axillary lymph nodes, muscle pain, multi-joint pain, headaches of a new type, pattern or severity at onset, unrefreshing sleep and post-exertion malaise), with individuals needing to have the occurrence of four or more symptoms to be diagnosed with

1  
2  
3  
4  
5  
6  
7 ME/CFS. Estimates of the prevalence of ME/CFS have been made as low as 3 and as high as  
8  
9 2,800 per 100,000 <sup>2</sup>.

10  
11  
12 The most widely researched strategies for alleviating the symptoms of ME/CFS are Cognitive  
13  
14 Behavior Therapy (CBT) and Graded Exercise Therapy (GET). Two reviews of studies on  
15  
16 CBT <sup>3,4</sup> found that it significantly improved physical functioning in adult out-patients as  
17  
18 compared with medical management, counseling, guided support, education and support or  
19  
20 relaxation. ~~However, the longitudinal evidence for CBT is inconsistent and there is a lack of~~  
21  
22 ~~evidence with regard to CBT in combination with other treatments~~<sup>4</sup>. Regarding GET, a  
23  
24 systematic review illustrated that this form of therapy was potentially beneficial for people  
25  
26 with ME/CFS, especially when combined with a patient education programme<sup>5</sup>. However,  
27  
28 drop-out rates were high in the GET groups suggesting that individuals with ME/CFS are  
29  
30 adverse to this type of therapy. Recently, a large scale, longitudinal study investigating CBT,  
31  
32 GET, Adaptive Pacing Therapy (APT) and specialist medical care (SMC) found that CBT  
33  
34 and GET (when added to SMC) were moderately effective outpatient treatments for this  
35  
36 patient group as opposed to APT or SMC alone <sup>6</sup>.

37  
38  
39 Although CBT and GET studies have shown some promising outcomes, there is no known  
40  
41 cure for ME/CFS. Therefore the National Institute for Health and Clinical Excellence (NICE)  
42  
43 <sup>7,6</sup> recommends a number of symptom management strategies and interventions aimed at  
44  
45 helping individuals to cope with their condition and reduce physical deconditioning brought  
46  
47 about by the illness. Pharmacological interventions are, at times, suggested for patients with  
48  
49 poor sleep or pain, for instance, low-dose antidepressants, as these have been shown to be  
50  
51 effective <sup>8-14,13</sup>. However, patient expectations must be realistic as the drugs may help  
52  
53 elevate mood and psychological outlook but not reduce fatigue and other symptomatology  
54  
55  
56  
57  
58  
59  
60

1  
2  
3  
4  
5  
6 associated with ME/CFS<sup>1514</sup>. Numerous drugs such as thyroxin, hydrocortisone and antiviral  
7 agents are not advised by NICE due to contradictory findings<sup>16:1715;16</sup>.  
8  
9

10  
11  
12 In terms of function and quality of life management, NICE offers general advice concerning  
13 sleep management, appropriate rest periods, and pacing. Sleep hygiene instruction, together  
14 with pharmacological treatment tailored to the individual patient can be beneficial in  
15 combating fatigue<sup>1817</sup>. Dietary management may also reduce symptomatology for those with  
16 concurrent irritable bowel syndrome (IBS). Management approaches recommended for IBS,  
17 such as diet restriction, are thus also recommended for those with ME/CFS<sup>1918</sup>. Dietary  
18 supplementation has been investigated in relation to ME/CFS. Fatty acids<sup>2019</sup>, folic acid<sup>2120</sup>,  
19 vitamin C<sup>2221</sup>, co-enzyme Q10<sup>2322</sup>, magnesium<sup>2423</sup>, multivitamins<sup>2524</sup> and minerals<sup>2625</sup> have  
20 all been shown to reduce symptomatology in ME/CFS patients. However other studies have  
21 shown conflicting findings with regard to nutritional supplementation, therefore it is perhaps  
22 wise to treat with supplements on a case-by-case basis<sup>27:2826;27</sup>.  
23  
24  
25  
26  
27  
28  
29  
30  
31  
32  
33

34  
35 Due to the lack of clear and definitive treatment strategies, individuals often seek out  
36 Complementary and Alternative Medicines (CAM). Although NICE does not recommend the  
37 use of CAM they do acknowledge that many people with ME/CFS use such therapies and  
38 find them beneficial for symptom management. This view is due to the lack of published  
39 evidence for the effectiveness of these treatments. Examples of CAM treatments used by  
40 individuals with ME/CFS include religious healing, massage therapy, relaxation, meditation,  
41 homeopathy, acupuncture, naturopathy and herbal therapies<sup>29:3028;29</sup>; patient satisfaction with  
42 such approaches as CAM has been high, over 80% in some instances<sup>2928</sup>. A recent systematic  
43 review of such interventions identified 70 controlled clinical trials (randomized and non-  
44 randomized) and found that 86% of these studies illustrated at least one positive effect, with  
45  
46  
47  
48  
49  
50  
51  
52  
53  
54  
55  
56  
57  
58  
59  
60

1  
2  
3  
4  
5  
6  
7 74% showing a decrease of illness-related symptomatology <sup>3130</sup>. Meditative or mindfulness  
8 approaches warranted further investigation based on these results as did supplement programs  
9 of magnesium, l-carnitine, and S-adenosylmethionine. A subsequent review based solely on  
10 randomized controlled trials (RCTs) of CAM techniques identified 26 such studies and  
11 observed that qigong, massage and tuina (approaches based within Chinese Traditional  
12 Medicine and based upon relaxation and connection with the body) illustrated positive effects  
13 as did supplementation studies utilizing nicotinamide adenine dinucleotide (NADH) and  
14 magnesium <sup>3234</sup>. However, within both reviews it was noted that the methodological quality  
15 of reporting was poor and the sample sizes in these studies were small; hence ability to draw  
16 strong conclusions on the efficacy of CAM methods is limited. Porter et al. (2010) <sup>31</sup> did note  
17 that patient-centered, individualized treatment protocols which include a range of tailored  
18 strategies are a promising area for further investigation for this complex, multi-system illness.  
19  
20  
21  
22  
23  
24  
25  
26  
27  
28  
29  
30  
31  
32  
33  
34

### 35 Objectives

36  
37 There is still much debate and uncertainty regarding the most effective treatment for  
38 ME/CFS. Recent reviews of CAM techniques highlight the need for further exploration of  
39 patient-centered and individually tailored interventions for the alleviation of the condition's  
40 often debilitating and intrusive symptomatology. This study therefore aims to provide  
41 preliminary evidence for the utility ~~evaluate the effectiveness of three of three~~ types of  
42 patient-centered approaches to the management of ME/CFS over time (baseline and follow-  
43 up) offered at a private health-care center in the UK.  
44  
45  
46  
47  
48  
49  
50

### 51 Methods

52  
53  
54  
55  
56  
57  
58  
59  
60

### Study design and setting

This ~~preliminary prospective a longitudinal observational~~ study ~~which~~ aimed to [explore the effectiveness of evaluate](#) three treatment options offered to individuals with ME/CFS. The research was conducted at one private secondary health care facility. All ~~potential prospective~~ patients of the clinic are first asked to complete a comprehensive symptom profile and medical history, including questions relating to triggering factors, psychology sub-types and structural/biological sub-types (this is distinct from the research data collected). Subsequent to this, every individual receives a 15-minute screening with one of the practitioners ([please note, this was not either of the authors of the current study](#)) who recommends the best course of action for his/her needs; this will be the psychology-related interventions, nutritional advice and support or a combination of the two.

All individuals requesting treatment at the private care setting were offered the opportunity to participate in the study. Those that expressed an interest ([N = 145](#)) were emailed a spreadsheet that contained the questionnaires and asked to complete it at their convenience. Informed consent was obtained prior to the completion of the questionnaires and the study was approved by the University of East London Ethics Committee. Participants were told that they could withdraw from the study at any time and that withdrawal would not affect their care at the clinic. Participants were able to ask questions at any point in the study and no deception was used as the participants were informed of the nature of the research program before they agreed to participate. [Subsequently, participants were requested to complete the questionnaire pack on a second occasion, three months from the baseline measures.](#)

*Psychology*

1  
2  
3  
4  
5  
6  
7 The clinic offers a 3-month intervention which consists of a combination of Neuro-linguistic  
8 Programming (NLP), Emotional Freedom Technique (EFT), life coaching and  
9 hypnotherapy/self-hypnosis constructed in a manner specific to the needs of those with  
10 ME/CFS. The primary aim of this approach is to reduce the anxiety that is associated with  
11 having a debilitating and unpredictable condition, improve emotional well-being and help  
12 individuals slowly manage and increase their activity within their own limits (i.e. pacing).  
13  
14 The program is offered as a series of group sessions and the peer support is seen as an  
15 important component of the intervention, which is solidified via the use of moderated online  
16 support forums, narratives of previous clients' experiences and online materials that can be  
17 accessed as often as necessary. In addition to, or as an alternative to this course, individuals  
18 receive a series of one-to-one sessions and for the most severely affected ME/CFS patients,  
19 telephone sessions are arranged and support materials can be accessed in their own homes.

20  
21  
22 Over the three-month period of this preliminary study, the participants experienced one of  
23 three treatment options. The first option included 13 hours of practitioner contact time in a  
24 mix of group training in person, group telephone conference calls and one-to-one telephone  
25 sessions, the second option was four hours of one-to-one telephone sessions and the final  
26 option was three hours of in person sessions. Participants all had access to various support  
27 materials which included CDs and online resources. The amount of time spent on these was  
28 patient-led, but was in the region of a further six hours. All the practitioners offering this  
29 option are qualified in hypnotherapy, NLP, life coaching and EFT and undergo an intensive  
30 period of training in the clinic's own integrative approach (please see Howard and Arroll <sup>33</sup>  
31 for more details of this approach) and ongoing supervision (individual and group supervision  
32 on a biweekly basis) from the department director, who is the only senior practitioner in the  
33 team.

### *Nutrition*

Tailored nutritional therapy is achieved via one-to-one consultations with individuals. To begin, a very detailed history is taken based upon the information given in the aforementioned symptom profile. Qualified nutritional therapists (who have been given specialist training regarding ME/CFS from the clinic) then suggest tests consistent with symptomatology, for instance the Adrenal Stress Index Test, comprehensive stool analysis/gastro-intestinal function, vitamin & mineral status, etc. Results from these tests are then used to compose an evidence-driven diet and supplement program. As most cases of ME/CFS are complex involving multiple body systems, this process is often iterative and follow-up consultations are necessary to check progress and make alterations to the protocol.

The nutritional therapy program consists of an initial one-hour evaluation (which includes the tailored advice) and follow-up approximately every six weeks; therefore, during the course of the present study, the participants received a minimum of two one-hour sessions with email support for any queries and detailed nutritional guidance. All the nutritional therapists are qualified to diploma level and members of (voluntary) regulatory bodies such as the British Association for Applied Nutrition and Nutritional Therapy (BANT) and the Complementary and Natural Healthcare Council (CNHC). Similar to the psychology department, the nutrition department is led by one senior practitioner who supervises the team with individual and group supervisory arrangements.

### *Combined*



1  
2  
3  
4  
5  
6  
7 Within the combined program, a multidisciplinary approach is taken with practitioners  
8 discussing the patients in case meetings to ensure that the psychological and nutritional  
9 aspects complement each other in order to achieve the best outcome. [It should be noted that](#)  
10 [the interventions in the combined program are phased-in as it was found that asking](#)  
11 [individuals to engage in numerous therapeutic activities at the same time resulted in high](#)  
12 [drop-out rates.](#)  
13  
14  
15  
16  
17  
18  
19

### 20 **[Primary Outcome Measures](#)**

#### 21 *Medical Outcomes Survey Short-Form 36 (SF-36)*

22 This 36-item measure is the short form of the original Medical Outcomes Survey [3432](#) to  
23 measure functional impairment and contains eight sub-sections: 1) physical activity  
24 limitations due to health problems; 2) social activity limitations due to physical or emotional  
25 problems; 3) usual role activity limitations due to physical health problems; 4) bodily pain; 5)  
26 general mental health; 6) role activity limitations due to emotional problems; 7) vitality  
27 (energy and fatigue); and 8) general health perceptions [3432](#). The items are scored so that  
28 higher scores indicate greater functional ability. In terms of the psychometric properties of  
29 this measure, reliability estimates for all sub-scales are good, exceeding a Cronbach's alpha  
30 coefficient value of 0.70 [3533](#). In terms of validity, the SF-36 correlates amply,  $r \geq 0.40$ , with  
31 the frequency and severity of numerous symptoms and general health conditions [36:37,34:35](#).  
32  
33  
34  
35  
36  
37  
38  
39  
40  
41  
42  
43  
44  
45  
46  
47  
48

#### 49 *Multidimensional Health Locus of Control Scale (MHLCS)*

50 [Multidimensional Health Locus of Control](#) <sup>36-38</sup> ~~measures perceived control via three distinct~~  
51 ~~sub-scales: 'internal', 'chance' and 'powerful others' which has two dimensions, that of~~  
52  
53  
54  
55  
56  
57  
58  
59  
60

~~'doctors' and 'other people'. The instrument contains 18 items in total (six items each for the internal and chance scales and three items for both the powerful others scales) and is scored on a 6 point Likert scale from 'strongly agree' to 'strongly disagree'. Internal reliability of the instrument is good with Cronbach's alpha coefficients ranging from 0.67 for 'powerful others' to 0.77 for 'internal'. The measure correlates positively and significantly with associated scales from Levenson's<sup>39</sup> locus of control measure from which the MHLOC was based upon, which demonstrates good convergent validity<sup>36</sup>.~~

### *Multidimensional Fatigue Inventory (MFI)*

This 20-item measure contains five fatigue dimensions: general fatigue, physical fatigue, mental fatigue, reduced motivation and reduced activity<sup>38,40</sup>. Items such as 'I tire easily' are rated on a 5-point scale (1 = yes, that is true; 5 = no, that is not true) with lower scores reflecting higher levels of fatigue. The MFI has good internal consistency with average Cronbach's alpha coefficient equaling 0.84 across the sub-scales. Convergent validity based on a sample of radiotherapy patients found correlations between the sub-scales and a visual analog fatigue scale to be 0.77 for general fatigue, 0.70 for physical fatigue, 0.61 for reduced activity, 0.56 for reduced motivation ( $p < 0.001$ ) to 0.23 for mental fatigue ( $p < 0.01$ )<sup>38,40</sup>.

### Secondary Outcome Measures (ME/CFS-specific)

#### *CDC CFS Symptom Inventory*

CDC CFS Symptom Inventory<sup>39,41</sup> was used to measure specific ME/CFS symptoms and confirm diagnosis. This instrument is based upon the CDC case definition<sup>1</sup> and includes a fatigue item and the eight distinct symptoms are also included in the CDC guidelines with an additional ten associated symptoms. The format of this self-report measure is a six-point scale of perceived frequency (0 = absent, 5 = all the time) and severity (0 = none, 5 = very severe). The psychometric properties of this instrument are good: Cronbach's alpha coefficient = 0.88;

Formatted: Superscript

Formatted: Font: Bold

1  
2  
3  
4  
5  
6  
7  
8  
9  
10  
11  
12  
13  
14  
15  
16  
17  
18  
19  
20  
21  
22  
23  
24  
25  
26  
27  
28  
29  
30  
31  
32  
33  
34  
35  
36  
37  
38  
39  
40  
41  
42  
43  
44  
45  
46  
47  
48  
49  
50  
51  
52  
53  
54  
55  
56  
57  
58  
59  
60

$r = .74$  convergent validity with the Chalder Fatigue Scale <sup>40,42</sup>;  $r = -.68$  and  $-.87$  convergent validity with the SF-36 'vitality' and 'bodily pain' sub-scales, respectively.

### **Secondary Outcome Measures (psychological)**

Formatted: Font: Bold

#### *Multidimensional Health Locus of Control Scale (MHLCS)*

Formatted: Font: Italic

Multidimensional Health Locus of Control <sup>41-43</sup> measures perceived control via three distinct sub-scales: 'internal', 'chance' and 'powerful others' which has two dimensions, that of 'doctors' and 'other people'. The instrument contains 18 items in total (six items each for the 'internal' and 'chance' scales and three items for both the 'powerful others' scales) and is scored on a 6-point Likert scale from 'strongly agree' to 'strongly disagree'. Internal reliability of the instrument is good with Cronbach's alpha coefficients ranging from 0.67 for 'powerful others' to 0.77 for 'internal'. The measure correlates positively and significantly with associated scales from Levenson's <sup>44</sup> locus of control measure from which the MHLOC was based, which demonstrates good convergent validity <sup>41</sup>.

#### *Maladaptive Stress Index*

This 32-item measure contains three sub-scales (cognitive/mood, sleep and ME/CFS symptoms) and was designed specifically for this population <sup>45,43</sup>. Items such as 'I constantly replay or pre-empt situations and conversations' are scored on a 5-point scale where 1 = never true and 5 = always true; higher scores illustrate a greater degree of disturbance.

### **Statistical methods**

The data was initially screened for missing data. Four cases contained substantial amounts of missing data; therefore these were excluded from the analysis (one individual from the nutrition group and three from the combined group). Once this was done, all the variables had

1  
2  
3  
4  
5  
6  
7 less than 5% missing data, hence mean substitution was carried out in line with guidance <sup>4644</sup> .  
8  
9 The baseline data was subsequently of the quality for parametric tests, except for the  
10 variables CDC CFS swollen lymph nodes and glands, memory problems, abdominal pain and  
11 depression. However, the follow-up data suffered from high levels of skew and kurtosis  
12 which was not substantially alleviated by data transformation. This violated a key criterion  
13 for parametric testing, that of normality of distribution, so non-parametric tests were selected.  
14  
15 In addition, as the sample sizes in each individual treatment group were small, the more  
16 conservative non-parametric tests were the preferred choice as even though tests such as  
17 analysis of variance are generally robust against non-normality, this does not hold true with  
18 small sample sizes. ~~For baseline data, One-way analysis of variance tests and Kruskal-~~  
19 ~~Wallis tests (the former for those variables that met the criteria for parametric tests, and the~~  
20 ~~latter that did not) were used to investigate baseline variation difference between groups;~~  
21 ~~Wilcoxon sign rank tests were employed to look for differences over time (baseline and 3-~~  
22 ~~month follow up) and analysis of covariance (ANCOVA) tests were used to account for this~~  
23 ~~variation and test to for differences between the three groups. Kruskal Wallis tests were~~  
24 ~~performed to investigate group differences in measures of change as evaluated by mean~~  
25 ~~change scores, with Bonferroni corrected Mann Whitney tests calculated to identify post hoc~~  
26 ~~differences between groups if the Kruskal Wallis tests were significant. Wilcoxon sign-rank~~  
27 ~~tests were employed to look for differences over time (baseline and 3-month follow-up) and~~  
28 ~~if differences were significant, percentage change was calculated. Please note, as this is an~~  
29 ~~exploratory study with only one time-point and no control group, any significant findings do~~  
30 ~~not infer clinical significance, rather statistical significance, and as such exact p-values are~~  
31 ~~presented.~~  
32  
33  
34  
35  
36  
37  
38  
39  
40  
41  
42  
43  
44  
45  
46  
47  
48  
49  
50

## 51 52 53 **Results** 54 55 56 57 58 59 60

## Participants

Of the 145 individuals who expressed an interest in the study, 142 time-one questionnaires were returned, equating to a 97.9% response rate at baseline (two participants from the psychology group and one from the combined group dropped out at this stage). Therefore, excluding the four cases deleted due to insufficient data, 138 ~~One hundred and thirty eight cases were used for baseline analysis; individuals completed the questionnaire battery at time one (excluding the four deleted cases);~~ 42 participants in the psychology group, 44 in the nutrition group and 52 in the combined group. There was no significant association between gender and group ( $\chi^2(2) = 0.179, p = .915 > .05$ ), all groups consisting of approximately one-fifth males (Table 1). There was not a significant difference in age ( $F(2,135) = 0.0010, p = 1.000 > .05$ ); in fact group means for age were near identical at 42.881, 42.864 and 42.843 for psychology, nutrition and combined groups, respectively. There was also a non-significant result for illness duration ( $F(2, 135) = 0.252, p = .778 > .05$ ). Therefore, in terms of demographics, the groups were comparable. With regard to the outcome measures, there were significant differences between the groups in terms of the MFI sub-scale 'general fatigue' ( $F(2, 135) = 3.219, p = .043 < .05$ ), MFI 'physical fatigue' ( $F(2, 135) = 3.343, p = .038 < .05$ ) and the CDC CFS symptom 'swollen lymph nodes and glands' ( $H(2) = 7.161, p = .028 < .05$ ). To investigate the source of these differences, post-hoc tests were conducted (unrelated t-tests for the fatigue variables and Mann-Whitney tests for swollen lymph glands as the former did not meet criteria for parametric tests, all with Bonferroni correction for multiple comparisons). A significant difference was observed between the psychology and combined groups with regards to general fatigue ( $t(92) = -2.449, p = .016 < .05$ ) and physical fatigue ( $t(92) = -2.658, p = .009 < .05$ ) and also between the nutrition and psychology group in terms of the degree of lymph node and gland swelling ( $U = 635.00, p = .009 < .05$ ). Within the fatigue measures, the combined group reported

Formatted: Font: Not Italic

Formatted: Font: Not Italic

Formatted: Font: Not Italic

1  
2  
3  
4  
5  
6  
7 significantly higher levels of both general and physical fatigued than the psychology group  
8 whereas those undertaking nutritional support stated a higher occurrence of swollen lymph  
9 nodes and glands.  
10  
11

#### 12 13 14 *Retention analysis*

15  
16 Seventy-two of the original 138 participants ([14 participants in the psychology group, 27 in](#)  
17 [the nutrition group and 31 in the combined group](#)) completed the battery of measures at the 3-  
18 month follow-up, [resulting in retention rates of \(52.17% in the study overall, 33.33% in the](#)  
19 [psychology group, 61.36% in the nutrition group and 59.62% in the combined group](#)). To  
20 investigate whether the individuals who did not complete the time-two measures were  
21 significantly different from those at baseline on demographic and outcome measures, a series  
22 of t-tests and Mann-Whitney tests were performed. Those that dropped out of the research  
23 (although still receiving treatment at the clinic) differed significantly in terms of age ( $t(136) =$   
24  $-2.227, p = .028 < .05$ ) and illness duration ( $t(136) = -2.549, p = .012 < .05$ ). Those who  
25 remained in the study were of significantly older age (mean age of those that remained in the  
26 study = 45.056, SD = 11.535; mean age of drop-outs = 40.400, SD = 12.932) and longer  
27 illness duration than those who dropped out (mean age of those that remained in the study =  
28 10.836, SD = 7.383; mean illness duration of drop-outs = 7.571, SD = 7.472). Individuals who  
29 did not remain in the study did not differ significantly in terms of gender ( $\chi^2(2) = 1.222, p =$   
30 [.269 > .05](#)) or any of the outcome measures.  
31  
32  
33  
34  
35  
36  
37  
38  
39  
40  
41  
42  
43  
44

#### 45 46 47 Longitudinal data Comparisons within-groups across time

##### 48 49 Primary outcomes

50  
51 [The following percentage change scores represent statistically significant changes, rather than](#)  
52 [clinically significant shifts, as this was an exploratory study. \(Please see Table 2 for the exact](#)  
53  
54  
55  
56  
57  
58  
59  
60

Formatted: Font: Italic

1  
2  
3  
4  
5  
6  
7 p-value for each repeated measures comparison.) In the sample as a whole, there were  
8 improvements in all areas of the SF-36, with a 5.80% improvement in physical functioning, a  
9 63.32% improvement in role limitations due to physical difficulties, a 5.17% improvement in  
10 bodily pain, a 26.17% improvement in social functioning, a 10.58% improvement in role  
11 limitations due to emotional difficulties, a 22.30% improvement in vitality, energy or fatigue  
12 and a 36.49% improvement in general health perception. When looking at the fatigue sub-  
13 scales of the MFI, all five sub-scales showed significant reductions in fatigue; 8.55% in  
14 general fatigue, 10.98% in physical fatigue, 8.81% in reduced activity, 12.96% in reduced  
15 motivation and 12.79% in mental fatigue.

16  
17  
18  
19  
20  
21  
22  
23  
24  
25  
26 Within the group of individuals who opted for a purely psychological intervention,  
27 improvements were seen in physical functioning (16.75%), role limitations due to physical  
28 problems (84.61%), social functioning (37.81%), general mental health (19.15%), vitality,  
29 energy or fatigue (49.57%) and general health perceptions (19.01%). Also, all the MFI  
30 fatigue scales decreased over a 3-month period, 13.58% in general fatigue, 17.74% in  
31 physical fatigue, 23.20% in reduced activity, 11.42% in reduced motivation and 29.66% in  
32 mental fatigue.

33  
34  
35  
36  
37  
38  
39  
40  
41 The nutrition group saw improvements in role limitations due to physical problems (61.05%),  
42 social functioning (24.93%), vitality, energy or fatigue (35.35%), and general health  
43 perceptions (29.73%). Once again, all the MFI fatigue scales decreased over a 3-month  
44 period, 13.39% in general fatigue, 15.00% in physical fatigue, 13.28% in reduced activity,  
45 14.64% in reduced motivation and 12.83% in mental fatigue.

1  
2  
3  
4  
5  
6  
7 In terms of general health as evaluated by the SF-36 measure, the group who received both  
8 psychological and nutritional intervention reported reductions in role limitations due to  
9 physical difficulties (57.02%), social functioning (22.61%), role limitations due to emotional  
10 difficulties (29.47%) and general health perceptions (26.45%). In the combined group, only  
11 one measure of fatigue, that of physical fatigue, saw significant improvements over time  
12 (6.42%).

13  
14  
15  
16  
17  
18  
19  
20 *Secondary outcomes (ME/CFS-specific)*

Formatted: Font: Italic

21  
22 Within the CFS Symptom Inventory, there were improvements in occurrence of sore throats  
23 (46.26%), diarrhea (42.47%), fatigue after exertion (16.32%), muscle aches or muscle pains  
24 (21.01%), pain in joints (28.32%) chills (37.00%), unrefreshing sleep (19.55%), sleeping  
25 problems (17.17%), headaches (29.47%), memory problems (17.86%), difficulty  
26 concentrating (26.66%), sinus and nasal symptoms (14.95%), shortness of breath (29.08%),  
27 sensitivity to light (26.26%) and depression (39.55%) in the merged sample. Within those  
28 taking part in the psychology intervention, ratings of muscle aches or muscle pains (10.34%),  
29 chills (23.40%), memory problems (44.73%), difficulty concentrating (39.50%) and  
30 sensitivity to light (64.58%) decreased. In the nutrition group, numerous symptom-related  
31 indices also showed improvements; sore throat (56.23%), swollen lymph glands (10.09%),  
32 fatigue after exertion (13.90%), muscle aches or muscle pains (20.56%), pain in joints  
33 (16.40%), chills (40.74%), headaches (32.19%), abdominal pain (29.05%), and sensitivity to  
34 light (18.28%). Those in the combined group saw significant reductions over the 3-month  
35 interval in diarrhea (47.97%), fatigue after exertion (19.20%), chills (40.23%), headaches  
36 (36.18%) and sinus and nasal symptoms (20.56%). (Please see Table 3 for the descriptive and  
37 inferential statistics associated with these findings and the exact p-value for each repeated  
38 measures comparison.)

39  
40  
41  
42  
43  
44  
45  
46  
47  
48  
49  
50  
51  
52  
53  
54  
55  
56  
57  
58  
59  
60



Secondary outcomes (psychological)

Formatted: Font: Italic

There were no significant differences from time-one to time-two in the MHLCS sub-scale of 'chance', 'powerful others' and 'other people', however the MHLCS did illustrate significant increases in internal locus of control (30.67%) and that of doctors (47.49%) in the sample as a whole. Reductions were also observed in the Maladaptive Stress Response (11.99%) in the entire group. In the psychology group, a significant increase of 17.56% was observed in internal locus of control, a decrease of 4.67% in the perception that chance played an influential part in the individuals' lives and a significant reduction in the Maladaptive Stress Response of 16.75%. No significant differences were found from baseline to follow-up in perceived control in the nutrition group, however the way in which the individuals in this group responded to stress also decreased, by 11.54%. No significant differences were found from baseline to follow-up in perceived control as measured by the MHLCS in the combined treatment group although there was a statistically significant difference in the Maladaptive Stress Response (10.98%). (Please see Table 4 for the descriptive and inferential statistics associated with these findings and the exact p-value for each repeated measures comparison.)

Formatted: Font: Not Bold

In the sample as a whole, there were significant differences from baseline to follow up within the internal and doctors sub-scale of the MHLCS and all the CDC-CFS Symptom Inventory items bar swollen lymph nodes and glands, fever and abdominal pain. There were also significant differences in all areas of the SF-36, all the fatigue sub-scales of the MFI with the five sub-scales illustrating significant reductions in fatigue and, finally, reductions were also observed in the Maladaptive Stress Response.

Within the psychology group significant differences were also found in the SF-36 sub-scales 'physical functioning', 'role limitations due to physical problem', 'social functioning',

1  
2  
3  
4  
5  
6  
7 ~~‘general mental health’, ‘vitality, energy or fatigue’ and ‘general health perceptions’.~~  
8 ~~Regarding perceived control, significant differences were found in internal locus of control~~  
9 ~~and the perception that chance played an influential part in the individuals’ lives. Again, all~~  
10 ~~the MFI fatigue scales saw significant decreases over a 3 month period. Regarding ME/CFS~~  
11 ~~specific symptoms, ratings of muscle aches or muscle pains, chills, memory problems,~~  
12 ~~difficulty concentrating and sensitivity to light differed significantly from baseline to follow-~~  
13 ~~up in the expected direction. There was also a significant reduction in the Maladaptive Stress~~  
14 ~~Response over time.~~

15  
16  
17  
18  
19  
20  
21  
22  
23  
24 ~~The nutrition group saw significant improvements in role limitations due to physical~~  
25 ~~problems, social functioning, vitality, energy or fatigue and general health perceptions. No~~  
26 ~~significant differences were found from baseline to follow up in perceived control in the~~  
27 ~~nutrition group. Once again, all the MFI fatigue scales decreased over a 3 month period and~~  
28 ~~numerous symptom related indices also showed improvements; sore throat, swollen lymph~~  
29 ~~glands, fatigue after exertion, muscle aches or muscle pains, pain in joints, chills, headaches,~~  
30 ~~abdominal pain and sensitivity to light. The way in which the individuals in this group~~  
31 ~~responded to stress also decreased over the 3 month time period.~~

32  
33  
34  
35  
36  
37  
38  
39  
40  
41 ~~In terms of general health as evaluated by the SF 36 measure, the group who received both~~  
42 ~~psychological and nutritional intervention reported reductions in role limitations due to~~  
43 ~~physical difficulties, social functioning, role limitations due to emotional difficulties and~~  
44 ~~general health perceptions. No significant differences were found from baseline to follow up~~  
45 ~~in perceived control as measured by the MHLCS in the combined treatment group. Only one~~  
46 ~~measure of fatigue, that of physical fatigue, saw significant improvements over time.~~  
47  
48  
49 ~~Diarrhea, fatigue after exertion, chills, headaches and sinus and nasal symptoms all illustrated~~  
50  
51  
52  
53  
54  
55  
56  
57  
58  
59  
60

1  
2  
3  
4  
5  
6  
7  
8  
9  
10  
11  
12  
13  
14  
15  
16  
17  
18  
19  
20  
21  
22  
23  
24  
25  
26  
27  
28  
29  
30  
31  
32  
33  
34  
35  
36  
37  
38  
39  
40  
41  
42  
43  
44  
45  
46  
47  
48  
49  
50  
51  
52  
53  
54  
55  
56  
57  
58  
59  
60

significant reductions over the 3 month interval, as did the Maladaptive Stress Response. (See Table 2 for descriptive and inferential statistics associated with these findings and Table 3 for percentage of change over time.)

### Comparisons across groups

With correction for baseline variation, there were no significant differences between the three groups in terms of change scores.

As shown in Table 3, three of the outcome measures differed significantly in terms of change from baseline to follow up, namely the MHLCs 'chance' sub scale ( $H(2) = 7.674, p < .05$ ), the MFI 'general fatigue' sub scale ( $H(2) = 6.790, p < .05$ ) and the CDC-CFS symptom 'headaches' ( $H(2) = 6.625, p < .05$ ). In terms of perceived control and general fatigue, the psychology group differed significantly as compared to the combined group ( $U = 110.500, p < .05$ ) and ( $U = 118.000, p < .05$ ), respectively, with the psychology group seeing a greater change over time as compared to the combined group on both measures. Regarding headaches, the combined group ( $U = 118.000, p < .05$ ) improved significantly more than the psychology group. No other comparisons reached statistical significance with a Bonferroni correction for multiple comparisons.

### Discussion

#### Key results

There was statistically significant (rather than known clinically significant) change over time of numerous measures in all groups investigated. However, this is not to say that these changes were due to the interventions as the design of this study was exploratory, rather than experimental (please see below for a further critique of the design). The psychology group contained the most significant findings, including those concerned with daily functioning,

1  
2  
3  
4  
5  
6  
7 fatigue, locus of control, the cognitive CDC CFS specific symptoms and the Maladaptive  
8 Stress Response. [These findings appear consistent with outcomes from other psychological](#)  
9 [interventions](#) <sup>3;4;6</sup>. As expected, changes in perceived control were not observed in the  
10 nutrition group as this is not an area that is targeted in this program. However, the more  
11 immune-type symptoms such as sore throat, swollen lymph nodes or glands and pain in joints  
12 did see significant reductions over time as would be envisaged in treatment protocols based  
13 upon nutritional expertise. The group that exhibited the least significant findings was the  
14 combined group and, as noted below, this may be due to the greater general severity [of](#)  
15 [symptoms](#) in this group and the need for a more lengthy intervention. Nevertheless,  
16 considering the small sample sizes in the groups at follow-up, these results are very  
17 promising and warrant further attention. ~~In terms of these preliminary findings, the~~  
18 ~~psychology group performed better with regard to lowering the belief that chance influences~~  
19 ~~the course of the condition. This is an important observation as the unpredictable nature of~~  
20 ~~ME/CFS can be one of the most difficult components for individuals to cope with~~ <sup>45</sup> ~~and~~  
21 ~~helping patients gain an improved sense of control over the illness is of great potential~~  
22 ~~benefit. The psychology group also demonstrated a significantly greater change score in~~  
23 ~~general fatigue as compared with the combined group which may infer that in the short term,~~  
24 ~~guiding individuals through the complex nature of the disorder, helping them to understand it~~  
25 ~~and accept that the condition itself gives rise to stresses and psychological distress may be a~~  
26 ~~good starting point for intervention (i.e. a stepped program could be developed).~~

### 47 Interpretation

48  
49 As noted previously <sup>31;30</sup> patient-centered, individualized treatment protocols which include a  
50 range of tailored strategies is a favorable direction for dealing with a complex and multi-  
51 system disorder such as ME/CFS. The present study has demonstrated that such interventions  
52  
53  
54  
55  
56  
57  
58  
59  
60

1  
2  
3  
4  
5  
6  
7 may be ~~are~~ useful in lowering symptomatology, improving functioning and helping  
8 individuals gain a greater sense of control over their health status. ~~Considering that the~~  
9 ~~options available on the National Health Service, mainly CBT and GET, are often perceived~~  
10 ~~as coping strategies at best, and physically damaging at worst~~<sup>46</sup>; ~~tailored treatments such as~~  
11 ~~described here may be more palatable, and hence effective.~~

### 17 18 **Limitations and Generalisability**

19  
20 This study ~~was a preliminary study in a naturalistic setting and as such did not have a robust~~  
21 ~~design. There was not~~ ~~did not have a~~ control group ~~and the participants were not randomly~~  
22 ~~assigned to groups, therefore~~ ~~so~~ the results should be treated with caution. ~~In order to~~  
23 ~~ascertain whether the changes in symptom and functional reports were due to the~~  
24 ~~interventions, a randomized control trial should be conducted (RCT). Also, the participants~~  
25 ~~were not randomly assigned to groups as this was a naturalistic, observational study. Also,~~  
26 ~~there was a high drop-out rate from time-one to time-two and this rate differed across groups.~~  
27 ~~The highest drop-out rate was in the psychology group; whilst we cannot be sure why this~~  
28 ~~occurred, it is postulated that the retention was poor in the group as the individuals in the~~  
29 ~~psychology program had more activities to engage in and may have felt overburdened with~~  
30 ~~the research questionnaires in addition to their session and homework (this would not be the~~  
31 ~~case in the combined group as the therapeutic activities are phased-in as mentioned above).~~

32  
33  
34  
35  
36  
37  
38  
39  
40  
41  
42  
43  
44  
45 In this study, ~~e~~Each individual was guided to appropriate treatment within an initial screening  
46 with clinic staff; therefore the group was dependent on the nature of the individual's  
47 symptoms and their personal choice as the programs on offer were privately funded.

48  
49  
50  
51 ~~However, as can be seen in the baseline comparisons, the groups did not differ in terms of~~  
52 ~~gender, age, illness duration or the majority of outcome measures.~~ Notably, the groups did  
53  
54  
55  
56  
57  
58  
59  
60

1  
2  
3  
4  
5  
6  
7 differ in general and physical fatigue with participants in the combined groups reporting  
8 greater fatigue than those in the psychology group which suggests that this group's general  
9 symptomatology was more severe. The combined group illustrated less ~~change~~improvement  
10 over time compared to the psychology and nutrition groups and it is feasible to infer that  
11 individuals with a greater number and degree of complaints are referred to the combined  
12 group within the clinic. ~~Also, it should be noted that the interventions in the combined~~  
13 ~~program are phased in as it was found that asking individuals to engage in numerous~~  
14 ~~therapeutic activities resulted in high drop out rates. Also, those in the combined group will~~  
15 ~~not experience the intensity of each intervention as this has been demonstrated to result in~~  
16 ~~non-compliance;~~ therefore, changes in outcome measures in this group may not be noted at  
17 an interval of three months ~~for that group~~. Further studies underway presently will investigate  
18 follow-ups at 6- and 12-months to identify whether the findings here are maintained over  
19 time and also whether those with greater symptom severity benefit with a longer intervention.  
20 The results from this study will then inform plans for an RCT of the clinic's practices. As the  
21 participants were self-selected onto these programs, the findings lack generalizability; future  
22 work should sample from the overall ME/CFS population and be randomly-assigned to  
23 groups in order to make valid assumptions regarding the illness-group as a whole.  
24  
25  
26  
27  
28  
29  
30  
31  
32  
33  
34  
35  
36  
37  
38  
39  
40

#### 41 **Funding**

42 No external funding was obtained for this research; the work was accomplished in-house at  
43 the clinic in question.  
44  
45  
46  
47  
48  
49  
50

#### 51 **Data Sharing**

52  
53  
54  
55  
56  
57  
58  
59  
60

1  
2  
3  
4  
5  
6  
7 Dataset available from the corresponding author at [m.a.arroll@sa.uel.ac.uk](mailto:m.a.arroll@sa.uel.ac.uk). Consent was not  
8 obtained for data sharing but the presented data are anonymised and risk of identification is  
9 low.  
10

### 11 12 13 14 **Contributorship**

15 Alex Howard made substantial contributions to the conception and design and acquisition of  
16 data, whilst Megan Arroll made a substantial contribution to the analysis and interpretation of  
17 data. Both authors made a substantial contribution to the drafting of the article and revisions  
18 for the critical review of important intellectual content. Final approval of the version to be  
19 published was also granted by both authors.  
20  
21  
22  
23  
24  
25

### 26 27 **Acknowledgements**

28 We would like to thank Tomas Ros for preparing the questionnaire spreadsheet, Niki Gratrix  
29 for helping in setting-up the study and Andy McLellan and Val Duschinsky for proof-reading  
30 and editing.  
31  
32  
33  
34  
35

Formatted: Font: Not Bold

### 36 37 **Competing Interests**

38 Alex Howard is the founder and CEO of The Optimum Health Clinic and Megan Arroll is the  
39 Director of Research at the Optimum Health Clinic, where this study was conducted.  
40  
41  
42  
43  
44  
45  
46  
47  
48  
49  
50  
51  
52  
53  
54  
55  
56  
57  
58  
59  
60

## List of abbreviations

ME: myalgic encephalomyelitis

CFS: Chronic Fatigue Syndrome

NICE: National Institute for Health and Clinical Excellence

CBT: Cognitive Behavioral Therapy

GET: Graded Exercise Therapy

[APT: Adaptive Pacing Therapy](#)

[SMC: specialist medical care](#)

CAM: Complementary and Alternative Medicine

NLP: Neuro-linguistic Programming

EFT: Emotional Freedom Technique

SF-36: Medical Outcomes Survey Short-Form 36

MHLCS: Multidimensional Health Locus of Control Scale

MFI: Multidimensional Fatigue Inventory

[RCT: randomized controlled trial](#)

## Reference List

- (1) Fukuda K, Straus SE, Hickie I, Sharpe MC, Dobbins JG, Komaroff A. The chronic fatigue syndrome: A comprehensive approach to its definition and study. *Annals of Internal Medicine* 1994; 121:953-959.
- (2) Jason LAE, Fennell PAE, Taylor RRE. Handbook of chronic fatigue syndrome. 2003.
- (3) Price JR, Couper J. Cognitive behaviour therapy for chronic fatigue syndrome in adults. *The Cochrane Database of Systematic Reviews* 1998; 4:1-38.
- (4) Price JR, Mitchell E, Tidy E, Hunot V. Cognitive behaviour therapy for chronic fatigue syndrome in adults. *Cochrane Database of Systematic Reviews* 2008;(Issue 3).
- (5) Edmonds M, McGuire H, Price J. Exercise therapy for chronic fatigue syndrome. *The Cochrane Database of Systematic Reviews* 2004; 3:1-25.



1  
2  
3  
4  
5  
6  
7 [\(6\) White PD, Goldsmith AL, Johnson AL, Potts L, Walwyn R, DeCesare JC et al. Comparison of adaptive pacing therapy, cognitive behaviour therapy, graded exercises therapy, and specialist medical care for chronic fatigue syndrome \(PACE\): a randomised trial. \*Lancet\* 2011; 377\(9768\):823-836.](#)

Formatted: Font: Italic

11 (76) National Institute for Health and Clinical Excellence. Chronic fatigue syndrome/myalgic encephalomyelitis (or encephalopathy): Diagnosis and management of CFS/ME in adults and children. London: NICE; 2007.

15 (87) Wearden AJ, Morriss RK, Mullis R, Strickland PL, Pearson DJ, Appleby L et al. Randomised, double-blind, placebo-controlled treatment trial of fluoxetine and graded exercise for chronic fatigue syndrome. *British Journal of Psychiatry* 1998; 172(6):485-490.

19 (98) Vercoulen JH, Swanink CM, Zitman FG, Vreden SG, Hoofs MP, Fennis JF et al. Randomised, double-blind, placebo-controlled study of fluoxetine in chronic fatigue syndrome. *Lancet* 1996; 347(9005):858-861.

23 (109) Goodnick PJ, Jorge CM. Treatment of chronic fatigue syndrome with nefazodone. *American Journal of Psychiatry* 1999; 156(5):797-798.

25 (110) Goodnick PJ. Treatment of chronic fatigue syndrome with venlafaxine. *American Journal of Psychiatry* 1996; 153(2):294.

29 (124) Goodnick PJ, Sandoval R. Psychotropic treatment of chronic fatigue syndrome and related disorders. *Journal of Clinical Psychiatry* 1993; 54(1):13-20.

31 (132) Goodnick PJ, Sandoval R, Brickman A, Klimas NG. Bupropion treatment of fluoxetine-resistant chronic fatigue syndrome. *Biological Psychiatry* 1992; 32(9):834-838.

33 (143) Hickie I. Nefazodone for patients with chronic fatigue syndrome. *Australian and New Zealand Journal of Psychiatry* 1999; 33(2):278-280.

35 (154) Levine P, Schwartz S, Furst G. Medical intervention and management. 2003.

37 (165) Afari N, Buchwald D. Chronic fatigue syndrome: A review. *American Journal of Psychiatry* 2003; 160(2):221-236.

39 (176) Reid S, Chalder T, Cleare A, Hotopf M, Wessely S. Extracts from "Clinical Evidence": Chronic fatigue syndrome. *British Medical Journal* 2000; 320:292-296.

41 (187) Lange G, Cook DB, Natelson BH. Rehabilitation and Treatment of Fatigue. 2005.

43 (198) Jones J, Boorman J, Cann P, Forbes S, Gomborne J, Heaton K et al. British Society of Gastroenterology guidelines for the management of the irritable bowel syndrome. *Gut* 2000; 47((Suppl II)):ii1-ii19.

45 (2049) Warren G, McKendrick M, Peet M. The role of essential fatty acids in chronic fatigue syndrome: A case-controlled study of red-cell membrane essential fatty acids (EFA) and a placebo-controlled treatment study with high dose of EFA. *Acta Neurologica Scandinavica* 1999; 99(2):112-116.

1  
2  
3  
4  
5  
6  
7  
8  
9  
10  
11  
12  
13  
14  
15  
16  
17  
18  
19  
20  
21  
22  
23  
24  
25  
26  
27  
28  
29  
30  
31  
32  
33  
34  
35  
36  
37  
38  
39  
40  
41  
42  
43  
44  
45  
46  
47  
48  
49  
50  
51  
52  
53  
54  
55  
56  
57  
58  
59  
60

- (219) Kaslow JE, Rucker L, Onishi R. Liver extract-folic acid-cyanocobalamin vs placebo for chronic fatigue syndrome. *Archives of Internal Medicine* 1989; 149(11):2501-2503.
- (224) Kodama M, Kodama T, Murakami M. The value of the dehydroepiandrosterone-annexed vitamin C infusion treatment in the clinical control of chronic fatigue syndrome (CFS). II. Characterization of CFS patients with special reference to their response to a new vitamin C infusion treatment. *In Vivo* 1996; 10:585-596.
- (232) Langsjoen PH, Folkers K. Isolated diastolic dysfunction of the myocardium and its response to CoQ10 treatment. *The Clinical Investigator* 1993; 71:S140-144.
- (243) Cox IM, Campbell MJ, Dowson D. Red blood cell magnesium and chronic fatigue syndrome. *Lancet* 1991; 337:757-760.
- (254) Bentler SE, Hartz AJ, Kuhn EM. Prospective Observational Study of Treatments for Unexplained Chronic Fatigue. *Journal of Clinical Psychiatry* 2005; 66(5):May-632.
- (265) Martin RWY, Ogston SA, Evans JR. Effects of Vitamin and Mineral Supplementation on Symptoms Associated with Chronic Fatigue Syndrome with Coxsackie B Antibodies. *Journal of Nutritional & Environmental Medicine* 2008; 4:11-23.
- (276) Wiebe E. N of 1 trials. Managing patients with chronic fatigue syndrome: two case reports. *Canadian Family Physician* 1996; 42:2214-2217.
- (287) Brouwers FM, Van Der Werf S, Bleijenberg G, Van Der Zee L, Van Der Meer J-WM. The effect of a polynutrient supplement on fatigue and physical activity of patients with chronic fatigue syndrome: A double-blind randomized controlled trial. *QJM: Monthly Journal of the Association of Physicians* 2002; 95(10):677-683.
- (298) Afari N, Eisenberg DM, Herrell R, Goldberg J, Kleyman E, Ashton S et al. Use of alternative treatments by chronic fatigue syndrome discordant twins. *Integrative Medicine* 2000; 2:97-103.
- (3029) Buchwald D, Garrity D. Comparison of patients with chronic fatigue syndrome, fibromyalgia, and multiple chemical sensitivities. *Archives of Internal Medicine* 1994; 154(18):2049-2053.
- (319) Porter NA, Jason LA, Boulton A, Bothne N, Coleman B. Alternative medical interventions used in the treatment and management of myalgic encephalomyelitis/chronic fatigue syndrome and fibromyalgia. *Journal of Alternative and Complementary Medicine* 2010; 16(3):235-249.
- (324) Alraek T, Lee MS, Choi TY, Cao H, Liu J. Complementary and alternative medicine for patients with chronic fatigue syndrome: A systematic review. *BMC Complementary and Alternative Medicine* 2010; 11(87):<http://www.biomedcentral.com/1472-6882/11/87>.
- (33) Howard A, Arroll M. The application of integral medicine in the treatment of myalgic encephalomyelitis/ Chronic Fatigue Syndrome. *Journal of Integral Theory and Practice* 2011; 6(4):25-40.

- 1  
2  
3  
4  
5  
6  
7 | (342) Ware JE, Sherbourne CD. The MOS 36-Item Short-Form Health Survey (SF-36).  
8 *Medical Care* 1992; 30:473-481.
- 9 | (353) Tsai C, Bayliss MS, Ware JE. Health Survey Annotated Bibliography: Second Edition  
10 (1988-1996). Boston, MA: Health Assessment Lab, New England Medical Center; 1997.
- 11 | (364) Ware JE, Kosinski M, Keller SK. SF-36® Physical and Mental Health Summary  
12 Scales: A User's Manual. Boston, MA: New England Medical Center, The Health Institute;  
13 1994.
- 14 | (375) Ware JE, Snow KK, Kosinski M, Gandek B. SF-36® Health Survey Manual and  
15 Interpretation Guide. Boston, MA: New England Medical Center, The Health Institute; 1993.
- 16 | (38) [Smets E-MA, Garssen B, Bonke B, de Haes J-CJM. The Multidimensional Fatigue  
17 Inventory \(MFI\) psychometric qualities of an instrument to assess fatigue. \*Journal of  
18 Psychosomatic Research\* 1995; 39\(3\):315-325.](#)
- 19 | (39) [Wagner D, Nisenbaum R, Heim C, Jones JF, Unger ER, Reeves WC. Psychometric  
20 properties of the CDC Symptom Inventory for assessment of Chronic Fatigue  
21 Syndrome. \*Population Health Metrics\* 2005; 3\(8\).](#)
- 22 | (40) [Chalder T, Berelozit G, Pawlikowska T, Watts L, Wessely S, Wright D et al.  
23 Development of a fatigue scale. \*Journal of Psychosomatic Research\* 1993; 37:147-153.](#)
- 24 | (4136) Wallston KA, Wallston BS, DeVellis R. Development of the  
25 Multidimensional Health Locus of Control (MHLC) Scales. *Health Education Monograph*  
26 1978; 6(2):160-170.
- 27 | (4237) Wallston KA, Stein MJ, Smith CA. Form C of the MHLC Scales: A condition-  
28 specific measure of locus of control. *Journal of Personality Assessment* 1994; 63:534-553.
- 29 | (4338) Wallston KA, Wallston BS. Health locus of control scales. In: Lefcourt H, editor.  
30 Advances and innovations in locus of control research. New York: Academic Press; 1980.
- 31 | (4439) Levenson H. Multidimensional locus of control in psychiatric patients. *Journal of  
32 Consulting and Clinical Psychology* 1973; 41(3):397-404.
- 33 | (40) ~~Smets E-MA, Garssen B, Bonke B, de Haes J-CJM. The Multidimensional Fatigue  
34 Inventory (MFI) psychometric qualities of an instrument to assess fatigue. *Journal of  
35 Psychosomatic Research* 1995; 39(3):315-325.~~
- 36 | (41) ~~Wagner D, Nisenbaum R, Heim C, Jones JF, Unger ER, Reeves WC. Psychometric  
37 properties of the CDC Symptom Inventory for assessment of Chronic Fatigue  
38 Syndrome. *Population Health Metrics* 2005; 3(8).~~
- 39 | (42) ~~Chalder T, Berelozit G, Pawlikowska T, Watts L, Wessely S, Wright D et al.  
40 Development of a fatigue scale. *Journal of Psychosomatic Research* 1993; 37:147-153.~~
- 41 | (453) Arroll MA, Howard A. The development of the Maladaptive Stress Index. 2012; in  
42 prep.
- 43  
44  
45  
46  
47  
48  
49  
50  
51  
52  
53  
54  
55  
56  
57  
58  
59  
60

1  
2  
3  
4  
5  
6  
7 | (464) Tabachnick BG, Fidell LS. Using multivariate statistics. 4th ed. Needham Heights,  
8 MA: Allyn & Bacon; 2001.

9  
10 | ~~(45) Arroll MA, Senior V. Individuals' Experience of Chronic Fatigue Syndrome/ Myalgic~~  
11 ~~Encephalomyelitis: An Interpretative Phenomenological Analysis. *Psychology and Health*~~  
12 ~~2008; 23:443-458.~~

13 | ~~(46) Kindon T. Reporting of Harms Associated with Graded Exercise Therapy and~~  
14 ~~Cognitive Behavioural Therapy in Myalgic Encephalomyelitis/Chronic Fatigue~~  
15 ~~Syndrome. *Bulletin of the International Association of CFS/ME* 2011; 19(2):59-111.~~

Table 1. Baseline comparisons of sample demographics and outcome variables

|                                    |            | Mean                    | SD     | 95% CI for Mean |        | Test statistic     | p-value |
|------------------------------------|------------|-------------------------|--------|-----------------|--------|--------------------|---------|
|                                    |            |                         |        | Lower           | Upper  |                    |         |
| Gender                             | Psychology | 9 (21.4%) <sup>d</sup>  |        |                 |        | .179 <sup>e</sup>  | .915    |
|                                    | Nutrition  | 8 (18.2%) <sup>d</sup>  |        |                 |        |                    |         |
|                                    | Combined   | 11 (21.2%) <sup>d</sup> |        |                 |        |                    |         |
|                                    | Total      | 28 (20.3%) <sup>d</sup> |        |                 |        |                    |         |
| Age                                | Psychology | 42.881                  | 13.986 | 38.523          | 47.239 | .000 <sup>a</sup>  | 1.000   |
|                                    | Nutrition  | 42.864                  | 12.504 | 39.062          | 46.665 |                    |         |
|                                    | Combined   | 42.843                  | 11.125 | 39.714          | 45.972 |                    |         |
|                                    | Total      | 42.861                  | 12.406 | 40.765          | 44.957 |                    |         |
| Illness duration                   | Psychology | 8.874                   | 8.252  | 6.302           | 11.445 | .252 <sup>a</sup>  | .778    |
|                                    | Nutrition  | 10.023                  | 7.375  | 7.781           | 12.265 |                    |         |
|                                    | Combined   | 9.625                   | 7.291  | 7.595           | 11.655 |                    |         |
|                                    | Total      | 9.523                   | 7.580  | 8.247           | 10.800 |                    |         |
| SF-36<br>Physical Functioning      | Psychology | 49.339                  | 22.698 | 42.266          | 56.413 | .319 <sup>a</sup>  | .727    |
|                                    | Nutrition  | 47.855                  | 26.226 | 39.882          | 55.829 |                    |         |
|                                    | Combined   | 45.299                  | 25.479 | 38.206          | 52.393 |                    |         |
|                                    | Total      | 47.344                  | 24.792 | 43.171          | 51.517 |                    |         |
| SF-36<br>Role limitations physical | Psychology | 7.143                   | 15.894 | 2.190           | 12.096 | .281 <sup>a</sup>  | .755    |
|                                    | Nutrition  | 7.574                   | 17.500 | 2.254           | 12.895 |                    |         |
|                                    | Combined   | 9.774                   | 21.051 | 3.914           | 15.635 |                    |         |
|                                    | Total      | 8.272                   | 18.387 | 5.177           | 11.367 |                    |         |
| SF-36                              | Psychology | 61.548                  | 25.614 | 53.566          | 69.530 | 1.002 <sup>a</sup> | .370    |

1  
2  
3  
4  
5  
6  
7  
8  
9  
10  
11  
12  
13  
14  
15  
16  
17  
18  
19  
20  
21  
22  
23  
24  
25  
26  
27  
28  
29  
30  
31  
32  
33  
34  
35  
36  
37  
38  
39  
40  
41  
42  
43  
44  
45  
46  
47  
48  
49

|                                     |            |        |         |        |        |                    |       |
|-------------------------------------|------------|--------|---------|--------|--------|--------------------|-------|
| Bodily pain                         | Nutrition  | 55.625 | 30.242  | 46.431 | 64.819 |                    |       |
|                                     | Combined   | 53.606 | 27.019  | 46.084 | 61.128 |                    |       |
|                                     | Total      | 56.667 | 27.683  | 52.007 | 61.327 |                    |       |
| SF-36                               | Psychology | 37.202 | 21.824  | 30.402 | 44.003 | -.536 <sup>a</sup> | -.586 |
| Social functioning                  | Nutrition  | 32.671 | 25.888  | 24.800 | 40.541 |                    |       |
|                                     | Combined   | 32.452 | 24.786  | 25.552 | 39.352 |                    |       |
|                                     | Total      | 33.967 | 24.212  | 29.892 | 38.043 |                    |       |
| SF-36<br>General mental health      | Psychology | 60.286 | 19.584  | 54.183 | 66.389 | -.124 <sup>a</sup> | -.884 |
|                                     | Nutrition  | 59.727 | 19.355  | 53.843 | 65.612 |                    |       |
|                                     | Combined   | 58.308 | 20.948  | 52.476 | 64.140 |                    |       |
|                                     | Total      | 59.362 | 19.911  | 56.011 | 62.714 |                    |       |
| SF-36<br>Role limitations emotional | Psychology | 55.554 | 46.368  | 41.104 | 70.004 | -.390 <sup>a</sup> | -.678 |
|                                     | Nutrition  | 48.482 | 47.390  | 34.074 | 62.890 |                    |       |
|                                     | Combined   | 47.780 | 43.924  | 35.551 | 60.008 |                    |       |
|                                     | Total      | 50.370 | 45.590  | 42.695 | 58.044 |                    |       |
| SF-36<br>Vitality Energy or Fatigue | Psychology | 20.714 | 16.1386 | 15.685 | 25.743 | -.129 <sup>a</sup> | -.879 |
|                                     | Nutrition  | 20.114 | 14.570  | 15.685 | 24.542 |                    |       |
|                                     | Combined   | 19.039 | 17.658  | 14.123 | 23.955 |                    |       |
|                                     | Total      | 19.891 | 16.159  | 17.171 | 22.611 |                    |       |
| SF-36<br>General health perceptions | Psychology | 37.024 | 17.945  | 31.432 | 42.616 | 2.769 <sup>a</sup> | -.066 |
|                                     | Nutrition  | 28.636 | 15.528  | 23.915 | 33.357 |                    |       |
|                                     | Combined   | 30.962 | 17.575  | 26.069 | 35.854 |                    |       |
|                                     | Total      | 32.065 | 17.286  | 29.156 | 34.975 |                    |       |
| MHLCs Internal                      | Psychology | -.677  | -.159   | -.627  | -.726  | 1.216 <sup>a</sup> | -.300 |
|                                     | Nutrition  | -.622  | -.177   | -.568  | -.675  |                    |       |

only

1  
2  
3  
4  
5  
6  
7  
8  
9  
10  
11  
12  
13  
14  
15  
16  
17  
18  
19  
20  
21  
22  
23  
24  
25  
26  
27  
28  
29  
30  
31  
32  
33  
34  
35  
36  
37  
38  
39  
40  
41  
42  
43  
44  
45  
46  
47  
48  
49

|                       |            |        |       |        |        |                    |                    |
|-----------------------|------------|--------|-------|--------|--------|--------------------|--------------------|
|                       | Combined   | -.662  | -.174 | -.613  | -.710  |                    |                    |
|                       | Total      | -.653  | -.171 | -.625  | -.682  |                    |                    |
| MHLCS-Chance          | Psychology | -.368  | -.156 | -.320  | -.417  | .395 <sup>a</sup>  | -.674              |
|                       | Nutrition  | -.340  | -.133 | -.299  | -.380  |                    |                    |
|                       | Combined   | -.354  | -.155 | -.311  | -.397  |                    |                    |
|                       | Total      | -.354  | -.148 | -.329  | -.379  |                    |                    |
| MHLCS-Powerful Others | Psychology | -.404  | -.134 | -.362  | -.446  | .119 <sup>a</sup>  | -.888              |
|                       | Nutrition  | -.417  | -.141 | -.374  | -.460  |                    |                    |
|                       | Combined   | -.407  | -.101 | -.379  | -.436  |                    |                    |
|                       | Total      | -.409  | -.124 | -.388  | -.430  |                    |                    |
| MHLCS-Doctors         | Psychology | -.169  | -.082 | -.143  | -.194  | .575 <sup>a</sup>  | -.564              |
|                       | Nutrition  | -.171  | -.089 | -.144  | -.197  |                    |                    |
|                       | Combined   | -.191  | -.147 | -.150  | -.232  |                    |                    |
|                       | Total      | -.178  | -.112 | -.159  | -.196  |                    |                    |
| MHLCS-Other People    | Psychology | -.235  | -.075 | -.212  | -.259  | 1.051 <sup>a</sup> | -.352              |
|                       | Nutrition  | -.264  | -.129 | -.225  | -.304  |                    |                    |
|                       | Combined   | -.245  | -.074 | -.224  | -.265  |                    |                    |
|                       | Total      | -.248  | -.095 | -.232  | -.264  |                    |                    |
| MFI-General Fatigue   | Psychology | 15.952 | 2.845 | 15.066 | 16.839 | 3.219 <sup>a</sup> | -.043 <sup>*</sup> |
|                       | Nutrition  | 16.977 | 2.601 | 16.186 | 17.768 |                    |                    |
|                       | Combined   | 17.327 | 2.587 | 16.607 | 18.047 |                    |                    |
|                       | Total      | 16.797 | 2.716 | 16.340 | 17.254 |                    |                    |
| MFI-Physical Fatigue  | Psychology | 15.929 | 3.331 | 14.891 | 16.966 | 3.343 <sup>a</sup> | -.038 <sup>*</sup> |
|                       | Nutrition  | 16.727 | 3.358 | 15.707 | 17.748 |                    |                    |
|                       | Combined   | 17.615 | 2.823 | 16.830 | 18.401 |                    |                    |

only

1  
2  
3  
4  
5  
6  
7  
8  
9  
10  
11  
12  
13  
14  
15  
16  
17  
18  
19  
20  
21  
22  
23  
24  
25  
26  
27  
28  
29  
30  
31  
32  
33  
34  
35  
36  
37  
38  
39  
40  
41  
42  
43  
44  
45  
46  
47  
48  
49

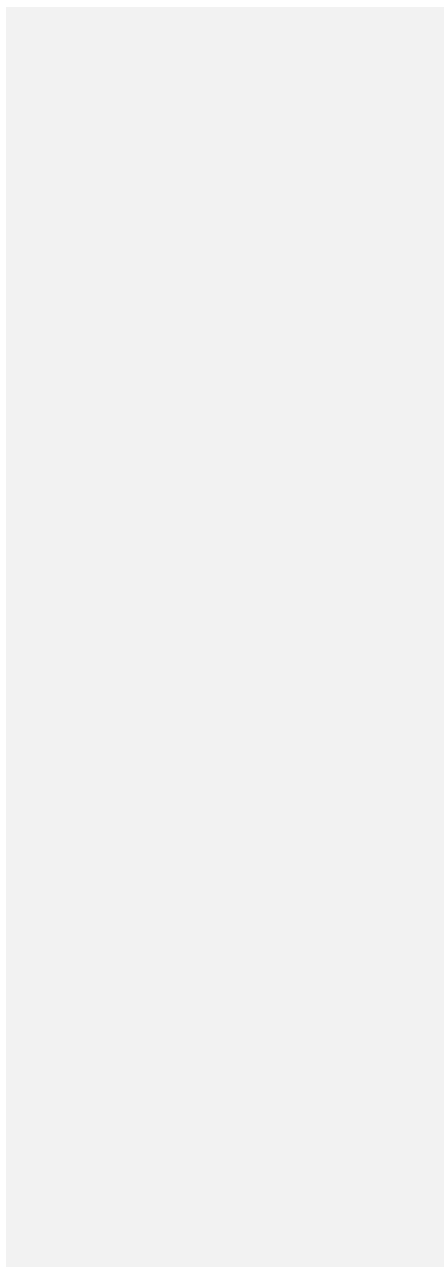

only

|                                       |            |        |       |        |        |                    |        |
|---------------------------------------|------------|--------|-------|--------|--------|--------------------|--------|
|                                       | Total      | 16.819 | 3.211 | 16.278 | 17.359 |                    |        |
| MFI                                   | Psychology | 13.857 | 4.112 | 12.576 | 15.138 | 1.030 <sup>a</sup> | -.360  |
| Reduced Activity                      | Nutrition  | 14.136 | 4.027 | 12.912 | 15.361 |                    |        |
|                                       | Combined   | 14.962 | 3.662 | 13.942 | 15.981 |                    |        |
|                                       | Total      | 14.362 | 3.921 | 13.702 | 15.022 |                    |        |
| MFI                                   | Psychology | 10.357 | 4.287 | 9.021  | 11.693 | 1.324 <sup>a</sup> | -.270  |
| Reduced Motivation                    | Nutrition  | 10.500 | 3.474 | 9.444  | 11.556 |                    |        |
|                                       | Combined   | 11.462 | 3.153 | 10.584 | 12.339 |                    |        |
|                                       | Total      | 10.819 | 3.639 | 10.206 | 11.431 |                    |        |
| MFI                                   | Psychology | 13.524 | 4.363 | 12.164 | 14.883 | .064 <sup>a</sup>  | -.938  |
| Mental Fatigue                        | Nutrition  | 13.682 | 4.328 | 12.366 | 14.998 |                    |        |
|                                       | Combined   | 13.846 | 4.345 | 12.637 | 15.056 |                    |        |
|                                       | Total      | 13.696 | 4.315 | 12.969 | 14.422 |                    |        |
| CDC-CFS                               | Psychology | 2.571  | 3.109 | 1.603  | 3.540  | 1.414 <sup>a</sup> | -.247  |
| Sore Throat                           | Nutrition  | 3.977  | 3.776 | 2.829  | 5.125  |                    |        |
|                                       | Combined   | 3.202  | 4.494 | 1.951  | 4.454  |                    |        |
|                                       | Total      | 3.257  | 3.898 | 2.601  | 3.914  |                    |        |
| CDC-CFS Swollen Lymph<br>nodes Glands | Psychology | 1.976  | 3.382 | .922   | 3.030  | 7.161 <sup>b</sup> | -.028* |
|                                       | Nutrition  | 5.561  | 6.491 | 3.587  | 7.534  |                    |        |
|                                       | Combined   | 3.462  | 4.881 | 2.103  | 4.820  |                    |        |
|                                       | Total      | 3.679  | 5.250 | 2.795  | 4.563  |                    |        |
| CDC-CFS                               | Psychology | 2.071  | 3.249 | 1.059  | 3.084  | .850 <sup>a</sup>  | -.430  |
| Diarrhoea/Diarrhea                    | Nutrition  | 2.841  | 4.832 | 1.372  | 4.310  |                    |        |
|                                       | Combined   | 3.135  | 3.773 | 2.084  | 4.185  |                    |        |
|                                       | Total      | 2.717  | 3.998 | 2.044  | 3.390  |                    |        |



|                                      |            |        |       |        |        |                    |       |
|--------------------------------------|------------|--------|-------|--------|--------|--------------------|-------|
| CDC-CFS Fatigue after exertion       | Psychology | 13.286 | 6.271 | 11.331 | 15.240 | .219 <sup>a</sup>  | -.803 |
|                                      | Nutrition  | 13.722 | 6.450 | 11.761 | 15.682 |                    |       |
|                                      | Combined   | 14.154 | 6.270 | 12.408 | 15.899 |                    |       |
|                                      | Total      | 13.752 | 6.292 | 12.693 | 14.811 |                    |       |
| CDC-CFS Muscle Aches or Muscle Pains | Psychology | 8.286  | 6.747 | 6.183  | 10.388 | -.166 <sup>a</sup> | -.847 |
|                                      | Nutrition  | 9.091  | 6.383 | 7.151  | 11.031 |                    |       |
|                                      | Combined   | 8.519  | 6.932 | 6.589  | 10.449 |                    |       |
|                                      | Total      | 8.630  | 6.664 | 7.509  | 9.752  |                    |       |
| CDC-CFS Pain In Joints               | Psychology | 3.476  | 5.334 | 1.814  | 5.138  | 1.373 <sup>a</sup> | -.257 |
|                                      | Nutrition  | 4.696  | 5.560 | 3.006  | 6.386  |                    |       |
|                                      | Combined   | 5.474  | 6.386 | 3.696  | 7.251  |                    |       |
|                                      | Total      | 4.618  | 5.837 | 3.635  | 5.600  |                    |       |
| CDC-CFS Fever                        | Psychology | 1.238  | 2.516 | -.454  | 2.022  | .027 <sup>a</sup>  | -.973 |
|                                      | Nutrition  | 1.394  | 2.562 | -.615  | 2.173  |                    |       |
|                                      | Combined   | 1.333  | 3.909 | -.245  | 2.421  |                    |       |
|                                      | Total      | 1.324  | 3.106 | -.801  | 1.846  |                    |       |
| CDC-CFS Chills                       | Psychology | 3.357  | 4.637 | 1.912  | 4.802  | -.206 <sup>a</sup> | -.814 |
|                                      | Nutrition  | 3.750  | 3.924 | 2.557  | 4.943  |                    |       |
|                                      | Combined   | 3.192  | 4.343 | 1.983  | 4.402  |                    |       |
|                                      | Total      | 3.420  | 4.283 | 2.699  | 4.141  |                    |       |
| CDC-CFS Unrefreshing Sleep           | Psychology | 12.905 | 6.792 | 10.788 | 15.021 | .150 <sup>a</sup>  | -.861 |
|                                      | Nutrition  | 12.250 | 7.088 | 10.095 | 14.405 |                    |       |
|                                      | Combined   | 12.154 | 7.147 | 10.164 | 14.144 |                    |       |
|                                      | Total      | 12.413 | 6.978 | 11.238 | 13.588 |                    |       |
| CDC-CFS Sleeping                     | Psychology | 9.286  | 7.658 | 6.899  | 11.672 | .085 <sup>a</sup>  | -.918 |

1  
2  
3  
4  
5  
6  
7  
8  
9  
10  
11  
12  
13  
14  
15  
16  
17  
18  
19  
20  
21  
22  
23  
24  
25  
26  
27  
28  
29  
30  
31  
32  
33  
34  
35  
36  
37  
38  
39  
40  
41  
42  
43  
44  
45  
46  
47  
48  
49

|                                  |            |       |       |        |        |                    |       |
|----------------------------------|------------|-------|-------|--------|--------|--------------------|-------|
| Problems                         | Nutrition  | 8.614 | 7.317 | 6.389  | 10.838 |                    |       |
|                                  | Combined   | 8.904 | 7.684 | 6.766  | 11.042 |                    |       |
|                                  | Total      | 8.928 | 7.509 | 7.664  | 10.192 |                    |       |
| CDC-CFS Headaches                | Psychology | 5.262 | 5.548 | 3.533  | 6.991  | 1.611 <sup>a</sup> | -.203 |
|                                  | Nutrition  | 7.646 | 7.040 | 5.506  | 9.786  |                    |       |
|                                  | Combined   | 6.346 | 5.857 | 4.715  | 7.977  |                    |       |
|                                  | Total      | 6.431 | 6.200 | 5.3871 | 7.474  |                    |       |
| CDC-CFS Memory Problems          | Psychology | 6.333 | 4.996 | 4.777  | 7.890  | 3.403 <sup>b</sup> | -.182 |
|                                  | Nutrition  | 9.409 | 7.183 | 7.225  | 11.593 |                    |       |
|                                  | Combined   | 8.173 | 7.610 | 6.055  | 10.292 |                    |       |
|                                  | Total      | 8.007 | 6.835 | 6.857  | 9.158  |                    |       |
| CDC-CFS Difficulty Concentrating | Psychology | 8.500 | 6.094 | 6.601  | 10.399 | .391 <sup>a</sup>  | -.677 |
|                                  | Nutrition  | 9.822 | 7.641 | 7.499  | 12.145 |                    |       |
|                                  | Combined   | 9.135 | 6.942 | 7.202  | 11.067 |                    |       |
|                                  | Total      | 9.161 | 6.903 | 7.999  | 10.323 |                    |       |
| CDC-CFS Nausea                   | Psychology | 3.476 | 4.845 | 1.966  | 4.986  | 1.162 <sup>a</sup> | -.316 |
|                                  | Nutrition  | 4.769 | 5.135 | 3.208  | 6.330  |                    |       |
|                                  | Combined   | 3.327 | 4.902 | 1.962  | 4.692  |                    |       |
|                                  | Total      | 3.832 | 4.966 | 2.996  | 4.668  |                    |       |
| CDC-CFS Abdominal Pain           | Psychology | 2.548 | 3.270 | 1.529  | 3.567  | 5.971 <sup>b</sup> | -.051 |
|                                  | Nutrition  | 5.064 | 5.165 | 3.493  | 6.634  |                    |       |
|                                  | Combined   | 3.750 | 4.635 | 2.460  | 5.041  |                    |       |
|                                  | Total      | 3.803 | 4.535 | 3.040  | 4.566  |                    |       |
| CDC-CFS Sinus Nasal Symptoms     | Psychology | 3.524 | 4.702 | 2.059  | 4.989  | 1.192 <sup>a</sup> | -.307 |
|                                  | Nutrition  | 5.469 | 6.476 | 3.500  | 7.438  |                    |       |

only

1  
2  
3  
4  
5  
6  
7  
8  
9  
10  
11  
12  
13  
14  
15  
16  
17  
18  
19  
20  
21  
22  
23  
24  
25  
26  
27  
28  
29  
30  
31  
32  
33  
34  
35  
36  
37  
38  
39  
40  
41  
42  
43  
44  
45  
46  
47  
48  
49

|                                                 |            |        |        |        |         |                   |      |
|-------------------------------------------------|------------|--------|--------|--------|---------|-------------------|------|
|                                                 | Combined   | 4.789  | 6.304  | 3.034  | 6.544   |                   |      |
|                                                 | Total      | 4.620  | 5.932  | 3.622  | 5.619   |                   |      |
| CDC-CFS Shortness Of<br>Breath                  | Psychology | 3.000  | 4.191  | 1.694  | 4.306   | .095 <sup>a</sup> | .909 |
|                                                 | Nutrition  | 3.285  | 4.090  | 2.026  | 4.543   |                   |      |
|                                                 | Combined   | 3.392  | 4.788  | 2.046  | 4.739   |                   |      |
|                                                 | Total      | 3.237  | 4.365  | 2.497  | 3.977   |                   |      |
| CDC-CFS Sensitivity To<br>Light                 | Psychology | 3.429  | 5.347  | 1.762  | 5.095   | .794 <sup>a</sup> | .454 |
|                                                 | Nutrition  | 5.031  | 6.097  | 3.177  | 6.884   |                   |      |
|                                                 | Combined   | 4.481  | 6.360  | 2.710  | 6.251   |                   |      |
|                                                 | Total      | 4.336  | 5.975  | 3.330  | 5.342   |                   |      |
| CDC-CFS Depression                              | Psychology | 3.952  | 3.938  | 2.725  | 5.180   | .160 <sup>b</sup> | .923 |
|                                                 | Nutrition  | 4.477  | 5.450  | 2.821  | 6.134   |                   |      |
|                                                 | Combined   | 5.077  | 5.950  | 3.420  | 6.734   |                   |      |
|                                                 | Total      | 4.544  | 5.231  | 3.663  | 5.424   |                   |      |
| CDC-CFS Maladaptive<br>Stress Index Scale Score | Psychology | 94.381 | 16.836 | 89.134 | 99.628  | .465 <sup>a</sup> | .629 |
|                                                 | Nutrition  | 96.386 | 21.946 | 89.714 | 103.059 |                   |      |
|                                                 | Combined   | 98.269 | 19.165 | 92.934 | 103.605 |                   |      |
|                                                 | Total      | 96.486 | 19.373 | 93.225 | 99.747  |                   |      |

<sup>a</sup>F-statistic for one-way analysis of variance, d.f.=2,134

<sup>b</sup>H-statistic for Kruskal-Wallis test, d.f.=2

<sup>c</sup> $\chi^2$ -statistic for comparison of nominal level data, d.f.=2

<sup>d</sup>number of males

\* test is significant at the  $p < .05$  level

only

Table 2. Outcome variable comparisons across time

|                           |            | Baseline |        |                 |        | 3-month follow-up |        |                 |        | Comparisons |         |
|---------------------------|------------|----------|--------|-----------------|--------|-------------------|--------|-----------------|--------|-------------|---------|
|                           |            | Mean     | SD     | 95% CI for Mean |        | Mean              | SD     | 95% CI for Mean |        | z-statistic | p-value |
|                           |            |          |        | Lower           | Upper  |                   |        | Lower           | Upper  |             |         |
| SF-36                     | Psychology | 49.339   | 22.698 | 42.266          | 56.413 | 59.267            | 30.346 | 41.745          | 76.788 | -2.707      | .007**  |
| Physical Functioning      | Nutrition  | 47.855   | 26.226 | 39.882          | 55.829 | 46.706            | 30.744 | 34.544          | 58.868 | -1.136      | .256    |
|                           | Combined   | 45.299   | 25.479 | 38.206          | 52.393 | 49.288            | 26.403 | 39.604          | 58.973 | -1.850      | .064    |
|                           | Total      | 47.344   | 24.791 | 43.171          | 51.517 | 50.260            | 28.818 | 43.488          | 57.032 | -3.120      | .002**  |
| SF-36                     | Psychology | 7.143    | 15.894 | 2.190           | 12.096 | 46.429            | 39.048 | 23.883          | 68.974 | -2.379      | .017*   |
| Role limitations physical | Nutrition  | 7.574    | 17.500 | 2.254           | 12.895 | 19.444            | 20.016 | 11.526          | 27.363 | -2.907      | .004**  |
|                           | Combined   | 9.774    | 21.051 | 3.914           | 15.635 | 22.742            | 25.161 | 13.513          | 31.971 | -2.225      | .026*   |
|                           | Total      | 8.272    | 18.387 | 5.177           | 11.367 | 26.111            | 28.225 | 19.479          | 32.744 | -4.354      | .001*** |
| SF-36                     | Psychology | 61.548   | 25.614 | 53.566          | 69.530 | 63.929            | 29.786 | 46.731          | 81.127 | -1.196      | .232    |
| Bodily pain               | Nutrition  | 55.625   | 30.242 | 46.434          | 64.819 | 58.889            | 32.943 | 45.857          | 71.921 | -1.800      | .072    |
|                           | Combined   | 53.606   | 27.019 | 46.084          | 61.128 | 58.629            | 27.301 | 48.615          | 68.643 | -1.048      | .294    |
|                           | Total      | 56.667   | 27.683 | 52.007          | 61.327 | 59.757            | 29.649 | 52.790          | 66.724 | -2.240      | .025*   |
| SF-36                     | Psychology | 37.202   | 21.824 | 30.402          | 44.003 | 59.821            | 33.318 | 40.584          | 79.058 | -2.689      | .007**  |
| Social functioning        | Nutrition  | 32.671   | 25.888 | 24.800          | 40.541 | 43.519            | 33.679 | 30.196          | 56.841 | -2.476      | .013*   |
|                           | Combined   | 32.452   | 24.786 | 25.551          | 39.352 | 41.936            | 28.604 | 31.443          | 52.428 | -2.426      | .015*   |
|                           | Total      | 33.967   | 24.212 | 29.892          | 38.043 | 46.007            | 31.805 | 38.533          | 53.481 | -4.504      | .001*** |
| SF-36                     | Psychology | 60.286   | 19.584 | 54.183          | 66.389 | 74.571            | 13.276 | 66.906          | 82.237 | -2.497      | .013*   |
| General mental health     | Nutrition  | 59.727   | 19.355 | 53.843          | 65.612 | 64.741            | 20.548 | 56.612          | 72.869 | -1.696      | .090    |
|                           | Combined   | 58.308   | 20.948 | 52.476          | 64.140 | 64.129            | 16.637 | 58.027          | 70.232 | -.524       | .600    |

1  
2  
3  
4  
5  
6  
7  
8  
9  
10  
11  
12  
13  
14  
15  
16  
17  
18  
19  
20  
21  
22  
23  
24  
25  
26  
27  
28  
29  
30  
31  
32  
33  
34  
35  
36  
37  
38  
39  
40  
41  
42  
43  
44  
45  
46  
47  
48  
49

|                 |            |        |         |        |        |        |        |        |        |        |         |
|-----------------|------------|--------|---------|--------|--------|--------|--------|--------|--------|--------|---------|
|                 | Total      | 59.362 | 19.911  | 56.011 | 62.714 | 66.389 | 17.897 | 62.183 | 70.594 | -2.665 | .008**  |
| SF-36           | Psychology | 55.554 | 46.368  | 41.105 | 70.004 | 76.191 | 33.150 | 57.051 | 95.331 | -.842  | .400    |
| Role            | Nutrition  | 48.482 | 47.390  | 34.074 | 62.890 | 55.594 | 38.130 | 40.510 | 70.678 | -1.788 | .074    |
| limitations     | Combined   | 47.780 | 43.924  | 35.551 | 60.008 | 67.742 | 32.756 | 55.727 | 79.757 | -2.313 | .021*   |
| emotional       | Total      | 50.370 | 45.590  | 42.695 | 58.044 | 64.829 | 35.335 | 56.526 | 73.133 | -3.159 | .002**  |
| SF-36           | Psychology | 20.714 | 16.139  | 15.685 | 25.743 | 41.071 | 20.586 | 29.186 | 52.957 | -3.066 | .002**  |
| Vitality-Energy | Nutrition  | 20.114 | 14.5670 | 15.685 | 24.542 | 31.111 | 23.588 | 21.780 | 40.442 | -2.734 | .006**  |
| or-Fatigue      | Combined   | 19.039 | 17.658  | 14.123 | 23.955 | 27.097 | 19.527 | 19.934 | 34.259 | -1.558 | .119    |
|                 | Total      | 19.891 | 16.159  | 17.171 | 22.611 | 31.319 | 21.657 | 26.230 | 36.409 | -4.205 | .001*** |
| SF-36           | Psychology | 37.024 | 17.945  | 31.432 | 42.616 | 45.714 | 21.109 | 33.526 | 57.903 | -2.561 | .010*   |
| General health  | Nutrition  | 28.636 | 15.528  | 23.915 | 33.357 | 36.482 | 18.903 | 29.004 | 43.959 | -2.157 | .031*   |
| perceptions     | Combined   | 30.962 | 17.575  | 26.069 | 35.854 | 42.097 | 21.632 | 34.162 | 50.032 | -2.423 | .015*   |
|                 | Total      | 32.065 | 17.286  | 29.156 | 34.975 | 40.694 | 20.561 | 35.863 | 45.526 | -3.996 | .001*** |
| MHLCS           | Psychology | -.677  | -.159   | -.627  | -.726  | -.821  | -.251  | -.676  | -.966  | -2.983 | .003**  |
| Internal        | Nutrition  | -.622  | -.177   | -.568  | -.675  | -.193  | 2.969  | -.019  | 2.368  | -.687  | .492    |
|                 | Combined   | -.662  | -.174   | -.613  | -.710  | -.779  | -.318  | -.662  | -.896  | -1.755 | .079    |
|                 | Total      | -.653  | -.171   | -.624  | -.682  | -.942  | 1.822  | -.514  | 1.371  | -2.962 | .003**  |
| MHLCS           | Psychology | -.368  | -.156   | -.320  | -.417  | -.351  | -.152  | -.263  | -.439  | -2.594 | .009**  |
| Chance          | Nutrition  | -.340  | -.133   | -.299  | -.380  | -.911  | 3.020  | -.284  | 2.105  | -.143  | .886    |
|                 | Combined   | -.354  | -.155   | -.311  | -.397  | -.314  | -.133  | -.265  | -.363  | -.672  | .501    |
|                 | Total      | -.354  | -.148   | -.329  | -.379  | -.545  | 1.853  | -.109  | .980   | -1.552 | .121    |
| MHLCS           | Psychology | -.404  | -.134   | -.362  | -.446  | -.441  | -.315  | -.259  | -.624  | -.000  | 1.000   |
| Powerful        | Nutrition  | -.418  | -.141   | -.374  | -.460  | -.804  | 2.244  | -.084  | 1.691  | -1.843 | .065    |
| Others          | Combined   | -.407  | -.101   | -.379  | -.436  | -.434  | -.279  | -.331  | -.536  | -.577  | .564    |
|                 | Total      | -.409  | -.124   | -.388  | -.430  | -.574  | 1.3880 | -.248  | .900   | -1.601 | .109    |

|              |            |        |       |        |        |        |       |        |        |        |          |
|--------------|------------|--------|-------|--------|--------|--------|-------|--------|--------|--------|----------|
| MHLCS        | Psychology | -.169  | -.082 | -.143  | -.194  | -.131  | -.093 | -.077  | -.185  | -.122  | -.262    |
| Doctors      | Nutrition  | -.171  | -.089 | -.144  | -.197  | -.657  | 2.668 | -.398  | 1.713  | -.686  | -.092    |
|              | Combined   | -.191  | -.147 | -.150  | -.232  | -.153  | -.070 | -.128  | -.179  | -.1384 | -.166    |
|              | Total      | -.178  | -.112 | -.159  | -.196  | -.338  | 1.635 | -.0462 | -.722  | -.2381 | -.017*   |
| MHLCS        | Psychology | -.235  | -.075 | -.212  | -.259  | -.268  | -.189 | -.159  | -.377  | -.118  | -.906    |
| Other People | Nutrition  | -.264  | -.129 | -.225  | -.304  | -.739  | 2.652 | -.311  | 1.788  | -.697  | -.090    |
|              | Combined   | -.245  | -.074 | -.224  | -.265  | -.252  | -.118 | -.209  | -.295  | -.213  | -.831    |
|              | Total      | -.248  | -.095 | -.232  | -.264  | -.438  | 1.626 | -.055  | -.820  | -.1186 | -.236    |
| MFI          | Psychology | 15.952 | 2.845 | 15.066 | 16.839 | 13.786 | 4.441 | 11.222 | 16.350 | -2.657 | -.008**  |
| General      | Nutrition  | 16.977 | 2.601 | 16.186 | 17.768 | 14.704 | 4.898 | 12.766 | 16.641 | -2.548 | -.011*   |
| Fatigue      | Combined   | 17.327 | 2.588 | 16.607 | 18.047 | 16.645 | 2.811 | 15.614 | 17.676 | -.854  | -.393    |
|              | Total      | 16.797 | 2.716 | 16.340 | 17.254 | 15.361 | 4.136 | 14.389 | 16.333 | -3.692 | -.001*** |
| MFI          | Psychology | 15.929 | 3.331 | 14.891 | 16.966 | 13.071 | 4.632 | 10.397 | 15.746 | -2.810 | -.005**  |
| Physical     | Nutrition  | 16.727 | 3.358 | 15.707 | 17.748 | 14.222 | 4.987 | 12.249 | 16.195 | -2.791 | -.005**  |
| Fatigue      | Combined   | 17.615 | 2.823 | 16.830 | 18.401 | 16.484 | 3.395 | 15.239 | 17.729 | -2.364 | -.018*   |
|              | Total      | 16.819 | 3.211 | 16.278 | 17.359 | 14.972 | 4.453 | 13.926 | 16.019 | -4.591 | -.001*** |
| MFI          | Psychology | 13.857 | 4.112 | 12.576 | 15.138 | 10.643 | 5.153 | 7.668  | 13.618 | -2.142 | -.032*   |
| Reduced      | Nutrition  | 14.136 | 4.027 | 12.912 | 15.361 | 12.259 | 5.012 | 10.277 | 14.242 | -2.164 | -.030*   |
| Activity     | Combined   | 14.962 | 3.662 | 13.942 | 15.981 | 14.936 | 3.777 | 13.550 | 16.321 | -.070  | -.944    |
|              | Total      | 14.362 | 3.921 | 13.702 | 15.022 | 13.097 | 4.798 | 11.970 | 14.225 | -2.421 | -.015*   |
| MFI          | Psychology | 10.357 | 4.287 | 9.021  | 11.693 | 7.286  | 4.214 | 4.853  | 9.719  | -2.131 | -.033*   |
| Reduced      | Nutrition  | 10.500 | 3.474 | 9.444  | 11.556 | 8.963  | 3.736 | 7.485  | 10.441 | -1.985 | -.047*   |
| Motivation   | Combined   | 11.462 | 3.153 | 10.584 | 12.339 | 10.774 | 3.095 | 9.639  | 11.910 | -1.082 | -.279    |
|              | Total      | 10.819 | 3.639 | 10.206 | 11.431 | 9.417  | 3.767 | 8.532  | 10.302 | -2.986 | -.003**  |
| MFI          | Psychology | 13.524 | 4.363 | 12.164 | 14.883 | 10.500 | 4.468 | 7.920  | 13.080 | -2.950 | -.003*   |

1  
2  
3  
4  
5  
6  
7  
8  
9  
10  
11  
12  
13  
14  
15  
16  
17  
18  
19  
20  
21  
22  
23  
24  
25  
26  
27  
28  
29  
30  
31  
32  
33  
34  
35  
36  
37  
38  
39  
40  
41  
42  
43  
44  
45  
46  
47  
48  
49

|                              |            |        |       |        |        |        |       |        |        |        |         |
|------------------------------|------------|--------|-------|--------|--------|--------|-------|--------|--------|--------|---------|
| Mental-Fatigue               | Nutrition  | 13.682 | 4.328 | 12.366 | 14.998 | 11.926 | 5.334 | 9.816  | 14.036 | -2.082 | .037*   |
|                              | Combined   | 13.846 | 4.345 | 12.637 | 15.056 | 12.613 | 3.827 | 11.209 | 14.017 | -1.586 | .113    |
|                              | Total      | 13.696 | 4.315 | 12.969 | 14.422 | 11.944 | 4.568 | 10.871 | 13.018 | -3.661 | .001*** |
| CDC-CFS                      | Psychology | 2.571  | 3.109 | 1.603  | 3.540  | 1.429  | 2.278 | .114   | 2.744  | -1.365 | .172    |
| Sore-Throat                  | Nutrition  | 3.977  | 3.776 | 2.829  | 5.125  | 1.741  | 2.087 | .915   | 2.566  | -2.211 | .027*   |
|                              | Combined   | 3.202  | 4.494 | 1.951  | 4.454  | 1.904  | 2.821 | .870   | 2.939  | -.804  | .422    |
|                              | Total      | 3.257  | 3.898 | 2.601  | 3.914  | 1.750  | 2.437 | 1.178  | 2.323  | -2.387 | .017*   |
| CDC-CFS                      | Psychology | 1.976  | 3.382 | .922   | 3.030  | 1.786  | 3.378 | -.165  | 3.736  | -.341  | .733    |
| Swollen Lymph-nodes Glands   | Nutrition  | 5.561  | 6.491 | 3.587  | 7.534  | 5.000  | 6.760 | 2.326  | 7.674  | -2.212 | .027*   |
|                              | Combined   | 3.462  | 4.881 | 2.103  | 4.820  | 2.690  | 4.477 | 1.0458 | 4.332  | -.725  | .468    |
|                              | Total      | 3.679  | 5.250 | 2.795  | 4.563  | 3.380  | 5.385 | 2.115  | 4.646  | -1.684 | .092    |
| CDC-CFS                      | Psychology | 2.071  | 3.249 | 1.059  | 3.084  | 1.643  | 2.818 | .016   | 3.270  | -.730  | .465    |
| DiarrhoeaDiarrhea            | Nutrition  | 2.841  | 4.832 | 1.372  | 4.310  | 1.444  | 3.274 | .149   | 2.740  | -1.649 | .099    |
|                              | Combined   | 3.135  | 3.773 | 2.084  | 4.185  | 1.631  | 2.483 | .720   | 2.542  | -1.996 | .046*   |
|                              | Total      | 2.717  | 3.998 | 2.044  | 3.390  | 1.563  | 2.827 | -.899  | 2.228  | -2.481 | .013*   |
| CDC-CFS                      | Psychology | 13.286 | 6.271 | 11.331 | 15.240 | 11.071 | 6.673 | 7.218  | 14.925 | -1.550 | .121    |
| Fatigue after exertion       | Nutrition  | 13.722 | 6.450 | 11.761 | 15.682 | 11.815 | 7.217 | 8.960  | 14.670 | -2.209 | .027*   |
|                              | Combined   | 14.154 | 6.270 | 12.408 | 15.899 | 11.436 | 6.275 | 9.134  | 13.738 | -2.392 | .017*   |
|                              | Total      | 13.752 | 6.292 | 12.693 | 14.811 | 11.507 | 6.629 | 9.949  | 13.065 | -3.574 | .001*** |
| CDC-CFS                      | Psychology | 8.286  | 6.747 | 6.183  | 10.388 | 7.429  | 6.892 | 3.450  | 11.408 | -2.145 | .032*   |
| Muscle-Aches or-Muscle Pains | Nutrition  | 9.091  | 6.383 | 7.151  | 11.031 | 7.222  | 6.278 | 4.739  | 9.706  | -2.901 | .004**  |
|                              | Combined   | 8.519  | 6.932 | 6.589  | 10.449 | 6.188  | 5.528 | 4.160  | 8.215  | -1.908 | .056    |
|                              | Total      | 8.630  | 6.664 | 7.509  | 9.752  | 6.817  | 6.029 | 5.400  | 8.234  | -3.995 | .001*** |
| CDC-CFS                      | Psychology | 3.476  | 5.334 | 1.814  | 5.138  | 2.786  | 4.458 | .212   | 5.360  | -1.778 | .075    |
| Pain-In-Joints               | Nutrition  | 4.696  | 5.560 | 3.006  | 6.386  | 3.926  | 5.099 | 1.909  | 5.943  | -2.022 | .043*   |

|              |            |        |       |        |        |        |       |        |        |        |         |
|--------------|------------|--------|-------|--------|--------|--------|-------|--------|--------|--------|---------|
|              | Combined   | 5.474  | 6.386 | 3.696  | 7.251  | 3.010  | 4.140 | 1.492  | 4.528  | -1.840 | .066    |
|              | Total      | 4.618  | 5.837 | 3.635  | 5.600  | 3.310  | 4.543 | 2.242  | 4.377  | -3.141 | .002**  |
| CDC-CFS      | Psychology | 1.238  | 2.516 | .454   | 2.022  | 1.643  | 4.181 | -.771  | 4.057  | -.135  | .892    |
| Fever        | Nutrition  | 1.394  | 2.562 | -.615  | 2.173  | -.630  | 2.041 | -.178  | 1.437  | -1.487 | -.137   |
|              | Combined   | 1.333  | 3.909 | -.245  | 2.421  | -.378  | .709  | -.118  | .638   | -1.517 | -.129   |
|              | Total      | 1.324  | 3.106 | -.801  | 1.846  | -.718  | 2.272 | -.185  | 1.252  | -1.876 | -.061   |
| CDC-CFS      | Psychology | 3.357  | 4.637 | 1.912  | 4.802  | 2.571  | 4.398 | .032   | 5.111  | -1.970 | .049*   |
| Chills       | Nutrition  | 3.750  | 3.924 | 2.557  | 4.943  | 2.222  | 4.098 | -.601  | 3.843  | -3.401 | .001*** |
|              | Combined   | 3.192  | 4.343 | 1.983  | 4.402  | 1.908  | 2.797 | -.882  | 2.934  | -2.049 | .040*   |
|              | Total      | 3.420  | 4.283 | 2.699  | 4.141  | 2.155  | 3.614 | -1.306 | 3.004  | -4.206 | .001*** |
| CDC-CFS      | Psychology | 12.905 | 6.792 | 10.788 | 15.021 | 10.643 | 6.698 | 6.776  | 14.510 | -.802  | .422    |
| Unrefreshing | Nutrition  | 12.250 | 7.088 | 10.095 | 14.405 | 9.444  | 7.738 | 6.384  | 12.505 | -1.421 | .155    |
| Sleep        | Combined   | 12.154 | 7.147 | 10.164 | 14.143 | 10.161 | 7.959 | 7.242  | 13.080 | -1.513 | .130    |
|              | Total      | 12.413 | 6.978 | 11.238 | 13.588 | 9.986  | 7.557 | 8.210  | 11.762 | -2.295 | .022*   |
| CDC-CFS      | Psychology | 9.286  | 7.658 | 6.899  | 11.672 | 5.286  | 4.921 | 2.444  | 8.127  | -1.738 | .082    |
| Sleeping     | Nutrition  | 8.614  | 7.317 | 6.389  | 10.838 | 9.482  | 9.200 | 5.842  | 13.121 | -.190  | .849    |
| Problems     | Combined   | 8.904  | 7.681 | 6.766  | 11.042 | 6.529  | 6.749 | 4.053  | 9.004  | -1.794 | .073    |
|              | Total      | 8.928  | 7.509 | 7.664  | 10.192 | 7.394  | 7.585 | 5.612  | 9.177  | -1.983 | .047*   |
| CDC-CFS      | Psychology | 5.262  | 5.548 | 3.533  | 6.991  | 4.357  | 3.411 | 2.388  | 6.326  | -1.200 | .230    |
| Headaches    | Nutrition  | 7.646  | 7.040 | 5.506  | 9.786  | 5.185  | 6.294 | 2.695  | 7.675  | -2.084 | .037*   |
|              | Combined   | 6.346  | 5.857 | 4.715  | 7.977  | 4.050  | 3.527 | 2.756  | 5.343  | -2.807 | .005**  |
|              | Total      | 6.431  | 6.200 | 5.387  | 7.474  | 4.535  | 4.708 | 3.429  | 5.642  | -3.000 | .003**  |
| CDC-CFS      | Psychology | 6.333  | 4.996 | 4.777  | 7.890  | 3.500  | 3.995 | 1.193  | 5.807  | -1.965 | .049*   |
| Memory       | Nutrition  | 9.409  | 7.183 | 7.225  | 11.593 | 8.667  | 7.681 | 5.628  | 11.705 | -.338  | .735    |
| Problems     | Combined   | 8.173  | 7.610 | 6.055  | 10.292 | 6.148  | 4.905 | 4.349  | 7.947  | -1.446 | .148    |



1  
2  
3  
4  
5  
6  
7  
8  
9  
10  
11  
12  
13  
14  
15  
16  
17  
18  
19  
20  
21  
22  
23  
24  
25  
26  
27  
28  
29  
30  
31  
32  
33  
34  
35  
36  
37  
38  
39  
40  
41  
42  
43  
44  
45  
46  
47  
48  
49

|                |            |       |       |       |        |       |       |       |        |        |         |
|----------------|------------|-------|-------|-------|--------|-------|-------|-------|--------|--------|---------|
|                | Total      | 8.007 | 6.835 | 6.857 | 9.158  | 6.578 | 6.189 | 5.123 | 8.032  | -2.053 | .040*   |
| CDC-CFS        | Psychology | 8.500 | 6.094 | 6.601 | 10.399 | 5.143 | 5.559 | 1.933 | 8.353  | -2.809 | .005**  |
| Difficulty     | Nutrition  | 9.822 | 7.641 | 7.499 | 12.145 | 7.778 | 6.941 | 5.032 | 10.524 | -1.196 | .232    |
| Concentrating  | Combined   | 9.135 | 6.942 | 7.202 | 11.067 | 6.507 | 4.843 | 4.731 | 8.283  | -1.899 | .058    |
|                | Total      | 9.161 | 6.903 | 7.999 | 10.323 | 6.718 | 5.844 | 5.345 | 8.092  | -3.440 | .001*** |
| CDC-CFS        | Psychology | 3.476 | 4.845 | 1.966 | 4.986  | 2.286 | 2.946 | .585  | 3.987  | -.213  | .832    |
| Nausea         | Nutrition  | 4.769 | 5.135 | 3.208 | 6.330  | 3.407 | 5.746 | 1.134 | 5.681  | -1.686 | .092    |
|                | Combined   | 3.327 | 4.902 | 1.962 | 4.692  | 3.458 | 3.585 | 2.144 | 4.773  | -.855  | .392    |
|                | Total      | 3.832 | 4.966 | 2.996 | 4.668  | 3.211 | 4.396 | 2.178 | 4.244  | -.584  | .559    |
| CDC-CFS        | Psychology | 2.548 | 3.270 | 1.529 | 3.567  | 2.786 | 4.003 | -.474 | 5.097  | -.343  | .732    |
| Abdominal      | Nutrition  | 5.064 | 5.165 | 3.493 | 6.634  | 3.593 | 3.905 | 2.048 | 5.137  | -1.968 | .049*   |
| Pain           | Combined   | 3.750 | 4.635 | 2.460 | 5.041  | 2.548 | 2.791 | 1.524 | 3.572  | -.598  | .550    |
|                | Total      | 3.803 | 4.535 | 3.040 | 4.566  | 2.986 | 3.470 | 2.171 | 3.801  | -1.727 | .084    |
| CDC-CFS        | Psychology | 3.524 | 4.702 | 2.059 | 4.989  | 2.357 | 2.437 | .950  | 3.764  | -.724  | .469    |
| Sinus-Nasal    | Nutrition  | 5.469 | 6.476 | 3.500 | 7.438  | 4.889 | 6.104 | 2.474 | 7.304  | -1.400 | .162    |
| Symptoms       | Combined   | 4.789 | 6.304 | 3.034 | 6.544  | 3.804 | 6.710 | 1.343 | 6.266  | -2.482 | .013*   |
|                | Total      | 4.620 | 5.931 | 3.622 | 5.619  | 3.930 | 5.882 | 2.547 | 5.312  | -2.971 | .003**  |
| CDC-CFS        | Psychology | 3.000 | 4.191 | 1.694 | 4.306  | 1.571 | 2.209 | .296  | 2.847  | -1.556 | .120    |
| Shortness-Of   | Nutrition  | 3.285 | 4.090 | 2.026 | 4.543  | 2.407 | 4.060 | .801  | 4.013  | -1.849 | .064    |
| Breath         | Combined   | 3.392 | 4.788 | 2.046 | 4.739  | 2.526 | 3.631 | 1.194 | 3.858  | -.976  | .329    |
|                | Total      | 3.237 | 4.365 | 2.497 | 3.977  | 2.296 | 3.554 | 1.461 | 3.131  | -2.538 | .011*   |
| CDC-CFS        | Psychology | 3.429 | 5.347 | 1.762 | 5.095  | 1.214 | 2.517 | -.239 | 2.668  | -1.973 | .049*   |
| Sensitivity-To | Nutrition  | 5.031 | 6.097 | 3.177 | 6.884  | 4.111 | 6.198 | 1.659 | 6.563  | -2.136 | .033*   |
| Light          | Combined   | 4.481 | 6.360 | 2.710 | 6.251  | 3.297 | 5.557 | 1.259 | 5.335  | -.787  | .431    |
|                | Total      | 4.336 | 5.975 | 3.330 | 5.342  | 3.197 | 5.419 | 1.924 | 4.471  | -2.542 | .011*   |

1  
2  
3  
4  
5  
6  
7  
8  
9  
10  
11  
12  
13  
14  
15  
16  
17  
18  
19  
20  
21  
22  
23  
24  
25  
26  
27  
28  
29  
30  
31  
32  
33  
34  
35  
36  
37  
38  
39  
40  
41  
42  
43  
44  
45  
46  
47  
48  
49

|              |            |        |        |        |         |        |        |        |        |        |         |
|--------------|------------|--------|--------|--------|---------|--------|--------|--------|--------|--------|---------|
| CDC-CFS      | Psychology | 3.952  | 3.938  | 2.725  | 5.180   | 1.571  | 3.228  | -.292  | 3.435  | -1.614 | -.106   |
| Depression   | Nutrition  | 4.477  | 5.450  | 2.821  | 6.134   | 3.333  | 4.883  | 1.402  | 5.265  | -1.584 | -.113   |
|              | Combined   | 5.077  | 5.950  | 3.420  | 6.734   | 2.766  | 3.324  | 1.547  | 3.985  | -1.304 | -.192   |
|              | Total      | 4.544  | 5.230  | 3.663  | 5.424   | 2.747  | 3.964  | 1.815  | 3.678  | -2.297 | .022*   |
| CDC-CFS      | Psychology | 94.381 | 16.836 | 89.134 | 99.628  | 78.571 | 18.434 | 67.928 | 89.215 | -3.111 | .002**  |
| Maladaptive  | Nutrition  | 96.386 | 21.946 | 89.714 | 103.059 | 85.259 | 27.665 | 74.315 | 96.203 | -3.443 | .001*** |
| Stress-Index | Combined   | 98.269 | 19.165 | 92.934 | 103.605 | 87.484 | 22.965 | 79.060 | 95.908 | -2.215 | .027*   |
| Scale-Score  | Total      | 96.486 | 19.373 | 93.225 | 99.747  | 84.917 | 24.004 | 79.276 | 90.557 | -5.123 | .001*** |

\*z-statistic for Wilcoxon Signed-Rank Test

Table 3. Change score comparisons between intervention groups

|                               |            | % change over time for sig. results <sup>a</sup> | Mean    | Std. Deviation | Std. Error | 95% CI for Mean |         | H <sup>b</sup> | p-value |
|-------------------------------|------------|--------------------------------------------------|---------|----------------|------------|-----------------|---------|----------------|---------|
|                               |            |                                                  |         |                |            | Lower           | Upper   |                |         |
| SF-36<br>Physical Functioning | Psychology | 16.75                                            | -13.629 | 14.990         | 4.006      | -22.285         | -4.974  | 3.215          | .200    |
|                               | Nutrition  |                                                  | -.407   | 19.967         | 3.843      | -8.306          | 7.492   |                |         |
|                               | Combined   |                                                  | -6.813  | 18.242         | 3.276      | -13.505         | -.122   |                |         |
|                               | Total      | 5.80                                             | -5.736  | 18.744         | 2.209      | -10.141         | -1.332  |                |         |
| SF-36                         | Psychology | 84.61                                            | -33.929 | 39.960         | 10.680     | -57.001         | -10.856 | 1.558          | .459    |

1  
2  
3  
4  
5  
6  
7  
8  
9  
10  
11  
12  
13  
14  
15  
16  
17  
18  
19  
20  
21  
22  
23  
24  
25  
26  
27  
28  
29  
30  
31  
32  
33  
34  
35  
36  
37  
38  
39  
40  
41  
42  
43  
44  
45  
46  
47  
48  
49

|                            |            |       |         |        |        |         |         |       |       |
|----------------------------|------------|-------|---------|--------|--------|---------|---------|-------|-------|
| Role limitations physical  | Nutrition  | 61.05 | -14.509 | 21.005 | 4.042  | -22.818 | -6.199  |       |       |
|                            | Combined   | 57.02 | -13.871 | 31.457 | 5.650  | -25.409 | -2.333  |       |       |
|                            | Total      | 63.32 | -18.010 | 30.564 | 3.602  | -25.192 | -10.828 |       |       |
| SF-36                      | Psychology |       | -6.071  | 15.588 | 4.166  | -15.072 | 2.929   | .163  | -.922 |
| Bodily pain                | Nutrition  |       | -6.574  | 18.800 | 3.618  | -14.011 | .863    |       |       |
|                            | Combined   |       | -3.387  | 25.532 | 4.586  | -12.752 | 5.978   |       |       |
|                            | Total      | 5.17  | -5.104  | 21.252 | 2.505  | -10.098 | -1.10   |       |       |
| SF-36                      | Psychology | 37.81 | -24.107 | 24.741 | 6.612  | -38.392 | -9.822  | 3.301 | -.192 |
| Social functioning         | Nutrition  | 24.93 | -10.648 | 20.423 | 3.931  | -18.727 | -2.569  |       |       |
|                            | Combined   | 22.60 | -11.290 | 24.013 | 4.313  | -20.098 | -2.482  |       |       |
|                            | Total      | 26.17 | -13.542 | 23.149 | 2.728  | -18.981 | -8.102  |       |       |
| SF-36                      | Psychology | 19.15 | -12.000 | 14.294 | 3.820  | -20.253 | -3.747  | 4.404 | -.111 |
| General mental health      | Nutrition  |       | -3.259  | 15.963 | 3.072  | -9.574  | 3.056   |       |       |
|                            | Combined   |       | -.645   | 16.911 | 3.037  | -6.848  | 5.558   |       |       |
|                            | Total      | 10.58 | -3.833  | 16.409 | 1.934  | -7.689  | -.022   |       |       |
| SF-36                      | Psychology |       | -9.527  | 49.664 | 13.273 | -38.202 | 19.148  | -.573 | -.751 |
| Role limitations emotional | Nutrition  |       | -18.561 | 55.759 | 10.731 | -40.618 | 3.497   |       |       |
|                            | Combined   | 29.47 | -18.284 | 52.240 | 9.383  | -37.446 | .878    |       |       |
|                            | Total      | 10.58 | -16.685 | 52.496 | 6.187  | -29.021 | -4.349  |       |       |
| SF-36                      | Psychology | 49.57 | -17.500 | 15.902 | 4.250  | -26.682 | -8.318  | 4.988 | -.083 |
| Vitality Energy or Fatigue | Nutrition  | 35.35 | -11.482 | 19.206 | 3.696  | -19.079 | -3.884  |       |       |
|                            | Combined   |       | -6.129  | 17.688 | 3.177  | -12.617 | .359    |       |       |
|                            | Total      | 22.30 | -10.347 | 18.219 | 2.147  | -14.628 | -6.066  |       |       |
| SF-36                      | Psychology | 19.01 | -11.429 | 14.335 | 3.831  | -19.705 | -3.152  | -.627 | -.731 |
| General health             | Nutrition  | 29.73 | -6.852  | 15.201 | 2.925  | -12.865 | -.839   |       |       |

1  
2  
3  
4  
5  
6  
7  
8  
9  
10  
11  
12  
13  
14  
15  
16  
17  
18  
19  
20  
21  
22  
23  
24  
25  
26  
27  
28  
29  
30  
31  
32  
33  
34  
35  
36  
37  
38  
39  
40  
41  
42  
43  
44  
45  
46  
47  
48  
49

|                       |            |       |         |        |        |         |        |       |       |
|-----------------------|------------|-------|---------|--------|--------|---------|--------|-------|-------|
| perceptions           | Combined   | 26.45 | -10.161 | 22.154 | 3.97   | -18.288 | -2.035 |       |       |
|                       | Total      | 36.49 | -9.167  | 18.251 | 2.151  | -13.455 | -4.878 |       |       |
| MHLCS Internal        | Psychology | 17.56 | -.146   | -.203  | -.054  | -.263   | -.029  | 3.402 | -.183 |
|                       | Nutrition  |       | -.573   | 3.028  | -.583  | -1.771  | -.625  |       |       |
|                       | Combined   |       | -.106   | -.315  | -.057  | -.222   | .010   |       |       |
|                       | Total      | 30.67 | -.289   | 1.859  | -.219  | -.726   | -.148  |       |       |
| MHLCS Chance          | Psychology | 4.67  | .077    | -.098  | -.026  | .021    | -.134  | 7.674 | .022* |
|                       | Nutrition  |       | -.570   | 3.019  | -.581  | -1.765  | -.624  |       |       |
|                       | Combined   |       | -.001   | -.081  | -.015  | -.029   | .031   |       |       |
|                       | Total      |       | -.198   | 1.852  | -.218  | -.633   | -.237  |       |       |
| MHLCS Powerful Others | Psychology |       | -.054   | -.284  | -.076  | -.218   | -.109  | 1.571 | -.456 |
|                       | Nutrition  |       | -.375   | 2.282  | -.439  | -1.277  | -.528  |       |       |
|                       | Combined   |       | -.030   | -.277  | -.050  | -.132   | .072   |       |       |
|                       | Total      |       | -.164   | 1.408  | -.166  | -.495   | -.167  |       |       |
| MHLCS Doctors         | Psychology |       | .020    | -.058  | -.0155 | -.014   | -.053  | 0.076 | -.963 |
|                       | Nutrition  |       | -.492   | 2.678  | -.515  | -1.551  | -.568  |       |       |
|                       | Combined   |       | -.057   | -.199  | -.036  | -.016   | -.130  |       |       |
|                       | Total      | 47.49 | -.156   | 1.647  | -.194  | -.543   | -.231  |       |       |
| MHLCS Other People    | Psychology |       | -.032   | -.166  | -.044  | -.128   | -.064  | 2.479 | -.290 |
|                       | Nutrition  |       | -.446   | 2.692  | -.518  | -1.510  | -.619  |       |       |
|                       | Combined   |       | -.012   | -.096  | -.017  | -.047   | .023   |       |       |
|                       | Total      |       | -.178   | 1.645  | -.193  | -.565   | -.208  |       |       |

|                       |            |       |       |       |      |        |       |       |       |
|-----------------------|------------|-------|-------|-------|------|--------|-------|-------|-------|
| MFI                   | Psychology | 13.58 | 2.571 | 2.766 | .739 | .975   | 4.168 | 6.790 | .034* |
| General Fatigue       | Nutrition  | 13.39 | 2.074 | 3.842 | .740 | .554   | 3.594 |       |       |
|                       | Combined   |       | .419  | 2.233 | .401 | -.400  | 1.238 |       |       |
|                       | Total      | 8.55  | 1.458 | 3.126 | .368 | .724   | 2.193 |       |       |
|                       |            |       |       |       |      |        |       |       |       |
| MFI                   | Psychology | 17.74 | 2.857 | 2.797 | .748 | 1.242  | 4.472 | 3.038 | .219  |
| Physical Fatigue      | Nutrition  | 15.00 | 2.444 | 4.371 | .841 | .716   | 4.173 |       |       |
|                       | Combined   | 6.42  | 1.290 | 2.735 | .491 | .287   | 2.294 |       |       |
|                       | Total      | 10.98 | 2.028 | 3.468 | .409 | 1.213  | 2.843 |       |       |
|                       |            |       |       |       |      |        |       |       |       |
| MFI                   | Psychology | 23.20 | 1.857 | 2.932 | .784 | .165   | 3.550 | 1.734 | .420  |
| Reduced Activity      | Nutrition  | 13.28 | 1.148 | 2.685 | .517 | .086   | 2.210 |       |       |
|                       | Combined   |       | .645  | 3.189 | .572 | -.525  | 1.815 |       |       |
|                       | Total      | 8.81  | 1.069 | 2.952 | .348 | .376   | 1.763 |       |       |
|                       |            |       |       |       |      |        |       |       |       |
| MFI                   | Psychology | 11.42 | 2.500 | 3.502 | .936 | .478   | 4.522 | 5.171 | .075  |
| Reduced Motivation    | Nutrition  | 14.64 | 1.593 | 3.511 | .676 | .204   | 2.982 |       |       |
|                       | Combined   |       | .129  | 3.471 | .624 | -1.144 | 1.402 |       |       |
|                       | Total      | 12.96 | 1.139 | 3.570 | .421 | .300   | 1.978 |       |       |
|                       |            |       |       |       |      |        |       |       |       |
| MFI                   | Psychology | 29.66 | 3.571 | 3.056 | .817 | 1.807  | 5.336 | 4.551 | .103  |
| Mental Fatigue        | Nutrition  | 12.83 | 1.519 | 3.631 | .699 | .082   | 2.955 |       |       |
|                       | Combined   |       | 1.161 | 4.267 | .766 | -.404  | 2.726 |       |       |
|                       | Total      | 12.79 | 1.764 | 3.880 | .457 | .852   | 2.676 |       |       |
|                       |            |       |       |       |      |        |       |       |       |
| CDC-CFS               | Psychology |       | 1.429 | 3.736 | .998 | .728   | 3.586 | 1.298 | .523  |
| Sore Throat           | Nutrition  | 56.23 | 1.185 | 2.661 | .512 | .133   | 2.238 |       |       |
|                       | Combined   |       | .500  | 4.591 | .825 | -1.184 | 2.184 |       |       |
|                       | Total      | 46.26 | .937  | 3.769 | .444 | .052   | 1.823 |       |       |
|                       |            |       |       |       |      |        |       |       |       |
| CDC-CFS Swollen Lymph | Psychology |       | -.143 | 2.932 | .784 | -1.835 | 1.550 | 0.462 | .794  |

1  
2  
3  
4  
5  
6  
7  
8  
9  
10  
11  
12  
13  
14  
15  
16  
17  
18  
19  
20  
21  
22  
23  
24  
25  
26  
27  
28  
29  
30  
31  
32  
33  
34  
35  
36  
37  
38  
39  
40  
41  
42  
43  
44  
45  
46  
47  
48  
49

|                                         |            |       |       |       |       |        |       |       |       |
|-----------------------------------------|------------|-------|-------|-------|-------|--------|-------|-------|-------|
| Lymph Nodes-Glands                      | Nutrition  | 10.09 | 1.247 | 2.700 | -.520 | -.179  | 2.316 |       |       |
|                                         | Combined   |       | -.794 | 6.549 | 1.176 | -1.608 | 3.197 |       |       |
|                                         | Total      |       | -.782 | 4.756 | -.560 | -.336  | 1.900 |       |       |
| CDC-CFS<br>Diarrhoea/Diarrhea           | Psychology |       | -.286 | 1.490 | -.398 | -1.146 | -.575 | 3.619 | -.164 |
|                                         | Nutrition  |       | -.926 | 2.868 | -.552 | -.209  | 2.060 |       |       |
|                                         | Combined   | 47.97 | 1.272 | 3.789 | -.681 | -.118  | 2.662 |       |       |
|                                         | Total      | 42.47 | -.839 | 3.134 | -.369 | -.103  | 1.576 |       |       |
| CDC-CFS Fatigue after<br>exertion       | Psychology |       | 2.286 | 4.811 | 1.286 | -.492  | 5.063 | 0.379 | -.827 |
|                                         | Nutrition  | 13.90 | 2.593 | 5.507 | 1.060 | -.414  | 4.771 |       |       |
|                                         | Combined   | 19.20 | 2.532 | 5.578 | 1.002 | -.486  | 4.578 |       |       |
|                                         | Total      | 16.32 | 2.507 | 5.339 | -.629 | 1.252  | 3.761 |       |       |
| CDC-CFS Muscle Aches<br>or Muscle Pains | Psychology | 10.34 | 2.500 | 4.034 | 1.078 | -.171  | 4.829 | 0.469 | -.791 |
|                                         | Nutrition  | 20.56 | 2.333 | 3.637 | -.700 | -.894  | 3.772 |       |       |
|                                         | Combined   |       | 2.070 | 5.335 | -.958 | -.113  | 4.027 |       |       |
|                                         | Total      | 21.01 | 2.253 | 4.459 | -.526 | 1.205  | 3.300 |       |       |
| CDC-CFS<br>Pain In Joints               | Psychology |       | 1.857 | 4.036 | 1.079 | -.473  | 4.187 | 0.054 | -.973 |
|                                         | Nutrition  | 16.40 | 1.393 | 3.721 | -.716 | -.079  | 2.865 |       |       |
|                                         | Combined   |       | 1.978 | 5.622 | 1.010 | -.084  | 4.040 |       |       |
|                                         | Total      | 28.32 | 1.735 | 4.634 | -.546 | -.646  | 2.824 |       |       |
| CDC-CFS Fever                           | Psychology |       | -.214 | 1.968 | -.526 | -1.351 | -.922 | 0.399 | -.819 |
|                                         | Nutrition  |       | -.604 | 2.311 | -.445 | -.310  | 1.519 |       |       |
|                                         | Combined   |       | 1.245 | 4.816 | -.865 | -.521  | 3.012 |       |       |
|                                         | Total      |       | -.721 | 3.573 | -.421 | -.118  | 1.561 |       |       |
| CDC-CFS Chills                          | Psychology | 23.40 | 1.571 | 2.738 | -.732 | -.009  | 3.152 | 1.517 | -.468 |
|                                         | Nutrition  | 40.74 | 2.148 | 3.097 | -.596 | -.923  | 3.373 |       |       |

1  
2  
3  
4  
5  
6  
7  
8  
9  
10  
11  
12  
13  
14  
15  
16  
17  
18  
19  
20  
21  
22  
23  
24  
25  
26  
27  
28  
29  
30  
31  
32  
33  
34  
35  
36  
37  
38  
39  
40  
41  
42  
43  
44  
45  
46  
47  
48  
49

|                                  |            |       |        |        |       |        |       |       |        |
|----------------------------------|------------|-------|--------|--------|-------|--------|-------|-------|--------|
|                                  | Combined   | 40.23 | 1.447  | 3.986  | .716  | -.015  | 2.909 |       |        |
|                                  | Total      | 37.00 | 1.734  | 3.421  | -.403 | -.930  | 2.538 |       |        |
| CDC-CFS Unrefreshing Sleep       | Psychology |       | 1.857  | 6.803  | 1.818 | -2.071 | 5.785 | 0.160 | .948   |
|                                  | Nutrition  |       | 2.148  | 6.904  | 1.329 | -.583  | 4.879 |       |        |
|                                  | Combined   |       | 1.581  | 5.726  | 1.029 | -.520  | 3.681 |       |        |
|                                  | Total      | 19.55 | 1.847  | 6.3123 | -.744 | -.364  | 3.331 |       |        |
| CDC-CFS Sleeping Problems        | Psychology |       | 2.786  | 5.352  | 1.430 | -.304  | 5.876 | 3.218 | .200   |
|                                  | Nutrition  |       | -.222  | 5.139  | -.989 | -2.255 | 1.811 |       |        |
|                                  | Combined   |       | 1.762  | 4.871  | -.875 | -.025  | 3.548 |       |        |
|                                  | Total      | 17.17 | 1.217  | 5.133  | -.605 | -.011  | 2.423 |       |        |
| CDC-CFS Headaches                | Psychology |       | -.7143 | 2.091  | -.559 | -1.922 | -.493 | 6.625 | -.036* |
|                                  | Nutrition  | 32.19 | 1.572  | 3.507  | -.675 | -.184  | 2.959 |       |        |
|                                  | Combined   | 36.18 | 2.467  | 4.944  | -.888 | -.653  | 4.280 |       |        |
|                                  | Total      | 29.32 | 1.512  | 4.124  | -.486 | -.543  | 2.482 |       |        |
| CDC-CFS Memory Problems          | Psychology | 44.73 | 2.857  | 4.655  | 1.244 | -.169  | 5.545 | 2.316 | -.314  |
|                                  | Nutrition  |       | -.111  | 4.925  | -.947 | -2.059 | 1.837 |       |        |
|                                  | Combined   |       | 1.949  | 6.011  | 1.080 | -.256  | 4.154 |       |        |
|                                  | Total      | 17.86 | 1.353  | 5.435  | -.641 | -.076  | 2.630 |       |        |
| CDC-CFS Difficulty Concentrating | Psychology | 39.50 | 4.643  | 4.534  | 1.212 | 2.025  | 7.261 | 5.945 | -.051  |
|                                  | Nutrition  |       | -.815  | 4.359  | -.839 | -.910  | 2.539 |       |        |
|                                  | Combined   |       | 2.170  | 5.877  | 1.056 | -.015  | 4.326 |       |        |
|                                  | Total      | 26.66 | 2.143  | 5.217  | -.615 | -.917  | 3.369 |       |        |
| CDC-CFS Nausea                   | Psychology |       | -.143  | 2.770  | -.740 | -1.456 | 1.742 | 4.773 | -.092  |
|                                  | Nutrition  |       | -.660  | 2.667  | -.513 | -.395  | 1.716 |       |        |
|                                  | Combined   |       | -.251  | 4.468  | -.803 | -1.388 | 1.890 |       |        |

|                                              |            |       |        |        |       |       |        |       |       |
|----------------------------------------------|------------|-------|--------|--------|-------|-------|--------|-------|-------|
|                                              | Total      |       | .384   | 3.535  | .417  | -.447 | 1.214  |       |       |
| CDC-CFS-Abdominal Pain                       | Psychology |       | -.286  | 1.729  | -.462 | -.713 | 1.284  | 1.082 | -.582 |
|                                              | Nutrition  | 29.05 | -.882  | 2.165  | -.417 | -.025 | 1.738  |       |       |
|                                              | Combined   |       | -.839  | 4.390  | -.789 | -.771 | 2.449  |       |       |
|                                              | Total      |       | -.747  | 3.234  | -.381 | -.013 | 1.507  |       |       |
| CDC-CFS-Sinus-Nasal Symptoms                 | Psychology |       | -.929  | 3.125  | -.835 | -.876 | 2.733  | 1.255 | -.534 |
|                                              | Nutrition  |       | 1.060  | 4.193  | -.807 | -.599 | 2.719  |       |       |
|                                              | Combined   | 20.56 | 1.906  | 5.923  | 1.063 | -.267 | 4.078  |       |       |
|                                              | Total      | 14.95 | 1.399  | 4.822  | -.568 | -.266 | 2.532  |       |       |
| CDC-CFS-Shortness-Of-Breath                  | Psychology |       | 1.500  | 3.459  | -.924 | -.497 | 3.497  | 0.707 | -.702 |
|                                              | Nutrition  | 18.28 | -.779  | 2.057  | -.403 | -.052 | 1.609  |       |       |
|                                              | Combined   |       | -.690  | 3.972  | -.725 | -.793 | 2.173  |       |       |
|                                              | Total      | 29.08 | -.885  | 3.243  | -.388 | -.112 | 1.658  |       |       |
| CDC-CFS-Sensitivity-To-Light                 | Psychology | 64.58 | 1.429  | 2.472  | -.661 | -.001 | 2.856  | 0.939 | -.625 |
|                                              | Nutrition  |       | 1.568  | 3.764  | -.725 | -.079 | 3.057  |       |       |
|                                              | Combined   |       | -.961  | 5.178  | -.930 | -.938 | 2.860  |       |       |
|                                              | Total      | 26.26 | 1.280  | 4.209  | -.496 | -.291 | 2.269  |       |       |
| CDC-CFS-Depression                           | Psychology |       | 1.429  | 3.502  | -.936 | -.593 | 3.451  | 0.490 | -.783 |
|                                              | Nutrition  |       | -.704  | 3.268  | -.629 | -.589 | 1.996  |       |       |
|                                              | Combined   |       | 1.363  | 5.345  | -.960 | -.598 | 3.323  |       |       |
|                                              | Total      | 39.55 | 1.129  | 4.282  | -.505 | -.122 | 2.135  |       |       |
| CDC-CFS-Maladaptive Stress-Index-Scale-Score | Psychology | 16.75 | 16.286 | 13.234 | 3.537 | 8.645 | 23.927 | 4.379 | -.112 |
|                                              | Nutrition  | 11.54 | 12.815 | 17.802 | 3.426 | 5.772 | 19.857 |       |       |
|                                              | Combined   | 10.98 | 9.613  | 26.424 | 4.746 | -.080 | 19.305 |       |       |
|                                              | Total      | 11.99 | 12.111 | 21.201 | 2.499 | 7.129 | 17.093 |       |       |



<sup>a</sup>see table 2 for descriptive and inferential statistics

<sup>b</sup>H-statistic for Kruskal-Wallis test, d.f. = 2

\* significant at the .05 level

**Table 1. Demographics for gender, age and illness duration across the three treatment groups**

|                  |            | Mean                    | SD     | 95% CI for Mean |        | Test statistic    | p-value |
|------------------|------------|-------------------------|--------|-----------------|--------|-------------------|---------|
|                  |            |                         |        | Lower           | Upper  |                   |         |
| Gender           | Psychology | 9 (21.4%) <sup>d</sup>  |        |                 |        | .179 <sup>c</sup> | .915    |
|                  | Nutrition  | 8 (18.2%) <sup>d</sup>  |        |                 |        |                   |         |
|                  | Combined   | 11 (21.2%) <sup>d</sup> |        |                 |        |                   |         |
|                  | Total      | 28 (20.3%) <sup>d</sup> |        |                 |        |                   |         |
| Age              | Psychology | 42.881                  | 13.986 | 38.523          | 47.239 | .000 <sup>a</sup> | 1.000   |
|                  | Nutrition  | 42.864                  | 12.504 | 39.062          | 46.665 |                   |         |
|                  | Combined   | 42.843                  | 11.125 | 39.714          | 45.972 |                   |         |
|                  | Total      | 42.861                  | 12.406 | 40.765          | 44.957 |                   |         |
| Illness duration | Psychology | 8.874                   | 8.252  | 6.302           | 11.445 | .252 <sup>a</sup> | .778    |
|                  | Nutrition  | 10.023                  | 7.375  | 7.781           | 12.265 |                   |         |
|                  | Combined   | 9.625                   | 7.291  | 7.595           | 11.655 |                   |         |
|                  | Total      | 9.523                   | 7.580  | 8.247           | 10.800 |                   |         |

**Table 2. Comparisons across time within the primary outcome measures**

|                |            | Baseline |        |                 |        | 3-month follow-up |        |                 |        | Comparisons |         |
|----------------|------------|----------|--------|-----------------|--------|-------------------|--------|-----------------|--------|-------------|---------|
|                |            | Mean     | SD     | 95% CI for Mean |        | Mean              | SD     | 95% CI for Mean |        | z-statistic | p-value |
|                |            |          |        | Lower           | Upper  |                   |        | Lower           | Upper  |             |         |
| SF-36          | Psychology | 49.339   | 22.698 | 42.266          | 56.413 | 59.267            | 30.346 | 41.745          | 76.788 | -2.707      | .007**  |
| Physical       | Nutrition  | 47.855   | 26.226 | 39.882          | 55.829 | 46.706            | 30.744 | 34.544          | 58.868 | -1.136      | .256    |
| Functioning    | Combined   | 45.299   | 25.479 | 38.206          | 52.393 | 49.288            | 26.403 | 39.604          | 58.973 | -1.850      | .064    |
|                | Total      | 47.344   | 24.791 | 43.171          | 51.517 | 50.260            | 28.818 | 43.488          | 57.032 | -3.120      | .002**  |
| SF-36          | Psychology | 7.143    | 15.894 | 2.190           | 12.096 | 46.429            | 39.048 | 23.883          | 68.974 | -2.379      | .017*   |
| Role           | Nutrition  | 7.574    | 17.500 | 2.254           | 12.895 | 19.444            | 20.016 | 11.526          | 27.363 | -2.907      | .004**  |
| limitations    | Combined   | 9.774    | 21.051 | 3.914           | 15.635 | 22.742            | 25.161 | 13.513          | 31.971 | -2.225      | .026*   |
| physical       | Total      | 8.272    | 18.387 | 5.177           | 11.367 | 26.111            | 28.225 | 19.479          | 32.744 | -4.354      | .001*** |
| SF-36          | Psychology | 61.548   | 25.614 | 53.566          | 69.530 | 63.929            | 29.786 | 46.731          | 81.127 | -1.196      | .232    |
| Bodily pain    | Nutrition  | 55.625   | 30.242 | 46.434          | 64.819 | 58.889            | 32.943 | 45.857          | 71.921 | -1.800      | .072    |
|                | Combined   | 53.606   | 27.019 | 46.084          | 61.128 | 58.629            | 27.301 | 48.615          | 68.643 | -1.048      | .294    |
|                | Total      | 56.667   | 27.683 | 52.007          | 61.327 | 59.757            | 29.649 | 52.790          | 66.724 | -2.240      | .025*   |
| SF-36          | Psychology | 37.202   | 21.824 | 30.402          | 44.003 | 59.821            | 33.318 | 40.584          | 79.058 | -2.689      | .007**  |
| Social         | Nutrition  | 32.671   | 25.888 | 24.800          | 40.541 | 43.519            | 33.679 | 30.196          | 56.841 | -2.476      | .013*   |
| functioning    | Combined   | 32.452   | 24.786 | 25.551          | 39.352 | 41.936            | 28.604 | 31.443          | 52.428 | -2.426      | .015*   |
|                | Total      | 33.967   | 24.212 | 29.892          | 38.043 | 46.007            | 31.805 | 38.533          | 53.481 | -4.504      | .001*** |
| SF-36          | Psychology | 60.286   | 19.584 | 54.183          | 66.389 | 74.571            | 13.276 | 66.906          | 82.237 | -2.497      | .013*   |
| General mental | Nutrition  | 59.727   | 19.355 | 53.843          | 65.612 | 64.741            | 20.548 | 56.612          | 72.869 | -1.696      | .090    |
| health         | Combined   | 58.308   | 20.948 | 52.476          | 64.140 | 64.129            | 16.637 | 58.027          | 70.232 | -.524       | .600    |
|                | Total      | 59.362   | 19.911 | 56.011          | 62.714 | 66.389            | 17.897 | 62.183          | 70.594 | -2.665      | .008**  |
| SF-36          | Psychology | 55.554   | 46.368 | 41.105          | 70.004 | 76.191            | 33.150 | 57.051          | 95.331 | -.842       | .400    |

|                 |            |        |         |        |        |        |        |        |        |        |         |
|-----------------|------------|--------|---------|--------|--------|--------|--------|--------|--------|--------|---------|
| Role            | Nutrition  | 48.482 | 47.390  | 34.074 | 62.890 | 55.594 | 38.130 | 40.510 | 70.678 | -1.788 | .074    |
| limitations     | Combined   | 47.780 | 43.924  | 35.551 | 60.008 | 67.742 | 32.756 | 55.727 | 79.757 | -2.313 | .021*   |
| emotional       | Total      | 50.370 | 45.590  | 42.695 | 58.044 | 64.829 | 35.335 | 56.526 | 73.133 | -3.159 | .002**  |
| SF-36           | Psychology | 20.714 | 16.139  | 15.685 | 25.743 | 41.071 | 20.586 | 29.186 | 52.957 | -3.066 | .002**  |
| Vitality Energy | Nutrition  | 20.114 | 14.5670 | 15.685 | 24.542 | 31.111 | 23.588 | 21.780 | 40.442 | -2.734 | .006**  |
| or Fatigue      | Combined   | 19.039 | 17.658  | 14.123 | 23.955 | 27.097 | 19.527 | 19.934 | 34.259 | -1.558 | .119    |
|                 | Total      | 19.891 | 16.159  | 17.171 | 22.611 | 31.319 | 21.657 | 26.230 | 36.409 | -4.205 | .001*** |
| SF-36           | Psychology | 37.024 | 17.945  | 31.432 | 42.616 | 45.714 | 21.109 | 33.526 | 57.903 | -2.561 | .010*   |
| General health  | Nutrition  | 28.636 | 15.528  | 23.915 | 33.357 | 36.482 | 18.903 | 29.004 | 43.959 | -2.157 | .031*   |
| perceptions     | Combined   | 30.962 | 17.575  | 26.069 | 35.854 | 42.097 | 21.632 | 34.162 | 50.032 | -2.423 | .015*   |
|                 | Total      | 32.065 | 17.286  | 29.156 | 34.975 | 40.694 | 20.561 | 35.863 | 45.526 | -3.996 | .001*** |
| MFI             | Psychology | 15.952 | 2.845   | 15.066 | 16.839 | 13.786 | 4.441  | 11.222 | 16.350 | -2.657 | .008**  |
| General         | Nutrition  | 16.977 | 2.601   | 16.186 | 17.768 | 14.704 | 4.898  | 12.766 | 16.641 | -2.548 | .011*   |
| Fatigue         | Combined   | 17.327 | 2.588   | 16.607 | 18.047 | 16.645 | 2.811  | 15.614 | 17.676 | -.854  | .393    |
|                 | Total      | 16.797 | 2.716   | 16.340 | 17.254 | 15.361 | 4.136  | 14.389 | 16.333 | -3.692 | .001*** |
| MFI             | Psychology | 15.929 | 3.331   | 14.891 | 16.966 | 13.071 | 4.632  | 10.397 | 15.746 | -2.810 | .005**  |
| Physical        | Nutrition  | 16.727 | 3.358   | 15.707 | 17.748 | 14.222 | 4.987  | 12.249 | 16.195 | -2.791 | .005**  |
| Fatigue         | Combined   | 17.615 | 2.823   | 16.830 | 18.401 | 16.484 | 3.395  | 15.239 | 17.729 | -2.364 | .018*   |
|                 | Total      | 16.819 | 3.211   | 16.278 | 17.359 | 14.972 | 4.453  | 13.926 | 16.019 | -4.591 | .001*** |
| MFI             | Psychology | 13.857 | 4.112   | 12.576 | 15.138 | 10.643 | 5.153  | 7.668  | 13.618 | -2.142 | .032*   |
| Reduced         | Nutrition  | 14.136 | 4.027   | 12.912 | 15.361 | 12.259 | 5.012  | 10.277 | 14.242 | -2.164 | .030*   |
| Activity        | Combined   | 14.962 | 3.662   | 13.942 | 15.981 | 14.936 | 3.777  | 13.550 | 16.321 | -.070  | .944    |
|                 | Total      | 14.362 | 3.921   | 13.702 | 15.022 | 13.097 | 4.798  | 11.970 | 14.225 | -2.421 | .015*   |
| MFI             | Psychology | 10.357 | 4.287   | 9.021  | 11.693 | 7.286  | 4.214  | 4.853  | 9.719  | -2.131 | .033*   |
| Reduced         | Nutrition  | 10.500 | 3.474   | 9.444  | 11.556 | 8.963  | 3.736  | 7.485  | 10.441 | -1.985 | .047*   |

1  
2  
3  
4  
5  
6  
7  
8  
9  
10  
11  
12  
13  
14  
15  
16  
17  
18  
19  
20  
21  
22  
23  
24  
25  
26  
27  
28  
29  
30  
31  
32  
33  
34  
35  
36  
37  
38  
39  
40  
41  
42  
43  
44  
45  
46  
47  
48  
49

|                       |                   |               |              |               |               |               |              |               |               |               |                |
|-----------------------|-------------------|---------------|--------------|---------------|---------------|---------------|--------------|---------------|---------------|---------------|----------------|
| <u>Motivation</u>     | <u>Combined</u>   | <u>11.462</u> | <u>3.153</u> | <u>10.584</u> | <u>12.339</u> | <u>10.774</u> | <u>3.095</u> | <u>9.639</u>  | <u>11.910</u> | <u>-1.082</u> | <u>.279</u>    |
|                       | <u>Total</u>      | <u>10.819</u> | <u>3.639</u> | <u>10.206</u> | <u>11.431</u> | <u>9.417</u>  | <u>3.767</u> | <u>8.532</u>  | <u>10.302</u> | <u>-2.986</u> | <u>.003**</u>  |
| <u>MFI</u>            | <u>Psychology</u> | <u>13.524</u> | <u>4.363</u> | <u>12.164</u> | <u>14.883</u> | <u>10.500</u> | <u>4.468</u> | <u>7.920</u>  | <u>13.080</u> | <u>-2.950</u> | <u>.003*</u>   |
| <u>Mental Fatigue</u> | <u>Nutrition</u>  | <u>13.682</u> | <u>4.328</u> | <u>12.366</u> | <u>14.998</u> | <u>11.926</u> | <u>5.334</u> | <u>9.816</u>  | <u>14.036</u> | <u>-2.082</u> | <u>.037*</u>   |
|                       | <u>Combined</u>   | <u>13.846</u> | <u>4.345</u> | <u>12.637</u> | <u>15.056</u> | <u>12.613</u> | <u>3.827</u> | <u>11.209</u> | <u>14.017</u> | <u>-1.586</u> | <u>.113</u>    |
|                       | <u>Total</u>      | <u>13.696</u> | <u>4.315</u> | <u>12.969</u> | <u>14.422</u> | <u>11.944</u> | <u>4.568</u> | <u>10.871</u> | <u>13.018</u> | <u>-3.661</u> | <u>.001***</u> |

<sup>a</sup>z-statistic for Wilcoxon Signed-Rank Test

**Table 3. Comparisons across time within the secondary outcome measures (ME/CFS-specific)**

|                    |                   | <u>Baseline</u> |              |                        |              | <u>3-month follow-up</u> |              |                        |              | <u>Comparisons</u> |                |
|--------------------|-------------------|-----------------|--------------|------------------------|--------------|--------------------------|--------------|------------------------|--------------|--------------------|----------------|
|                    |                   | <u>Mean</u>     | <u>SD</u>    | <u>95% CI for Mean</u> |              | <u>Mean</u>              | <u>SD</u>    | <u>95% CI for Mean</u> |              | <u>z-statistic</u> | <u>p-value</u> |
|                    |                   |                 |              | <u>Lower</u>           | <u>Upper</u> |                          |              | <u>Lower</u>           | <u>Upper</u> |                    |                |
| <u>CDC CFS</u>     | <u>Psychology</u> | <u>2.571</u>    | <u>3.109</u> | <u>1.603</u>           | <u>3.540</u> | <u>1.429</u>             | <u>2.278</u> | <u>.114</u>            | <u>2.744</u> | <u>-1.365</u>      | <u>.172</u>    |
| <u>Sore Throat</u> | <u>Nutrition</u>  | <u>3.977</u>    | <u>3.776</u> | <u>2.829</u>           | <u>5.125</u> | <u>1.741</u>             | <u>2.087</u> | <u>.915</u>            | <u>2.566</u> | <u>-2.211</u>      | <u>.027*</u>   |
|                    | <u>Combined</u>   | <u>3.202</u>    | <u>4.494</u> | <u>1.951</u>           | <u>4.454</u> | <u>1.904</u>             | <u>2.821</u> | <u>.870</u>            | <u>2.939</u> | <u>-.804</u>       | <u>.422</u>    |
|                    | <u>Total</u>      | <u>3.257</u>    | <u>3.898</u> | <u>2.601</u>           | <u>3.914</u> | <u>1.750</u>             | <u>2.437</u> | <u>1.178</u>           | <u>2.323</u> | <u>-2.387</u>      | <u>.017*</u>   |
| <u>CDC CFS</u>     | <u>Psychology</u> | <u>1.976</u>    | <u>3.382</u> | <u>.922</u>            | <u>3.030</u> | <u>1.786</u>             | <u>3.378</u> | <u>-.165</u>           | <u>3.736</u> | <u>-.341</u>       | <u>.733</u>    |
| <u>Swollen</u>     | <u>Nutrition</u>  | <u>5.561</u>    | <u>6.491</u> | <u>3.587</u>           | <u>7.534</u> | <u>5.000</u>             | <u>6.760</u> | <u>2.326</u>           | <u>7.674</u> | <u>-2.212</u>      | <u>.027*</u>   |
| <u>Lymph nodes</u> | <u>Combined</u>   | <u>3.462</u>    | <u>4.881</u> | <u>2.103</u>           | <u>4.820</u> | <u>2.690</u>             | <u>4.477</u> | <u>1.0458</u>          | <u>4.332</u> | <u>-.725</u>       | <u>.468</u>    |
| <u>Glands</u>      | <u>Total</u>      | <u>3.679</u>    | <u>5.250</u> | <u>2.795</u>           | <u>4.563</u> | <u>3.380</u>             | <u>5.385</u> | <u>2.115</u>           | <u>4.646</u> | <u>-1.684</u>      | <u>.092</u>    |
| <u>CDC CFS</u>     | <u>Psychology</u> | <u>2.071</u>    | <u>3.249</u> | <u>1.059</u>           | <u>3.084</u> | <u>1.643</u>             | <u>2.818</u> | <u>.016</u>            | <u>3.270</u> | <u>-.730</u>       | <u>.465</u>    |

|                                     |                   |               |              |               |               |               |              |              |               |               |                |
|-------------------------------------|-------------------|---------------|--------------|---------------|---------------|---------------|--------------|--------------|---------------|---------------|----------------|
| <u>Diarrhea</u>                     | <u>Nutrition</u>  | <u>2.841</u>  | <u>4.832</u> | <u>1.372</u>  | <u>4.310</u>  | <u>1.444</u>  | <u>3.274</u> | <u>.149</u>  | <u>2.740</u>  | <u>-1.649</u> | <u>.099</u>    |
|                                     | <u>Combined</u>   | <u>3.135</u>  | <u>3.773</u> | <u>2.084</u>  | <u>4.185</u>  | <u>1.631</u>  | <u>2.483</u> | <u>.720</u>  | <u>2.542</u>  | <u>-1.996</u> | <u>.046*</u>   |
|                                     | <u>Total</u>      | <u>2.717</u>  | <u>3.998</u> | <u>2.044</u>  | <u>3.390</u>  | <u>1.563</u>  | <u>2.827</u> | <u>.899</u>  | <u>2.228</u>  | <u>-2.481</u> | <u>.013*</u>   |
| <u>CDC CFS</u>                      | <u>Psychology</u> | <u>13.286</u> | <u>6.271</u> | <u>11.331</u> | <u>15.240</u> | <u>11.071</u> | <u>6.673</u> | <u>7.218</u> | <u>14.925</u> | <u>-1.550</u> | <u>.121</u>    |
| <u>Fatigue after exertion</u>       | <u>Nutrition</u>  | <u>13.722</u> | <u>6.450</u> | <u>11.761</u> | <u>15.682</u> | <u>11.815</u> | <u>7.217</u> | <u>8.960</u> | <u>14.670</u> | <u>-2.209</u> | <u>.027*</u>   |
|                                     | <u>Combined</u>   | <u>14.154</u> | <u>6.270</u> | <u>12.408</u> | <u>15.899</u> | <u>11.436</u> | <u>6.275</u> | <u>9.134</u> | <u>13.738</u> | <u>-2.392</u> | <u>.017*</u>   |
|                                     | <u>Total</u>      | <u>13.752</u> | <u>6.292</u> | <u>12.693</u> | <u>14.811</u> | <u>11.507</u> | <u>6.629</u> | <u>9.949</u> | <u>13.065</u> | <u>-3.574</u> | <u>.001***</u> |
| <u>CDC CFS</u>                      | <u>Psychology</u> | <u>8.286</u>  | <u>6.747</u> | <u>6.183</u>  | <u>10.388</u> | <u>7.429</u>  | <u>6.892</u> | <u>3.450</u> | <u>11.408</u> | <u>-2.145</u> | <u>.032*</u>   |
| <u>Muscle Aches or Muscle Pains</u> | <u>Nutrition</u>  | <u>9.091</u>  | <u>6.383</u> | <u>7.151</u>  | <u>11.031</u> | <u>7.222</u>  | <u>6.278</u> | <u>4.739</u> | <u>9.706</u>  | <u>-2.901</u> | <u>.004**</u>  |
|                                     | <u>Combined</u>   | <u>8.519</u>  | <u>6.932</u> | <u>6.589</u>  | <u>10.449</u> | <u>6.188</u>  | <u>5.528</u> | <u>4.160</u> | <u>8.215</u>  | <u>-1.908</u> | <u>.056</u>    |
|                                     | <u>Total</u>      | <u>8.630</u>  | <u>6.664</u> | <u>7.509</u>  | <u>9.752</u>  | <u>6.817</u>  | <u>6.029</u> | <u>5.400</u> | <u>8.234</u>  | <u>-3.995</u> | <u>.001***</u> |
| <u>CDC CFS</u>                      | <u>Psychology</u> | <u>3.476</u>  | <u>5.334</u> | <u>1.814</u>  | <u>5.138</u>  | <u>2.786</u>  | <u>4.458</u> | <u>.212</u>  | <u>5.360</u>  | <u>-1.778</u> | <u>.075</u>    |
| <u>Pain In Joints</u>               | <u>Nutrition</u>  | <u>4.696</u>  | <u>5.560</u> | <u>3.006</u>  | <u>6.386</u>  | <u>3.926</u>  | <u>5.099</u> | <u>1.909</u> | <u>5.943</u>  | <u>-2.022</u> | <u>.043*</u>   |
|                                     | <u>Combined</u>   | <u>5.474</u>  | <u>6.386</u> | <u>3.696</u>  | <u>7.251</u>  | <u>3.010</u>  | <u>4.140</u> | <u>1.492</u> | <u>4.528</u>  | <u>-1.840</u> | <u>.066</u>    |
|                                     | <u>Total</u>      | <u>4.618</u>  | <u>5.837</u> | <u>3.635</u>  | <u>5.600</u>  | <u>3.310</u>  | <u>4.543</u> | <u>2.242</u> | <u>4.377</u>  | <u>-3.141</u> | <u>.002**</u>  |
| <u>CDC CFS</u>                      | <u>Psychology</u> | <u>1.238</u>  | <u>2.516</u> | <u>.454</u>   | <u>2.022</u>  | <u>1.643</u>  | <u>4.181</u> | <u>-.771</u> | <u>4.057</u>  | <u>-.135</u>  | <u>.892</u>    |
| <u>Fever</u>                        | <u>Nutrition</u>  | <u>1.394</u>  | <u>2.562</u> | <u>.615</u>   | <u>2.173</u>  | <u>.630</u>   | <u>2.041</u> | <u>-.178</u> | <u>1.437</u>  | <u>-1.487</u> | <u>.137</u>    |
|                                     | <u>Combined</u>   | <u>1.333</u>  | <u>3.909</u> | <u>.245</u>   | <u>2.421</u>  | <u>.378</u>   | <u>.709</u>  | <u>.118</u>  | <u>.638</u>   | <u>-1.517</u> | <u>.129</u>    |
|                                     | <u>Total</u>      | <u>1.324</u>  | <u>3.106</u> | <u>.801</u>   | <u>1.846</u>  | <u>.718</u>   | <u>2.272</u> | <u>.185</u>  | <u>1.252</u>  | <u>-1.876</u> | <u>.061</u>    |
| <u>CDC CFS</u>                      | <u>Psychology</u> | <u>3.357</u>  | <u>4.637</u> | <u>1.912</u>  | <u>4.802</u>  | <u>2.571</u>  | <u>4.398</u> | <u>.032</u>  | <u>5.111</u>  | <u>-1.970</u> | <u>.049*</u>   |
| <u>Chills</u>                       | <u>Nutrition</u>  | <u>3.750</u>  | <u>3.924</u> | <u>2.557</u>  | <u>4.943</u>  | <u>2.222</u>  | <u>4.098</u> | <u>.601</u>  | <u>3.843</u>  | <u>-3.401</u> | <u>.001***</u> |
|                                     | <u>Combined</u>   | <u>3.192</u>  | <u>4.343</u> | <u>1.983</u>  | <u>4.402</u>  | <u>1.908</u>  | <u>2.797</u> | <u>.882</u>  | <u>2.934</u>  | <u>-2.049</u> | <u>.040*</u>   |
|                                     | <u>Total</u>      | <u>3.420</u>  | <u>4.283</u> | <u>2.699</u>  | <u>4.141</u>  | <u>2.155</u>  | <u>3.614</u> | <u>1.306</u> | <u>3.004</u>  | <u>-4.206</u> | <u>.001***</u> |
| <u>CDC CFS</u>                      | <u>Psychology</u> | <u>12.905</u> | <u>6.792</u> | <u>10.788</u> | <u>15.021</u> | <u>10.643</u> | <u>6.698</u> | <u>6.776</u> | <u>14.510</u> | <u>-.802</u>  | <u>.422</u>    |
| <u>UnrefreshingSl</u>               | <u>Nutrition</u>  | <u>12.250</u> | <u>7.088</u> | <u>10.095</u> | <u>14.405</u> | <u>9.444</u>  | <u>7.738</u> | <u>6.384</u> | <u>12.505</u> | <u>-1.421</u> | <u>.155</u>    |

|    |                      |                   |               |              |               |               |               |              |              |               |               |                |
|----|----------------------|-------------------|---------------|--------------|---------------|---------------|---------------|--------------|--------------|---------------|---------------|----------------|
| 8  | <u>cep</u>           | <u>Combined</u>   | <u>12.154</u> | <u>7.147</u> | <u>10.164</u> | <u>14.143</u> | <u>10.161</u> | <u>7.959</u> | <u>7.242</u> | <u>13.080</u> | <u>-1.513</u> | <u>.130</u>    |
| 9  |                      | <u>Total</u>      | <u>12.413</u> | <u>6.978</u> | <u>11.238</u> | <u>13.588</u> | <u>9.986</u>  | <u>7.557</u> | <u>8.210</u> | <u>11.762</u> | <u>-2.295</u> | <u>.022*</u>   |
| 10 | <u>CDC CFS</u>       | <u>Psychology</u> | <u>9.286</u>  | <u>7.658</u> | <u>6.899</u>  | <u>11.672</u> | <u>5.286</u>  | <u>4.921</u> | <u>2.444</u> | <u>8.127</u>  | <u>-1.738</u> | <u>.082</u>    |
| 11 | <u>Sleeping</u>      | <u>Nutrition</u>  | <u>8.614</u>  | <u>7.317</u> | <u>6.389</u>  | <u>10.838</u> | <u>9.482</u>  | <u>9.200</u> | <u>5.842</u> | <u>13.121</u> | <u>-.190</u>  | <u>.849</u>    |
| 12 | <u>Problems</u>      | <u>Combined</u>   | <u>8.904</u>  | <u>7.681</u> | <u>6.766</u>  | <u>11.042</u> | <u>6.529</u>  | <u>6.749</u> | <u>4.053</u> | <u>9.004</u>  | <u>-1.794</u> | <u>.073</u>    |
| 13 |                      | <u>Total</u>      | <u>8.928</u>  | <u>7.509</u> | <u>7.664</u>  | <u>10.192</u> | <u>7.394</u>  | <u>7.585</u> | <u>5.612</u> | <u>9.177</u>  | <u>-1.983</u> | <u>.047*</u>   |
| 14 | <u>CDC CFS</u>       | <u>Psychology</u> | <u>5.262</u>  | <u>5.548</u> | <u>3.533</u>  | <u>6.991</u>  | <u>4.357</u>  | <u>3.411</u> | <u>2.388</u> | <u>6.326</u>  | <u>-1.200</u> | <u>.230</u>    |
| 15 | <u>Headaches</u>     | <u>Nutrition</u>  | <u>7.646</u>  | <u>7.040</u> | <u>5.506</u>  | <u>9.786</u>  | <u>5.185</u>  | <u>6.294</u> | <u>2.695</u> | <u>7.675</u>  | <u>-2.084</u> | <u>.037*</u>   |
| 16 |                      | <u>Combined</u>   | <u>6.346</u>  | <u>5.857</u> | <u>4.715</u>  | <u>7.977</u>  | <u>4.050</u>  | <u>3.527</u> | <u>2.756</u> | <u>5.343</u>  | <u>-2.807</u> | <u>.005**</u>  |
| 17 |                      | <u>Total</u>      | <u>6.431</u>  | <u>6.200</u> | <u>5.387</u>  | <u>7.474</u>  | <u>4.535</u>  | <u>4.708</u> | <u>3.429</u> | <u>5.642</u>  | <u>-3.000</u> | <u>.003**</u>  |
| 18 | <u>CDC CFS</u>       | <u>Psychology</u> | <u>6.333</u>  | <u>4.996</u> | <u>4.777</u>  | <u>7.890</u>  | <u>3.500</u>  | <u>3.995</u> | <u>1.193</u> | <u>5.807</u>  | <u>-1.965</u> | <u>.049*</u>   |
| 19 | <u>Memory</u>        | <u>Nutrition</u>  | <u>9.409</u>  | <u>7.183</u> | <u>7.225</u>  | <u>11.593</u> | <u>8.667</u>  | <u>7.681</u> | <u>5.628</u> | <u>11.705</u> | <u>-.338</u>  | <u>.735</u>    |
| 20 | <u>Problems</u>      | <u>Combined</u>   | <u>8.173</u>  | <u>7.610</u> | <u>6.055</u>  | <u>10.292</u> | <u>6.148</u>  | <u>4.905</u> | <u>4.349</u> | <u>7.947</u>  | <u>-1.446</u> | <u>.148</u>    |
| 21 |                      | <u>Total</u>      | <u>8.007</u>  | <u>6.835</u> | <u>6.857</u>  | <u>9.158</u>  | <u>6.578</u>  | <u>6.189</u> | <u>5.123</u> | <u>8.032</u>  | <u>-2.053</u> | <u>.040*</u>   |
| 22 | <u>CDC CFS</u>       | <u>Psychology</u> | <u>8.500</u>  | <u>6.094</u> | <u>6.601</u>  | <u>10.399</u> | <u>5.143</u>  | <u>5.559</u> | <u>1.933</u> | <u>8.353</u>  | <u>-2.809</u> | <u>.005**</u>  |
| 23 | <u>Difficulty</u>    | <u>Nutrition</u>  | <u>9.822</u>  | <u>7.641</u> | <u>7.499</u>  | <u>12.145</u> | <u>7.778</u>  | <u>6.941</u> | <u>5.032</u> | <u>10.524</u> | <u>-1.196</u> | <u>.232</u>    |
| 24 | <u>Concentrating</u> | <u>Combined</u>   | <u>9.135</u>  | <u>6.942</u> | <u>7.202</u>  | <u>11.067</u> | <u>6.507</u>  | <u>4.843</u> | <u>4.731</u> | <u>8.283</u>  | <u>-1.899</u> | <u>.058</u>    |
| 25 |                      | <u>Total</u>      | <u>9.161</u>  | <u>6.903</u> | <u>7.999</u>  | <u>10.323</u> | <u>6.718</u>  | <u>5.844</u> | <u>5.345</u> | <u>8.092</u>  | <u>-3.440</u> | <u>.001***</u> |
| 26 | <u>CDC CFS</u>       | <u>Psychology</u> | <u>3.476</u>  | <u>4.845</u> | <u>1.966</u>  | <u>4.986</u>  | <u>2.286</u>  | <u>2.946</u> | <u>.585</u>  | <u>3.987</u>  | <u>-.213</u>  | <u>.832</u>    |
| 27 | <u>Nausea</u>        | <u>Nutrition</u>  | <u>4.769</u>  | <u>5.135</u> | <u>3.208</u>  | <u>6.330</u>  | <u>3.407</u>  | <u>5.746</u> | <u>1.134</u> | <u>5.681</u>  | <u>-1.686</u> | <u>.092</u>    |
| 28 |                      | <u>Combined</u>   | <u>3.327</u>  | <u>4.902</u> | <u>1.962</u>  | <u>4.692</u>  | <u>3.458</u>  | <u>3.585</u> | <u>2.144</u> | <u>4.773</u>  | <u>-.855</u>  | <u>.392</u>    |
| 29 |                      | <u>Total</u>      | <u>3.832</u>  | <u>4.966</u> | <u>2.996</u>  | <u>4.668</u>  | <u>3.211</u>  | <u>4.396</u> | <u>2.178</u> | <u>4.244</u>  | <u>-.584</u>  | <u>.559</u>    |
| 30 | <u>CDC CFS</u>       | <u>Psychology</u> | <u>2.548</u>  | <u>3.270</u> | <u>1.529</u>  | <u>3.567</u>  | <u>2.786</u>  | <u>4.003</u> | <u>.474</u>  | <u>5.097</u>  | <u>-.343</u>  | <u>.732</u>    |
| 31 | <u>Abdominal</u>     | <u>Nutrition</u>  | <u>5.064</u>  | <u>5.165</u> | <u>3.493</u>  | <u>6.634</u>  | <u>3.593</u>  | <u>3.905</u> | <u>2.048</u> | <u>5.137</u>  | <u>-1.968</u> | <u>.049*</u>   |
| 32 | <u>Pain</u>          | <u>Combined</u>   | <u>3.750</u>  | <u>4.635</u> | <u>2.460</u>  | <u>5.041</u>  | <u>2.548</u>  | <u>2.791</u> | <u>1.524</u> | <u>3.572</u>  | <u>-.598</u>  | <u>.550</u>    |

1  
2  
3  
4  
5  
6  
7  
8  
9  
10  
11  
12  
13  
14  
15  
16  
17  
18  
19  
20  
21  
22  
23  
24  
25  
26  
27  
28  
29  
30  
31  
32  
33  
34  
35  
36  
37  
38  
39  
40  
41  
42  
43  
44  
45  
46  
47  
48  
49

|                |              |              |              |              |              |              |              |              |              |               |               |
|----------------|--------------|--------------|--------------|--------------|--------------|--------------|--------------|--------------|--------------|---------------|---------------|
|                | <u>Total</u> | <u>3.803</u> | <u>4.535</u> | <u>3.040</u> | <u>4.566</u> | <u>2.986</u> | <u>3.470</u> | <u>2.171</u> | <u>3.801</u> | <u>-1.727</u> | <u>.084</u>   |
| CDC CFS        | Psychology   | 3.524        | 4.702        | 2.059        | 4.989        | 2.357        | 2.437        | .950         | 3.764        | -.724         | .469          |
| Sinus Nasal    | Nutrition    | 5.469        | 6.476        | 3.500        | 7.438        | 4.889        | 6.104        | 2.474        | 7.304        | -1.400        | .162          |
| Symptoms       | Combined     | 4.789        | 6.304        | 3.034        | 6.544        | 3.804        | 6.710        | 1.343        | 6.266        | -2.482        | .013*         |
|                | <u>Total</u> | <u>4.620</u> | <u>5.931</u> | <u>3.622</u> | <u>5.619</u> | <u>3.930</u> | <u>5.882</u> | <u>2.547</u> | <u>5.312</u> | <u>-2.971</u> | <u>.003**</u> |
| CDC CFS        | Psychology   | 3.000        | 4.191        | 1.694        | 4.306        | 1.571        | 2.209        | .296         | 2.847        | -1.556        | .120          |
| Shortness Of   | Nutrition    | 3.285        | 4.090        | 2.026        | 4.543        | 2.407        | 4.060        | .801         | 4.013        | -1.849        | .064          |
| Breath         | Combined     | 3.392        | 4.788        | 2.046        | 4.739        | 2.526        | 3.631        | 1.194        | 3.858        | -.976         | .329          |
|                | <u>Total</u> | <u>3.237</u> | <u>4.365</u> | <u>2.497</u> | <u>3.977</u> | <u>2.296</u> | <u>3.554</u> | <u>1.461</u> | <u>3.131</u> | <u>-2.538</u> | <u>.011*</u>  |
| CDC CFS        | Psychology   | 3.429        | 5.347        | 1.762        | 5.095        | 1.214        | 2.517        | -.239        | 2.668        | -1.973        | .049*         |
| Sensitivity To | Nutrition    | 5.031        | 6.097        | 3.177        | 6.884        | 4.111        | 6.198        | 1.659        | 6.563        | -2.136        | .033*         |
| Light          | Combined     | 4.481        | 6.360        | 2.710        | 6.251        | 3.297        | 5.557        | 1.259        | 5.335        | -.787         | .431          |
|                | <u>Total</u> | <u>4.336</u> | <u>5.975</u> | <u>3.330</u> | <u>5.342</u> | <u>3.197</u> | <u>5.419</u> | <u>1.924</u> | <u>4.471</u> | <u>-2.542</u> | <u>.011*</u>  |
| CDC CFS        | Psychology   | 3.952        | 3.938        | 2.725        | 5.180        | 1.571        | 3.228        | -.292        | 3.435        | -1.614        | .106          |
| Depression     | Nutrition    | 4.477        | 5.450        | 2.821        | 6.134        | 3.333        | 4.883        | 1.402        | 5.265        | -1.584        | .113          |
|                | Combined     | 5.077        | 5.950        | 3.420        | 6.734        | 2.766        | 3.324        | 1.547        | 3.985        | -1.304        | .192          |
|                | <u>Total</u> | <u>4.544</u> | <u>5.230</u> | <u>3.663</u> | <u>5.424</u> | <u>2.747</u> | <u>3.964</u> | <u>1.815</u> | <u>3.678</u> | <u>-2.297</u> | <u>.022*</u>  |

<sup>a</sup>z-statistic for Wilcoxon Signed-Rank Test

**Table 4. Comparisons across time within the secondary outcome measures (psychological)**

|  | <u>Baseline</u> |           |                        |              | <u>3-month follow-up</u> |           |                        |              | <u>Comparisons</u> |                |
|--|-----------------|-----------|------------------------|--------------|--------------------------|-----------|------------------------|--------------|--------------------|----------------|
|  | <u>Mean</u>     | <u>SD</u> | <u>95% CI for Mean</u> |              | <u>Mean</u>              | <u>SD</u> | <u>95% CI for Mean</u> |              | <u>z-statistic</u> | <u>p-value</u> |
|  |                 |           | <u>Lower</u>           | <u>Upper</u> |                          |           | <u>Lower</u>           | <u>Upper</u> |                    |                |
|  |                 |           |                        |              |                          |           |                        |              |                    |                |

|              |            |        |        |        |         |        |        |        |        |        |         |
|--------------|------------|--------|--------|--------|---------|--------|--------|--------|--------|--------|---------|
| MHLCS        | Psychology | .677   | .159   | .627   | .726    | .821   | .251   | .676   | .966   | -2.983 | .003**  |
| Internal     | Nutrition  | .622   | .177   | .568   | .675    | 1.193  | 2.969  | .019   | 2.368  | -.687  | .492    |
|              | Combined   | .662   | .174   | .613   | .710    | .779   | .318   | .662   | .896   | -1.755 | .079    |
|              | Total      | .653   | .171   | .624   | .682    | .942   | 1.822  | .514   | 1.371  | -2.962 | .003**  |
| MHLCS        | Psychology | .368   | .156   | .320   | .417    | .351   | .152   | .263   | .439   | -2.594 | .009**  |
| Chance       | Nutrition  | .340   | .133   | .299   | .380    | .911   | 3.020  | -.284  | 2.105  | -.143  | .886    |
|              | Combined   | .354   | .155   | .311   | .397    | .314   | .133   | .265   | .363   | -.672  | .501    |
|              | Total      | .354   | .148   | .329   | .379    | .545   | 1.853  | .109   | .980   | -1.552 | .121    |
| MHLCS        | Psychology | .404   | .134   | .362   | .446    | .441   | .315   | .259   | .624   | .000   | 1.000   |
| Powerful     | Nutrition  | .418   | .141   | .374   | .460    | .804   | 2.244  | -.084  | 1.691  | -1.843 | .065    |
| Others       | Combined   | .407   | .101   | .379   | .436    | .434   | .279   | .331   | .536   | -.577  | .564    |
|              | Total      | .409   | .124   | .388   | .430    | .574   | 1.3880 | .248   | .900   | -1.601 | .109    |
| MHLCS        | Psychology | .169   | .082   | .143   | .194    | .131   | .093   | .077   | .185   | -1.122 | .262    |
| Doctors      | Nutrition  | .171   | .089   | .144   | .197    | .657   | 2.668  | -.398  | 1.713  | -1.686 | .092    |
|              | Combined   | .191   | .147   | .150   | .232    | .153   | .070   | .128   | .179   | -1.384 | .166    |
|              | Total      | .178   | .112   | .159   | .196    | .338   | 1.635  | -.0462 | .722   | -2.381 | .017*   |
| MHLCS        | Psychology | .235   | .075   | .212   | .259    | .268   | .189   | .159   | .377   | -.118  | .906    |
| Other People | Nutrition  | .264   | .129   | .225   | .304    | .739   | 2.652  | -.311  | 1.788  | -1.697 | .090    |
|              | Combined   | .245   | .074   | .224   | .265    | .252   | .118   | .209   | .295   | -.213  | .831    |
|              | Total      | .248   | .095   | .232   | .264    | .438   | 1.626  | .055   | .820   | -1.186 | .236    |
| CDC CFS      | Psychology | 94.381 | 16.836 | 89.134 | 99.628  | 78.571 | 18.434 | 67.928 | 89.215 | -3.111 | .002**  |
| Maladaptive  | Nutrition  | 96.386 | 21.946 | 89.714 | 103.059 | 85.259 | 27.665 | 74.315 | 96.203 | -3.443 | .001*** |
| Stress Index | Combined   | 98.269 | 19.165 | 92.934 | 103.605 | 87.484 | 22.965 | 79.060 | 95.908 | -2.215 | .027*   |
| Scale Score  | Total      | 96.486 | 19.373 | 93.225 | 99.747  | 84.917 | 24.004 | 79.276 | 90.557 | -5.123 | .001*** |

<sup>a</sup>z-statistic for Wilcoxon Signed-Rank Test



1  
2  
3  
4  
5  
6  
7  
8  
9  
10  
11  
12  
13  
14  
15  
16  
17  
18  
19  
20  
21  
22  
23  
24  
25  
26  
27  
28  
29  
30  
31  
32  
33  
34  
35  
36  
37  
38  
39  
40  
41  
42  
43  
44  
45  
46  
47  
48  
49



For peer review only



**STROBE 2007 (v4) checklist of items to be included in reports of observational studies in epidemiology\***  
**Checklist for cohort, case-control, and cross-sectional studies (combined)**

| Section/Topic             | Item # | Recommendation                                                                                                                                                                                                                                                                                                                                                                                                                                                         | Reported on page # |
|---------------------------|--------|------------------------------------------------------------------------------------------------------------------------------------------------------------------------------------------------------------------------------------------------------------------------------------------------------------------------------------------------------------------------------------------------------------------------------------------------------------------------|--------------------|
| Title and abstract        | 1      | (a) Indicate the study's design with a commonly used term in the title or the abstract                                                                                                                                                                                                                                                                                                                                                                                 | Title and Abstract |
|                           |        | (b) Provide in the abstract an informative and balanced summary of what was done and what was found                                                                                                                                                                                                                                                                                                                                                                    | Title and Abstract |
| <b>Introduction</b>       |        |                                                                                                                                                                                                                                                                                                                                                                                                                                                                        |                    |
| Background/rationale      | 2      | Explain the scientific background and rationale for the investigation being reported                                                                                                                                                                                                                                                                                                                                                                                   | 1-4                |
| Objectives                | 3      | State specific objectives, including any pre-specified hypotheses                                                                                                                                                                                                                                                                                                                                                                                                      | 3-4                |
| <b>Methods</b>            |        |                                                                                                                                                                                                                                                                                                                                                                                                                                                                        |                    |
| Study design              | 4      | Present key elements of study design early in the paper                                                                                                                                                                                                                                                                                                                                                                                                                | 4                  |
| Setting                   | 5      | Describe the setting, locations, and relevant dates, including periods of recruitment, exposure, follow-up, and data collection                                                                                                                                                                                                                                                                                                                                        | 4                  |
| Participants              | 6      | (a) <i>Cohort study</i> —Give the eligibility criteria, and the sources and methods of selection of participants. Describe methods of follow-up<br><i>Case-control study</i> —Give the eligibility criteria, and the sources and methods of case ascertainment and control selection. Give the rationale for the choice of cases and controls<br><i>Cross-sectional study</i> —Give the eligibility criteria, and the sources and methods of selection of participants | 4                  |
|                           |        | (b) <i>Cohort study</i> —For matched studies, give matching criteria and number of exposed and unexposed<br><i>Case-control study</i> —For matched studies, give matching criteria and the number of controls per case                                                                                                                                                                                                                                                 |                    |
| Variables                 | 7      | Clearly define all outcomes, exposures, predictors, potential confounders, and effect modifiers. Give diagnostic criteria, if applicable                                                                                                                                                                                                                                                                                                                               | 6-7                |
| Data sources/ measurement | 8*     | For each variable of interest, give sources of data and details of methods of assessment (measurement). Describe comparability of assessment methods if there is more than one group                                                                                                                                                                                                                                                                                   | 6-7                |
| Bias                      | 9      | Describe any efforts to address potential sources of bias                                                                                                                                                                                                                                                                                                                                                                                                              | 14                 |
| Study size                | 10     | Explain how the study size was arrived at                                                                                                                                                                                                                                                                                                                                                                                                                              | 8                  |
| Quantitative variables    | 11     | Explain how quantitative variables were handled in the analyses. If applicable, describe which groupings were chosen and why                                                                                                                                                                                                                                                                                                                                           | 7                  |
| Statistical methods       | 12     | (a) Describe all statistical methods, including those used to control for confounding                                                                                                                                                                                                                                                                                                                                                                                  | 7                  |
|                           |        | (b) Describe any methods used to examine subgroups and interactions                                                                                                                                                                                                                                                                                                                                                                                                    | 7                  |
|                           |        | (c) Explain how missing data were addressed                                                                                                                                                                                                                                                                                                                                                                                                                            | 7                  |
|                           |        | (d) <i>Cohort study</i> —If applicable, explain how loss to follow-up was addressed<br><i>Case-control study</i> —If applicable, explain how matching of cases and controls was addressed                                                                                                                                                                                                                                                                              | 9-10               |

|                          |     |                                                                                                                                                                                                                                                                                                                                                                                                               |          |
|--------------------------|-----|---------------------------------------------------------------------------------------------------------------------------------------------------------------------------------------------------------------------------------------------------------------------------------------------------------------------------------------------------------------------------------------------------------------|----------|
|                          |     | <i>Cross-sectional study</i> —If applicable, describe analytical methods taking account of sampling strategy                                                                                                                                                                                                                                                                                                  |          |
|                          |     | (e) Describe any sensitivity analyses                                                                                                                                                                                                                                                                                                                                                                         |          |
| <b>Results</b>           |     |                                                                                                                                                                                                                                                                                                                                                                                                               |          |
| Participants             | 13* | (a) Report numbers of individuals at each stage of study—eg numbers potentially eligible, examined for eligibility, confirmed eligible, included in the study, completing follow-up, and analysed<br>(b) Give reasons for non-participation at each stage<br>(c) Consider use of a flow diagram                                                                                                               | 8-9      |
| Descriptive data         | 14* | (a) Give characteristics of study participants (eg demographic, clinical, social) and information on exposures and potential confounders<br>(b) Indicate number of participants with missing data for each variable of interest<br>(c) <i>Cohort study</i> —Summarise follow-up time (eg, average and total amount)                                                                                           | 8-9<br>9 |
| Outcome data             | 15* | <i>Cohort study</i> —Report numbers of outcome events or summary measures over time<br><i>Case-control study</i> —Report numbers in each exposure category, or summary measures of exposure<br><i>Cross-sectional study</i> —Report numbers of outcome events or summary measures                                                                                                                             | 6-7      |
| Main results             | 16  | (a) Give unadjusted estimates and, if applicable, confounder-adjusted estimates and their precision (eg, 95% confidence interval). Make clear which confounders were adjusted for and why they were included<br>(b) Report category boundaries when continuous variables were categorized<br>(c) If relevant, consider translating estimates of relative risk into absolute risk for a meaningful time period | 10-12    |
| Other analyses           | 17  | Report other analyses done—eg analyses of subgroups and interactions, and sensitivity analyses                                                                                                                                                                                                                                                                                                                |          |
| <b>Discussion</b>        |     |                                                                                                                                                                                                                                                                                                                                                                                                               |          |
| Key results              | 18  | Summarise key results with reference to study objectives                                                                                                                                                                                                                                                                                                                                                      | 12-13    |
| Limitations              | 19  | Discuss limitations of the study, taking into account sources of potential bias or imprecision. Discuss both direction and magnitude of any potential bias                                                                                                                                                                                                                                                    | 14-15    |
| Interpretation           | 20  | Give a cautious overall interpretation of results considering objectives, limitations, multiplicity of analyses, results from similar studies, and other relevant evidence                                                                                                                                                                                                                                    | 13-14    |
| Generalisability         | 21  | Discuss the generalisability (external validity) of the study results                                                                                                                                                                                                                                                                                                                                         | 14-15    |
| <b>Other information</b> |     |                                                                                                                                                                                                                                                                                                                                                                                                               |          |
| Funding                  | 22  | Give the source of funding and the role of the funders for the present study and, if applicable, for the original study on which the present article is based                                                                                                                                                                                                                                                 | 15       |

\*Give information separately for cases and controls in case-control studies and, if applicable, for exposed and unexposed groups in cohort and cross-sectional studies.

**Note:** An Explanation and Elaboration article discusses each checklist item and gives methodological background and published examples of transparent reporting. The STROBE checklist is best used in conjunction with this article (freely available on the Web sites of PLoS Medicine at <http://www.plosmedicine.org/>, Annals of Internal Medicine at <http://www.annals.org/>, and Epidemiology at <http://www.epidem.com/>). Information on the STROBE Initiative is available at [www.strobe-statement.org](http://www.strobe-statement.org).

# Please wait...

If this message is not eventually replaced by the proper contents of the document, your PDF viewer may not be able to display this type of document.

You can upgrade to the latest version of Adobe Reader for Windows®, Mac, or Linux® by visiting [http://www.adobe.com/go/reader\\_download](http://www.adobe.com/go/reader_download).

For more assistance with Adobe Reader visit <http://www.adobe.com/go/acrreader>.

Windows is either a registered trademark or a trademark of Microsoft Corporation in the United States and/or other countries. Mac is a trademark of Apple Inc., registered in the United States and other countries. Linux is the registered trademark of Linus Torvalds in the U.S. and other countries.

# Please wait...

If this message is not eventually replaced by the proper contents of the document, your PDF viewer may not be able to display this type of document.

You can upgrade to the latest version of Adobe Reader for Windows®, Mac, or Linux® by visiting [http://www.adobe.com/go/reader\\_download](http://www.adobe.com/go/reader_download).

For more assistance with Adobe Reader visit <http://www.adobe.com/go/acrreader>.

Windows is either a registered trademark or a trademark of Microsoft Corporation in the United States and/or other countries. Mac is a trademark of Apple Inc., registered in the United States and other countries. Linux is the registered trademark of Linus Torvalds in the U.S. and other countries.



**A preliminary prospective study of nutritional, psychological and combined therapies for Myalgic Encephalomyelitis/Chronic Fatigue Syndrome (ME/CFS) in a private care setting.**

|                                 |                                                                                    |
|---------------------------------|------------------------------------------------------------------------------------|
| Journal:                        | <i>BMJ Open</i>                                                                    |
| Manuscript ID:                  | bmjopen-2012-001079.R3                                                             |
| Article Type:                   | Research                                                                           |
| Date Submitted by the Author:   | 13-Sep-2012                                                                        |
| Complete List of Authors:       | Arroll, Megan; The Optimum Health Clinic, Howard, Alex; The Optimum Health Clinic, |
| <b>Primary Subject Heading</b>: | Complementary medicine                                                             |
| Secondary Subject Heading:      | Rehabilitation medicine, Nutrition and metabolism, Pharmacology and therapeutics   |
| Keywords:                       | COMPLEMENTARY MEDICINE, SOCIAL MEDICINE, REHABILITATION MEDICINE                   |
|                                 |                                                                                    |

SCHOLARONE™  
Manuscripts

## **Abstract**

Background: Myalgic Encephalomyelitis/Chronic Fatigue Syndrome (ME/CFS) is a condition characterized by severe and persistent fatigue, neurological disturbances, autonomic and endocrine dysfunctions and sleep difficulties that have a pronounced and significant impact on individuals' lives. Current NICE guidelines within the United Kingdom suggest that this condition should be treated with cognitive behavioral therapy and/or graded exercise therapy where appropriate. There is currently a lack of evidence base concerning - alternative techniques that may be beneficial to those with ME/CFS. Objectives: This study aimed to investigate whether three modalities of psychology, nutrition and combined treatment, influenced symptom report measures in those with ME/CFS over a 3-month time period and whether there were significant differences in these changes between groups.

Design and setting: This is a preliminary prospective study with one follow-up point conducted at a private secondary health care facility in London, UK.

Participants: One-hundred and thirty-eight individuals (110 females, 79.7%; 42 participants in psychology, 44 in nutrition and 52 in combined) participated at baseline and 72 participants completed the battery of measures at follow-up (52.17% response rate; 14, 27, 31 participants in each group, respectively).

Outcome measures: Self-report measures of ME/CFS symptoms, functional ability, multidimensional fatigue and perceived control.

Results: Baseline comparisons showed those in the combined group had higher levels of fatigue. At follow-up, all groups saw improvements in fatigue, functional physical and symptomatology; those within the psychology group also experienced a shift in perceived control over time.

Conclusions: This study provides early evidence that psychological, nutritional and combined techniques for the treatment of ME/CFS may influence symptomatology, fatigue, function and perceived control. However, these results must be viewed with caution as the allocation

1  
2  
3 to groups was not randomized, there was no control group and the study suffered from high  
4 drop-out rates.  
5  
6  
7

## 8 **Summary**

### 9 **Article focus**

- 10  
11  
12
- 13 • This preliminary prospective study investigated three (psychological, nutritional and  
14 combined) tailored interventions for ME/CFS over time.  
15  
16
  - 17 • Differences between the reported changes over time between groups were also  
18 assessed.  
19  
20

### 21 **Key messages**

- 22  
23
- 24 • Psychological, nutritional and combined approaches for the management of ME/CFS  
25 influence symptomatology over time in some individuals with this disorder.  
26  
27
  - 28 • Self-reported functional ability (physical and social) are influenced following tailored  
29 interventions lasting 3 months.  
30  
31
  - 32 • This study provides preliminary evidence that tailored psychological, nutritional and  
33 combined interventions may influence self-reported symptomatology in some people with  
34 ME/CFS; however due to the study's methodological limitations, it is important that these  
35 findings are investigated further in high quality randomized controlled studies.  
36  
37  
38  
39  
40  
41

### 42 **Strengths and limitations of this study**

- 43  
44
- 45 • The findings here are an initial step to fill the gap in the extant literature regarding the  
46 utility of tailored and multidisciplinary (psychological, nutritional and combined) treatments  
47 for ME/CFS.  
48  
49
  - 50 • There is bias in this study as the participants were self-selected in the sense that they  
51 chose to attend the clinic and which treatment option they preferred (with advice), i.e. the  
52 study was not randomized.  
53  
54  
55  
56  
57  
58  
59  
60



1  
2  
3 • There were low retention rates in this study which may constitute a bias in that those  
4 who remained in the study may have experienced benefits and those who experienced little or  
5 no benefits may have dropped out.  
6  
7  
8  
9  
10  
11  
12  
13  
14  
15  
16  
17  
18

### 19 **Introduction**

20 Chronic Fatigue Syndrome or myalgic encephalomyelitis (ME/CFS) is a condition  
21 characterized by prolonged and debilitating fatigue, although the exact cause of this disorder  
22 is still under debate. Due to the lack of a definitive biological marker, diagnosis is made on  
23 the basis of the exclusion of other explanatory conditions. The most widely used case  
24 definition by the Centers for Disease Control <sup>1</sup> states that there must be at least six months  
25 severe fatigue of new and definite onset, not the result of ongoing exertion, not alleviated by  
26 rest and resulting in reduced levels of physical activity. The CDC definition also sets out a  
27 series of minor complaints that must accompany the fatigue (cognitive impairment, sore  
28 throat, tender cervical or axillary lymph nodes, muscle pain, multi-joint pain, headaches of a  
29 new type, pattern or severity at onset, unrefreshing sleep and post-exertion malaise), with  
30 individuals needing to have the occurrence of four or more symptoms to be diagnosed with  
31 ME/CFS. Estimates of the prevalence of ME/CFS have been made as low as 3 and as high as  
32 2,800 per 100,000 <sup>2</sup>.  
33  
34  
35  
36  
37  
38  
39  
40  
41  
42  
43  
44  
45  
46  
47  
48  
49  
50

51  
52 The most widely researched strategies for alleviating the symptoms of ME/CFS are Cognitive  
53 Behavior Therapy (CBT) and Graded Exercise Therapy (GET). Two reviews of studies on  
54 CBT <sup>3,4</sup> found that it significantly improved physical functioning in adult out-patients as  
55  
56  
57  
58  
59  
60

1  
2  
3 compared with medical management, counseling, guided support, education and support or  
4 relaxation. Regarding GET, a systematic review illustrated that this form of therapy was  
5 potentially beneficial for people with ME/CFS, especially when combined with a patient  
6 education programme<sup>5</sup>. However, drop-out rates were higher in the GET groups than control  
7 groups suggesting that individuals with ME/CFS are averse to this type of therapy. Recently,  
8 a large scale, longitudinal study investigating CBT, GET, Adaptive Pacing Therapy (APT)  
9 and specialist medical care (SMC) which had very low drop-out rates, found that CBT and  
10 GET (when added to SMC) were moderately effective outpatient treatments for this patient  
11 group as opposed to APT or SMC alone<sup>6</sup>.  
12  
13  
14  
15  
16  
17  
18  
19  
20  
21  
22  
23  
24

25 Although CBT and GET studies have shown some promising outcomes, there is no known  
26 cure for ME/CFS. Therefore the National Institute for Health and Clinical Excellence (NICE)  
27  
28  
29  
30  
31  
32  
33  
34  
35  
36  
37  
38  
39  
40  
41  
42  
43  
44  
45  
46  
47  
48  
49  
50  
51  
52  
53  
54  
55  
56  
57  
58  
59  
60  
<sup>7</sup> recommends a number of symptom management strategies and interventions aimed at  
helping individuals to cope with their condition and reduce physical deconditioning brought  
about by the illness. Pharmacological interventions are, at times, suggested for patients with  
poor sleep or pain, for instance, low-dose antidepressants, as these have been shown to be  
effective<sup>8-14</sup>. However, patient expectations must be realistic as the drugs may help elevate  
mood and psychological outlook but not reduce fatigue and other symptomatology associated  
with ME/CFS<sup>15</sup>. Numerous drugs such as thyroxine, hydrocortisone and antiviral agents are  
not advised by NICE due to contradictory findings<sup>16;17</sup>.

In terms of function and quality of life management, NICE offers general advice concerning  
sleep management, appropriate rest periods, and pacing. Sleep hygiene instruction, together  
with pharmacological treatment tailored to the individual patient can be beneficial in  
combating fatigue<sup>18</sup>. Dietary management may also reduce symptomatology for those with

1  
2  
3 concurrent irritable bowel syndrome (IBS) <sup>19</sup>, although this is not currently recommended by  
4 NICE. Dietary supplementation has been investigated in relation to ME/CFS. Fatty acids <sup>20</sup>,  
5 folic acid <sup>21</sup>, vitamin C <sup>22</sup>, co-enzyme Q10 <sup>23</sup>, magnesium <sup>24</sup>, multivitamins <sup>25</sup> and minerals <sup>26</sup>  
6  
7 have all been shown to reduce symptomatology in ME/CFS patients. However other studies  
8  
9 have shown conflicting findings with regard to nutritional supplementation, therefore it is  
10  
11 perhaps wise to treat with supplements on a case-by-case basis <sup>27;28</sup>.  
12  
13  
14  
15  
16  
17

18  
19 Due to the lack of clear and definitive treatment strategies, individuals often seek out  
20 Complementary and Alternative Medicines (CAM). Although NICE does not recommend the  
21 use of CAM they do acknowledge that many people with ME/CFS use such therapies and  
22 find them beneficial for symptom management. This view is due to the lack of published  
23 evidence for the effectiveness of these treatments. Examples of CAM treatments used by  
24 individuals with ME/CFS include religious healing, massage therapy, relaxation, meditation,  
25 homeopathy, acupuncture, naturopathy and herbal therapies <sup>29;30</sup>; patient satisfaction with  
26 such approaches as CAM has been high, over 80% in some instances <sup>29</sup>. A recent systematic  
27 review of such interventions identified 70 controlled clinical trials (randomized and non-  
28 randomized) and found that 86% of these studies illustrated at least one positive effect, with  
29 74% showing a decrease of illness-related symptomatology <sup>31</sup>. Meditative or mindfulness  
30 approaches warranted further investigation based on these results as did supplement programs  
31 of magnesium, l-carnitine, and S-adenosylmethionine. A subsequent review based solely on  
32 randomized controlled trials (RCTs) of CAM techniques identified 26 such studies and  
33 observed that qigong, massage and tuina (approaches based within Chinese Traditional  
34 Medicine and based upon relaxation and connection with the body) illustrated positive effects  
35 as did supplementation studies utilizing nicotinamide adenine dinucleotide (NADH) and  
36 magnesium <sup>32</sup>. However, within both reviews it was noted that the methodological quality of  
37  
38  
39  
40  
41  
42  
43  
44  
45  
46  
47  
48  
49  
50  
51  
52  
53  
54  
55  
56  
57  
58  
59  
60

1  
2  
3 reporting was poor and the sample sizes in these studies were small; hence ability to draw  
4  
5 strong conclusions on the efficacy of CAM methods is limited. Porter et al. (2010)<sup>31</sup> did note  
6  
7 that individualized treatment protocols which include a range of tailored strategies are a  
8  
9 promising area for further investigation for this complex, multi-system illness.  
10  
11

## 12 13 14 15 16 17 18 **Objectives**

19  
20 There is still much debate and uncertainty regarding alternative interventions for those with  
21  
22 ME/CFS. A recent review of CAM techniques<sup>31</sup> highlight the need for further exploration of  
23  
24 individually tailored interventions for the alleviation of the condition's often debilitating and  
25  
26 intrusive symptomatology. This study therefore aims to provide preliminary evidence for the  
27  
28 utility of three types of approaches (psychological, nutritional and combined) to the  
29  
30 management of ME/CFS over time (baseline and follow-up) offered at a private health-care  
31  
32 center in the UK.  
33  
34  
35  
36  
37

## 38 **Methods**

### 39 **Study design and setting**

40  
41 This preliminary prospective study aimed to investigate whether psychological, nutritional  
42  
43 and combined approaches to the treatment of ME/CFS influenced symptom report measures  
44  
45 over a 3-month time period and whether there were significant differences in these changes  
46  
47 between groups. The research was conducted at one private secondary health care facility. All  
48  
49 potential patients of the clinic are first asked to complete a comprehensive symptom profile  
50  
51 and medical history, including questions relating to triggering factors, psychology sub-types  
52  
53 and structural/biological sub-types (this is distinct from the research data collected).  
54  
55  
56  
57  
58  
59  
60

1  
2  
3 Subsequent to this, every individual receives a 15-minute screening with one of the  
4 practitioners (please note, this was not either of the authors of the current study) who  
5 recommends the best course of action for his/her needs; this will be the psychology-related  
6 interventions, nutritional advice and support or a combination of the two.  
7  
8  
9  
10

11  
12  
13  
14 All individuals requesting treatment at the private care setting were offered the opportunity to  
15 participate in the study. Those that expressed an interest (N = 145) were emailed a  
16 spreadsheet that contained the questionnaires and asked to complete it at their convenience.  
17  
18 Informed consent was obtained prior to the completion of the questionnaires and the study  
19 was approved by the University of East London Ethics Committee. Participants were told that  
20 they could withdraw from the study at any time and that withdrawal would not affect their  
21 care at the clinic. Participants were able to ask questions at any point in the study and no  
22 deception was used as the participants were informed of the nature of the research program  
23 before they agreed to participate. Subsequently, participants were requested to complete the  
24 questionnaire pack on a second occasion, three months from the baseline measures.  
25  
26  
27  
28  
29  
30  
31  
32  
33  
34  
35  
36  
37

### 38 *Psychology*

39  
40 The clinic offers a 3-month intervention which consists of a combination of Neuro-linguistic  
41 Programming (NLP), Emotional Freedom Technique (EFT), life coaching and  
42 hypnotherapy/self-hypnosis constructed in a manner specific to the needs of those with  
43 ME/CFS. The primary aim of this approach is to reduce the anxiety that is associated with  
44 having a debilitating and unpredictable condition, improve emotional well-being and help  
45 individuals slowly manage and increase their activity within their own limits (i.e. pacing).  
46  
47 The program is offered as a series of group sessions and the peer support is seen as an  
48 important component of the intervention, which is solidified via the use of moderated online  
49  
50  
51  
52  
53  
54  
55  
56  
57  
58  
59  
60

1  
2  
3 support forums, narratives of previous clients' experiences and online materials that can be  
4  
5 accessed as often as necessary. In addition to, or as an alternative to this course, individuals  
6  
7 receive a series of one-to-one sessions and for the most severely affected ME/CFS patients,  
8  
9 telephone sessions are arranged and support materials can be accessed in their own homes.  
10

11 Over the three-month period of this preliminary study, the participants experienced one of  
12  
13 three treatment options. The first option included 13 hours of practitioner contact time in a  
14  
15 mix of group training in person, group telephone conference calls and one-to-one telephone  
16  
17 sessions, the second option was four hours of one-to-one telephone sessions and the final  
18  
19 option was three hours of in person sessions. Participants all had access to various support  
20  
21 materials which included CDs and online resources. The amount of time spent on these was  
22  
23 patient-led, but was in the region of a further six hours. All the practitioners offering this  
24  
25 option are qualified in hypnotherapy, NLP, life coaching and EFT and undergo an intensive  
26  
27 period of training in the clinic's own integrative approach (please see Howard and Arroll <sup>33</sup>  
28  
29 for more details of this approach) and ongoing supervision (individual and group supervision  
30  
31 on a biweekly basis) from the department director, who is the only senior practitioner in the  
32  
33 team.  
34  
35  
36  
37  
38  
39

#### 40 *Nutrition*

41  
42 Tailored nutritional therapy is achieved via one-to-one consultations with individuals. To  
43  
44 begin, a very detailed history is taken based upon the information given in the  
45  
46 aforementioned symptom profile. Qualified nutritional therapists (who have been given  
47  
48 specialist training regarding ME/CFS from the clinic) then suggest tests consistent with  
49  
50 symptomatology, for instance the Adrenal Stress Index Test, comprehensive stool  
51  
52 analysis/gastro-intestinal function, vitamin & mineral status, etc. Results from these tests are  
53  
54 then used to compose an evidence-driven diet and supplement program. As most cases of  
55  
56  
57  
58  
59  
60

1  
2  
3 ME/CFS are complex involving multiple body systems, this process is often iterative and  
4  
5 follow-up consultations are necessary to check progress and make alterations to the protocol.  
6  
7 The nutritional therapy program consists of an initial one-hour evaluation (which includes the  
8  
9 tailored advice) and follow-up approximately every six weeks; therefore, during the course  
10  
11 of the present study, the participants received a minimum of two one-hour sessions with  
12  
13 email support for any queries and detailed nutritional guidance. All the nutritional therapists  
14  
15 are qualified to diploma level and members of (voluntary) regulatory bodies such as the  
16  
17 British Association for Applied Nutrition and Nutritional Therapy (BANT) and the  
18  
19 Complementary and Natural Healthcare Council (CNHC). Similar to the psychology  
20  
21 department, the nutrition department is led by one senior practitioner who supervises the team  
22  
23 with individual and group supervisory arrangements.  
24  
25  
26  
27  
28

### 29 *Combined*

30  
31 Within the combined program, a multidisciplinary approach is taken with practitioners  
32  
33 discussing the patients in case meetings to ensure that the psychological and nutritional  
34  
35 aspects complement each other in order to achieve the best outcome. It should be noted that  
36  
37 the interventions in the combined program are phased-in as it was found that asking  
38  
39 individuals to engage in numerous therapeutic activities at the same time resulted in high  
40  
41 drop-out rates.  
42  
43  
44  
45  
46

### 47 **Primary Outcome Measures**

#### 48 *Medical Outcomes Survey Short-Form 36 (SF-36)*

49  
50 This 36-item measure is the short form of the original Medical Outcomes Survey <sup>34</sup> to  
51  
52 measure functional impairment and contains eight sub-sections: 1) physical activity  
53  
54 limitations due to health problems; 2) social activity limitations due to physical or emotional  
55  
56  
57  
58  
59  
60

1  
2  
3 problems; 3) usual role activity limitations due to physical health problems; 4) bodily pain; 5)  
4  
5 general mental health; 6) role activity limitations due to emotional problems; 7) vitality  
6  
7 (energy and fatigue); and 8) general health perceptions<sup>34</sup>. The items are scored so that higher  
8  
9 scores indicate greater functional ability. In terms of the psychometric properties of this  
10  
11 measure, reliability estimates for all sub-scales are good, exceeding a Cronbach's alpha  
12  
13 coefficient value of 0.70<sup>35</sup>. In terms of validity, the SF-36 correlates amply,  $r \geq 0.40$ , with the  
14  
15 frequency and severity of numerous symptoms and general health conditions<sup>36,37</sup>.

### 20 21 *Multidimensional Fatigue Inventory (MFI)*

22  
23 This 20-item measure contains five fatigue dimensions: general fatigue, physical fatigue,  
24  
25 mental fatigue, reduced motivation and reduced activity<sup>38</sup>. Items such as 'I tire easily' are  
26  
27 rated on a 5-point scale (1 = yes, that is true; 5 = no, that is not true) with lower scores  
28  
29 reflecting higher levels of fatigue. The MFI has good internal consistency with average  
30  
31 Cronbach's alpha coefficient equaling 0.84 across the sub-scales. Convergent validity based  
32  
33 on a sample of radiotherapy patients found correlations between the sub-scales and a visual  
34  
35 analog fatigue scale to be 0.77 for general fatigue, 0.70 for physical fatigue, 0.61 for reduced  
36  
37 activity, 0.56 for reduced motivation ( $p < 0.001$ ) to 0.23 for mental fatigue ( $p < 0.01$ )<sup>38</sup>.

### 42 43 **Secondary Outcome Measures**

#### 44 45 *CDC CFS Symptom Inventory*

46  
47 CDC CFS Symptom Inventory<sup>39</sup> was used to measure specific ME/CFS symptoms and  
48  
49 confirm diagnosis. This instrument is based upon the CDC case definition<sup>1</sup> and includes a  
50  
51 fatigue item and the eight distinct symptoms are also included in the CDC guidelines with an  
52  
53 additional ten associated symptoms. The format of this self-report measure is a six-point scale  
54  
55 of perceived frequency (0 = absent, 5 = all the time) and severity (0 = none, 5 = very severe).



1  
2  
3 The psychometric properties of this instrument are good: Cronbach's alpha coefficient = 0.88;  
4  
5  $r = .74$  convergent validity with the Chalder Fatigue Scale <sup>40</sup>;  $r = -.68$  and  $-.87$  convergent  
6  
7 validity with the SF-36 'vitality' and 'bodily pain' sub-scales, respectively.  
8  
9

### 10 11 *Multidimensional Health Locus of Control Scale (MHLCS)*

12  
13  
14 Multidimensional Health Locus of Control <sup>41-43</sup> measures perceived control via three distinct  
15  
16 sub-scales: 'internal', 'chance' and 'powerful others' which has two dimensions, that of  
17  
18 'doctors' and 'other people'. The instrument contains 18 items in total (six items each for the  
19  
20 'internal' and 'chance' scales and three items for both the 'powerful others' scales) and is  
21  
22 scored on a 6-point Likert scale from 'strongly agree' to 'strongly disagree'. Internal  
23  
24 reliability of the instrument is good with Cronbach's alpha coefficients ranging from 0.67 for  
25  
26 'powerful others' to 0.77 for 'internal'. The measure correlates positively and significantly  
27  
28 with associated scales from Levenson's <sup>44</sup> locus of control measure from which the MHLOC  
29  
30 was based, which demonstrates good convergent validity <sup>41</sup>.  
31  
32  
33  
34  
35  
36  
37  
38  
39

### 40 **Statistical methods**

41 The data was initially screened for missing data. Four cases contained substantial amounts of  
42  
43 missing data; therefore these were excluded from the analysis (one individual from the  
44  
45 nutrition group and three from the combined group). Subsequent analyses were conducted on  
46  
47 complete data only. . The baseline data was subsequently of the quality for parametric tests,  
48  
49 except for the variables CDC CFS swollen lymph nodes and glands, memory problems,  
50  
51 abdominal pain and depression. However, the follow-up data suffered from high levels of  
52  
53 skew and kurtosis which was not substantially alleviated by data transformation. This  
54  
55 violated a key criterion for parametric testing, that of normality of distribution, so non-  
56  
57  
58  
59  
60

1  
2  
3 parametric tests were selected. In addition, as the sample sizes in each individual treatment  
4  
5 group were small, the more conservative non-parametric tests were the preferred choice as  
6  
7 even though tests such as analysis of variance are generally robust against non-normality, this  
8  
9 does not hold true with small sample sizes. One-way analysis of variance tests and Kruskal-  
10  
11 Wallis tests (the former for those variables that met the criteria for parametric tests, and the  
12  
13 latter that did not) were used to investigate baseline variation and analysis of covariance  
14  
15 (ANCOVA) tests were used to account for this variation and test to for differences between  
16  
17 the three groups. Wilcoxon sign-rank tests were employed to look for differences over time  
18  
19 (baseline and 3-month follow-up) and if differences were significant, percentage change was  
20  
21 calculated. Please note, as this is an exploratory study with only one time-point and no  
22  
23 control group, any significant findings do not infer clinical significance, rather statistical  
24  
25 significance, and as such exact p-values are presented.  
26  
27  
28  
29  
30  
31

## 32 **Results**

### 33 **Participants**

34  
35 Of the 145 individuals who expressed an interest in the study, 142 time-one questionnaires  
36  
37 were returned, equating to a 97.9% response rate at baseline (two participants from the  
38  
39 psychology group and one from the combined group dropped out at this stage). Therefore,  
40  
41 excluding the four cases deleted due to insufficient data, 138 cases were used for baseline  
42  
43 analysis; 42 participants in the psychology group, 44 in the nutrition group and 52 in the  
44  
45 combined group. There was no significant association between gender and group ( $\chi^2 (2) =$   
46  
47  $0.179, p = .915$ ), all groups consisting of approximately one-fifth males (Table 1). There was  
48  
49 not a significant difference in age ( $F(2,135) = 0.001, p = 1.000$ ); in fact group means for age  
50  
51 were near identical at 42.881, 42.864 and 42.843 for psychology, nutrition and combined  
52  
53 groups, respectively. There was also a non-significant result for illness duration ( $F(2, 135) =$   
54  
55  
56  
57  
58  
59  
60

0.252,  $p = .778$ ). Therefore, in terms of demographics, the groups were comparable. With regard to the outcome measures, there were significant differences between the groups in terms of the MFI sub-scale 'general fatigue' ( $F(2, 135) = 3.219, p = .043$ ), MFI 'physical fatigue' ( $F(2, 135) = 3.343, p = .038$ ) and the CDC CFS symptom 'swollen lymph nodes and glands' ( $H(2) = 7.161, p = .028$ ). To investigate the source of these differences, post-hoc tests were conducted (unrelated t-tests for the fatigue variables and Mann-Whitney tests for swollen lymph glands as the former did not meet criteria for parametric tests, all with Bonferroni correction for multiple comparisons). A significant difference was observed between the psychology and combined groups with regards to general fatigue ( $t(92) = -2.449, p = .016$ ) and physical fatigue ( $t(92) = -2.658, p = .009$ ) and also between the nutrition and psychology group in terms of the degree of lymph node and gland swelling ( $U = 635.00, p = .009$ ). Within the fatigue measures, the combined group reported significantly higher levels of both general and physical fatigued than the psychology group whereas those undertaking nutritional support stated a higher occurrence of swollen lymph nodes and glands.

### *Retention analysis*

Seventy-two of the original 138 participants (14 participants in the psychology group, 27 in the nutrition group and 31 in the combined group) completed the battery of measures at the 3-month follow-up, resulting in retention rates of 52.17% in the study overall, 33.33% in the psychology group, 61.36% in the nutrition group and 59.62% in the combined group. To investigate whether the individuals who did not complete the time-two measures were significantly different from those at baseline on demographic and outcome measures, a series of t-tests and Mann-Whitney tests were performed. Those that dropped out of the research (although still receiving treatment at the clinic) differed significantly in terms of age ( $t(136) = -2.227, p = .028$ ) and illness duration ( $t(136) = -2.549, p = .012$ ). Those who remained in the

1  
2  
3 study were of significantly older age (mean age of those that remained in the study = 45.056,  
4 SD = 11.535; mean age of drop-outs = 40.400, SD =12.932) and longer illness duration than  
5 those who dropped out (mean age of those that remained in the study = 10.836, SD = 7.383;  
6 mean illness duration of drop-outs =7.571, SD = 7.472). Individuals who did not remain in  
7 the study did not differ significantly in terms of gender ( $\chi^2 (2) = 1.222, p = .269$ ) or any of the  
8 outcome measures.  
9  
10  
11  
12  
13  
14  
15  
16  
17  
18

### 19 **Comparisons within-groups across time**

#### 20 **Overall sample**

##### 21 *Primary outcomes*

22  
23 The following percentage change scores represent statistically significant changes, rather than  
24 clinically significant shifts, as this was an exploratory study. In the sample as a whole, there  
25 were improvements in all areas of the SF-36 (Table 2), with a 5.80% improvement in  
26 physical functioning, a 68.98% improvement in role limitations due to physical difficulties, a  
27 5.17% improvement in bodily pain, a 26.17% improvement in social functioning, a 5.77%  
28 improvement in general mental health, a 10.58% improvement in role limitations due to  
29 emotional difficulties, a 22.30% improvement in vitality, energy or fatigue and a 36.49%  
30 improvement in general health perception. When looking at the fatigue sub-scales of the MFI,  
31 all five sub-scales showed significant reductions in fatigue; 8.55% in general fatigue, 10.98%  
32 in physical fatigue, 8.81% in reduced activity, 12.96% in reduced motivation and 12.79% in  
33 mental fatigue.  
34  
35  
36  
37  
38  
39  
40  
41  
42  
43  
44  
45  
46  
47  
48  
49  
50

##### 51 *Secondary outcomes*

52  
53 Within the CFS Symptom Inventory (Table 3), there were improvements in occurrence of  
54 sore throats (34.48%), diarrhea (42.47%), fatigue after exertion (16.32%), muscle aches or  
55  
56  
57  
58  
59  
60

1  
2  
3 muscle pains (21.01%), pain in joints (34.55%) chills (37.00%), unrefreshing sleep (19.55%),  
4  
5 sleeping problems (17.17%), headaches (24.94%), memory problems (17.86%), difficulty  
6  
7 concentrating (26.66%), sinus and nasal symptoms (26.38%), shortness of breath (29.28%),  
8  
9 sensitivity to light (28.62%) and depression (39.55%). There were no significant differences  
10  
11 from time-one to time-two in the MHLCS sub-scale of 'chance', 'powerful others' and 'other  
12  
13 people' (Table 3), however the MHLCS did illustrate significant increases in internal locus of  
14  
15 control (30.67%) and that of doctors (47.49%).  
16  
17  
18  
19

## 20 21 **Psychology group**

### 22 *Primary outcomes*

23  
24 Within the group of individuals who opted for a purely psychological intervention,  
25  
26 improvements were seen in physical functioning (16.75%), role limitations due to physical  
27  
28 problems (84.61%), social functioning (37.81%), general mental health (19.15%), vitality,  
29  
30 energy or fatigue (49.57%) and general health perceptions (19.01%). Also, all the MFI  
31  
32 fatigue scales decreased over a 3-month period, 13.58% in general fatigue, 17.74% in  
33  
34 physical fatigue, 23.20% in reduced activity, 11.42% in reduced motivation and 29.66% in  
35  
36 mental fatigue (Table 4).  
37  
38  
39

### 40 *Secondary outcomes*

41  
42 Within those taking part in the psychology intervention, ratings of muscle aches or muscle  
43  
44 pains (10.34%), chills (23.40%), memory problems (44.73%), difficulty concentrating  
45  
46 (39.50%) and sensitivity to light (64.58%) decreased (Table 5). A significant increase of  
47  
48 17.56% was observed in internal locus of control, a decrease of 4.67% in the perception that  
49  
50 chance played an influential part in the individuals' lives (Table 5).  
51  
52  
53  
54

## 55 56 **Nutrition group**

### *Primary outcomes*

The nutrition group saw improvements in role limitations due to physical problems (75.28%), social functioning (24.93%), vitality, energy or fatigue (35.35%), and general health perceptions (29.73%). Once again, all the MFI fatigue scales decreased over a 3-month period, 13.39% in general fatigue, 15.00% in physical fatigue, 13.28% in reduced activity, 14.64% in reduced motivation and 12.83% in mental fatigue (Table 6).

### *Secondary outcomes*

In the nutrition group, numerous symptom-related indices also showed improvements (Table 7); sore throat (56.23%), swollen lymph glands (21.21%), fatigue after exertion (13.90%), muscle aches or muscle pains (20.56%), chills (40.74%), nausea (16.42%) and abdominal pain (20.16%). No significant differences were found from baseline to follow-up in perceived control (Table 7).

## **Combined group**

### *Primary outcomes*

In terms of general health as gauged by the SF-36 measure, the group who received both psychological and nutritional intervention reported reductions in role limitations due to physical difficulties (57.02%), social functioning (22.61%), role limitations due to emotional difficulties (29.47%) and general health perceptions (26.45%). Only one measure of fatigue, that of physical fatigue, saw significant improvements over time (6.42%) in the combined group (Table 8).

### *Secondary outcomes*

Those in the combined group saw significant reductions over the 3-month interval in diarrhea (47.97%), fatigue after exertion (19.20%), chills (40.23%), headaches (36.18%) and sinus and nasal symptoms (20.56%) (Table 9). No significant differences were found from baseline to

1  
2  
3 follow-up in perceived control as measured by the MHLCS in the combined treatment group  
4  
5 (Table 9).  
6  
7  
8  
9  
10  
11  
12  
13  
14  
15  
16  
17  
18

### 19 **Comparisons across groups**

20 With correction for baseline variation, there were no significant differences between the three  
21 groups in terms of change scores.  
22  
23  
24  
25  
26

## 27 **Discussion**

### 28 **Key results**

29  
30  
31 There was statistically significant (rather than known clinically significant) change over time  
32 of numerous measures in all groups investigated. However, this is not to say that these  
33 changes were due to the interventions as the design of this study was exploratory, rather than  
34 experimental (please see below for a further critique of the design). The psychology group  
35 contained the most significant findings, including those concerned with daily functioning,  
36 fatigue, locus of control and cognitive CDC CFS specific symptoms. These findings appear  
37 consistent with outcomes from other psychological interventions<sup>3;4;6</sup>. As expected, changes in  
38 perceived control were not observed in the nutrition group as this is not an area that is  
39 targeted in this program. However, the more immune-type symptoms such as sore throat and  
40 swollen lymph nodes or glands did see significant reductions over time as would be  
41 envisaged in treatment protocols based upon nutritional expertise. The group that exhibited  
42 the least significant findings was the combined group and, as noted below, this may be due to  
43  
44  
45  
46  
47  
48  
49  
50  
51  
52  
53  
54  
55  
56  
57  
58  
59  
60

1  
2  
3 the greater general severity of symptoms in this group and the need for a more lengthy  
4  
5 intervention. Nevertheless, considering the small sample sizes in the groups at follow-up,  
6  
7 these results are very promising and warrant further attention.  
8  
9

### 10 11 **Interpretation**

12  
13 As noted previously<sup>31</sup> individualized treatment protocols which include a range of tailored  
14  
15 strategies is a favorable direction for dealing with a complex and multi-system disorder such  
16  
17 as ME/CFS. The present study has demonstrated that such interventions may be useful in  
18  
19 lowering symptomatology, improving functioning and helping individuals gain a greater  
20  
21 sense of control over their health status.  
22  
23  
24

### 25 26 27 **Limitations and Generalisability**

28  
29 This study was a preliminary study in a naturalistic setting and as such did not have a robust  
30  
31 design. There was not a control group and the participants were not randomly assigned to  
32  
33 groups, therefore the results should be treated with caution. In order to ascertain whether the  
34  
35 changes in symptom and functional reports were due to the interventions, a randomized  
36  
37 control trial should be conducted (RCT). Also, there was a high drop-out rate from time-one  
38  
39 to time-two and this rate differed across groups. The highest drop-out rate was in the  
40  
41 psychology group; whilst we cannot be sure why this occurred, it is postulated that the  
42  
43 retention was poor in the group as the individuals in the psychology program had more  
44  
45 activities to engage in and may have felt overburdened with the research questionnaires in  
46  
47 addition to their session and homework (this would not be the case in the combined group as  
48  
49 the therapeutic activities are phased-in as mentioned above).  
50  
51  
52  
53  
54  
55  
56  
57  
58  
59  
60



1  
2  
3 In this study, each individual was guided to appropriate treatment within an initial screening  
4 with clinic staff; therefore the group was dependent on the nature of the individual's  
5 symptoms and their personal choice as the programs on offer were privately funded. Notably,  
6 the groups did differ in general and physical fatigue with participants in the combined groups  
7 reporting greater fatigue than those in the psychology group which suggests that this group's  
8 general symptomatology was more severe. The combined group illustrated less change over  
9 time compared to the psychology and nutrition groups and it is feasible to infer that  
10 individuals with a greater number and degree of complaints are referred to the combined  
11 group within the clinic. Also, those in the combined group will not experience the intensity of  
12 each intervention as this has been demonstrated to result in non-compliance; therefore,  
13 changes in outcome measures in this group may not be noted at an interval of three months.  
14 Further studies underway presently will investigate follow-ups at 6- and 12-months to  
15 identify whether the findings here are maintained over time and also whether those with  
16 greater symptom severity benefit with a longer intervention. The results from this study will  
17 then inform plans for an RCT of the clinic's practices. As the participants were self-selected  
18 onto these programs, the findings lack generalizability; future work should sample from the  
19 overall ME/CFS population and be randomly-assigned to groups in order to make valid  
20 assumptions regarding the illness-group as a whole.  
21  
22  
23  
24  
25  
26  
27  
28  
29  
30  
31  
32  
33  
34  
35  
36  
37  
38  
39  
40  
41  
42  
43  
44

### 45 **Funding**

46 No external funding was obtained for this research; the work was accomplished in-house at  
47 the clinic in question.  
48  
49  
50  
51  
52  
53  
54  
55  
56  
57  
58  
59  
60

### **Data Sharing**

Dataset available from the corresponding author at drarroll@theoptimumhealthclinic.com.

Consent was not obtained for data sharing but the presented data are anonymised and risk of identification is low.

### **Contributorship**

Alex Howard made substantial contributions to the conception and design and acquisition of data, whilst Megan Arroll made a substantial contribution to the analysis and interpretation of data. Both authors made a substantial contribution to the drafting of the article and revisions for the critical review of important intellectual content. Final approval of the version to be published was also granted by both authors.

### **Acknowledgements**

We would like to thank Dr Tomas Ros for preparing the questionnaire spreadsheet, Niki Gratrix for helping in setting-up the study and Dr Andy McLellan and Val Duschinsky for proof-reading and editing.

### **Competing Interests**

Alex Howard is the founder and CEO of The Optimum Health Clinic and Megan Arroll is the Director of Research at the Optimum Health Clinic, where this study was conducted.

1  
2  
3 List of abbreviations

4  
5 ME: myalgic encephalomyelitis

6  
7 CFS: Chronic Fatigue Syndrome

8  
9 NICE: National Institute for Health and Clinical Excellence

10  
11 CBT: Cognitive Behavioral Therapy

12  
13 GET: Graded Exercise Therapy

14  
15 APT: Adaptive Pacing Therapy

16  
17 SMC: specialist medical care

18  
19 CAM: Complementary and Alternative Medicine

20  
21 NLP: Neuro-linguistic Programming

22  
23 EFT: Emotional Freedom Technique

24  
25 SF-36: Medical Outcomes Survey Short-Form 36

26  
27 MHLCS: Multidimensional Health Locus of Control Scale

28  
29 MFI: Multidimensional Fatigue Inventory

30  
31 RCT: randomized controlled trial

32  
33  
34  
35  
36 Reference List

37  
38  
39  
40 (1) Fukuda K, Straus SE, Hickie I, et al. The chronic fatigue syndrome: A comprehensive  
41 approach to its definition and study. *Annals of Internal Medicine* 1994; 121:953-959.

42  
43 (2) Jason LAE, Fennell PAE, Taylor RRE. Handbook of chronic fatigue syndrome. 2003.

44  
45 (3) Price JR, Couper J. Cognitive behaviour therapy for chronic fatigue syndrome in  
46 adults. *The Cochrane Database of Systematic Reviews* 1998; 4:1-38.

47  
48 (4) Price JR, Mitchell E, Tidy E, et al. Cognitive behaviour therapy for chronic fatigue  
49 syndrome in adults. *Cochrane Database of Systematic Reviews* 2008;(Issue 3).

50  
51 (5) Edmonds M, McGuire H, Price J. Exercise therapy for chronic fatigue syndrome. *The  
52 Cochrane Database of Systematic Reviews* 2004; 3:1-25.  
53  
54  
55  
56  
57  
58  
59  
60

1  
2  
3 (6) White PD, Goldsmith AL, Johnson AL, et al. Comparison of adaptive pacing therapy,  
4 cognitive behaviour therapy, graded exercises therapy, and specialist medical care for chronic  
5 fatigue syndrome (PACE): a randomised trial. *Lancet* 2011; 377(9768):823-836.  
6

7 (7) National Institute for Health and Clinical Excellence. Chronic fatigue  
8 syndrome/myalgic encephalomyelitis (or encephalopathy): Diagnosis and management of  
9 CFS/ME in adults and children. London: NICE; 2007.  
10

11 (8) Wearden AJ, Morriss RK, Mullis R, et al. Randomised, double-blind, placebo-  
12 controlled treatment trial of fluoxetine and graded exercise for chronic fatigue syndrome.  
13 *British Journal of Psychiatry* 1998; 172(6):485-490.  
14

15 (9) Vercoulen JH, Swanink CM, Zitman FG, et al. Randomised, double-blind, placebo-  
16 controlled study of fluoxetine in chronic fatigue syndrome. *Lancet* 1996; 347(9005):858-861.  
17  
18

19 (10) Goodnick PJ, Jorge CM. Treatment of chronic fatigue syndrome with nefazodone.  
20 *American Journal of Psychiatry* 1999; 156(5):797-798.  
21

22 (11) Goodnick PJ. Treatment of chronic fatigue syndrome with venlafaxine. *American*  
23 *Journal of Psychiatry* 1996; 153(2):294.  
24

25 (12) Goodnick PJ, Sandoval R. Psychotropic treatment of chronic fatigue syndrome and  
26 related disorders. *Journal of Clinical Psychiatry* 1993; 54(1):13-20.  
27

28 (13) Goodnick PJ, Sandoval R, Brickman A, et al. Bupropion treatment of fluoxetine-  
29 resistant chronic fatigue syndrome. *Biological Psychiatry* 1992; 32(9):834-838.  
30

31 (14) Hickie I. Nefazodone for patients with chronic fatigue syndrome. *Australian and New*  
32 *Zealand Journal of Psychiatry* 1999; 33(2):278-280.  
33

34 (15) Levine P, Schwartz S, Furst G. Medical intervention and management. 2003.  
35  
36

37 (16) Afari N, Buchwald D. Chronic fatigue syndrome: A review. *American Journal of*  
38 *Psychiatry* 2003; 160(2):221-236.  
39

40 (17) Reid S, Chalder T, Cleare A, et al. Extracts from "Clinical Evidence": Chronic fatigue  
41 syndrome. *British Medical Journal* 2000; 320:292-296.  
42

43 (18) Lange G, Cook DB, Natelson BH. Rehabilitation and Treatment of Fatigue. 2005.  
44

45 (19) Jones J, Boorman J, Cann P, et al. British Society of Gastroenterology guidelines for  
46 the management of the irritable bowel syndrome. *Gut* 2000; 47((Suppl II)):ii1-ii19.  
47

48 (20) Warren G, McKendrick M, Peet M. The role of essential fatty acids in chronic fatigue  
49 syndrome: A case-controlled study of red-cell membrane essential fatty acids (EFA) and a  
50 placebo-controlled treatment study with high dose of EFA. *Acta Neurologica Scandinavica*  
51 1999; 99(2):112-116.  
52

53 (21) Kaslow JE, Rucker L, Onishi R. Liver extract-folic acid-cyanocobalamin vs placebo  
54 for chronic fatigue syndrome. *Archives of Internal Medicine* 1989; 149(11):2501-2503.  
55  
56  
57  
58  
59  
60

1  
2  
3 (22) Kodama M, Kodama T, Murakami M. The value of the dehydroepiandrosterone-  
4 annexed vitamin C infusion treatment in the clinical control of chronic fatigue syndrome  
5 (CFS). II. Characterization of CFS patients with special reference to their response to a new  
6 vitamin C infusion treatment. *In Vivo* 1996; 10:585-596.  
7

8 (23) Langsjoen PH, Folkers K. Isolated diastolic dysfunction of the myocardium and its  
9 response to CoQ10 treatment. *The Clinical Investigator* 1993; 71:S140-144.  
10

11 (24) Cox IM, Campbell MJ, Dowson D. Red blood cell magnesium and chronic fatigue  
12 syndrome. *Lancet* 1991; 337:757-760.  
13

14 (25) Bentler SE, Hartz AJ, Kuhn EM. Prospective Observational Study of Treatments for  
15 Unexplained Chronic Fatigue. *Journal of Clinical Psychiatry* 2005; 66(5):May-632.  
16

17 (26) Martin RWY, Ogston SA, Evans JR. Effects of Vitamin and Mineral Supplementation  
18 on Symptoms Associated with Chronic Fatigue Syndrome with Coxsackie B Antibodies.  
19 *Journal of Nutritional & Environmental Medicine* 2008; 4:11-23.  
20

21 (27) Wiebe E. N of 1 trails. Managing patients with chronic fatigue syndrome: two case  
22 reports. *Canadian Family Physician* 1996; 42:2214-2217.  
23

24 (28) Brouwers FM, Van Der Werf S, Bleijenberg G, et al. The effect of a polynutrient  
25 supplement on fatigue and physical activity of patients with chronic fatigue syndrome: A  
26 double-blind randomized controlled trial. *QJM: Monthly Journal of the Association of*  
27 *Physicians* 2002; 95(10):677-683.  
28

29 (29) Afari N, Eisenberg DM, Herrell R, et al. Use of alternative treatments by chronic  
30 fatigue syndrome discordant twins. *Integrative Medicine* 2000; 2:97-103.  
31

32 (30) Buchwald D, Garrity D. Comparison of patients with chronic fatigue syndrome,  
33 fibromyalgia, and multiple chemical sensitivities. *Archives of Internal Medicine* 1994;  
34 154(18):2049-2053.  
35

36 (31) Porter NA, Jason LA, Boulton A, et al. Alternative medical interventions used in the  
37 treatment and management of myalgic encephalomyelitis/chronic fatigue syndrome and  
38 fibromyalgia. *Journal of Alternative and Complementary Medicine* 2010; 16(3):235-249.  
39

40 (32) Alraek T, Lee MS, Choi TY, et al. Complementary and alternative medicine for  
41 patients with chronic fatigue syndrome: A systematic review. *BMC Complementary and*  
42 *Alternative Medicine* 2010; 11(87):<http://www.biomedcentral.com/1472-6882/11/87>.  
43

44 (33) Howard A, Arroll M. The application of integral medicine in the treatment of myalgic  
45 encephalomyelitis/ Chronic Fatigue Syndrome. *Journal of Integral Theory and Practice*  
46 2011; 6(4):25-40.  
47

48 (34) Ware JE, Sherbourne CD. The MOS 36-Item Short-Form Health Survey (SF-36).  
49 *Medical Care* 1992; 30:473-481.  
50

51 (35) Tsai C, Bayliss MS, Ware JE. Health Survey Annotated Bibliography: Second Edition  
52 (1988-1996). Boston, MA: Health Assessment Lab, New England Medical Center; 1997.  
53  
54  
55  
56  
57  
58  
59  
60

- 1  
2  
3 (36) Ware JE, Kosinski M, Keller SK. SF-36® Physical and Mental Health Summary  
4 Scales: A User's Manual. Boston, MA: New England Medical Center, The Health Institute;  
5 1994.  
6
- 7 (37) Ware JE, Snow KK, Kosinski M, et al. SF-36® Health Survey Manual and  
8 Interpretation Guide. Boston, MA: New England Medical Center, The Health Institute; 1993.  
9
- 10 (38) Smets E-MA, Garssen B, Bonke B, et al. The Multidimensional Fatigue Inventory  
11 (MFI) psychometric qualities of an instrument to assess fatigue. *Journal of Psychosomatic*  
12 *Research* 1995; 39(3):315-325.  
13
- 14 (39) Wagner D, Nisenbaum R, Heim C, Jet al. Psychometric properties of the CDC  
15 Symptom Inventory for assessment of Chronic Fatigue Syndrome. *Population Health Metrics*  
16 2005; 3(8).  
17
- 18 (40) Chalder T, Berelowitz G, Pawlikowska T, et al. Development of a fatigue scale. *Journal*  
19 *of Psychosomatic Research* 1993; 37:147-153.  
20
- 21 (41) Wallston KA, Wallston BS, DeVellis R. Development of the Multidimensional Health  
22 Locus of Control (MHLC) Scales. *Health Education Monograph* 1978; 6(2):160-170.  
23
- 24 (42) Wallston KA, Stein MJ, Smith CA. Form C of the MHLC Scales: A condition-  
25 specific measure of locus of control. *Journal of Personality Assessment* 1994; 63:534-553.  
26
- 27 (43) Wallston KA, Wallston BS. Health locus of control scales. In: Lefcourt H, editor.  
28 Advances and innovations in locus of control research. New York: Academic Press; 1980.  
29
- 30 (44) Levenson H. Multidimensional locus of control in psychiatric patients. *Journal of*  
31 *Consulting and Clinical Psychology* 1973; 41(3):397-404.  
32  
33  
34  
35  
36  
37  
38  
39  
40  
41  
42  
43  
44  
45  
46  
47  
48  
49  
50  
51  
52  
53  
54  
55  
56  
57  
58  
59  
60

1  
2  
3  
4  
5  
6  
7  
8  
9  
10  
11  
12  
13  
14  
15  
16  
17  
18  
19  
20  
21  
22  
23  
24  
25  
26  
27  
28  
29  
30  
31  
32  
33  
34  
35  
36  
37  
38  
39  
40  
41  
42  
43  
44  
45  
46  
47  
48  
49

**Table 1. Demographics for gender, age and illness duration across the three treatment groups**

|                  |            | Mean                    | SD     | 95% CI for Mean |        | Test statistic    | p-value |
|------------------|------------|-------------------------|--------|-----------------|--------|-------------------|---------|
|                  |            |                         |        | Lower           | Upper  |                   |         |
| Gender           | Psychology | 9 (21.4%) <sup>d</sup>  |        |                 |        | .179 <sup>c</sup> | .915    |
|                  | Nutrition  | 8 (18.2%) <sup>d</sup>  |        |                 |        |                   |         |
|                  | Combined   | 11 (21.2%) <sup>d</sup> |        |                 |        |                   |         |
|                  | Total      | 28 (20.3%) <sup>d</sup> |        |                 |        |                   |         |
| Age              | Psychology | 42.881                  | 13.986 | 38.523          | 47.239 | .000 <sup>a</sup> | 1.000   |
|                  | Nutrition  | 42.864                  | 12.504 | 39.062          | 46.665 |                   |         |
|                  | Combined   | 42.843                  | 11.125 | 39.714          | 45.972 |                   |         |
|                  | Total      | 42.861                  | 12.406 | 40.765          | 44.957 |                   |         |
| Illness duration | Psychology | 8.874                   | 8.252  | 6.302           | 11.445 | .252 <sup>a</sup> | .778    |
|                  | Nutrition  | 10.023                  | 7.375  | 7.781           | 12.265 |                   |         |
|                  | Combined   | 9.625                   | 7.291  | 7.595           | 11.655 |                   |         |
|                  | Total      | 9.523                   | 7.580  | 8.247           | 10.800 |                   |         |

Table 2. Comparisons across time within the primary outcome measures within the overall sample

|                                  | <i>N</i> | Baseline    |        |        | 3-month follow-up |        |        | Comparisons |                 |
|----------------------------------|----------|-------------|--------|--------|-------------------|--------|--------|-------------|-----------------|
|                                  |          | Percentiles |        |        | Percentiles       |        |        | z-statistic | <i>p</i> -value |
|                                  |          | Lower       | Mdn    | Upper  | Lower             | Mdn    | Upper  |             |                 |
| SF-36 Physical Functioning       | 72       | 18.075      | 41.644 | 66.667 | 25.694            | 47.222 | 77.583 | -3.120      | .002**          |
| SF-36 Role limitations physical  | 71       | 0           | 0      | 0      | 0                 | 25     | 50     | -4.321      | .001***         |
| SF-36 Bodily pain                | 72       | 32.5        | 56.25  | 79.375 | 32.500            | 67.500 | 90     | -2.240      | .025*           |
| SF-36 Social functioning         | 72       | 12.5        | 25     | 50     | 12.500            | 50     | 75     | -4.504      | .001***         |
| SF-36 General mental health      | 72       | 53          | 60     | 75     | 57                | 68     | 80     | -2.665      | .008**          |
| SF-36 Role limitations emotional | 72       | 0           | 33.317 | 100    | 41.667            | 66.670 | 100    | -3.159      | .002**          |
| SF-36 Vitality Energy or Fatigue | 72       | 10          | 15     | 35     | 11.250            | 30     | 45     | -4.205      | .001***         |
| SF-36 General health perceptions | 72       | 20          | 30     | 40     | 25                | 40     | 50     | -3.996      | .001***         |
| MFI General Fatigue              | 72       | 15          | 18     | 19     | 12                | 16     | 19     | -3.692      | .001***         |
| MFI Physical Fatigue             | 72       | 15          | 18     | 20     | 12                | 16     | 19     | -4.591      | .001***         |
| MFI Reduced Activity             | 72       | 11          | 15     | 18     | 9                 | 14     | 17     | -2.421      | .015*           |
| MFI Reduced Motivation           | 72       | 8           | 10     | 13.750 | 7                 | 9      | 12     | -2.986      | .003**          |
| MFI Mental Fatigue               | 72       | 11          | 14     | 18     | 8.250             | 12.500 | 15     | -3.661      | .001***         |



Table 3. Comparisons across time within the secondary outcome measures within the overall sample

|                                    | <i>N</i> | Baseline    |     |       | 3-month follow-up |     |        | Comparisons         |                 |
|------------------------------------|----------|-------------|-----|-------|-------------------|-----|--------|---------------------|-----------------|
|                                    |          | Percentiles |     |       | Percentiles       |     |        | <i>z</i> -statistic | <i>p</i> -value |
|                                    |          | Lower       | Mdn | Upper | Lower             | Mdn | Upper  |                     |                 |
| CDC CFS Sore throat                | 70       | 0           | 1.5 | 4     | 0                 | 1   | 2      | -2.257              | .024*           |
| CDC CFS Swollen lymph nodes/glands | 71       | 0           | 2   | 6     | 0                 | 1   | 4      | -1.567              | .115            |
| CDC CFS Diarrhea                   | 72       | 0           | 1   | 4     | 0                 | 0   | 2      | -2.481              | .013*           |
| CDC CFS Fatigue after exertion     | 72       | 9           | 15  | 20    | 6.500             | 12  | 16     | -3.574              | .001***         |
| CDC CFS Muscle aches/pains         | 72       | 4           | 9   | 12    | 1.250             | 6   | 12     | -3.995              | .001***         |
| CDC CFS Pain in joints             | 70       | 0           | 4   | 9     | 0                 | 1   | 6      | -2.908              | .004**          |
| CDC CFS Fever                      | 70       | 0           | 0   | 1     | 0                 | 0   | 0      | -1.667              | .095            |
| CDC CFS Chills                     | 72       | 0           | 2   | 6     | 0                 | 0   | 2.113  | -4.206              | .001***         |
| CDC CFS Unrefreshing sleep         | 72       | 6           | 12  | 16    | 4                 | 6   | 16     | -2.295              | .022*           |
| CDC CFS Sleeping problems          | 72       | 2           | 8   | 12    | 2                 | 4   | 12     | -1.983              | .047*           |
| CDC CFS Headaches                  | 71       | 1           | 6   | 9     | 1                 | 6   | 11.250 | -2.850              | .004**          |

|                                  |    |        |       |        |       |       |        |        |         |
|----------------------------------|----|--------|-------|--------|-------|-------|--------|--------|---------|
| CDC CFS Memory Problems          | 72 | 2      | 6     | 12     | 1     | 6     | 11.250 | -2.053 | .040*   |
| CDC CFS Difficulty Concentrating | 72 | 2.500  | 8.500 | 12     | 1     | 6     | 12     | -3.440 | .001*** |
| CDC CFS Nausea                   | 71 | 0      | 1     | 4      | 0     | 2     | 6      | -0.898 | .369    |
| CDC CFS Abdominal Pain           | 71 | 0      | 2     | 6      | 0     | 2     | 6      | -1.932 | .053    |
| CDC CFS Sinus nasal symptoms     | 71 | 1      | 4     | 6      | 0     | 1     | 6      | -2.862 | .004**  |
| CDC CFS Shortness of breath      | 69 | 0      | 2     | 4      | 0     | 1     | 4      | -2.402 | .016*   |
| CDC CFS Sensitivity to light     | 71 | 0      | 2     | 6      | 0     | 1     | 4      | -2.388 | .017*   |
| CDC CFS Depression               | 72 | 0      | 2     | 6      | 0     | 1     | 4      | -2.297 | .022*   |
| MHLCS Internal                   | 72 | 0.528  | 0.681 | 0.799  | 0.611 | 0.722 | 0.889  | -2.962 | .003**  |
| MHLCS Chance                     | 72 | 0.222  | 0.344 | 0.417  | 0.201 | 0.320 | 0.444  | -1.552 | .121    |
| MHLCS Powerful Others            | 72 | 0.333  | 0.389 | 0.500  | 0.306 | 0.361 | 0.500  | -1.601 | .109    |
| MHLCS Doctors                    | 72 | 0.0833 | 0.139 | 0.222  | 0.083 | 0.111 | 0.194  | -2.381 | .017*   |
| MHLCS Other People               | 72 | 0.194  | 0.250 | 0.3056 | 0.174 | 0.250 | 0.278  | -1.186 | .236    |

1  
2  
3  
4  
5  
6  
7  
8  
9  
10  
11  
12  
13  
14  
15  
16  
17  
18  
19  
20  
21  
22  
23  
24  
25  
26  
27  
28  
29  
30  
31  
32  
33  
34  
35  
36  
37  
38  
39  
40  
41  
42  
43  
44  
45  
46  
47  
48  
49

Table 4. Comparisons across time within the primary outcome measures within the psychology group

|                                  | N  | Baseline    |        |        | 3-month follow-up |        |        | Comparisons |         |
|----------------------------------|----|-------------|--------|--------|-------------------|--------|--------|-------------|---------|
|                                  |    | Percentiles |        |        | Percentiles       |        |        | z-statistic | p-value |
|                                  |    | Lower       | Mdn    | Upper  | Lower             | Mdn    | Upper  |             |         |
| SF-36 Physical Functioning       | 14 | 25.008      | 44.444 | 58.367 | 27.083            | 69.450 | 84.700 | -2.707      | .007**  |
| SF-36 Role limitations physical  | 14 | 0           | 0      | 25     | 0                 | 50     | 81.250 | -2.379      | .017*   |
| SF-36 Bodily pain                | 14 | 39.375      | 57.500 | 80.625 | 32.500            | 72.500 | 90     | -1.195      | .232    |
| SF-36 Social functioning         | 14 | 25          | 37.500 | 50     | 34.375            | 56.250 | 90.625 | -2.689      | .007**  |
| SF-36 General mental health      | 14 | 47          | 62     | 80     | 67                | 76     | 88     | -2.497      | .013*   |
| SF-36 Role limitations emotional | 14 | 24.974      | 100    | 100    | 58.336            | 100    | 100    | -.842       | .400    |
| SF-36 Vitality Energy or Fatigue | 14 | 10          | 20     | 40     | 28.750            | 45     | 52.500 | -3.066      | .002**  |
| SF-36 General health perceptions | 14 | 23.750      | 30     | 41.250 | 31.250            | 40     | 63.750 | -2.561      | .010*   |
| MFI General Fatigue              | 14 | 14          | 16.500 | 18.500 | 9.750             | 13.500 | 18.500 | -2.657      | .008**  |
| MFI Physical Fatigue             | 14 | 13.750      | 16     | 19.250 | 8.750             | 13     | 16.750 | -2.810      | .005**  |
| MFI Reduced Activity             | 14 | 9.750       | 12.500 | 18.250 | 7                 | 9      | 14.500 | -2.142      | .032*   |

|                        |    |        |        |        |       |       |       |        |       |
|------------------------|----|--------|--------|--------|-------|-------|-------|--------|-------|
| MFI Reduced Motivation | 14 | 5.750  | 8      | 11.750 | 4.750 | 5.500 | 8.250 | -2.131 | .033* |
| MFI Mental Fatigue     | 14 | 11.750 | 15.500 | 18     | 6.500 | 9.500 | 15    | -2.950 | .003* |

**Table 5. Comparisons across time within the secondary outcome measures within the psychology group**

|                                    | <i>N</i> | Baseline    |     |       | 3-month follow-up |       |       | Comparisons |                 |
|------------------------------------|----------|-------------|-----|-------|-------------------|-------|-------|-------------|-----------------|
|                                    |          | Percentiles |     |       | Percentiles       |       |       | z-statistic | <i>p</i> -value |
|                                    |          | Lower       | Mdn | Upper | Lower             | Mdn   | Upper |             |                 |
| CDC CFS Sore throat                | 14       | 0           | 2   | 6     | 0                 | 0     | 2.500 | -1.365      | .172            |
| CDC CFS Swollen lymph nodes/glands | 14       | 0           | 0.5 | 2.5   | 0                 | 0     | 4     | -.341       | .733            |
| CDC CFS Diarrhea                   | 14       | 0           | 0   | 2     | 0                 | 0     | 2.500 | -.730       | .465            |
| CDC CFS Fatigue after exertion     | 14       | 9           | 12  | 20    | 7.750             | 9     | 14    | -1.550      | .121            |
| CDC CFS Muscle aches/pains         | 14       | 4           | 9   | 15.25 | 1.750             | 9     | 14    | -2.145      | .032*           |
| CDC CFS Pain in joints             | 14       | 0           | 2.5 | 9     | 0                 | 0.500 | 4.500 | -1.778      | .075            |
| CDC CFS Fever                      | 14       | 0           | 0   | 1.5   | 0                 | 0     | 0.500 | -.135       | .892            |
| CDC CFS Chills                     | 14       | 0           | 1   | 6.75  | 0                 | 0     | 4.500 | -1.970      | .049*           |
| CDC CFS Unrefreshing sleep         | 14       | 9           | 12  | 15.25 | 5.500             | 9     | 16    | -.802       | .422            |

1  
2  
3  
4  
5  
6  
7  
8  
9  
10  
11  
12  
13  
14  
15  
16  
17  
18  
19  
20  
21  
22  
23  
24  
25  
26  
27  
28  
29  
30  
31  
32  
33  
34  
35  
36  
37  
38  
39  
40  
41  
42  
43  
44  
45  
46  
47  
48  
49

|                                  |    |       |       |       |       |       |       |        |        |
|----------------------------------|----|-------|-------|-------|-------|-------|-------|--------|--------|
| CDC CFS Sleeping problems        | 14 | 2.75  | 7     | 12    | 1     | 3     | 9.750 | -1.738 | .082   |
| CDC CFS Headaches                | 14 | 1     | 2.5   | 6     | 0.750 | 1     | 6.750 | -1.200 | .230   |
| CDC CFS Memory Problems          | 14 | 1     | 6     | 9     | 0.750 | 1     | 6.750 | -1.965 | .049*  |
| CDC CFS Difficulty Concentrating | 14 | 3.5   | 9     | 17    | 1     | 5     | 6.750 | -2.809 | .005** |
| CDC CFS Nausea                   | 14 | 0     | 0     | 4.25  | 0     | 1     | 4.500 | -.213  | .832   |
| CDC CFS Abdominal Pain           | 14 | 0     | 2     | 5.25  | 0     | 0     | 6     | -.343  | .732   |
| CDC CFS Sinus nasal symptoms     | 14 | 1     | 3.5   | 4.5   | 0     | 1.500 | 4.500 | -.724  | .469   |
| CDC CFS Shortness of breath      | 14 | 0     | 1.5   | 4.5   | 0     | 0.500 | 2.50  | -1.556 | .120   |
| CDC CFS Sensitivity to light     | 14 | 0     | 1     | 4.5   | 0     | 0     | 1.250 | -1.973 | .049*  |
| CDC CFS Depression               | 14 | 0     | 1.5   | 6     | 0     | 0     | 2     | -1.614 | .106   |
| MHLCS Internal                   | 14 | 0.556 | 0.653 | 0.840 | 0.611 | 0.872 | 0.923 | -2.983 | .003** |
| MHLCS Chance                     | 14 | 0.326 | 0.417 | 0.535 | 0.167 | 0.361 | 0.451 | -2.594 | .009** |
| MHLCS Powerful Others            | 14 | 0.319 | 0.375 | 0.451 | 0.299 | 0.356 | 0.431 | .000   | 1.000  |
| MHLCS Doctors                    | 14 | 0.083 | 0.125 | 0.194 | 0.083 | 0.083 | 0.174 | -1.122 | .262   |
| MHLCS Other People               | 14 | 0.194 | 0.236 | 0.285 | 0.194 | 0.222 | 0.257 | -.118  | .906   |

Table 6. Comparisons across time within the primary outcome measures within the nutrition group

|                                  | <i>N</i> | Baseline    |        |        | 3-month follow-up |        |        | Comparisons |                 |
|----------------------------------|----------|-------------|--------|--------|-------------------|--------|--------|-------------|-----------------|
|                                  |          | Percentiles |        |        | Percentiles       |        |        | z-statistic | <i>p</i> -value |
|                                  |          | Lower       | Mdn    | Upper  | Lower             | Mdn    | Upper  |             |                 |
| SF-36 Physical Functioning       | 27       | 16.7        | 44.444 | 77.778 | 16.700            | 38.889 | 77.778 | -1.136      | .256            |
| SF-36 Role limitations physical  | 26       | 0           | 0      | 0      | 0                 | 25     | 25     | -2.878      | .004**          |
| SF-36 Bodily pain                | 27       | 32.5        | 45     | 67.5   | 35.200            | 67.500 | 90     | -1.800      | .072            |
| SF-36 Social functioning         | 27       | 0           | 25     | 50     | 12.500            | 37.500 | 75     | -2.476      | .013*           |
| SF-36 General mental health      | 27       | 52          | 60     | 72     | 52                | 64     | 80     | -1.696      | .090            |
| SF-36 Role limitations emotional | 27       | 0           | 0      | 100    | 0                 | 66.670 | 100    | -1.788      | .074            |
| SF-36 Vitality Energy or Fatigue | 27       | 5           | 15     | 35     | 15                | 25     | 45     | -2.734      | .006**          |
| SF-36 General health perceptions | 27       | 20          | 25     | 35     | 25                | 35     | 45     | -2.157      | .031*           |
| MFI General Fatigue              | 27       | 15          | 18     | 19     | 12                | 15     | 19     | -2.548      | .011*           |
| MFI Physical Fatigue             | 27       | 14          | 18     | 19     | 11                | 16     | 19     | -2.791      | .005**          |
| MFI Reduced Activity             | 27       | 10          | 14     | 18     | 8                 | 13     | 16     | -2.164      | .030*           |
| MFI Reduced Motivation           | 27       | 8           | 10     | 12     | 6                 | 8      | 12     | -1.985      | .047*           |

1  
2  
3  
4  
5  
6  
7  
8  
9  
10  
11  
12  
13  
14  
15  
16  
17  
18  
19  
20  
21  
22  
23  
24  
25  
26  
27  
28  
29  
30  
31  
32  
33  
34  
35  
36  
37  
38  
39  
40  
41  
42  
43  
44  
45  
46  
47  
48  
49

|                    |    |    |    |    |   |    |    |        |       |
|--------------------|----|----|----|----|---|----|----|--------|-------|
| MFI Mental Fatigue | 27 | 11 | 13 | 16 | 8 | 13 | 15 | -2.082 | .037* |
|--------------------|----|----|----|----|---|----|----|--------|-------|

Table 7. Comparisons across time within the secondary outcome measures within the nutrition group

|                                    | <i>N</i> | Baseline    |       |       | 3-month follow-up |     |       | Comparisons |         |
|------------------------------------|----------|-------------|-------|-------|-------------------|-----|-------|-------------|---------|
|                                    |          | Percentiles |       |       | Percentiles       |     |       | z-statistic | p-value |
|                                    |          | Lower       | Mdn   | Upper | Lower             | Mdn | Upper |             |         |
| CDC CFS Sore throat                | 27       | 8           | 1     | 2     | 0                 | 1   | 2     | -2.211      | .027*   |
| CDC CFS Swollen lymph nodes/glands | 26       | 20          | 0     | 5     | 0                 | 1   | 12    | -2.051      | .040*   |
| CDC CFS Diarrhea                   | 27       | 16          | 0     | 1     | 0                 | 0   | 1     | -1.649      | .099    |
| CDC CFS Fatigue after exertion     | 27       | 25          | 9     | 16    | 4                 | 12  | 20    | -2.209      | .027*   |
| CDC CFS Muscle aches/pains         | 27       | 20          | 4     | 9     | 2                 | 6   | 12    | -2.901      | .004**  |
| CDC CFS Pain in joints             | 26       | 20          | 0.750 | 4     | 0                 | 1   | 6     | -1.827      | .068    |
| CDC CFS Fever                      | 26       | 9           | 0     | 0     | 0                 | 0   | 0     | -1.254      | .210    |
| CDC CFS Chills                     | 27       | 12          | 1     | 3     | 0                 | 0   | 1     | -3.401      | .001*** |
| CDC CFS Unrefreshing sleep         | 27       | 25          | 6     | 12    | 4                 | 6   | 16    | -1.421      | .155    |
| CDC CFS Sleeping problems          | 27       | 25          | 1     | 9     | 2                 | 4   | 16    | -0.190      | .849    |

|                                  |    |       |        |       |       |       |       |        |       |
|----------------------------------|----|-------|--------|-------|-------|-------|-------|--------|-------|
| CDC CFS Headaches                | 26 | 25    | 0.750  | 6     | 1     | 3     | 6     | -1.895 | .058  |
| CDC CFS Memory Problems          | 27 | 25    | 2      | 6     | 2     | 6     | 12    | -0.338 | .735  |
| CDC CFS Difficulty Concentrating | 27 | 25    | 2      | 6     | 4     | 6     | 12    | -1.196 | .232  |
| CDC CFS Nausea                   | 26 | 25    | 0      | 2     | 0     | 1     | 6     | -2.407 | .016* |
| CDC CFS Abdominal Pain           | 26 | 16    | 0.750  | 3     | 0     | 3     | 6     | -2.322 | .020* |
| CDC CFS Sinus nasal symptoms     | 26 | 20    | 1      | 3.500 | 0     | 1     | 9     | -1.244 | .213  |
| CDC CFS Shortness of breath      | 25 | 20    | 0      | 2     | 0     | 1     | 3     | -1.651 | .099  |
| CDC CFS Sensitivity to light     | 26 | 25    | 0      | 4     | 0     | 2     | 6     | -1.890 | .059  |
| CDC CFS Depression               | 27 | 20    | 0      | 4     | 0     | 2     | 4     | -1.584 | .113  |
| MHLCS Internal                   | 27 | 0.944 | 0.528  | 0.667 | 0.528 | 0.639 | 0.778 | -.687  | .492  |
| MHLCS Chance                     | 27 | 0.694 | 0.222  | 0.333 | 0.222 | 0.333 | 0.472 | -.143  | .886  |
| MHLCS Powerful Others            | 27 | 0.694 | 0.333  | 0.389 | 0.278 | 0.361 | 0.528 | -1.843 | .065  |
| MHLCS Doctors                    | 27 | 0.417 | 0.0833 | 0.139 | 0.083 | 0.139 | 0.222 | -1.686 | .092  |
| MHLCS Other People               | 27 | 0.833 | 0.222  | 0.278 | 0.167 | 0.250 | 0.306 | -1.697 | .090  |



1  
2  
3  
4  
5  
6  
7  
8  
9  
10  
11  
12  
13  
14  
15  
16  
17  
18  
19  
20  
21  
22  
23  
24  
25  
26  
27  
28  
29  
30  
31  
32  
33  
34  
35  
36  
37  
38  
39  
40  
41  
42  
43  
44  
45  
46  
47  
48  
49

FOR

**Table 8. Comparisons across time within the primary outcome measures within the combined group**

|                                  | <i>N</i> | Baseline    |        |        | 3-month follow-up |        |        | Comparisons |                 |
|----------------------------------|----------|-------------|--------|--------|-------------------|--------|--------|-------------|-----------------|
|                                  |          | Percentiles |        |        | Percentiles       |        |        | z-statistic | <i>p</i> -value |
|                                  |          | Lower       | Mdn    | Upper  | Lower             | Mdn    | Upper  |             |                 |
| SF-36 Physical Functioning       | 31       | 22.200      | 33.333 | 61.111 | 27.778            | 55.556 | 72.222 | -1.850      | .064            |
| SF-36 Role limitations physical  | 31       | 0           | 0      | 0      | 0                 | 25     | 25     | -2.225      | .026*           |
| SF-36 Bodily pain                | 31       | 32.500      | 45     | 80     | 32.500            | 57.500 | 80     | -1.048      | .294            |
| SF-36 Social functioning         | 31       | 12.500      | 25     | 37.500 | 12.500            | 37.500 | 62.500 | -2.426      | .015*           |
| SF-36 General mental health      | 31       | 56          | 60     | 72     | 56                | 68     | 76     | -0.524      | .600            |
| SF-36 Role limitations emotional | 31       | 0           | 33.333 | 100    | 66.667            | 66.670 | 100    | -2.313      | .021*           |
| SF-36 Vitality Energy or Fatigue | 31       | 10          | 15     | 30     | 10                | 25     | 40     | -1.558      | .119            |
| SF-36 General health perceptions | 31       | 20          | 30     | 40     | 25                | 40     | 55     | -2.423      | .015*           |
| MFI General Fatigue              | 31       | 16          | 18     | 19     | 14                | 17     | 19     | -0.854      | .393            |
| MFI Physical Fatigue             | 31       | 15          | 19     | 20     | 13                | 17     | 20     | -2.364      | .018*           |

|                        |    |    |    |    |    |    |    |        |      |
|------------------------|----|----|----|----|----|----|----|--------|------|
| MFI Reduced Activity   | 31 | 12 | 16 | 18 | 11 | 16 | 18 | -0.070 | .944 |
| MFI Reduced Motivation | 31 | 9  | 11 | 14 | 8  | 10 | 13 | -1.082 | .279 |
| MFI Mental Fatigue     | 31 | 10 | 14 | 18 | 11 | 13 | 16 | -1.586 | .113 |

**Table 9. Comparisons across time within the secondary outcome measures within the combined group**

|                                    | <i>N</i> | Baseline    |       |       | 3-month follow-up |     |       | Comparisons |                 |
|------------------------------------|----------|-------------|-------|-------|-------------------|-----|-------|-------------|-----------------|
|                                    |          | Percentiles |       |       | Percentiles       |     |       | z-statistic | <i>p</i> -value |
|                                    |          | Lower       | Mdn   | Upper | Lower             | Mdn | Upper |             |                 |
| CDC CFS Sore throat                | 29       | 0           | 0     | 3.500 | 0                 | 1   | 2.030 | -0.567      | .571            |
| CDC CFS Swollen lymph nodes/glands | 31       | 0           | 2     | 4     | 0                 | 1   | 3     | -0.725      | .468            |
| CDC CFS Diarrhea                   | 31       | 0           | 2     | 4     | 0                 | 0   | 2     | -1.996      | .046*           |
| CDC CFS Fatigue after exertion     | 31       | 8           | 15    | 20    | 6                 | 12  | 16    | -2.392      | .017*           |
| CDC CFS Muscle aches/pains         | 31       | 2           | 6     | 12    | 1                 | 6   | 9     | -1.908      | .056            |
| CDC CFS Pain in joints             | 30       | 0           | 1.500 | 8     | 0                 | 1   | 4     | -1.680      | .093            |
| CDC CFS Fever                      | 30       | 0           | 0     | 1     | 0                 | 0   | 0.720 | -1.383      | .167            |
| CDC CFS Chills                     | 31       | 0           | 2     | 6     | 0                 | 1   | 2.150 | -2.049      | .040*           |

|                                  |    |       |       |       |       |       |       |        |        |
|----------------------------------|----|-------|-------|-------|-------|-------|-------|--------|--------|
| CDC CFS Unrefreshing sleep       | 31 | 6     | 12    | 16    | 4     | 9     | 16    | -1.513 | .130   |
| CDC CFS Sleeping problems        | 31 | 1     | 6     | 12    | 2     | 4     | 9     | -1.794 | .073   |
| CDC CFS Headaches                | 31 | 2     | 6     | 9     | 1     | 3     | 6     | -2.807 | .005** |
| CDC CFS Memory Problems          | 31 | 2     | 6     | 12    | 1     | 3     | 9     | -1.446 | .148   |
| CDC CFS Difficulty Concentrating | 31 | 2     | 8     | 12    | 1     | 6     | 12    | -1.899 | .058   |
| CDC CFS Nausea                   | 31 | 0     | 1     | 6     | 0     | 2     | 6     | -0.855 | .392   |
| CDC CFS Abdominal Pain           | 31 | 0     | 1     | 6     | 0     | 2     | 4     | -0.598 | .550   |
| CDC CFS Sinus nasal symptoms     | 31 | 0     | 5     | 8     | 0     | 1     | 4     | -2.482 | .013*  |
| CDC CFS Shortness of breath      | 30 | 0     | 2     | 6     | 0     | 1     | 4     | -0.976 | .329   |
| CDC CFS Sensitivity to light     | 31 | 0     | 1     | 6     | 0     | 1     | 4     | -0.787 | .431   |
| CDC CFS Depression               | 31 | 0     | 2     | 6     | 0     | 1     | 6     | -1.304 | .192   |
| MHLCS Internal                   | 31 | 0.556 | 0.694 | 0.861 | 0.639 | 0.750 | 0.889 | -1.755 | .079   |
| MHLCS Chance                     | 31 | 0.222 | 0.333 | 0.361 | 0.167 | 0.306 | 0.417 | -0.672 | .501   |
| MHLCS Powerful Others            | 31 | 0.333 | 0.389 | 0.500 | 0.333 | 0.389 | 0.500 | -0.577 | .564   |
| MHLCS Doctors                    | 31 | 0.111 | 0.167 | 0.222 | 0.083 | 0.139 | 0.500 | -1.384 | .166   |
| MHLCS Other People               | 31 | 0.167 | 0.250 | 0.278 | 0.194 | 0.250 | 0.306 | -0.213 | .831   |

\* significant at .05 level

\*\* significant at .01 level

1  
2  
3  
4  
5  
6  
7  
8  
9  
10  
11  
12  
13  
14  
15  
16  
17  
18  
19  
20  
21  
22  
23  
24  
25  
26  
27  
28  
29  
30  
31  
32  
33  
34  
35  
36  
37  
38  
39  
40  
41  
42  
43  
44  
45  
46  
47  
48  
49

\*\*\* significant at .001 level

For peer review only

## Abstract

Background: Myalgic Encephalomyelitis/Chronic Fatigue Syndrome (ME/CFS) is a condition characterized by severe and persistent fatigue, neurological disturbances, autonomic and endocrine dysfunctions and sleep difficulties that have a pronounced and significant impact on individuals' lives. Current NICE guidelines within the United Kingdom suggest that this condition should be treated with cognitive behavioral therapy and/or graded exercise therapy where appropriate. There is currently a lack of evidence base concerning ~~other, more integrative interventions~~ [alternative techniques](#) that may be beneficial to those with ME/CFS.

Objectives: This study aimed to ~~investigate evaluate~~ whether three ~~patient-centered treatment~~ modalities of psychology, nutrition and combined treatment, influenced symptom report measures in those with ME/CFS over a 3-month time period and whether there were significant differences in these changes between groups.

Design and setting: This is a preliminary prospective study with one follow-up point conducted at a private secondary health care facility in London, UK.

Participants: One-hundred and thirty-eight individuals (110 females, 79.7%; 42 participants in psychology, 44 in nutrition and 52 in combined) participated at baseline and 72 participants completed the battery of measures at follow-up (52.17% response rate; 14, 27, 31 participants in each group, respectively).

Outcome measures: Self-report measures of ME/CFS symptoms, functional ability, multidimensional fatigue, [and](#) perceived control ~~and maladaptive stress~~.

Results: Baseline comparisons showed those in the combined group had higher levels of fatigue. At follow-up, all groups saw improvements in fatigue, functional physical [and](#) symptomatology ~~and maladaptive stress~~; those within the psychology group also experienced a shift in perceived control over time.

1  
2  
3  
4  
5  
6  
7  
8  
9  
10  
11  
12  
13  
14  
15  
16  
17  
18  
19  
20  
21  
22  
23  
24  
25  
26  
27  
28  
29  
30  
31  
32  
33  
34  
35  
36  
37  
38  
39  
40  
41  
42  
43  
44  
45  
46  
47  
48  
49  
50  
51  
52  
53  
54  
55  
56  
57  
58  
59  
60

Conclusions: This study provides early evidence that [psychological, nutritional and combined patient centered](#) techniques for the treatment of ME/CFS may influence symptomatology, fatigue, function, [and](#) perceived control ~~and inappropriate responses to stressors~~. However, these results must be viewed with caution as the allocation to groups was not randomized, there was no control group and the study suffered from high drop-out rates.

### **Summary**

#### **Article focus**

- This preliminary prospective study investigated three (psychological, nutritional and combined) tailored [patient centered](#) interventions for ME/CFS over time.
- Differences between the reported changes over time between groups were also assessed.

#### **Key messages**

- [Psychological, nutritional and combined Patient centered](#) approaches for the management of ME/CFS influence symptomatology over time in some individuals with this disorder.
- Self-reported functional ability (physical and social) are influenced following tailored interventions lasting 3 months.
- This study provides preliminary evidence that tailored psychological, nutritional and combined interventions ~~may be effective treatments for~~ [may influence self-reported symptomatology in](#) some people with ME/CFS; however due to the study's methodological limitations, it is important that ~~these findings is potential treatment effect is are~~ -investigated further in high quality randomized controlled studies.

#### **Strengths and limitations of this study**

- 1  
2  
3  
4  
5  
6  
7 • The findings here are an initial step to fill the gap in the extant literature regarding the  
8 utility of tailored ~~and~~ multidisciplinary ([psychological, nutritional and combined](#)) ~~and~~  
9 ~~patient-centered~~ treatments for ME/CFS.  
10  
11  
12 • There is bias in this study as the participants were self-selected in the sense that they  
13 chose to attend the clinic and which treatment option they preferred (with advice), i.e. the  
14 study was not randomized.  
15  
16  
17 • There were low retention rates in this study which may constitute a bias in that those  
18 who remained in the study may have experienced benefits and those who experienced little or  
19 no benefits may have dropped out.  
20  
21  
22  
23  
24  
25  
26  
27  
28  
29  
30  
31

### **Introduction**

32  
33 Chronic Fatigue Syndrome or myalgic encephalomyelitis (ME/CFS) is a condition  
34 characterized by prolonged and debilitating fatigue, although the exact cause of this disorder  
35 is still under debate. Due to the lack of a definitive biological marker, diagnosis is made on  
36 the basis of the exclusion of other explanatory conditions. The most widely used case  
37 definition by the Centers for Disease Control <sup>1</sup> states that there must be at least six months  
38 severe fatigue of new and definite onset, not the result of ongoing exertion, not alleviated by  
39 rest and resulting in reduced levels of physical activity. The CDC definition also sets out a  
40 series of minor complaints that must accompany the fatigue (cognitive impairment, sore  
41 throat, tender cervical or axillary lymph nodes, muscle pain, multi-joint pain, headaches of a  
42 new type, pattern or severity at onset, unrefreshing sleep and post-exertion malaise), with  
43 individuals needing to have the occurrence of four or more symptoms to be diagnosed with  
44  
45  
46  
47  
48  
49  
50  
51  
52  
53  
54  
55  
56  
57  
58  
59  
60

1  
2  
3  
4  
5  
6  
7 ME/CFS. Estimates of the prevalence of ME/CFS have been made as low as 3 and as high as  
8  
9 2,800 per 100,000 <sup>2</sup>.

10  
11  
12 The most widely researched strategies for alleviating the symptoms of ME/CFS are Cognitive  
13  
14 Behavior Therapy (CBT) and Graded Exercise Therapy (GET). Two reviews of studies on  
15  
16 CBT <sup>3,4</sup> found that it significantly improved physical functioning in adult out-patients as  
17  
18 compared with medical management, counseling, guided support, education and support or  
19  
20 relaxation. Regarding GET, a systematic review illustrated that this form of therapy was  
21  
22 potentially beneficial for people with ME/CFS, especially when combined with a patient  
23  
24 education programme <sup>5</sup>. However, drop-out rates were higher in the GET groups [than control](#)  
25  
26 [groups](#) suggesting that individuals with ME/CFS are averse to this type of therapy. Recently,  
27  
28 a large scale, longitudinal study investigating CBT, GET, Adaptive Pacing Therapy (APT)  
29  
30 and specialist medical care (SMC) [which had very low drop-out rates](#), found that CBT and  
31  
32 GET (when added to SMC) were moderately effective outpatient treatments for this patient  
33  
34 group as opposed to APT or SMC alone <sup>6</sup>.

35  
36  
37 Although CBT and GET studies have shown some promising outcomes, there is no known  
38  
39 cure for ME/CFS. Therefore the National Institute for Health and Clinical Excellence (NICE)  
40  
41 <sup>7</sup> recommends a number of symptom management strategies and interventions aimed at  
42  
43 helping individuals to cope with their condition and reduce physical deconditioning brought  
44  
45 about by the illness. Pharmacological interventions are, at times, suggested for patients with  
46  
47 poor sleep or pain, for instance, low-dose antidepressants, as these have been shown to be  
48  
49 effective <sup>8-14</sup>. However, patient expectations must be realistic as the drugs may help elevate  
50  
51 mood and psychological outlook but not reduce fatigue and other symptomatology associated  
52  
53  
54  
55  
56  
57  
58  
59  
60



1  
2  
3  
4  
5  
6  
7 with ME/CFS<sup>15</sup>. Numerous drugs such as thyroxin, hydrocortisone and antiviral agents are  
8  
9 not advised by NICE due to contradictory findings<sup>16,17</sup>.

10  
11  
12 In terms of function and quality of life management, NICE offers general advice concerning  
13  
14 sleep management, appropriate rest periods, and pacing. Sleep hygiene instruction, together  
15  
16 with pharmacological treatment tailored to the individual patient can be beneficial in  
17  
18 combating fatigue<sup>18</sup>. Dietary management may also reduce symptomatology for those with  
19  
20 concurrent irritable bowel syndrome (IBS). ~~Management approaches recommended for IBS,~~  
21  
22 ~~such as diet restriction, are thus also recommended for those with ME/CFS<sup>19</sup>, although this is~~  
23  
24 ~~not currently recommended by NICE.~~ Dietary supplementation has been investigated in  
25  
26 relation to ME/CFS. Fatty acids<sup>20</sup>, folic acid<sup>21</sup>, vitamin C<sup>22</sup>, co-enzyme Q10<sup>23</sup>, magnesium  
27  
28<sup>24</sup>, multivitamins<sup>25</sup> and minerals<sup>26</sup> have all been shown to reduce symptomatology in  
29  
30 ME/CFS patients. However other studies have shown conflicting findings with regard to  
31  
32 nutritional supplementation, therefore it is perhaps wise to treat with supplements on a case-  
33  
34 by-case basis<sup>27,28</sup>.

35  
36  
37 Due to the lack of clear and definitive treatment strategies, individuals often seek out  
38  
39 Complementary and Alternative Medicines (CAM). Although NICE does not recommend the  
40  
41 use of CAM they do acknowledge that many people with ME/CFS use such therapies and  
42  
43 find them beneficial for symptom management. This view is due to the lack of published  
44  
45 evidence for the effectiveness of these treatments. Examples of CAM treatments used by  
46  
47 individuals with ME/CFS include religious healing, massage therapy, relaxation, meditation,  
48  
49 homeopathy, acupuncture, naturopathy and herbal therapies<sup>29,30</sup>; patient satisfaction with  
50  
51 such approaches as CAM has been high, over 80% in some instances<sup>29</sup>. A recent systematic  
52  
53 review of such interventions identified 70 controlled clinical trials (randomized and non-  
54  
55  
56  
57  
58  
59  
60

1  
2  
3  
4  
5  
6  
7 randomized) and found that 86% of these studies illustrated at least one positive effect, with  
8 74% showing a decrease of illness-related symptomatology <sup>31</sup>. Meditative or mindfulness  
9 approaches warranted further investigation based on these results as did supplement programs  
10 of magnesium, l-carnitine, and S-adenosylmethionine. A subsequent review based solely on  
11 randomized controlled trials (RCTs) of CAM techniques identified 26 such studies and  
12 observed that qigong, massage and tuina (approaches based within Chinese Traditional  
13 Medicine and based upon relaxation and connection with the body) illustrated positive effects  
14 as did supplementation studies utilizing nicotinamide adenine dinucleotide (NADH) and  
15 magnesium <sup>32</sup>. However, within both reviews it was noted that the methodological quality of  
16 reporting was poor and the sample sizes in these studies were small; hence ability to draw  
17 strong conclusions on the efficacy of CAM methods is limited. Porter et al. (2010) <sup>31</sup> did note  
18 that ~~patient centered~~, individualized treatment protocols which include a range of tailored  
19 strategies are a promising area for further investigation for this complex, multi-system illness.  
20  
21  
22  
23  
24  
25  
26  
27  
28  
29  
30  
31  
32  
33  
34  
35  
36

### 37 Objectives

38  
39 There is still much debate and uncertainty regarding ~~alternative interventions the most~~  
40 ~~effective treatment for for those with~~ -ME/CFS. ~~A r~~Recent reviews of CAM techniques <sup>31</sup>  
41 highlight the need for further exploration of ~~patient centered and~~ individually tailored  
42 interventions for the alleviation of the condition's often debilitating and intrusive  
43 symptomatology. This study therefore aims to provide preliminary evidence for the utility of  
44 three types of ~~patient centered~~ approaches (~~psychological, nutritional and combined~~) to the  
45 management of ME/CFS over time (baseline and follow-up) offered at a private health-care  
46 center in the UK.  
47  
48  
49  
50  
51  
52  
53  
54  
55  
56  
57  
58  
59  
60

## **Methods**

### **Study design and setting**

This preliminary prospective study aimed to [investigate whether psychological, nutritional and combined approaches to the ~~explore the effectiveness of three~~ treatment ~~of options offered to individuals with~~ ME/CFS \[influenced symptom report measures over a 3-month time period and whether there were significant differences in these changes between groups.\]\(#\)](#)

The research was conducted at one private secondary health care facility. All potential patients of the clinic are first asked to complete a comprehensive symptom profile and medical history, including questions relating to triggering factors, psychology sub-types and structural/biological sub-types (this is distinct from the research data collected). Subsequent to this, every individual receives a 15-minute screening with one of the practitioners (please note, this was not either of the authors of the current study) who recommends the best course of action for his/her needs; this will be the psychology-related interventions, nutritional advice and support or a combination of the two.

All individuals requesting treatment at the private care setting were offered the opportunity to participate in the study. Those that expressed an interest (N = 145) were emailed a spreadsheet that contained the questionnaires and asked to complete it at their convenience. Informed consent was obtained prior to the completion of the questionnaires and the study was approved by the University of East London Ethics Committee. Participants were told that they could withdraw from the study at any time and that withdrawal would not affect their care at the clinic. Participants were able to ask questions at any point in the study and no deception was used as the participants were informed of the nature of the research program

1  
2  
3  
4  
5  
6  
7 before they agreed to participate. Subsequently, participants were requested to complete the  
8 questionnaire pack on a second occasion, three months from the baseline measures.  
9

### 10 11 12 *Psychology*

13  
14 The clinic offers a 3-month intervention which consists of a combination of Neuro-linguistic  
15 Programming (NLP), Emotional Freedom Technique (EFT), life coaching and  
16 hypnotherapy/self-hypnosis constructed in a manner specific to the needs of those with  
17 ME/CFS. The primary aim of this approach is to reduce the anxiety that is associated with  
18 having a debilitating and unpredictable condition, improve emotional well-being and help  
19 individuals slowly manage and increase their activity within their own limits (i.e. pacing).  
20

21 The program is offered as a series of group sessions and the peer support is seen as an  
22 important component of the intervention, which is solidified via the use of moderated online  
23 support forums, narratives of previous clients' experiences and online materials that can be  
24 accessed as often as necessary. In addition to, or as an alternative to this course, individuals  
25 receive a series of one-to-one sessions and for the most severely affected ME/CFS patients,  
26 telephone sessions are arranged and support materials can be accessed in their own homes.  
27

28 Over the three-month period of this preliminary study, the participants experienced one of  
29 three treatment options. The first option included 13 hours of practitioner contact time in a  
30 mix of group training in person, group telephone conference calls and one-to-one telephone  
31 sessions, the second option was four hours of one-to-one telephone sessions and the final  
32 option was three hours of in person sessions. Participants all had access to various support  
33 materials which included CDs and online resources. The amount of time spent on these was  
34 patient-led, but was in the region of a further six hours. All the practitioners offering this  
35 option are qualified in hypnotherapy, NLP, life coaching and EFT and undergo an intensive  
36 period of training in the clinic's own integrative approach (please see Howard and Arroll <sup>33</sup>  
37  
38  
39  
40  
41  
42  
43  
44  
45  
46  
47  
48  
49  
50  
51  
52  
53  
54  
55  
56  
57  
58  
59  
60

1  
2  
3  
4  
5  
6  
7 for more details of this approach) and ongoing supervision (individual and group supervision  
8 on a biweekly basis) from the department director, who is the only senior practitioner in the  
9 team.  
10  
11

### 12 13 14 *Nutrition*

15  
16 Tailored nutritional therapy is achieved via one-to-one consultations with individuals. To  
17 begin, a very detailed history is taken based upon the information given in the  
18 aforementioned symptom profile. Qualified nutritional therapists (who have been given  
19 specialist training regarding ME/CFS from the clinic) then suggest tests consistent with  
20 symptomatology, for instance the Adrenal Stress Index Test, comprehensive stool  
21 analysis/gastro-intestinal function, vitamin & mineral status, etc. Results from these tests are  
22 then used to compose an evidence-driven diet and supplement program. As most cases of  
23 ME/CFS are complex involving multiple body systems, this process is often iterative and  
24 follow-up consultations are necessary to check progress and make alterations to the protocol.  
25  
26 The nutritional therapy program consists of an initial one-hour evaluation (which includes the  
27 tailored advice) and follow-up approximately every six weeks; therefore, during the course  
28 of the present study, the participants received a minimum of two one-hour sessions with  
29 email support for any queries and detailed nutritional guidance. All the nutritional therapists  
30 are qualified to diploma level and members of (voluntary) regulatory bodies such as the  
31 British Association for Applied Nutrition and Nutritional Therapy (BANT) and the  
32 Complementary and Natural Healthcare Council (CNHC). Similar to the psychology  
33 department, the nutrition department is led by one senior practitioner who supervises the team  
34 with individual and group supervisory arrangements.  
35  
36  
37  
38  
39  
40  
41  
42  
43  
44  
45  
46  
47  
48  
49  
50  
51  
52

### 53 *Combined*

54  
55  
56  
57  
58  
59  
60

1  
2  
3  
4  
5  
6  
7 Within the combined program, a multidisciplinary approach is taken with practitioners  
8 discussing the patients in case meetings to ensure that the psychological and nutritional  
9 aspects complement each other in order to achieve the best outcome. It should be noted that  
10 the interventions in the combined program are phased-in as it was found that asking  
11 individuals to engage in numerous therapeutic activities at the same time resulted in high  
12 drop-out rates.  
13  
14  
15  
16  
17  
18  
19

### 20 **Primary Outcome Measures**

#### 21 *Medical Outcomes Survey Short-Form 36 (SF-36)*

22 This 36-item measure is the short form of the original Medical Outcomes Survey <sup>34</sup> to  
23 measure functional impairment and contains eight sub-sections: 1) physical activity  
24 limitations due to health problems; 2) social activity limitations due to physical or emotional  
25 problems; 3) usual role activity limitations due to physical health problems; 4) bodily pain; 5)  
26 general mental health; 6) role activity limitations due to emotional problems; 7) vitality  
27 (energy and fatigue); and 8) general health perceptions <sup>34</sup>. The items are scored so that higher  
28 scores indicate greater functional ability. In terms of the psychometric properties of this  
29 measure, reliability estimates for all sub-scales are good, exceeding a Cronbach's alpha  
30 coefficient value of 0.70 <sup>35</sup>. In terms of validity, the SF-36 correlates amply,  $r \geq 0.40$ , with the  
31 frequency and severity of numerous symptoms and general health conditions <sup>36,37</sup>.  
32  
33  
34  
35  
36  
37  
38  
39  
40  
41  
42  
43  
44

#### 45 *Multidimensional Fatigue Inventory (MFI)*

46 This 20-item measure contains five fatigue dimensions: general fatigue, physical fatigue,  
47 mental fatigue, reduced motivation and reduced activity <sup>38</sup>. Items such as 'I tire easily' are  
48 rated on a 5-point scale (1 = yes, that is true; 5 = no, that is not true) with lower scores  
49 reflecting higher levels of fatigue. The MFI has good internal consistency with average  
50  
51  
52  
53  
54  
55  
56  
57  
58  
59  
60

1  
2  
3  
4  
5  
6  
7 Cronbach's alpha coefficient equaling 0.84 across the sub-scales. Convergent validity based  
8 on a sample of radiotherapy patients found correlations between the sub-scales and a visual  
9 analog fatigue scale to be 0.77 for general fatigue, 0.70 for physical fatigue, 0.61 for reduced  
10 activity, 0.56 for reduced motivation ( $p < 0.001$ ) to 0.23 for mental fatigue ( $p < 0.01$ )<sup>38</sup>.

### 16 **Secondary Outcome Measures (ME/CFS-specific)**

#### 17 *CDC CFS Symptom Inventory*

18  
19  
20 CDC CFS Symptom Inventory<sup>39</sup> was used to measure specific ME/CFS symptoms and  
21 confirm diagnosis. This instrument is based upon the CDC case definition<sup>1</sup> and includes a  
22 fatigue item and the eight distinct symptoms are also included in the CDC guidelines with an  
23 additional ten associated symptoms. The format of this self-report measure is a six-point scale  
24 of perceived frequency (0 = absent, 5 = all the time) and severity (0 = none, 5 = very severe).  
25  
26 The psychometric properties of this instrument are good: Cronbach's alpha coefficient = 0.88;  
27  $r = .74$  convergent validity with the Chalder Fatigue Scale<sup>40</sup>;  $r = -.68$  and  $-.87$  convergent  
28 validity with the SF-36 'vitality' and 'bodily pain' sub-scales, respectively.  
29  
30  
31  
32  
33  
34  
35  
36

### 37 **Secondary Outcome Measures (psychological)**

#### 38 *Multidimensional Health Locus of Control Scale (MHLCS)*

39  
40  
41 Multidimensional Health Locus of Control<sup>41-43</sup> measures perceived control via three distinct  
42 sub-scales: 'internal', 'chance' and 'powerful others' which has two dimensions, that of  
43 'doctors' and 'other people'. The instrument contains 18 items in total (six items each for the  
44 'internal' and 'chance' scales and three items for both the 'powerful others' scales) and is  
45 scored on a 6-point Likert scale from 'strongly agree' to 'strongly disagree'. Internal  
46 reliability of the instrument is good with Cronbach's alpha coefficients ranging from 0.67 for  
47 'powerful others' to 0.77 for 'internal'. The measure correlates positively and significantly  
48  
49  
50  
51  
52  
53  
54  
55  
56  
57  
58  
59  
60

1  
2  
3  
4  
5  
6  
7 with associated scales from Levenson's<sup>44</sup> locus of control measure from which the MHLOC  
8 was based, which demonstrates good convergent validity<sup>41</sup>.  
9

### 10 11 12 *Maladaptive Stress Index*

13  
14 ~~This 32 item measure contains three sub scales (cognitive/mood, sleep and ME/CFS~~  
15 ~~symptoms) and was designed specifically for this population<sup>45</sup>. Items such as 'I constantly~~  
16 ~~replay or pre-empt situations and conversations' are scored on a 5 point scale where 1 =~~  
17 ~~never true and 5 = always true; higher scores illustrate a greater degree of disturbance.~~  
18  
19  
20  
21

### 22 23 24 **Statistical methods**

25  
26 The data was initially screened for missing data. Four cases contained substantial amounts of  
27 missing data; therefore these were excluded from the analysis (one individual from the  
28 nutrition group and three from the combined group). Subsequent analyses were conducted on  
29 complete data only. Once this was done, all the variables had less than 5% missing data,  
30 hence mean substitution was carried out in line with guidance<sup>46</sup>. The baseline data was  
31 subsequently of the quality for parametric tests, except for the variables CDC CFS swollen  
32 lymph nodes and glands, memory problems, abdominal pain and depression. However, the  
33 follow-up data suffered from high levels of skew and kurtosis which was not substantially  
34 alleviated by data transformation. This violated a key criterion for parametric testing, that of  
35 normality of distribution, so non-parametric tests were selected. In addition, as the sample  
36 sizes in each individual treatment group were small, the more conservative non-parametric  
37 tests were the preferred choice as even though tests such as analysis of variance are generally  
38 robust against non-normality, this does not hold true with small sample sizes. One-way  
39 analysis of variance tests and Kruskal-Wallis tests (the former for those variables that met the  
40 criteria for parametric tests, and the latter that did not) were used to investigate baseline  
41  
42  
43  
44  
45  
46  
47  
48  
49  
50  
51  
52  
53  
54  
55  
56  
57  
58  
59  
60



1  
2  
3  
4  
5  
6  
7 variation and analysis of covariance (ANCOVA) tests were used to account for this variation  
8 and test to for differences between the three groups. Wilcoxon sign-rank tests were  
9 employed to look for differences over time (baseline and 3-month follow-up) and if  
10 differences were significant, percentage change was calculated. Please note, as this is an  
11 exploratory study with only one time-point and no control group, any significant findings do  
12 not infer clinical significance, rather statistical significance, and as such exact p-values are  
13 presented.  
14  
15  
16  
17  
18  
19  
20  
21

## 22 **Results**

### 23 **Participants**

24  
25 Of the 145 individuals who expressed an interest in the study, 142 time-one questionnaires  
26 were returned, equating to a 97.9% response rate at baseline (two participants from the  
27 psychology group and one from the combined group dropped out at this stage). Therefore,  
28 excluding the four cases deleted due to insufficient data, 138 cases were used for baseline  
29 analysis; 42 participants in the psychology group, 44 in the nutrition group and 52 in the  
30 combined group. There was no significant association between gender and group ( $\chi^2 (2) =$   
31  $0.179, p = .915$ ), all groups consisting of approximately one-fifth males (Table 1). There was  
32 not a significant difference in age ( $F(2,135) = 0.001, p = 1.000$ ); in fact group means for age  
33 were near identical at 42.881, 42.864 and 42.843 for psychology, nutrition and combined  
34 groups, respectively. There was also a non-significant result for illness duration ( $F(2, 135) =$   
35  $0.252, p = .778$ ). Therefore, in terms of demographics, the groups were comparable. With  
36 regard to the outcome measures, there were significant differences between the groups in  
37 terms of the MFI sub-scale 'general fatigue' ( $F(2, 135) = 3.219, p = .043$ ), MFI 'physical  
38 fatigue' ( $F(2, 135) = 3.343, p = .038$ ) and the CDC CFS symptom 'swollen lymph nodes and  
39 glands' ( $H(2) = 7.161, p = .028$ ). To investigate the source of these differences, post-hoc tests  
40  
41  
42  
43  
44  
45  
46  
47  
48  
49  
50  
51  
52  
53  
54  
55  
56  
57  
58  
59  
60

1  
2  
3  
4  
5  
6  
7 were conducted (unrelated t-tests for the fatigue variables and Mann-Whitney tests for  
8 swollen lymph glands as the former did not meet criteria for parametric tests, all with  
9 Bonferroni correction for multiple comparisons). A significant difference was observed  
10 between the psychology and combined groups with regards to general fatigue ( $t(92) = -2.449$ ,  
11  $p = .016$ ) and physical fatigue ( $t(92) = -2.658$ ,  $p = .009$ ) and also between the nutrition and  
12 psychology group in terms of the degree of lymph node and gland swelling ( $U = 635.00$ ,  $p =$   
13  $.009$ ). Within the fatigue measures, the combined group reported significantly higher levels  
14 of both general and physical fatigued than the psychology group whereas those undertaking  
15 nutritional support stated a higher occurrence of swollen lymph nodes and glands.  
16  
17  
18  
19  
20  
21  
22  
23

#### 24 25 26 *Retention analysis*

27  
28 Seventy-two of the original 138 participants (14 participants in the psychology group, 27 in  
29 the nutrition group and 31 in the combined group) completed the battery of measures at the 3-  
30 month follow-up, resulting in retention rates of 52.17% in the study overall, 33.33% in the  
31 psychology group, 61.36% in the nutrition group and 59.62% in the combined group. To  
32 investigate whether the individuals who did not complete the time-two measures were  
33 significantly different from those at baseline on demographic and outcome measures, a series  
34 of t-tests and Mann-Whitney tests were performed. Those that dropped out of the research  
35 (although still receiving treatment at the clinic) differed significantly in terms of age ( $t(136) =$   
36  $-2.227$ ,  $p = .028$ ) and illness duration ( $t(136) = -2.549$ ,  $p = .012$ ). Those who remained in the  
37 study were of significantly older age (mean age of those that remained in the study = 45.056,  
38 SD = 11.535; mean age of drop-outs = 40.400, SD = 12.932) and longer illness duration than  
39 those who dropped out (mean age of those that remained in the study = 10.836, SD = 7.383;  
40 mean illness duration of drop-outs = 7.571, SD = 7.472). Individuals who did not remain in  
41  
42  
43  
44  
45  
46  
47  
48  
49  
50  
51  
52  
53  
54  
55  
56  
57  
58  
59  
60

1  
2  
3  
4  
5  
6  
7 the study did not differ significantly in terms of gender ( $\chi^2 (2) = 1.222, p = .269$ ) or any of the  
8  
9 outcome measures.

### 10 11 12 **Comparisons within-groups across time**

#### 13 14 Overall sample

Formatted: Font: Bold, Not Italic

##### 15 16 *Primary outcomes*

17  
18 The following percentage change scores represent statistically significant changes, rather than  
19  
20 clinically significant shifts, as this was an exploratory study. (Please see Table 2 for the exact  
21  
22 ~~p value for each repeated measures comparison.~~ In the sample as a whole, there were  
23  
24 improvements in all areas of the SF-36 (Table 2), with a 5.80% improvement in physical  
25  
26 functioning, a ~~68.9863.32%~~ improvement in role limitations due to physical difficulties, a  
27  
28 5.17% improvement in bodily pain, a 26.17% improvement in social functioning, a 5.77%  
29  
30 improvement in general mental health, a 10.58% improvement in role limitations due to  
31  
32 emotional difficulties, a 22.30% improvement in vitality, energy or fatigue and a 36.49%  
33  
34 improvement in general health perception. When looking at the fatigue sub-scales of the MFI,  
35  
36 all five sub-scales showed significant reductions in fatigue; 8.55% in general fatigue, 10.98%  
37  
38 in physical fatigue, 8.81% in reduced activity, 12.96% in reduced motivation and 12.79% in  
39  
40 mental fatigue.

##### 41 42 43 Secondary outcomes

Formatted: Font: Italic

44  
45 Within the CFS Symptom Inventory (Table 3), there were improvements in occurrence of  
46  
47 sore throats (34.48%), diarrhea (42.47%), fatigue after exertion (16.32%), muscle aches or  
48  
49 muscle pains (21.01%), pain in joints (34.55%) chills (37.00%), unrefreshing sleep (19.55%),  
50  
51 sleeping problems (17.17%), headaches (24.94%), memory problems (17.86%), difficulty  
52  
53 concentrating (26.66%), sinus and nasal symptoms (26.38%), shortness of breath (29.28%),  
54  
55  
56  
57  
58  
59  
60

1  
2  
3  
4  
5  
6  
7 [sensitivity to light \(28.62%\) and depression \(39.55%\). There were no significant differences](#)  
8 [from time-one to time-two in the MHLCS sub-scale of ‘chance’, ‘powerful others’ and ‘other](#)  
9 [people’ \(Table 3\), however the MHLCS did illustrate significant increases in internal locus of](#)  
10 [control \(30.67%\) and that of doctors \(47.49%\).](#)

### 14 **Psychology group**

Formatted: Font: Bold

#### 15 *Primary outcomes*

Formatted: Font: Italic

16  
17  
18  
19  
20 Within the group of individuals who opted for a purely psychological intervention,  
21 improvements were seen in physical functioning (16.75%), role limitations due to physical  
22 problems (84.61%), social functioning (37.81%), general mental health (19.15%), vitality,  
23 energy or fatigue (49.57%) and general health perceptions (19.01%). Also, all the MFI  
24 fatigue scales decreased over a 3-month period, 13.58% in general fatigue, 17.74% in  
25 physical fatigue, 23.20% in reduced activity, 11.42% in reduced motivation and 29.66% in  
26 mental fatigue (Table 4).

#### 27 *Secondary outcomes*

Formatted: Font: Italic

28  
29  
30  
31  
32 [Within those taking part in the psychology intervention, ratings of muscle aches or muscle](#)  
33 [pains \(10.34%\), chills \(23.40%\), memory problems \(44.73%\), difficulty concentrating](#)  
34 [\(39.50%\) and sensitivity to light \(64.58%\) decreased \(Table 5\). A significant increase of](#)  
35 [17.56% was observed in internal locus of control, a decrease of 4.67% in the perception that](#)  
36 [chance played an influential part in the individuals’ lives \(Table 5\).](#)

### 37 **Nutrition group**

Formatted: Font: Bold

#### 38 *Primary outcomes*

Formatted: Font: Italic

39  
40  
41  
42  
43  
44  
45  
46  
47  
48  
49  
50  
51 The nutrition group saw improvements in role limitations due to physical problems  
52 [\(75.2861.05%\)](#), social functioning (24.93%), vitality, energy or fatigue (35.35%), and general  
53  
54  
55  
56  
57  
58  
59  
60

1  
2  
3  
4  
5  
6  
7 health perceptions (29.73%). Once again, all the MFI fatigue scales decreased over a 3-month  
8  
9 period, 13.39% in general fatigue, 15.00% in physical fatigue, 13.28% in reduced activity,  
10  
11 14.64% in reduced motivation and 12.83% in mental fatigue (Table 6).

#### Secondary outcomes

Formatted: Font: Italic

12  
13  
14 In the nutrition group, numerous symptom-related indices also showed improvements (Table  
15  
16 7); sore throat (56.23%), swollen lymph glands (21.21%), fatigue after exertion (13.90%),  
17  
18 muscle aches or muscle pains (20.56%), chills (40.74%), nausea (16.42%) and abdominal  
19  
20 pain (20.16%). No significant differences were found from baseline to follow-up in perceived  
21  
22 control (Table 7).

#### **Combined group**

Formatted: Font: Bold

#### Primary outcomes

Formatted: Font: Italic

23  
24  
25  
26  
27  
28  
29  
30 In terms of general health as ~~evaluated-gauged~~ by the SF-36 measure, the group who received  
31  
32 both psychological and nutritional intervention reported reductions in role limitations due to  
33  
34 physical difficulties (57.02%), social functioning (22.61%), role limitations due to emotional  
35  
36 difficulties (29.47%) and general health perceptions (26.45%). ~~In the combined group, Only~~  
37  
38 one measure of fatigue, that of physical fatigue, saw significant improvements over time  
39  
40 (6.42%) ~~in the combined group~~ (Table 8).

#### Secondary outcomes

Formatted: Font: Italic

41  
42  
43 Those in the combined group saw significant reductions over the 3-month interval in diarrhea  
44  
45 (47.97%), fatigue after exertion (19.20%), chills (40.23%), headaches (36.18%) and sinus and  
46  
47 nasal symptoms (20.56%) (Table 9). No significant differences were found from baseline to  
48  
49 follow-up in perceived control as measured by the MHLCS in the combined treatment group  
50  
51 (Table 9).

1  
2  
3  
4  
5  
6  
7  
8  
9  
10  
11  
12  
13  
14  
15  
16  
17  
18  
19  
20  
21  
22  
23  
24  
25  
26  
27  
28  
29  
30  
31  
32  
33  
34  
35  
36  
37  
38  
39  
40  
41  
42  
43  
44  
45  
46  
47  
48  
49  
50  
51  
52  
53  
54  
55  
56  
57  
58  
59  
60

*Secondary outcomes (ME/CFS specific)*

Within the CFS Symptom Inventory, there were improvements in occurrence of sore throats (46.26%), diarrhea (42.47%), fatigue after exertion (16.32%), muscle aches or muscle pains (21.01%), pain in joints (28.32%), chills (37.00%), unrefreshing sleep (19.55%), sleeping problems (17.17%), headaches (29.47%), memory problems (17.86%), difficulty concentrating (26.66%), sinus and nasal symptoms (14.95%), shortness of breath (29.08%), sensitivity to light (26.26%) and depression (39.55%) in the merged sample. Within those taking part in the psychology intervention, ratings of muscle aches or muscle pains (10.34%), chills (23.40%), memory problems (44.73%), difficulty concentrating (39.50%) and sensitivity to light (64.58%) decreased. In the nutrition group, numerous symptom-related indices also showed improvements; sore throat (56.23%), swollen lymph glands (10.09%), fatigue after exertion (13.90%), muscle aches or muscle pains (20.56%), pain in joints (16.40%), chills (40.74%), headaches (32.19%), abdominal pain (29.05%), and sensitivity to light (18.28%). Those in the combined group saw significant reductions over the 3 month interval in diarrhea (47.97%), fatigue after exertion (19.20%), chills (40.23%), headaches (36.18%) and sinus and nasal symptoms (20.56%). (Please see Table 3 for the descriptive and inferential statistics associated with these findings and the exact p value for each repeated measures comparison.)

*Secondary outcomes (psychological)*

There were no significant differences from time one to time two in the MHLCS sub-scale of 'chance', 'powerful others' and 'other people', however the MHLCS did illustrate significant increases in internal locus of control (30.67%) and that of doctors (47.49%) in the sample as a whole. Reductions were also observed in the Maladaptive Stress Response (11.99%) in the entire group. In the psychology group, a significant increase of 17.56% was observed in

1  
2  
3  
4  
5  
6  
7 internal locus of control, a decrease of 4.67% in the perception that chance played an  
8 influential part in the individuals' lives and a significant reduction in the Maladaptive Stress  
9 Response of 16.75%. No significant differences were found from baseline to follow up in  
10 perceived control in the nutrition group, however the way in which the individuals in this  
11 group responded to stress also decreased, by 11.54%. No significant differences were found  
12 from baseline to follow up in perceived control as measured by the MHLCS in the combined  
13 treatment group although there was a statistically significant difference in the Maladaptive  
14 Stress Response (10.98%). (Please see Table 4 for the descriptive and inferential statistics  
15 associated with these findings and the exact p value for each repeated measures comparison.)  
16  
17  
18  
19  
20  
21  
22  
23  
24  
25

### 26 Comparisons across groups

27 With correction for baseline variation, there were no significant differences between the three  
28 groups in terms of change scores.  
29  
30  
31

## 32 Discussion

### 33 Key results

34  
35  
36  
37 There was statistically significant (rather than known clinically significant) change over time  
38 of numerous measures in all groups investigated. However, this is not to say that these  
39 changes were due to the interventions as the design of this study was exploratory, rather than  
40 experimental (please see below for a further critique of the design). The psychology group  
41 contained the most significant findings, including those concerned with daily functioning,  
42 fatigue, locus of control, ~~and the~~ cognitive CDC CFS specific symptoms ~~and the Maladaptive~~  
43 ~~Stress Response~~. These findings appear consistent with outcomes from other psychological  
44 interventions<sup>3;4;6</sup>. As expected, changes in perceived control were not observed in the  
45 nutrition group as this is not an area that is targeted in this program. However, the more  
46  
47  
48  
49  
50  
51  
52  
53  
54  
55  
56  
57  
58  
59  
60

1  
2  
3  
4  
5  
6  
7 immune-type symptoms such as sore throat ~~and~~, swollen lymph nodes or glands ~~and pain in~~  
8 ~~joints~~ did see significant reductions over time as would be envisaged in treatment protocols  
9 based upon nutritional expertise. The group that exhibited the least significant findings was  
10 the combined group and, as noted below, this may be due to the greater general severity of  
11 symptoms in this group and the need for a more lengthy intervention. Nevertheless,  
12 considering the small sample sizes in the groups at follow-up, these results are very  
13 promising and warrant further attention.  
14  
15  
16  
17  
18  
19

### 20 21 22 **Interpretation**

23  
24 As noted previously <sup>31</sup> ~~patient centered~~, individualized treatment protocols which include a  
25 range of tailored strategies is a favorable direction for dealing with a complex and multi-  
26 system disorder such as ME/CFS. The present study has demonstrated that such interventions  
27 may be useful in lowering symptomatology, improving functioning and helping individuals  
28 gain a greater sense of control over their health status.  
29  
30  
31  
32  
33

### 34 35 36 **Limitations and Generalisability**

37 This study was a preliminary study in a naturalistic setting and as such did not have a robust  
38 design. There was not a control group and the participants were not randomly assigned to  
39 groups, therefore the results should be treated with caution. In order to ascertain whether the  
40 changes in symptom and functional reports were due to the interventions, a randomized  
41 control trial should be conducted (RCT). Also, there was a high drop-out rate from time-one  
42 to time-two and this rate differed across groups. The highest drop-out rate was in the  
43 psychology group; whilst we cannot be sure why this occurred, it is postulated that the  
44 retention was poor in the group as the individuals in the psychology program had more  
45 activities to engage in and may have felt overburdened with the research questionnaires in  
46  
47  
48  
49  
50  
51  
52  
53  
54  
55  
56  
57  
58  
59  
60



1  
2  
3  
4  
5  
6  
7 addition to their session and homework (this would not be the case in the combined group as  
8 the therapeutic activities are phased-in as mentioned above).  
9

10  
11  
12 In this study, each individual was guided to appropriate treatment within an initial screening  
13 with clinic staff; therefore the group was dependent on the nature of the individual's  
14 symptoms and their personal choice as the programs on offer were privately funded. Notably,  
15 the groups did differ in general and physical fatigue with participants in the combined groups  
16 reporting greater fatigue than those in the psychology group which suggests that this group's  
17 general symptomatology was more severe. The combined group illustrated less change over  
18 time compared to the psychology and nutrition groups and it is feasible to infer that  
19 individuals with a greater number and degree of complaints are referred to the combined  
20 group within the clinic. Also, those in the combined group will not experience the intensity of  
21 each intervention as this has been demonstrated to result in non-compliance; therefore,  
22 changes in outcome measures in this group may not be noted at an interval of three months.  
23  
24 Further studies underway presently will investigate follow-ups at 6- and 12-months to  
25 identify whether the findings here are maintained over time and also whether those with  
26 greater symptom severity benefit with a longer intervention. The results from this study will  
27 then inform plans for an RCT of the clinic's practices. As the participants were self-selected  
28 onto these programs, the findings lack generalizability; future work should sample from the  
29 overall ME/CFS population and be randomly-assigned to groups in order to make valid  
30 assumptions regarding the illness-group as a whole.  
31  
32  
33  
34  
35  
36  
37  
38  
39  
40  
41  
42  
43  
44  
45  
46  
47

#### 48 49 **Funding**

50  
51 No external funding was obtained for this research; the work was accomplished in-house at  
52 the clinic in question.  
53  
54  
55  
56  
57  
58  
59  
60

### Data Sharing

Dataset available from the corresponding author at drarroll@theoptimumhealthclinic.com.

Consent was not obtained for data sharing but the presented data are anonymised and risk of identification is low.

### Contributorship

Alex Howard made substantial contributions to the conception and design and acquisition of data, whilst Megan Arroll made a substantial contribution to the analysis and interpretation of data. Both authors made a substantial contribution to the drafting of the article and revisions for the critical review of important intellectual content. Final approval of the version to be published was also granted by both authors.

### Acknowledgements

We would like to thank Dr Tomas Ros for preparing the questionnaire spreadsheet, Niki Gratrix for helping in setting-up the study and Dr Andy McLellan and Val Duschinsky for proof-reading and editing.

### Competing Interests

Alex Howard is the founder and CEO of The Optimum Health Clinic and Megan Arroll is the Director of Research at the Optimum Health Clinic, where this study was conducted.

1  
2  
3  
4  
5  
6  
7 List of abbreviations

8 ME: myalgic encephalomyelitis

9  
10 CFS: Chronic Fatigue Syndrome

11  
12 NICE: National Institute for Health and Clinical Excellence

13  
14 CBT: Cognitive Behavioral Therapy

15  
16 GET: Graded Exercise Therapy

17  
18 APT: Adaptive Pacing Therapy

19  
20 SMC: specialist medical care

21  
22 CAM: Complementary and Alternative Medicine

23  
24 NLP: Neuro-linguistic Programming

25  
26 EFT: Emotional Freedom Technique

27  
28 SF-36: Medical Outcomes Survey Short-Form 36

29  
30 MHLCS: Multidimensional Health Locus of Control Scale

31  
32 MFI: Multidimensional Fatigue Inventory

33  
34 RCT: randomized controlled trial

35  
36  
37  
38  
39  
40  
41  
42  
43  
44  
45  
46  
47  
48  
49  
50  
51  
52  
53  
54  
55  
56  
57  
58  
59  
60  
Reference List

(1) Fukuda K, Straus SE, Hickie I, Sharpe MC, Dobbins JG, Komaroff A. The chronic fatigue syndrome: A comprehensive approach to its definition and study. *Annals of Internal Medicine* 1994; 121:953-959.

(2) Jason LAE, Fennell PAE, Taylor RRE. Handbook of chronic fatigue syndrome. 2003.

(3) Price JR, Couper J. Cognitive behaviour therapy for chronic fatigue syndrome in adults. *The Cochrane Database of Systematic Reviews* 1998; 4:1-38.

(4) Price JR, Mitchell E, Tidy E, Hunot V. Cognitive behaviour therapy for chronic fatigue syndrome in adults. *Cochrane Database of Systematic Reviews* 2008;(Issue 3).

(5) Edmonds M, McGuire H, Price J. Exercise therapy for chronic fatigue syndrome. *The Cochrane Database of Systematic Reviews* 2004; 3:1-25.

1  
2  
3  
4  
5  
6  
7 (6) White PD, Goldsmith AL, Johnson AL, Potts L, Walwyn R, DeCesare JC et al.  
8 Comparison of adaptive pacing therapy, cognitive behaviour therapy, graded exercises  
9 therapy, and specialist medical care for chronic fatigue syndrome (PACE): a randomised trial.  
10 *Lancet* 2011; 377(9768):823-836.

11 (7) National Institute for Health and Clinical Excellence. Chronic fatigue  
12 syndrome/myalgic encephalomyelitis (or encephalopathy): Diagnosis and management of  
13 CFS/ME in adults and children. London: NICE; 2007.

14 (8) Wearden AJ, Morriss RK, Mullis R, Strickland PL, Pearson DJ, Appleby L et al.  
15 Randomised, double-blind, placebo-controlled treatment trial of fluoxetine and graded  
16 exercise for chronic fatigue syndrome. *British Journal of Psychiatry* 1998; 172(6):485-490.

17 (9) Vercoulen JH, Swanink CM, Zitman FG, Vreden SG, Hoofs MP, Fennis JF et al.  
18 Randomised, double-blind, placebo-controlled study of fluoxetine in chronic fatigue  
19 syndrome. *Lancet* 1996; 347(9005):858-861.

20 (10) Goodnick PJ, Jorge CM. Treatment of chronic fatigue syndrome with nefazodone.  
21 *American Journal of Psychiatry* 1999; 156(5):797-798.

22 (11) Goodnick PJ. Treatment of chronic fatigue syndrome with venlafaxine. *American*  
23 *Journal of Psychiatry* 1996; 153(2):294.

24 (12) Goodnick PJ, Sandoval R. Psychotropic treatment of chronic fatigue syndrome and  
25 related disorders. *Journal of Clinical Psychiatry* 1993; 54(1):13-20.

26 (13) Goodnick PJ, Sandoval R, Brickman A, Klimas NG. Bupropion treatment of  
27 fluoxetine-resistant chronic fatigue syndrome. *Biological Psychiatry* 1992; 32(9):834-838.

28 (14) Hickie I. Nefazodone for patients with chronic fatigue syndrome. *Australian and New*  
29 *Zealand Journal of Psychiatry* 1999; 33(2):278-280.

30 (15) Levine P, Schwartz S, Furst G. Medical intervention and management. 2003.

31 (16) Afari N, Buchwald D. Chronic fatigue syndrome: A review. *American Journal of*  
32 *Psychiatry* 2003; 160(2):221-236.

33 (17) Reid S, Chalder T, Cleare A, Hotopf M, Wessely S. Extracts from "Clinical  
34 Evidence": Chronic fatigue syndrome. *British Medical Journal* 2000; 320:292-296.

35 (18) Lange G, Cook DB, Natelson BH. Rehabilitation and Treatment of Fatigue. 2005.

36 (19) Jones J, Boorman J, Cann P, Forbes S, Gomborne J, Heaton K et al. British Society of  
37 Gastroenterology guidelines for the management of the irritable bowel syndrome. *Gut* 2000;  
38 47((Suppl II)):ii1-ii19.

39 (20) Warren G, McKendrick M, Peet M. The role of essential fatty acids in chronic fatigue  
40 syndrome: A case-controlled study of red-cell membrane essential fatty acids (EFA) and a  
41 placebo-controlled treatment study with high dose of EFA. *Acta Neurologica Scandinavica*  
42 1999; 99(2):112-116.

1  
2  
3  
4  
5  
6  
7 (21) Kaslow JE, Rucker L, Onishi R. Liver extract-folic acid-cyanocobalamin vs placebo  
8 for chronic fatigue syndrome. *Archives of Internal Medicine* 1989; 149(11):2501-2503.

9  
10 (22) Kodama M, Kodama T, Murakami M. The value of the dehydroepiandrosterone-  
11 annexed vitamin C infusion treatment in the clinical control of chronic fatigue syndrome  
12 (CFS). II. Characterization of CFS patients with special reference to their response to a new  
13 vitamin C infusion treatment. *In Vivo* 1996; 10:585-596.

14 (23) Langsjoen PH, Folkers K. Isolated diastolic dysfunction of the myocardium and its  
15 response to CoQ10 treatment. *The Clinical Investigator* 1993; 71:S140-144.

16  
17 (24) Cox IM, Campbell MJ, Dowson D. Red blood cell magnesium and chronic fatigue  
18 syndrome. *Lancet* 1991; 337:757-760.

19  
20 (25) Bentler SE, Hartz AJ, Kuhn EM. Prospective Observational Study of Treatments for  
21 Unexplained Chronic Fatigue. *Journal of Clinical Psychiatry* 2005; 66(5):May-632.

22  
23 (26) Martin RWY, Ogston SA, Evans JR. Effects of Vitamin and Mineral Supplementation  
24 on Symptoms Associated with Chronic Fatigue Syndrome with Coxsackie B Antibodies.  
25 *Journal of Nutritional & Environmental Medicine* 2008; 4:11-23.

26  
27 (27) Wiebe E. N of 1 trails. Managing patients with chronic fatigue syndrome: two case  
28 reports. *Canadian Family Physician* 1996; 42:2214-2217.

29  
30 (28) Brouwers FM, Van Der Werf S, Bleijenberg G, Van Der Zee L, Van Der Meer J-WM.  
31 The effect of a polynutrient supplement on fatigue and physical activity of patients with  
32 chronic fatigue syndrome: A double-blind randomized controlled trial. *QJM: Monthly  
33 Journal of the Association of Physicians* 2002; 95(10):677-683.

34  
35 (29) Afari N, Eisenberg DM, Herrell R, Goldberg J, Kleyman E, Ashton S et al. Use of  
36 alternative treatments by chronic fatigue syndrome discordant twins. *Integrative Medicine*  
37 2000; 2:97-103.

38  
39 (30) Buchwald D, Garrity D. Comparison of patients with chronic fatigue syndrome,  
40 fibromyalgia, and multiple chemical sensitivities. *Archives of Internal Medicine* 1994;  
41 154(18):2049-2053.

42  
43 (31) Porter NA, Jason LA, Boulton A, Bothne N, Coleman B. Alternative medical  
44 interventions used in the treatment and management of myalgic encephalomyelitis/chronic  
45 fatigue syndrome and fibromyalgia. *Journal of Alternative and Complementary Medicine*  
46 2010; 16(3):235-249.

47  
48 (32) Alraek T, Lee MS, Choi TY, Cao H, Liu J. Complementary and alternative medicine  
49 for patients with chronic fatigue syndrome: A systematic review. *BMC Complementary and  
50 Alternative Medicine* 2010; 11(87):<http://www.biomedcentral.com/1472-6882/11/87>.

51  
52 (33) Howard A, Arroll M. The application of integral medicine in the treatment of myalgic  
53 encephalomyelitis/ Chronic Fatigue Syndrome. *Journal of Integral Theory and Practice*  
54 2011; 6(4):25-40.  
55  
56  
57  
58  
59  
60

1  
2  
3  
4  
5  
6  
7 (34) Ware JE, Sherbourne CD. The MOS 36-Item Short-Form Health Survey (SF-36).  
8 *Medical Care* 1992; 30:473-481.

9  
10 (35) Tsai C, Bayliss MS, Ware JE. Health Survey Annotated Bibliography: Second Edition  
11 (1988-1996). Boston, MA: Health Assessment Lab, New England Medical Center; 1997.

12 (36) Ware JE, Kosinski M, Keller SK. SF-36® Physical and Mental Health Summary  
13 Scales: A User's Manual. Boston, MA: New England Medical Center, The Health Institute;  
14 1994.

15  
16 (37) Ware JE, Snow KK, Kosinski M, Gandek B. SF-36® Health Survey Manual and  
17 Interpretation Guide. Boston, MA: New England Medical Center, The Health Institute; 1993.

18 (38) Smets E-MA, Garssen B, Bonke B, de Haes J-CJM. The Multidimensional Fatigue  
19 Inventory (MFI) psychometric qualities of an instrument to assess fatigue. *Journal of*  
20 *Psychosomatic Research* 1995; 39(3):315-325.

21  
22 (39) Wagner D, Nisenbaum R, Heim C, Jones JF, Unger ER, Reeves WC. Psychometric  
23 properties of the CDC Symptom Inventory for assessment of Chronic Fatigue  
24 Syndrome. *Population Health Metrics* 2005; 3(8).

25  
26 (40) Chalder T, Berelozit G, Pawlikowska T, Watts L, Wessely S, Wright D et al.  
27 Development of a fatigue scale. *Journal of Psychosomatic Research* 1993; 37:147-153.

28 (41) Wallston KA, Wallston BS, DeVellis R. Development of the Multidimensional Health  
29 Locus of Control (MHLC) Scales. *Health Education Monograph* 1978; 6(2):160-170.

30 (42) Wallston KA, Stein MJ, Smith CA. Form C of the MHLC Scales: A condition-  
31 specific measure of locus of control. *Journal of Personality Assessment* 1994; 63:534-553.

32 (43) Wallston KA, Wallston BS. Health locus of control scales. In: Lefcourt H, editor.  
33 Advances and innovations in locus of control research. New York: Academic Press; 1980.

34 (44) Levenson H. Multidimensional locus of control in psychiatric patients. *Journal of*  
35 *Consulting and Clinical Psychology* 1973; 41(3):397-404.

36  
37  
38  
39  
40  
41  
42 ~~(45) Arroll MA, Howard A. The development of the Maladaptive Stress Index. 2012; in~~  
43 ~~prep.~~

44  
45 ~~(46) Tabachnick BG, Fidell LS. Using multivariate statistics. 4th ed. Needham Heights,~~  
46 ~~MA: Allyn & Bacon; 2001.~~  
47  
48  
49  
50  
51  
52  
53  
54  
55  
56  
57  
58  
59  
60

1  
2  
3  
4  
5  
6  
7  
8  
9  
10  
11  
12  
13  
14  
15  
16  
17  
18  
19  
20  
21  
22  
23  
24  
25  
26  
27  
28  
29  
30  
31  
32  
33  
34  
35  
36  
37  
38  
39  
40  
41  
42  
43  
44  
45  
46  
47  
48  
49

For

Table 1. Demographics for gender, age and illness duration across the three treatment groups

|                  |            | Mean                    | SD     | 95% CI for Mean |        | Test statistic    | p-value |
|------------------|------------|-------------------------|--------|-----------------|--------|-------------------|---------|
|                  |            |                         |        | Lower           | Upper  |                   |         |
| Gender           | Psychology | 9 (21.4%) <sup>d</sup>  |        |                 |        | .179 <sup>c</sup> | .915    |
|                  | Nutrition  | 8 (18.2%) <sup>d</sup>  |        |                 |        |                   |         |
|                  | Combined   | 11 (21.2%) <sup>d</sup> |        |                 |        |                   |         |
|                  | Total      | 28 (20.3%) <sup>d</sup> |        |                 |        |                   |         |
| Age              | Psychology | 42.881                  | 13.986 | 38.523          | 47.239 | .000 <sup>a</sup> | 1.000   |
|                  | Nutrition  | 42.864                  | 12.504 | 39.062          | 46.665 |                   |         |
|                  | Combined   | 42.843                  | 11.125 | 39.714          | 45.972 |                   |         |
|                  | Total      | 42.861                  | 12.406 | 40.765          | 44.957 |                   |         |
| Illness duration | Psychology | 8.874                   | 8.252  | 6.302           | 11.445 | .252 <sup>a</sup> | .778    |
|                  | Nutrition  | 10.023                  | 7.375  | 7.781           | 12.265 |                   |         |
|                  | Combined   | 9.625                   | 7.291  | 7.595           | 11.655 |                   |         |
|                  | Total      | 9.523                   | 7.580  | 8.247           | 10.800 |                   |         |

only

Table 2. Comparisons across time within the primary outcome measures within the overall sample

|                                                  | N  | Baseline    |        |        | 3-month follow-up |        |        | Comparisons |         |
|--------------------------------------------------|----|-------------|--------|--------|-------------------|--------|--------|-------------|---------|
|                                                  |    | Percentiles |        |        | Percentiles       |        |        | z-statistic | p-value |
|                                                  |    | Lower       | Mdn    | Upper  | Lower             | Mdn    | Upper  |             |         |
| <a href="#">SF-36 Physical Functioning</a>       | 72 | 18.075      | 41.644 | 66.667 | 25.694            | 47.222 | 77.583 | -3.120      | .002**  |
| <a href="#">SF-36 Role limitations physical</a>  | 71 | 0           | 0      | 0      | 0                 | 25     | 50     | -4.321      | .001*** |
| <a href="#">SF-36 Bodily pain</a>                | 72 | 32.5        | 56.25  | 79.375 | 32.500            | 67.500 | 90     | -2.240      | .025*   |
| <a href="#">SF-36 Social functioning</a>         | 72 | 12.5        | 25     | 50     | 12.500            | 50     | 75     | -4.504      | .001*** |
| <a href="#">SF-36 General mental health</a>      | 72 | 53          | 60     | 75     | 57                | 68     | 80     | -2.665      | .008**  |
| <a href="#">SF-36 Role limitations emotional</a> | 72 | 0           | 33.317 | 100    | 41.667            | 66.670 | 100    | -3.159      | .002**  |
| <a href="#">SF-36 Vitality Energy or Fatigue</a> | 72 | 10          | 15     | 35     | 11.250            | 30     | 45     | -4.205      | .001*** |
| <a href="#">SF-36 General health perceptions</a> | 72 | 20          | 30     | 40     | 25                | 40     | 50     | -3.996      | .001*** |
| <a href="#">MFI General Fatigue</a>              | 72 | 15          | 18     | 19     | 12                | 16     | 19     | -3.692      | .001*** |
| <a href="#">MFI Physical Fatigue</a>             | 72 | 15          | 18     | 20     | 12                | 16     | 19     | -4.591      | .001*** |
| <a href="#">MFI Reduced Activity</a>             | 72 | 11          | 15     | 18     | 9                 | 14     | 17     | -2.421      | .015*   |
| <a href="#">MFI Reduced Motivation</a>           | 72 | 8           | 10     | 13.750 | 7                 | 9      | 12     | -2.986      | .003**  |
| <a href="#">MFI Mental Fatigue</a>               | 72 | 11          | 14     | 18     | 8.250             | 12.500 | 15     | -3.661      | .001*** |



1  
2  
3  
4  
5  
6  
7  
8  
9  
10  
11  
12  
13  
14  
15  
16  
17  
18  
19  
20  
21  
22  
23  
24  
25  
26  
27  
28  
29  
30  
31  
32  
33  
34  
35  
36  
37  
38  
39  
40  
41  
42  
43  
44  
45  
46  
47  
48  
49

Table 3. Comparisons across time within the secondary outcome measures within the overall sample

|                                                    | N  | Baseline    |     |       | 3-month follow-up |     |        | Comparisons |         |
|----------------------------------------------------|----|-------------|-----|-------|-------------------|-----|--------|-------------|---------|
|                                                    |    | Percentiles |     |       | Percentiles       |     |        | z-statistic | p-value |
|                                                    |    | Lower       | Mdn | Upper | Lower             | Mdn | Upper  |             |         |
| <a href="#">CDC CFS Sore throat</a>                | 70 | 0           | 1.5 | 4     | 0                 | 1   | 2      | -2.257      | .024*   |
| <a href="#">CDC CFS Swollen lymph nodes/glands</a> | 71 | 0           | 2   | 6     | 0                 | 1   | 4      | -1.567      | .115    |
| <a href="#">CDC CFS Diarrhea</a>                   | 72 | 0           | 1   | 4     | 0                 | 0   | 2      | -2.481      | .013*   |
| <a href="#">CDC CFS Fatigue after exertion</a>     | 72 | 9           | 15  | 20    | 6.500             | 12  | 16     | -3.574      | .001*** |
| <a href="#">CDC CFS Muscle aches/pains</a>         | 72 | 4           | 9   | 12    | 1.250             | 6   | 12     | -3.995      | .001*** |
| <a href="#">CDC CFS Pain in joints</a>             | 70 | 0           | 4   | 9     | 0                 | 1   | 6      | -2.908      | .004**  |
| <a href="#">CDC CFS Fever</a>                      | 70 | 0           | 0   | 1     | 0                 | 0   | 0      | -1.667      | .095    |
| <a href="#">CDC CFS Chills</a>                     | 72 | 0           | 2   | 6     | 0                 | 0   | 2.113  | -4.206      | .001*** |
| <a href="#">CDC CFS Unrefreshing sleep</a>         | 72 | 6           | 12  | 16    | 4                 | 6   | 16     | -2.295      | .022*   |
| <a href="#">CDC CFS Sleeping problems</a>          | 72 | 2           | 8   | 12    | 2                 | 4   | 12     | -1.983      | .047*   |
| <a href="#">CDC CFS Headaches</a>                  | 71 | 1           | 6   | 9     | 1                 | 6   | 11.250 | -2.850      | .004**  |

1  
2  
3  
4  
5  
6  
7  
8  
9  
10  
11  
12  
13  
14  
15  
16  
17  
18  
19  
20  
21  
22  
23  
24  
25  
26  
27  
28  
29  
30  
31  
32  
33  
34  
35  
36  
37  
38  
39  
40  
41  
42  
43  
44  
45  
46  
47  
48  
49

|                                                  |                    |                        |                       |                        |                       |                       |                        |                        |                         |
|--------------------------------------------------|--------------------|------------------------|-----------------------|------------------------|-----------------------|-----------------------|------------------------|------------------------|-------------------------|
| <a href="#">CDC CFS Memory Problems</a>          | <a href="#">72</a> | <a href="#">2</a>      | <a href="#">6</a>     | <a href="#">12</a>     | <a href="#">1</a>     | <a href="#">6</a>     | <a href="#">11.250</a> | <a href="#">-2.053</a> | <a href="#">.040*</a>   |
| <a href="#">CDC CFS Difficulty Concentrating</a> | <a href="#">72</a> | <a href="#">2.500</a>  | <a href="#">8.500</a> | <a href="#">12</a>     | <a href="#">1</a>     | <a href="#">6</a>     | <a href="#">12</a>     | <a href="#">-3.440</a> | <a href="#">.001***</a> |
| <a href="#">CDC CFS Nausea</a>                   | <a href="#">71</a> | <a href="#">0</a>      | <a href="#">1</a>     | <a href="#">4</a>      | <a href="#">0</a>     | <a href="#">2</a>     | <a href="#">6</a>      | <a href="#">-0.898</a> | <a href="#">.369</a>    |
| <a href="#">CDC CFS Abdominal Pain</a>           | <a href="#">71</a> | <a href="#">0</a>      | <a href="#">2</a>     | <a href="#">6</a>      | <a href="#">0</a>     | <a href="#">2</a>     | <a href="#">6</a>      | <a href="#">-1.932</a> | <a href="#">.053</a>    |
| <a href="#">CDC CFS Sinus nasal symptoms</a>     | <a href="#">71</a> | <a href="#">1</a>      | <a href="#">4</a>     | <a href="#">6</a>      | <a href="#">0</a>     | <a href="#">1</a>     | <a href="#">6</a>      | <a href="#">-2.862</a> | <a href="#">.004**</a>  |
| <a href="#">CDC CFS Shortness of breath</a>      | <a href="#">69</a> | <a href="#">0</a>      | <a href="#">2</a>     | <a href="#">4</a>      | <a href="#">0</a>     | <a href="#">1</a>     | <a href="#">4</a>      | <a href="#">-2.402</a> | <a href="#">.016*</a>   |
| <a href="#">CDC CFS Sensitivity to light</a>     | <a href="#">71</a> | <a href="#">0</a>      | <a href="#">2</a>     | <a href="#">6</a>      | <a href="#">0</a>     | <a href="#">1</a>     | <a href="#">4</a>      | <a href="#">-2.388</a> | <a href="#">.017*</a>   |
| <a href="#">CDC CFS Depression</a>               | <a href="#">72</a> | <a href="#">0</a>      | <a href="#">2</a>     | <a href="#">6</a>      | <a href="#">0</a>     | <a href="#">1</a>     | <a href="#">4</a>      | <a href="#">-2.297</a> | <a href="#">.022*</a>   |
| <a href="#">MHLCS Internal</a>                   | <a href="#">72</a> | <a href="#">0.528</a>  | <a href="#">0.681</a> | <a href="#">0.799</a>  | <a href="#">0.611</a> | <a href="#">0.722</a> | <a href="#">0.889</a>  | <a href="#">-2.962</a> | <a href="#">.003**</a>  |
| <a href="#">MHLCS Chance</a>                     | <a href="#">72</a> | <a href="#">0.222</a>  | <a href="#">0.344</a> | <a href="#">0.417</a>  | <a href="#">0.201</a> | <a href="#">0.320</a> | <a href="#">0.444</a>  | <a href="#">-1.552</a> | <a href="#">.121</a>    |
| <a href="#">MHLCS Powerful Others</a>            | <a href="#">72</a> | <a href="#">0.333</a>  | <a href="#">0.389</a> | <a href="#">0.500</a>  | <a href="#">0.306</a> | <a href="#">0.361</a> | <a href="#">0.500</a>  | <a href="#">-1.601</a> | <a href="#">.109</a>    |
| <a href="#">MHLCS Doctors</a>                    | <a href="#">72</a> | <a href="#">0.0833</a> | <a href="#">0.139</a> | <a href="#">0.222</a>  | <a href="#">0.083</a> | <a href="#">0.111</a> | <a href="#">0.194</a>  | <a href="#">-2.381</a> | <a href="#">.017*</a>   |
| <a href="#">MHLCS Other People</a>               | <a href="#">72</a> | <a href="#">0.194</a>  | <a href="#">0.250</a> | <a href="#">0.3056</a> | <a href="#">0.174</a> | <a href="#">0.250</a> | <a href="#">0.278</a>  | <a href="#">-1.186</a> | <a href="#">.236</a>    |

only

1  
2  
3  
4  
5  
6  
7  
8  
9  
10  
11  
12  
13  
14  
15  
16  
17  
18  
19  
20  
21  
22  
23  
24  
25  
26  
27  
28  
29  
30  
31  
32  
33  
34  
35  
36  
37  
38  
39  
40  
41  
42  
43  
44  
45  
46  
47  
48  
49

Table 4. Comparisons across time within the primary outcome measures within the psychology group

|                                  | N  | Baseline    |        |        | 3-month follow-up |        |        | Comparisons |         |
|----------------------------------|----|-------------|--------|--------|-------------------|--------|--------|-------------|---------|
|                                  |    | Percentiles |        |        | Percentiles       |        |        | z-statistic | p-value |
|                                  |    | Lower       | Mdn    | Upper  | Lower             | Mdn    | Upper  |             |         |
| SF-36 Physical Functioning       | 14 | 25.008      | 44.444 | 58.367 | 27.083            | 69.450 | 84.700 | -2.707      | .007**  |
| SF-36 Role limitations physical  | 14 | 0           | 0      | 25     | 0                 | 50     | 81.250 | -2.379      | .017*   |
| SF-36 Bodily pain                | 14 | 39.375      | 57.500 | 80.625 | 32.500            | 72.500 | 90     | -1.195      | .232    |
| SF-36 Social functioning         | 14 | 25          | 37.500 | 50     | 34.375            | 56.250 | 90.625 | -2.689      | .007**  |
| SF-36 General mental health      | 14 | 47          | 62     | 80     | 67                | 76     | 88     | -2.497      | .013*   |
| SF-36 Role limitations emotional | 14 | 24.974      | 100    | 100    | 58.336            | 100    | 100    | -.842       | .400    |
| SF-36 Vitality Energy or Fatigue | 14 | 10          | 20     | 40     | 28.750            | 45     | 52.500 | -3.066      | .002**  |
| SF-36 General health perceptions | 14 | 23.750      | 30     | 41.250 | 31.250            | 40     | 63.750 | -2.561      | .010*   |
| MFI General Fatigue              | 14 | 14          | 16.500 | 18.500 | 9.750             | 13.500 | 18.500 | -2.657      | .008**  |
| MFI Physical Fatigue             | 14 | 13.750      | 16     | 19.250 | 8.750             | 13     | 16.750 | -2.810      | .005**  |
| MFI Reduced Activity             | 14 | 9.750       | 12.500 | 18.250 | 7                 | 9      | 14.500 | -2.142      | .032*   |

|                                        |    |        |        |        |       |       |       |        |       |
|----------------------------------------|----|--------|--------|--------|-------|-------|-------|--------|-------|
| <a href="#">MFI Reduced Motivation</a> | 14 | 5.750  | 8      | 11.750 | 4.750 | 5.500 | 8.250 | -2.131 | .033* |
| <a href="#">MFI Mental Fatigue</a>     | 14 | 11.750 | 15.500 | 18     | 6.500 | 9.500 | 15    | -2.950 | .003* |

**Table 5. Comparisons across time within the secondary outcome measures within the psychology group**

|                                                    | N  | Baseline    |     |       | 3-month follow-up |       |       | Comparisons |         |
|----------------------------------------------------|----|-------------|-----|-------|-------------------|-------|-------|-------------|---------|
|                                                    |    | Percentiles |     |       | Percentiles       |       |       | z-statistic | p-value |
|                                                    |    | Lower       | Mdn | Upper | Lower             | Mdn   | Upper |             |         |
| <a href="#">CDC CFS Sore throat</a>                | 14 | 0           | 2   | 6     | 0                 | 0     | 2.500 | -1.365      | .172    |
| <a href="#">CDC CFS Swollen lymph nodes/glands</a> | 14 | 0           | 0.5 | 2.5   | 0                 | 0     | 4     | -.341       | .733    |
| <a href="#">CDC CFS Diarrhea</a>                   | 14 | 0           | 0   | 2     | 0                 | 0     | 2.500 | -.730       | .465    |
| <a href="#">CDC CFS Fatigue after exertion</a>     | 14 | 9           | 12  | 20    | 7.750             | 9     | 14    | -1.550      | .121    |
| <a href="#">CDC CFS Muscle aches/pains</a>         | 14 | 4           | 9   | 15.25 | 1.750             | 9     | 14    | -2.145      | .032*   |
| <a href="#">CDC CFS Pain in joints</a>             | 14 | 0           | 2.5 | 9     | 0                 | 0.500 | 4.500 | -1.778      | .075    |
| <a href="#">CDC CFS Fever</a>                      | 14 | 0           | 0   | 1.5   | 0                 | 0     | 0.500 | -.135       | .892    |
| <a href="#">CDC CFS Chills</a>                     | 14 | 0           | 1   | 6.75  | 0                 | 0     | 4.500 | -1.970      | .049*   |
| <a href="#">CDC CFS Unrefreshing sleep</a>         | 14 | 9           | 12  | 15.25 | 5.500             | 9     | 16    | -.802       | .422    |

1  
2  
3  
4  
5  
6  
7  
8  
9  
10  
11  
12  
13  
14  
15  
16  
17  
18  
19  
20  
21  
22  
23  
24  
25  
26  
27  
28  
29  
30  
31  
32  
33  
34  
35  
36  
37  
38  
39  
40  
41  
42  
43  
44  
45  
46  
47  
48  
49



|                                                  |                    |                       |                       |                       |                       |                       |                       |                        |                        |
|--------------------------------------------------|--------------------|-----------------------|-----------------------|-----------------------|-----------------------|-----------------------|-----------------------|------------------------|------------------------|
| <a href="#">CDC CFS Sleeping problems</a>        | <a href="#">14</a> | <a href="#">2.75</a>  | <a href="#">7</a>     | <a href="#">12</a>    | <a href="#">1</a>     | <a href="#">3</a>     | <a href="#">9.750</a> | <a href="#">-1.738</a> | <a href="#">.082</a>   |
| <a href="#">CDC CFS Headaches</a>                | <a href="#">14</a> | <a href="#">1</a>     | <a href="#">2.5</a>   | <a href="#">6</a>     | <a href="#">0.750</a> | <a href="#">1</a>     | <a href="#">6.750</a> | <a href="#">-1.200</a> | <a href="#">.230</a>   |
| <a href="#">CDC CFS Memory Problems</a>          | <a href="#">14</a> | <a href="#">1</a>     | <a href="#">6</a>     | <a href="#">9</a>     | <a href="#">0.750</a> | <a href="#">1</a>     | <a href="#">6.750</a> | <a href="#">-1.965</a> | <a href="#">.049*</a>  |
| <a href="#">CDC CFS Difficulty Concentrating</a> | <a href="#">14</a> | <a href="#">3.5</a>   | <a href="#">9</a>     | <a href="#">17</a>    | <a href="#">1</a>     | <a href="#">5</a>     | <a href="#">6.750</a> | <a href="#">-2.809</a> | <a href="#">.005**</a> |
| <a href="#">CDC CFS Nausea</a>                   | <a href="#">14</a> | <a href="#">0</a>     | <a href="#">0</a>     | <a href="#">4.25</a>  | <a href="#">0</a>     | <a href="#">1</a>     | <a href="#">4.500</a> | <a href="#">-.213</a>  | <a href="#">.832</a>   |
| <a href="#">CDC CFS Abdominal Pain</a>           | <a href="#">14</a> | <a href="#">0</a>     | <a href="#">2</a>     | <a href="#">5.25</a>  | <a href="#">0</a>     | <a href="#">0</a>     | <a href="#">6</a>     | <a href="#">-.343</a>  | <a href="#">.732</a>   |
| <a href="#">CDC CFS Sinus nasal symptoms</a>     | <a href="#">14</a> | <a href="#">1</a>     | <a href="#">3.5</a>   | <a href="#">4.5</a>   | <a href="#">0</a>     | <a href="#">1.500</a> | <a href="#">4.500</a> | <a href="#">-.724</a>  | <a href="#">.469</a>   |
| <a href="#">CDC CFS Shortness of breath</a>      | <a href="#">14</a> | <a href="#">0</a>     | <a href="#">1.5</a>   | <a href="#">4.5</a>   | <a href="#">0</a>     | <a href="#">0.500</a> | <a href="#">2.50</a>  | <a href="#">-1.556</a> | <a href="#">.120</a>   |
| <a href="#">CDC CFS Sensitivity to light</a>     | <a href="#">14</a> | <a href="#">0</a>     | <a href="#">1</a>     | <a href="#">4.5</a>   | <a href="#">0</a>     | <a href="#">0</a>     | <a href="#">1.250</a> | <a href="#">-1.973</a> | <a href="#">.049*</a>  |
| <a href="#">CDC CFS Depression</a>               | <a href="#">14</a> | <a href="#">0</a>     | <a href="#">1.5</a>   | <a href="#">6</a>     | <a href="#">0</a>     | <a href="#">0</a>     | <a href="#">2</a>     | <a href="#">-1.614</a> | <a href="#">.106</a>   |
| <a href="#">MHLCS Internal</a>                   | <a href="#">14</a> | <a href="#">0.556</a> | <a href="#">0.653</a> | <a href="#">0.840</a> | <a href="#">0.611</a> | <a href="#">0.872</a> | <a href="#">0.923</a> | <a href="#">-2.983</a> | <a href="#">.003**</a> |
| <a href="#">MHLCS Chance</a>                     | <a href="#">14</a> | <a href="#">0.326</a> | <a href="#">0.417</a> | <a href="#">0.535</a> | <a href="#">0.167</a> | <a href="#">0.361</a> | <a href="#">0.451</a> | <a href="#">-2.594</a> | <a href="#">.009**</a> |
| <a href="#">MHLCS Powerful Others</a>            | <a href="#">14</a> | <a href="#">0.319</a> | <a href="#">0.375</a> | <a href="#">0.451</a> | <a href="#">0.299</a> | <a href="#">0.356</a> | <a href="#">0.431</a> | <a href="#">.000</a>   | <a href="#">1.000</a>  |
| <a href="#">MHLCS Doctors</a>                    | <a href="#">14</a> | <a href="#">0.083</a> | <a href="#">0.125</a> | <a href="#">0.194</a> | <a href="#">0.083</a> | <a href="#">0.083</a> | <a href="#">0.174</a> | <a href="#">-1.122</a> | <a href="#">.262</a>   |
| <a href="#">MHLCS Other People</a>               | <a href="#">14</a> | <a href="#">0.194</a> | <a href="#">0.236</a> | <a href="#">0.285</a> | <a href="#">0.194</a> | <a href="#">0.222</a> | <a href="#">0.257</a> | <a href="#">-.118</a>  | <a href="#">.906</a>   |

**Table 6. Comparisons across time within the primary outcome measures within the nutrition group**

|                                  | N  | Baseline    |        |        | 3-month follow-up |        |        | Comparisons |         |
|----------------------------------|----|-------------|--------|--------|-------------------|--------|--------|-------------|---------|
|                                  |    | Percentiles |        |        | Percentiles       |        |        | z-statistic | p-value |
|                                  |    | Lower       | Mdn    | Upper  | Lower             | Mdn    | Upper  |             |         |
| SF-36 Physical Functioning       | 27 | 16.7        | 44.444 | 77.778 | 16.700            | 38.889 | 77.778 | -1.136      | .256    |
| SF-36 Role limitations physical  | 26 | 0           | 0      | 0      | 0                 | 25     | 25     | -2.878      | .004**  |
| SF-36 Bodily pain                | 27 | 32.5        | 45     | 67.5   | 35.200            | 67.500 | 90     | -1.800      | .072    |
| SF-36 Social functioning         | 27 | 0           | 25     | 50     | 12.500            | 37.500 | 75     | -2.476      | .013*   |
| SF-36 General mental health      | 27 | 52          | 60     | 72     | 52                | 64     | 80     | -1.696      | .090    |
| SF-36 Role limitations emotional | 27 | 0           | 0      | 100    | 0                 | 66.670 | 100    | -1.788      | .074    |
| SF-36 Vitality Energy or Fatigue | 27 | 5           | 15     | 35     | 15                | 25     | 45     | -2.734      | .006**  |
| SF-36 General health perceptions | 27 | 20          | 25     | 35     | 25                | 35     | 45     | -2.157      | .031*   |
| MFI General Fatigue              | 27 | 15          | 18     | 19     | 12                | 15     | 19     | -2.548      | .011*   |
| MFI Physical Fatigue             | 27 | 14          | 18     | 19     | 11                | 16     | 19     | -2.791      | .005**  |
| MFI Reduced Activity             | 27 | 10          | 14     | 18     | 8                 | 13     | 16     | -2.164      | .030*   |
| MFI Reduced Motivation           | 27 | 8           | 10     | 12     | 6                 | 8      | 12     | -1.985      | .047*   |

|                                    |                    |                    |                    |                    |                   |                    |                    |                        |                       |
|------------------------------------|--------------------|--------------------|--------------------|--------------------|-------------------|--------------------|--------------------|------------------------|-----------------------|
| <a href="#">MFI Mental Fatigue</a> | <a href="#">27</a> | <a href="#">11</a> | <a href="#">13</a> | <a href="#">16</a> | <a href="#">8</a> | <a href="#">13</a> | <a href="#">15</a> | <a href="#">-2.082</a> | <a href="#">.037*</a> |
|------------------------------------|--------------------|--------------------|--------------------|--------------------|-------------------|--------------------|--------------------|------------------------|-----------------------|

**Table 7. Comparisons across time within the secondary outcome measures within the nutrition group**

|                                                    | N                  | Baseline           |                       |                    | 3-month follow-up |                    |                    | Comparisons            |                         |
|----------------------------------------------------|--------------------|--------------------|-----------------------|--------------------|-------------------|--------------------|--------------------|------------------------|-------------------------|
|                                                    |                    | Percentiles        |                       |                    | Percentiles       |                    |                    | z-statistic            | p-value                 |
|                                                    |                    | Lower              | Mdn                   | Upper              | Lower             | Mdn                | Upper              |                        |                         |
| <a href="#">CDC CFS Sore throat</a>                | <a href="#">27</a> | <a href="#">8</a>  | <a href="#">1</a>     | <a href="#">2</a>  | <a href="#">0</a> | <a href="#">1</a>  | <a href="#">2</a>  | <a href="#">-2.211</a> | <a href="#">.027*</a>   |
| <a href="#">CDC CFS Swollen lymph nodes/glands</a> | <a href="#">26</a> | <a href="#">20</a> | <a href="#">0</a>     | <a href="#">5</a>  | <a href="#">0</a> | <a href="#">1</a>  | <a href="#">12</a> | <a href="#">-2.051</a> | <a href="#">.040*</a>   |
| <a href="#">CDC CFS Diarrhea</a>                   | <a href="#">27</a> | <a href="#">16</a> | <a href="#">0</a>     | <a href="#">1</a>  | <a href="#">0</a> | <a href="#">0</a>  | <a href="#">1</a>  | <a href="#">-1.649</a> | <a href="#">.099</a>    |
| <a href="#">CDC CFS Fatigue after exertion</a>     | <a href="#">27</a> | <a href="#">25</a> | <a href="#">9</a>     | <a href="#">16</a> | <a href="#">4</a> | <a href="#">12</a> | <a href="#">20</a> | <a href="#">-2.209</a> | <a href="#">.027*</a>   |
| <a href="#">CDC CFS Muscle aches/pains</a>         | <a href="#">27</a> | <a href="#">20</a> | <a href="#">4</a>     | <a href="#">9</a>  | <a href="#">2</a> | <a href="#">6</a>  | <a href="#">12</a> | <a href="#">-2.901</a> | <a href="#">.004**</a>  |
| <a href="#">CDC CFS Pain in joints</a>             | <a href="#">26</a> | <a href="#">20</a> | <a href="#">0.750</a> | <a href="#">4</a>  | <a href="#">0</a> | <a href="#">1</a>  | <a href="#">6</a>  | <a href="#">-1.827</a> | <a href="#">.068</a>    |
| <a href="#">CDC CFS Fever</a>                      | <a href="#">26</a> | <a href="#">9</a>  | <a href="#">0</a>     | <a href="#">0</a>  | <a href="#">0</a> | <a href="#">0</a>  | <a href="#">0</a>  | <a href="#">-1.254</a> | <a href="#">.210</a>    |
| <a href="#">CDC CFS Chills</a>                     | <a href="#">27</a> | <a href="#">12</a> | <a href="#">1</a>     | <a href="#">3</a>  | <a href="#">0</a> | <a href="#">0</a>  | <a href="#">1</a>  | <a href="#">-3.401</a> | <a href="#">.001***</a> |
| <a href="#">CDC CFS Unrefreshing sleep</a>         | <a href="#">27</a> | <a href="#">25</a> | <a href="#">6</a>     | <a href="#">12</a> | <a href="#">4</a> | <a href="#">6</a>  | <a href="#">16</a> | <a href="#">-1.421</a> | <a href="#">.155</a>    |
| <a href="#">CDC CFS Sleeping problems</a>          | <a href="#">27</a> | <a href="#">25</a> | <a href="#">1</a>     | <a href="#">9</a>  | <a href="#">2</a> | <a href="#">4</a>  | <a href="#">16</a> | <a href="#">-0.190</a> | <a href="#">.849</a>    |

1  
2  
3  
4  
5  
6  
7  
8  
9  
10  
11  
12  
13  
14  
15  
16  
17  
18  
19  
20  
21  
22  
23  
24  
25  
26  
27  
28  
29  
30  
31  
32  
33  
34  
35  
36  
37  
38  
39  
40  
41  
42  
43  
44  
45  
46  
47  
48  
49

|                                                  |                    |                       |                        |                       |                       |                       |                       |                        |                       |
|--------------------------------------------------|--------------------|-----------------------|------------------------|-----------------------|-----------------------|-----------------------|-----------------------|------------------------|-----------------------|
| <a href="#">CDC CFS Headaches</a>                | <a href="#">26</a> | <a href="#">25</a>    | <a href="#">0.750</a>  | <a href="#">6</a>     | <a href="#">1</a>     | <a href="#">3</a>     | <a href="#">6</a>     | <a href="#">-1.895</a> | <a href="#">.058</a>  |
| <a href="#">CDC CFS Memory Problems</a>          | <a href="#">27</a> | <a href="#">25</a>    | <a href="#">2</a>      | <a href="#">6</a>     | <a href="#">2</a>     | <a href="#">6</a>     | <a href="#">12</a>    | <a href="#">-0.338</a> | <a href="#">.735</a>  |
| <a href="#">CDC CFS Difficulty Concentrating</a> | <a href="#">27</a> | <a href="#">25</a>    | <a href="#">2</a>      | <a href="#">6</a>     | <a href="#">4</a>     | <a href="#">6</a>     | <a href="#">12</a>    | <a href="#">-1.196</a> | <a href="#">.232</a>  |
| <a href="#">CDC CFS Nausea</a>                   | <a href="#">26</a> | <a href="#">25</a>    | <a href="#">0</a>      | <a href="#">2</a>     | <a href="#">0</a>     | <a href="#">1</a>     | <a href="#">6</a>     | <a href="#">-2.407</a> | <a href="#">.016*</a> |
| <a href="#">CDC CFS Abdominal Pain</a>           | <a href="#">26</a> | <a href="#">16</a>    | <a href="#">0.750</a>  | <a href="#">3</a>     | <a href="#">0</a>     | <a href="#">3</a>     | <a href="#">6</a>     | <a href="#">-2.322</a> | <a href="#">.020*</a> |
| <a href="#">CDC CFS Sinus nasal symptoms</a>     | <a href="#">26</a> | <a href="#">20</a>    | <a href="#">1</a>      | <a href="#">3.500</a> | <a href="#">0</a>     | <a href="#">1</a>     | <a href="#">9</a>     | <a href="#">-1.244</a> | <a href="#">.213</a>  |
| <a href="#">CDC CFS Shortness of breath</a>      | <a href="#">25</a> | <a href="#">20</a>    | <a href="#">0</a>      | <a href="#">2</a>     | <a href="#">0</a>     | <a href="#">1</a>     | <a href="#">3</a>     | <a href="#">-1.651</a> | <a href="#">.099</a>  |
| <a href="#">CDC CFS Sensitivity to light</a>     | <a href="#">26</a> | <a href="#">25</a>    | <a href="#">0</a>      | <a href="#">4</a>     | <a href="#">0</a>     | <a href="#">2</a>     | <a href="#">6</a>     | <a href="#">-1.890</a> | <a href="#">.059</a>  |
| <a href="#">CDC CFS Depression</a>               | <a href="#">27</a> | <a href="#">20</a>    | <a href="#">0</a>      | <a href="#">4</a>     | <a href="#">0</a>     | <a href="#">2</a>     | <a href="#">4</a>     | <a href="#">-1.584</a> | <a href="#">.113</a>  |
| <a href="#">MHLCS Internal</a>                   | <a href="#">27</a> | <a href="#">0.944</a> | <a href="#">0.528</a>  | <a href="#">0.667</a> | <a href="#">0.528</a> | <a href="#">0.639</a> | <a href="#">0.778</a> | <a href="#">-.687</a>  | <a href="#">.492</a>  |
| <a href="#">MHLCS Chance</a>                     | <a href="#">27</a> | <a href="#">0.694</a> | <a href="#">0.222</a>  | <a href="#">0.333</a> | <a href="#">0.222</a> | <a href="#">0.333</a> | <a href="#">0.472</a> | <a href="#">-.143</a>  | <a href="#">.886</a>  |
| <a href="#">MHLCS Powerful Others</a>            | <a href="#">27</a> | <a href="#">0.694</a> | <a href="#">0.333</a>  | <a href="#">0.389</a> | <a href="#">0.278</a> | <a href="#">0.361</a> | <a href="#">0.528</a> | <a href="#">-1.843</a> | <a href="#">.065</a>  |
| <a href="#">MHLCS Doctors</a>                    | <a href="#">27</a> | <a href="#">0.417</a> | <a href="#">0.0833</a> | <a href="#">0.139</a> | <a href="#">0.083</a> | <a href="#">0.139</a> | <a href="#">0.222</a> | <a href="#">-1.686</a> | <a href="#">.092</a>  |
| <a href="#">MHLCS Other People</a>               | <a href="#">27</a> | <a href="#">0.833</a> | <a href="#">0.222</a>  | <a href="#">0.278</a> | <a href="#">0.167</a> | <a href="#">0.250</a> | <a href="#">0.306</a> | <a href="#">-1.697</a> | <a href="#">.090</a>  |

only



Table 8. Comparisons across time within the primary outcome measures within the combined group

|                                                  | N  | Baseline    |        |        | 3-month follow-up |        |        | Comparisons |         |
|--------------------------------------------------|----|-------------|--------|--------|-------------------|--------|--------|-------------|---------|
|                                                  |    | Percentiles |        |        | Percentiles       |        |        | z-statistic | p-value |
|                                                  |    | Lower       | Mdn    | Upper  | Lower             | Mdn    | Upper  |             |         |
| <a href="#">SF-36 Physical Functioning</a>       | 31 | 22.200      | 33.333 | 61.111 | 27.778            | 55.556 | 72.222 | -1.850      | .064    |
| <a href="#">SF-36 Role limitations physical</a>  | 31 | 0           | 0      | 0      | 0                 | 25     | 25     | -2.225      | .026*   |
| <a href="#">SF-36 Bodily pain</a>                | 31 | 32.500      | 45     | 80     | 32.500            | 57.500 | 80     | -1.048      | .294    |
| <a href="#">SF-36 Social functioning</a>         | 31 | 12.500      | 25     | 37.500 | 12.500            | 37.500 | 62.500 | -2.426      | .015*   |
| <a href="#">SF-36 General mental health</a>      | 31 | 56          | 60     | 72     | 56                | 68     | 76     | -0.524      | .600    |
| <a href="#">SF-36 Role limitations emotional</a> | 31 | 0           | 33.333 | 100    | 66.667            | 66.670 | 100    | -2.313      | .021*   |
| <a href="#">SF-36 Vitality Energy or Fatigue</a> | 31 | 10          | 15     | 30     | 10                | 25     | 40     | -1.558      | .119    |
| <a href="#">SF-36 General health perceptions</a> | 31 | 20          | 30     | 40     | 25                | 40     | 55     | -2.423      | .015*   |
| <a href="#">MFI General Fatigue</a>              | 31 | 16          | 18     | 19     | 14                | 17     | 19     | -0.854      | .393    |
| <a href="#">MFI Physical Fatigue</a>             | 31 | 15          | 19     | 20     | 13                | 17     | 20     | -2.364      | .018*   |

|                                        |                    |                    |                    |                    |                    |                    |                    |                        |                      |
|----------------------------------------|--------------------|--------------------|--------------------|--------------------|--------------------|--------------------|--------------------|------------------------|----------------------|
| <a href="#">MFI Reduced Activity</a>   | <a href="#">31</a> | <a href="#">12</a> | <a href="#">16</a> | <a href="#">18</a> | <a href="#">11</a> | <a href="#">16</a> | <a href="#">18</a> | <a href="#">-0.070</a> | <a href="#">.944</a> |
| <a href="#">MFI Reduced Motivation</a> | <a href="#">31</a> | <a href="#">9</a>  | <a href="#">11</a> | <a href="#">14</a> | <a href="#">8</a>  | <a href="#">10</a> | <a href="#">13</a> | <a href="#">-1.082</a> | <a href="#">.279</a> |
| <a href="#">MFI Mental Fatigue</a>     | <a href="#">31</a> | <a href="#">10</a> | <a href="#">14</a> | <a href="#">18</a> | <a href="#">11</a> | <a href="#">13</a> | <a href="#">16</a> | <a href="#">-1.586</a> | <a href="#">.113</a> |

**Table 9. Comparisons across time within the secondary outcome measures within the combined group**

|                                                    | <i>N</i>           | Baseline          |                       |                       | 3-month follow-up |                    |                       | Comparisons            |                       |
|----------------------------------------------------|--------------------|-------------------|-----------------------|-----------------------|-------------------|--------------------|-----------------------|------------------------|-----------------------|
|                                                    |                    | Percentiles       |                       |                       | Percentiles       |                    |                       | <i>z</i> -statistic    | <i>p</i> -value       |
|                                                    |                    | Lower             | Mdn                   | Upper                 | Lower             | Mdn                | Upper                 |                        |                       |
| <a href="#">CDC CFS Sore throat</a>                | <a href="#">29</a> | <a href="#">0</a> | <a href="#">0</a>     | <a href="#">3.500</a> | <a href="#">0</a> | <a href="#">1</a>  | <a href="#">2.030</a> | <a href="#">-0.567</a> | <a href="#">.571</a>  |
| <a href="#">CDC CFS Swollen lymph nodes/glands</a> | <a href="#">31</a> | <a href="#">0</a> | <a href="#">2</a>     | <a href="#">4</a>     | <a href="#">0</a> | <a href="#">1</a>  | <a href="#">3</a>     | <a href="#">-0.725</a> | <a href="#">.468</a>  |
| <a href="#">CDC CFS Diarrhea</a>                   | <a href="#">31</a> | <a href="#">0</a> | <a href="#">2</a>     | <a href="#">4</a>     | <a href="#">0</a> | <a href="#">0</a>  | <a href="#">2</a>     | <a href="#">-1.996</a> | <a href="#">.046*</a> |
| <a href="#">CDC CFS Fatigue after exertion</a>     | <a href="#">31</a> | <a href="#">8</a> | <a href="#">15</a>    | <a href="#">20</a>    | <a href="#">6</a> | <a href="#">12</a> | <a href="#">16</a>    | <a href="#">-2.392</a> | <a href="#">.017*</a> |
| <a href="#">CDC CFS Muscle aches/pains</a>         | <a href="#">31</a> | <a href="#">2</a> | <a href="#">6</a>     | <a href="#">12</a>    | <a href="#">1</a> | <a href="#">6</a>  | <a href="#">9</a>     | <a href="#">-1.908</a> | <a href="#">.056</a>  |
| <a href="#">CDC CFS Pain in joints</a>             | <a href="#">30</a> | <a href="#">0</a> | <a href="#">1.500</a> | <a href="#">8</a>     | <a href="#">0</a> | <a href="#">1</a>  | <a href="#">4</a>     | <a href="#">-1.680</a> | <a href="#">.093</a>  |
| <a href="#">CDC CFS Fever</a>                      | <a href="#">30</a> | <a href="#">0</a> | <a href="#">0</a>     | <a href="#">1</a>     | <a href="#">0</a> | <a href="#">0</a>  | <a href="#">0.720</a> | <a href="#">-1.383</a> | <a href="#">.167</a>  |
| <a href="#">CDC CFS Chills</a>                     | <a href="#">31</a> | <a href="#">0</a> | <a href="#">2</a>     | <a href="#">6</a>     | <a href="#">0</a> | <a href="#">1</a>  | <a href="#">2.150</a> | <a href="#">-2.049</a> | <a href="#">.040*</a> |

1  
2  
3  
4  
5  
6  
7  
8  
9  
10  
11  
12  
13  
14  
15  
16  
17  
18  
19  
20  
21  
22  
23  
24  
25  
26  
27  
28  
29  
30  
31  
32  
33  
34  
35  
36  
37  
38  
39  
40  
41  
42  
43  
44  
45  
46  
47  
48  
49

|                                                  |                    |                       |                       |                       |                       |                       |                       |                        |                        |
|--------------------------------------------------|--------------------|-----------------------|-----------------------|-----------------------|-----------------------|-----------------------|-----------------------|------------------------|------------------------|
| <a href="#">CDC CFS Unrefreshing sleep</a>       | <a href="#">31</a> | <a href="#">6</a>     | <a href="#">12</a>    | <a href="#">16</a>    | <a href="#">4</a>     | <a href="#">9</a>     | <a href="#">16</a>    | <a href="#">-1.513</a> | <a href="#">.130</a>   |
| <a href="#">CDC CFS Sleeping problems</a>        | <a href="#">31</a> | <a href="#">1</a>     | <a href="#">6</a>     | <a href="#">12</a>    | <a href="#">2</a>     | <a href="#">4</a>     | <a href="#">9</a>     | <a href="#">-1.794</a> | <a href="#">.073</a>   |
| <a href="#">CDC CFS Headaches</a>                | <a href="#">31</a> | <a href="#">2</a>     | <a href="#">6</a>     | <a href="#">9</a>     | <a href="#">1</a>     | <a href="#">3</a>     | <a href="#">6</a>     | <a href="#">-2.807</a> | <a href="#">.005**</a> |
| <a href="#">CDC CFS Memory Problems</a>          | <a href="#">31</a> | <a href="#">2</a>     | <a href="#">6</a>     | <a href="#">12</a>    | <a href="#">1</a>     | <a href="#">3</a>     | <a href="#">9</a>     | <a href="#">-1.446</a> | <a href="#">.148</a>   |
| <a href="#">CDC CFS Difficulty Concentrating</a> | <a href="#">31</a> | <a href="#">2</a>     | <a href="#">8</a>     | <a href="#">12</a>    | <a href="#">1</a>     | <a href="#">6</a>     | <a href="#">12</a>    | <a href="#">-1.899</a> | <a href="#">.058</a>   |
| <a href="#">CDC CFS Nausea</a>                   | <a href="#">31</a> | <a href="#">0</a>     | <a href="#">1</a>     | <a href="#">6</a>     | <a href="#">0</a>     | <a href="#">2</a>     | <a href="#">6</a>     | <a href="#">-0.855</a> | <a href="#">.392</a>   |
| <a href="#">CDC CFS Abdominal Pain</a>           | <a href="#">31</a> | <a href="#">0</a>     | <a href="#">1</a>     | <a href="#">6</a>     | <a href="#">0</a>     | <a href="#">2</a>     | <a href="#">4</a>     | <a href="#">-0.598</a> | <a href="#">.550</a>   |
| <a href="#">CDC CFS Sinus nasal symptoms</a>     | <a href="#">31</a> | <a href="#">0</a>     | <a href="#">5</a>     | <a href="#">8</a>     | <a href="#">0</a>     | <a href="#">1</a>     | <a href="#">4</a>     | <a href="#">-2.482</a> | <a href="#">.013*</a>  |
| <a href="#">CDC CFS Shortness of breath</a>      | <a href="#">30</a> | <a href="#">0</a>     | <a href="#">2</a>     | <a href="#">6</a>     | <a href="#">0</a>     | <a href="#">1</a>     | <a href="#">4</a>     | <a href="#">-0.976</a> | <a href="#">.329</a>   |
| <a href="#">CDC CFS Sensitivity to light</a>     | <a href="#">31</a> | <a href="#">0</a>     | <a href="#">1</a>     | <a href="#">6</a>     | <a href="#">0</a>     | <a href="#">1</a>     | <a href="#">4</a>     | <a href="#">-0.787</a> | <a href="#">.431</a>   |
| <a href="#">CDC CFS Depression</a>               | <a href="#">31</a> | <a href="#">0</a>     | <a href="#">2</a>     | <a href="#">6</a>     | <a href="#">0</a>     | <a href="#">1</a>     | <a href="#">6</a>     | <a href="#">-1.304</a> | <a href="#">.192</a>   |
| <a href="#">MHLCS Internal</a>                   | <a href="#">31</a> | <a href="#">0.556</a> | <a href="#">0.694</a> | <a href="#">0.861</a> | <a href="#">0.639</a> | <a href="#">0.750</a> | <a href="#">0.889</a> | <a href="#">-1.755</a> | <a href="#">.079</a>   |
| <a href="#">MHLCS Chance</a>                     | <a href="#">31</a> | <a href="#">0.222</a> | <a href="#">0.333</a> | <a href="#">0.361</a> | <a href="#">0.167</a> | <a href="#">0.306</a> | <a href="#">0.417</a> | <a href="#">-0.672</a> | <a href="#">.501</a>   |
| <a href="#">MHLCS Powerful Others</a>            | <a href="#">31</a> | <a href="#">0.333</a> | <a href="#">0.389</a> | <a href="#">0.500</a> | <a href="#">0.333</a> | <a href="#">0.389</a> | <a href="#">0.500</a> | <a href="#">-0.577</a> | <a href="#">.564</a>   |
| <a href="#">MHLCS Doctors</a>                    | <a href="#">31</a> | <a href="#">0.111</a> | <a href="#">0.167</a> | <a href="#">0.222</a> | <a href="#">0.083</a> | <a href="#">0.139</a> | <a href="#">0.500</a> | <a href="#">-1.384</a> | <a href="#">.166</a>   |
| <a href="#">MHLCS Other People</a>               | <a href="#">31</a> | <a href="#">0.167</a> | <a href="#">0.250</a> | <a href="#">0.278</a> | <a href="#">0.194</a> | <a href="#">0.250</a> | <a href="#">0.306</a> | <a href="#">-0.213</a> | <a href="#">.831</a>   |

[\\* significant at .05 level](#)  
[\\*\\* significant at .01 level](#)

\*\*\* significant at .001 level

Table 2. Comparisons across time within the primary outcome measures

|                           |            | Baseline |        |                 |        | 3-month follow-up |        |                 |        | Comparisons |         |
|---------------------------|------------|----------|--------|-----------------|--------|-------------------|--------|-----------------|--------|-------------|---------|
|                           |            | Mean     | SD     | 95% CI for Mean |        | Mean              | SD     | 95% CI for Mean |        | z-statistic | p-value |
|                           |            |          |        | Lower           | Upper  |                   |        | Lower           | Upper  |             |         |
| SF-36                     | Psychology | 49.339   | 22.698 | 42.266          | 56.413 | 59.267            | 30.346 | 41.745          | 76.788 | -2.707      | .007**  |
| Physical Functioning      | Nutrition  | 47.855   | 26.226 | 39.882          | 55.829 | 46.706            | 30.744 | 34.544          | 58.868 | -1.136      | .256    |
|                           | Combined   | 45.299   | 25.479 | 38.206          | 52.393 | 49.288            | 26.403 | 39.604          | 58.973 | -1.850      | .064    |
|                           | Total      | 47.344   | 24.791 | 43.171          | 51.517 | 50.260            | 28.818 | 43.488          | 57.032 | -3.120      | .002**  |
| SF-36                     | Psychology | 7.143    | 15.894 | 2.190           | 12.096 | 46.429            | 39.048 | 23.883          | 68.974 | -2.379      | .017*   |
| Role limitations physical | Nutrition  | 7.574    | 17.500 | 2.254           | 12.895 | 19.444            | 20.016 | 11.526          | 27.363 | -2.907      | .004**  |
|                           | Combined   | 9.774    | 21.051 | 3.914           | 15.635 | 22.742            | 25.161 | 13.513          | 31.971 | -2.225      | .026*   |
|                           | Total      | 8.272    | 18.387 | 5.177           | 11.367 | 26.111            | 28.225 | 19.479          | 32.744 | -4.354      | .001*** |
| SF-36                     | Psychology | 61.548   | 25.614 | 53.566          | 69.530 | 63.929            | 29.786 | 46.731          | 81.127 | -1.196      | .232    |
| Bodily pain               | Nutrition  | 55.625   | 30.242 | 46.434          | 64.819 | 58.889            | 32.943 | 45.857          | 71.921 | -1.800      | .072    |
|                           | Combined   | 53.606   | 27.019 | 46.084          | 61.128 | 58.629            | 27.301 | 48.615          | 68.643 | -1.048      | .294    |
|                           | Total      | 56.667   | 27.683 | 52.007          | 61.327 | 59.757            | 29.649 | 52.790          | 66.724 | -2.240      | .025*   |
| SF-36                     | Psychology | 37.202   | 21.824 | 30.402          | 44.003 | 59.821            | 33.318 | 40.584          | 79.058 | -2.689      | .007**  |
| Social functioning        | Nutrition  | 32.671   | 25.888 | 24.800          | 40.541 | 43.519            | 33.679 | 30.196          | 56.841 | -2.476      | .013*   |
|                           | Combined   | 32.452   | 24.786 | 25.551          | 39.352 | 41.936            | 28.604 | 31.443          | 52.428 | -2.426      | .015*   |
|                           | Total      | 33.967   | 24.212 | 29.892          | 38.043 | 46.007            | 31.805 | 38.533          | 53.481 | -4.504      | .001*** |
| SF-36                     | Psychology | 60.286   | 19.584 | 54.183          | 66.389 | 74.571            | 13.276 | 66.906          | 82.237 | -2.497      | .013*   |

|                                  |            |        |         |        |        |        |        |        |        |        |         |
|----------------------------------|------------|--------|---------|--------|--------|--------|--------|--------|--------|--------|---------|
| General mental health            | Nutrition  | 59.727 | 19.355  | 53.843 | 65.612 | 64.741 | 20.548 | 56.612 | 72.869 | -1.696 | .090    |
|                                  | Combined   | 58.308 | 20.948  | 52.476 | 64.140 | 64.129 | 16.637 | 58.027 | 70.232 | -.524  | -.600   |
|                                  | Total      | 59.362 | 19.911  | 56.011 | 62.714 | 66.389 | 17.897 | 62.183 | 70.594 | -2.665 | .008**  |
| SF-36 Role limitations emotional | Psychology | 55.554 | 46.368  | 41.105 | 70.004 | 76.191 | 33.150 | 57.051 | 95.331 | -.842  | -.400   |
|                                  | Nutrition  | 48.482 | 47.390  | 34.074 | 62.890 | 55.594 | 38.130 | 40.510 | 70.678 | -1.788 | -.074   |
|                                  | Combined   | 47.780 | 43.924  | 35.551 | 60.008 | 67.742 | 32.756 | 55.727 | 79.757 | -2.313 | .021*   |
|                                  | Total      | 50.370 | 45.590  | 42.695 | 58.044 | 64.829 | 35.335 | 56.526 | 73.133 | -3.159 | .002**  |
| SF-36 Vitality Energy or Fatigue | Psychology | 20.714 | 16.139  | 15.685 | 25.743 | 41.071 | 20.586 | 29.186 | 52.957 | -3.066 | .002**  |
|                                  | Nutrition  | 20.114 | 14.5670 | 15.685 | 24.542 | 31.111 | 23.588 | 21.780 | 40.442 | -2.734 | .006**  |
|                                  | Combined   | 19.039 | 17.658  | 14.123 | 23.955 | 27.097 | 19.527 | 19.934 | 34.259 | -1.558 | -.119   |
|                                  | Total      | 19.891 | 16.159  | 17.171 | 22.611 | 31.319 | 21.657 | 26.230 | 36.409 | -4.205 | .001*** |
| SF-36 General health perceptions | Psychology | 37.024 | 17.945  | 31.432 | 42.616 | 45.714 | 21.109 | 33.526 | 57.903 | -2.561 | .010*   |
|                                  | Nutrition  | 28.636 | 15.528  | 23.915 | 33.357 | 36.482 | 18.903 | 29.004 | 43.959 | -2.157 | .031*   |
|                                  | Combined   | 30.962 | 17.575  | 26.069 | 35.854 | 42.097 | 21.632 | 34.162 | 50.032 | -2.423 | .015*   |
|                                  | Total      | 32.065 | 17.286  | 29.156 | 34.975 | 40.694 | 20.561 | 35.863 | 45.526 | -3.996 | .001*** |
| MFI General Fatigue              | Psychology | 15.952 | 2.845   | 15.066 | 16.839 | 13.786 | 4.441  | 11.222 | 16.350 | -2.657 | .008**  |
|                                  | Nutrition  | 16.977 | 2.601   | 16.186 | 17.768 | 14.704 | 4.898  | 12.766 | 16.641 | -2.548 | .011*   |
|                                  | Combined   | 17.327 | 2.588   | 16.607 | 18.047 | 16.645 | 2.811  | 15.614 | 17.676 | -.854  | .393    |
|                                  | Total      | 16.797 | 2.716   | 16.340 | 17.254 | 15.361 | 4.136  | 14.389 | 16.333 | -3.692 | .001*** |
| MFI Physical Fatigue             | Psychology | 15.929 | 3.331   | 14.891 | 16.966 | 13.071 | 4.632  | 10.397 | 15.746 | -2.810 | .005**  |
|                                  | Nutrition  | 16.727 | 3.358   | 15.707 | 17.748 | 14.222 | 4.987  | 12.249 | 16.195 | -2.791 | .005**  |
|                                  | Combined   | 17.615 | 2.823   | 16.830 | 18.401 | 16.484 | 3.395  | 15.239 | 17.729 | -2.364 | .018*   |
|                                  | Total      | 16.819 | 3.211   | 16.278 | 17.359 | 14.972 | 4.453  | 13.926 | 16.019 | -4.591 | .001*** |
| MFI Reduced                      | Psychology | 13.857 | 4.112   | 12.576 | 15.138 | 10.643 | 5.153  | 7.668  | 13.618 | -2.142 | .032*   |
|                                  | Nutrition  | 14.136 | 4.027   | 12.912 | 15.361 | 12.259 | 5.012  | 10.277 | 14.242 | -2.164 | .030*   |

|                |            |        |       |        |        |        |       |        |        |        |         |
|----------------|------------|--------|-------|--------|--------|--------|-------|--------|--------|--------|---------|
| Activity       | Combined   | 14.962 | 3.662 | 13.942 | 15.981 | 14.936 | 3.777 | 13.550 | 16.321 | -.070  | .944    |
|                | Total      | 14.362 | 3.921 | 13.702 | 15.022 | 13.097 | 4.798 | 11.970 | 14.225 | -2.421 | .015*   |
| MFI            | Psychology | 10.357 | 4.287 | 9.021  | 11.693 | 7.286  | 4.214 | 4.853  | 9.719  | -2.131 | .033*   |
| Reduced        | Nutrition  | 10.500 | 3.474 | 9.444  | 11.556 | 8.963  | 3.736 | 7.485  | 10.441 | -1.985 | .047*   |
| Motivation     | Combined   | 11.462 | 3.153 | 10.584 | 12.339 | 10.774 | 3.095 | 9.639  | 11.910 | -1.082 | .279    |
|                | Total      | 10.819 | 3.639 | 10.206 | 11.431 | 9.417  | 3.767 | 8.532  | 10.302 | -2.986 | .003**  |
| MFI            | Psychology | 13.524 | 4.363 | 12.164 | 14.883 | 10.500 | 4.468 | 7.920  | 13.080 | -2.950 | .003*   |
| Mental Fatigue | Nutrition  | 13.682 | 4.328 | 12.366 | 14.998 | 11.926 | 5.334 | 9.816  | 14.036 | -2.082 | .037*   |
|                | Combined   | 13.846 | 4.345 | 12.637 | 15.056 | 12.613 | 3.827 | 11.209 | 14.017 | -1.586 | .113    |
|                | Total      | 13.696 | 4.315 | 12.969 | 14.422 | 11.944 | 4.568 | 10.871 | 13.018 | -3.661 | .001*** |

\*z-statistic for Wilcoxon Signed-Rank Test

Table 3. Comparisons across time within the secondary outcome measures (ME/CFS-specific)

|             |            | Baseline |       |                 |       | 3-month follow-up |       |                 |       | Comparisons |         |
|-------------|------------|----------|-------|-----------------|-------|-------------------|-------|-----------------|-------|-------------|---------|
|             |            | Mean     | SD    | 95% CI for Mean |       | Mean              | SD    | 95% CI for Mean |       | z-statistic | p-value |
|             |            |          |       | Lower           | Upper |                   |       | Lower           | Upper |             |         |
| CDC-CFS     | Psychology | 2.571    | 3.109 | 1.603           | 3.540 | 1.429             | 2.278 | -.114           | 2.744 | -1.365      | .172    |
| Sore Throat | Nutrition  | 3.977    | 3.776 | 2.829           | 5.125 | 1.741             | 2.087 | -.915           | 2.566 | -2.211      | .027*   |
|             | Combined   | 3.202    | 4.494 | 1.951           | 4.454 | 1.904             | 2.821 | -.870           | 2.939 | -.804       | .422    |
|             | Total      | 3.257    | 3.898 | 2.601           | 3.914 | 1.750             | 2.437 | -1.178          | 2.323 | -2.387      | .017*   |
| CDC-CFS     | Psychology | 1.976    | 3.382 | .922            | 3.030 | 1.786             | 3.378 | -.165           | 3.736 | -.341       | .733    |

1  
2  
3  
4  
5  
6  
7  
8  
9  
10  
11  
12  
13  
14  
15  
16  
17  
18  
19  
20  
21  
22  
23  
24  
25  
26  
27  
28  
29  
30  
31  
32  
33  
34  
35  
36  
37  
38  
39  
40  
41  
42  
43  
44  
45  
46  
47  
48  
49

|                              |            |        |       |        |        |        |       |        |        |        |          |
|------------------------------|------------|--------|-------|--------|--------|--------|-------|--------|--------|--------|----------|
| Swollen                      | Nutrition  | 5.561  | 6.491 | 3.587  | 7.534  | 5.000  | 6.760 | 2.326  | 7.674  | -2.212 | .027*    |
| Lymph nodes                  | Combined   | 3.462  | 4.881 | 2.103  | 4.820  | 2.690  | 4.477 | 1.0458 | 4.332  | -.725  | -.468    |
| Glands                       | Total      | 3.679  | 5.250 | 2.795  | 4.563  | 3.380  | 5.385 | 2.115  | 4.646  | -1.684 | -.092    |
| CDC-CFS                      | Psychology | 2.071  | 3.249 | 1.059  | 3.084  | 1.643  | 2.818 | -.016  | 3.270  | -.730  | -.465    |
| Diarrhea                     | Nutrition  | 2.841  | 4.832 | 1.372  | 4.310  | 1.444  | 3.274 | -.149  | 2.740  | -1.649 | -.099    |
|                              | Combined   | 3.135  | 3.773 | 2.084  | 4.185  | 1.631  | 2.483 | -.720  | 2.542  | -1.996 | .046*    |
|                              | Total      | 2.717  | 3.998 | 2.044  | 3.390  | 1.563  | 2.827 | -.899  | 2.228  | -2.481 | -.013*   |
| CDC-CFS                      | Psychology | 13.286 | 6.271 | 11.331 | 15.240 | 11.071 | 6.673 | 7.218  | 14.925 | -1.550 | -.121    |
| Fatigue after exertion       | Nutrition  | 13.722 | 6.450 | 11.761 | 15.682 | 11.815 | 7.217 | 8.960  | 14.670 | -2.209 | -.027*   |
|                              | Combined   | 14.154 | 6.270 | 12.408 | 15.899 | 11.436 | 6.275 | 9.134  | 13.738 | -2.392 | -.017*   |
|                              | Total      | 13.752 | 6.292 | 12.693 | 14.811 | 11.507 | 6.629 | 9.949  | 13.065 | -3.574 | -.001*** |
| CDC-CFS                      | Psychology | 8.286  | 6.747 | 6.183  | 10.388 | 7.429  | 6.892 | 3.450  | 11.408 | -2.145 | -.032*   |
| Muscle Aches or Muscle Pains | Nutrition  | 9.091  | 6.383 | 7.151  | 11.031 | 7.222  | 6.278 | 4.739  | 9.706  | -2.901 | -.004**  |
|                              | Combined   | 8.519  | 6.932 | 6.589  | 10.449 | 6.188  | 5.528 | 4.160  | 8.215  | -1.908 | -.056    |
|                              | Total      | 8.630  | 6.664 | 7.509  | 9.752  | 6.817  | 6.029 | 5.400  | 8.234  | -3.995 | -.001*** |
| CDC-CFS                      | Psychology | 3.476  | 5.334 | 1.814  | 5.138  | 2.786  | 4.458 | -.212  | 5.360  | -1.778 | -.075    |
| Pain In Joints               | Nutrition  | 4.696  | 5.560 | 3.006  | 6.386  | 3.926  | 5.099 | 1.909  | 5.943  | -2.022 | -.043*   |
|                              | Combined   | 5.474  | 6.386 | 3.696  | 7.251  | 3.010  | 4.140 | 1.492  | 4.528  | -1.840 | -.066    |
|                              | Total      | 4.618  | 5.837 | 3.635  | 5.600  | 3.310  | 4.543 | 2.242  | 4.377  | -3.141 | -.002**  |
| CDC-CFS                      | Psychology | 1.238  | 2.516 | -.454  | 2.022  | 1.643  | 4.181 | -.771  | 4.057  | -.135  | -.892    |
| Fever                        | Nutrition  | 1.394  | 2.562 | -.615  | 2.173  | -.630  | 2.041 | -.178  | 1.437  | -1.487 | -.137    |
|                              | Combined   | 1.333  | 3.909 | -.245  | 2.421  | -.378  | -.709 | -.118  | .638   | -1.517 | -.129    |
|                              | Total      | 1.324  | 3.106 | -.801  | 1.846  | -.718  | 2.272 | -.185  | 1.252  | -1.876 | -.061    |
| CDC-CFS                      | Psychology | 3.357  | 4.637 | 1.912  | 4.802  | 2.571  | 4.398 | -.032  | 5.111  | -1.970 | -.049*   |
| Chills                       | Nutrition  | 3.750  | 3.924 | 2.557  | 4.943  | 2.222  | 4.098 | -.601  | 3.843  | -3.401 | -.001*** |

1  
2  
3  
4  
5  
6  
7  
8  
9  
10  
11  
12  
13  
14  
15  
16  
17  
18  
19  
20  
21  
22  
23  
24  
25  
26  
27  
28  
29  
30  
31  
32  
33  
34  
35  
36  
37  
38  
39  
40  
41  
42  
43  
44  
45  
46  
47  
48  
49

|                          |            |        |       |        |        |        |       |       |        |        |         |
|--------------------------|------------|--------|-------|--------|--------|--------|-------|-------|--------|--------|---------|
|                          | Combined   | 3.192  | 4.343 | 1.983  | 4.402  | 1.908  | 2.797 | .882  | 2.934  | -2.049 | .040*   |
|                          | Total      | 3.420  | 4.283 | 2.699  | 4.141  | 2.155  | 3.614 | 1.306 | 3.004  | -4.206 | .001*** |
| CDC-CFS                  | Psychology | 12.905 | 6.792 | 10.788 | 15.021 | 10.643 | 6.698 | 6.776 | 14.510 | -.802  | .422    |
| UnrefreshingSleep        | Nutrition  | 12.250 | 7.088 | 10.095 | 14.405 | 9.444  | 7.738 | 6.384 | 12.505 | -1.421 | .155    |
|                          | Combined   | 12.154 | 7.147 | 10.164 | 14.143 | 10.161 | 7.959 | 7.242 | 13.080 | -1.513 | .130    |
|                          | Total      | 12.413 | 6.978 | 11.238 | 13.588 | 9.986  | 7.557 | 8.210 | 11.762 | -2.295 | .022*   |
| CDC-CFS                  | Psychology | 9.286  | 7.658 | 6.899  | 11.672 | 5.286  | 4.921 | 2.444 | 8.127  | -1.738 | .082    |
| Sleeping Problems        | Nutrition  | 8.614  | 7.317 | 6.389  | 10.838 | 9.482  | 9.200 | 5.842 | 13.121 | -.190  | .849    |
|                          | Combined   | 8.904  | 7.681 | 6.766  | 11.042 | 6.529  | 6.749 | 4.053 | 9.004  | -1.794 | .073    |
|                          | Total      | 8.928  | 7.509 | 7.664  | 10.192 | 7.394  | 7.585 | 5.612 | 9.177  | -1.983 | .047*   |
| CDC-CFS                  | Psychology | 5.262  | 5.548 | 3.533  | 6.991  | 4.357  | 3.411 | 2.388 | 6.326  | -1.200 | .230    |
| Headaches                | Nutrition  | 7.646  | 7.040 | 5.506  | 9.786  | 5.185  | 6.294 | 2.695 | 7.675  | -2.084 | .037*   |
|                          | Combined   | 6.346  | 5.857 | 4.715  | 7.977  | 4.050  | 3.527 | 2.756 | 5.343  | -2.807 | .005**  |
|                          | Total      | 6.431  | 6.200 | 5.387  | 7.474  | 4.535  | 4.708 | 3.429 | 5.642  | -3.000 | .003**  |
| CDC-CFS                  | Psychology | 6.333  | 4.996 | 4.777  | 7.890  | 3.500  | 3.995 | 1.193 | 5.807  | -1.965 | .049*   |
| Memory Problems          | Nutrition  | 9.409  | 7.183 | 7.225  | 11.593 | 8.667  | 7.681 | 5.628 | 11.705 | -.338  | .735    |
|                          | Combined   | 8.173  | 7.610 | 6.055  | 10.292 | 6.148  | 4.905 | 4.349 | 7.947  | -1.446 | .148    |
|                          | Total      | 8.007  | 6.835 | 6.857  | 9.158  | 6.578  | 6.189 | 5.123 | 8.032  | -2.053 | .040*   |
| CDC-CFS                  | Psychology | 8.500  | 6.094 | 6.601  | 10.399 | 5.143  | 5.559 | 1.933 | 8.353  | -2.809 | .005**  |
| Difficulty Concentrating | Nutrition  | 9.822  | 7.641 | 7.499  | 12.145 | 7.778  | 6.941 | 5.032 | 10.524 | -1.196 | .232    |
|                          | Combined   | 9.135  | 6.942 | 7.202  | 11.067 | 6.507  | 4.843 | 4.731 | 8.283  | -1.899 | .058    |
|                          | Total      | 9.161  | 6.903 | 7.999  | 10.323 | 6.718  | 5.844 | 5.345 | 8.092  | -3.440 | .001*** |
| CDC-CFS                  | Psychology | 3.476  | 4.845 | 1.966  | 4.986  | 2.286  | 2.946 | .585  | 3.987  | -.213  | .832    |
| Nausea                   | Nutrition  | 4.769  | 5.135 | 3.208  | 6.330  | 3.407  | 5.746 | 1.134 | 5.681  | -1.686 | .092    |
|                          | Combined   | 3.327  | 4.902 | 1.962  | 4.692  | 3.458  | 3.585 | 2.144 | 4.773  | -.855  | .392    |



1  
2  
3  
4  
5  
6  
7  
8  
9  
10  
11  
12  
13  
14  
15  
16  
17  
18  
19  
20  
21  
22  
23  
24  
25  
26  
27  
28  
29  
30  
31  
32  
33  
34  
35  
36  
37  
38  
39  
40  
41  
42  
43  
44  
45  
46  
47  
48  
49

|                |            |       |       |       |       |       |       |       |       |        |         |
|----------------|------------|-------|-------|-------|-------|-------|-------|-------|-------|--------|---------|
|                | Total      | 3.832 | 4.966 | 2.996 | 4.668 | 3.211 | 4.396 | 2.178 | 4.244 | -584   | -559    |
| CDC-CFS        | Psychology | 2.548 | 3.270 | 1.529 | 3.567 | 2.786 | 4.003 | -474  | 5.097 | -343   | -732    |
| Abdominal      | Nutrition  | 5.064 | 5.165 | 3.493 | 6.634 | 3.593 | 3.905 | 2.048 | 5.137 | -1.968 | .049*   |
| Pain           | Combined   | 3.750 | 4.635 | 2.460 | 5.041 | 2.548 | 2.791 | 1.524 | 3.572 | -598   | -550    |
|                | Total      | 3.803 | 4.535 | 3.040 | 4.566 | 2.986 | 3.470 | 2.171 | 3.801 | -1.727 | -.084   |
| CDC-CFS        | Psychology | 3.524 | 4.702 | 2.059 | 4.989 | 2.357 | 2.437 | .950  | 3.764 | -724   | -469    |
| Sinus-Nasal    | Nutrition  | 5.469 | 6.476 | 3.500 | 7.438 | 4.889 | 6.104 | 2.474 | 7.304 | -1.400 | -.162   |
| Symptoms       | Combined   | 4.789 | 6.304 | 3.034 | 6.544 | 3.804 | 6.710 | 1.343 | 6.266 | -2.482 | .013*   |
|                | Total      | 4.620 | 5.931 | 3.622 | 5.619 | 3.930 | 5.882 | 2.547 | 5.312 | -2.971 | -.003** |
| CDC-CFS        | Psychology | 3.000 | 4.191 | 1.694 | 4.306 | 1.571 | 2.209 | -.296 | 2.847 | -1.556 | -.120   |
| Shortness-Of   | Nutrition  | 3.285 | 4.090 | 2.026 | 4.543 | 2.407 | 4.060 | -.801 | 4.013 | -1.849 | -.064   |
| Breath         | Combined   | 3.392 | 4.788 | 2.046 | 4.739 | 2.526 | 3.631 | 1.194 | 3.858 | -.976  | -.329   |
|                | Total      | 3.237 | 4.365 | 2.497 | 3.977 | 2.296 | 3.554 | 1.461 | 3.131 | -2.538 | -.011*  |
| CDC-CFS        | Psychology | 3.429 | 5.347 | 1.762 | 5.095 | 1.214 | 2.517 | -.239 | 2.668 | -1.973 | .049*   |
| Sensitivity-To | Nutrition  | 5.031 | 6.097 | 3.177 | 6.884 | 4.111 | 6.198 | 1.659 | 6.563 | -2.136 | .033*   |
| Light          | Combined   | 4.481 | 6.360 | 2.710 | 6.251 | 3.297 | 5.557 | 1.259 | 5.335 | -.787  | -.431   |
|                | Total      | 4.336 | 5.975 | 3.330 | 5.342 | 3.197 | 5.419 | 1.924 | 4.471 | -2.542 | -.011*  |
| CDC-CFS        | Psychology | 3.952 | 3.938 | 2.725 | 5.180 | 1.571 | 3.228 | -.292 | 3.435 | -1.614 | -.106   |
| Depression     | Nutrition  | 4.477 | 5.450 | 2.821 | 6.134 | 3.333 | 4.883 | 1.402 | 5.265 | -1.584 | -.113   |
|                | Combined   | 5.077 | 5.950 | 3.420 | 6.734 | 2.766 | 3.324 | 1.547 | 3.985 | -1.304 | -.192   |
|                | Total      | 4.544 | 5.230 | 3.663 | 5.424 | 2.747 | 3.964 | 1.815 | 3.678 | -2.297 | -.022*  |

\*z-statistic for Wilcoxon Signed-Rank Test

Table 4. Comparisons across time within the secondary outcome measures (psychological)

1  
2  
3  
4  
5  
6  
7  
8  
9  
10  
11  
12  
13  
14  
15  
16  
17  
18  
19  
20  
21  
22  
23  
24  
25  
26  
27  
28  
29  
30  
31  
32  
33  
34  
35  
36  
37  
38  
39  
40  
41  
42  
43  
44  
45  
46  
47  
48  
49

|              |            | Baseline |        |                 |        | 3-month follow-up |        |                 |        | Comparisons |         |
|--------------|------------|----------|--------|-----------------|--------|-------------------|--------|-----------------|--------|-------------|---------|
|              |            | Mean     | SD     | 95% CI for Mean |        | Mean              | SD     | 95% CI for Mean |        | z-statistic | p-value |
|              |            |          |        | Lower           | Upper  |                   |        | Lower           | Upper  |             |         |
| MHLCS        | Psychology | -.677    | .159   | -.627           | -.726  | -.821             | .251   | -.676           | -.966  | -2.983      | .003**  |
| Internal     | Nutrition  | -.622    | .177   | -.568           | -.675  | 1.193             | 2.969  | -.019           | 2.368  | -.687       | .492    |
|              | Combined   | -.662    | .174   | -.613           | -.710  | -.779             | .318   | -.662           | -.896  | -1.755      | .079    |
|              | Total      | -.653    | .171   | -.624           | -.682  | -.942             | 1.822  | -.514           | 1.371  | -2.962      | .003**  |
| MHLCS        | Psychology | -.368    | .156   | -.320           | -.417  | -.351             | .152   | -.263           | -.439  | -2.594      | .009**  |
| Chance       | Nutrition  | -.340    | .133   | -.299           | -.380  | -.911             | 3.020  | -.284           | 2.105  | -.143       | .886    |
|              | Combined   | -.354    | .155   | -.311           | -.397  | -.314             | .133   | -.265           | -.363  | -.672       | .501    |
|              | Total      | -.354    | .148   | -.329           | -.379  | -.545             | 1.853  | -.109           | .980   | -1.552      | .121    |
| MHLCS        | Psychology | -.404    | .134   | -.362           | -.446  | -.441             | .315   | -.259           | -.624  | -.000       | 1.000   |
| Powerful     | Nutrition  | -.418    | .141   | -.374           | -.460  | -.804             | 2.244  | -.084           | 1.691  | -1.843      | .065    |
| Others       | Combined   | -.407    | .101   | -.379           | -.436  | -.434             | .279   | -.331           | -.536  | -.577       | .564    |
|              | Total      | -.409    | .124   | -.388           | -.430  | -.574             | 1.3880 | -.248           | .900   | -1.601      | .109    |
| MHLCS        | Psychology | -.169    | .082   | -.143           | -.194  | -.131             | .093   | -.077           | -.185  | -1.122      | .262    |
| Doctors      | Nutrition  | -.171    | .089   | -.144           | -.197  | -.657             | 2.668  | -.398           | 1.713  | -1.686      | .092    |
|              | Combined   | -.191    | .147   | -.150           | -.232  | -.153             | .070   | -.128           | -.179  | -1.384      | .166    |
|              | Total      | -.178    | .112   | -.159           | -.196  | -.338             | 1.635  | -.0462          | .722   | -2.381      | .017*   |
| MHLCS        | Psychology | -.235    | .075   | -.212           | -.259  | -.268             | .189   | -.159           | -.377  | -.118       | .906    |
| Other People | Nutrition  | -.264    | .129   | -.225           | -.304  | -.739             | 2.652  | -.311           | 1.788  | -1.697      | .090    |
|              | Combined   | -.245    | .074   | -.224           | -.265  | -.252             | .118   | -.209           | -.295  | -.213       | .831    |
|              | Total      | -.248    | .095   | -.232           | -.264  | -.438             | 1.626  | -.055           | .820   | -1.186      | .236    |
| CDC-CFS      | Psychology | 94.381   | 16.836 | 89.134          | 99.628 | 78.571            | 18.434 | 67.928          | 89.215 | -3.111      | .002**  |

1  
2  
3  
4  
5  
6  
7  
8  
9  
10  
11  
12  
13  
14  
15  
16  
17  
18  
19  
20  
21  
22  
23  
24  
25  
26  
27  
28  
29  
30  
31  
32  
33  
34  
35  
36  
37  
38  
39  
40  
41  
42  
43  
44  
45  
46  
47  
48  
49

|              |           |        |        |        |         |        |        |        |        |        |         |
|--------------|-----------|--------|--------|--------|---------|--------|--------|--------|--------|--------|---------|
| Maladaptive  | Nutrition | 96.386 | 21.946 | 89.714 | 103.059 | 85.259 | 27.665 | 74.315 | 96.203 | -3.443 | .001*** |
| Stress Index | Combined  | 98.269 | 19.165 | 92.934 | 103.605 | 87.484 | 22.965 | 79.060 | 95.908 | -2.215 | .027*   |
| Scale Score  | Total     | 96.486 | 19.373 | 93.225 | 99.747  | 84.917 | 24.004 | 79.276 | 90.557 | -5.123 | .001*** |

\*z-statistic for Wilcoxon Signed-Rank Test

For peer review only

**STROBE 2007 (v4) checklist of items to be included in reports of observational studies in epidemiology\***  
**Checklist for cohort, case-control, and cross-sectional studies (combined)**

| Section/Topic             | Item # | Recommendation                                                                                                                                                                                                                                                                                                                                                                                                                                                         | Reported on page # |
|---------------------------|--------|------------------------------------------------------------------------------------------------------------------------------------------------------------------------------------------------------------------------------------------------------------------------------------------------------------------------------------------------------------------------------------------------------------------------------------------------------------------------|--------------------|
| Title and abstract        | 1      | (a) Indicate the study's design with a commonly used term in the title or the abstract                                                                                                                                                                                                                                                                                                                                                                                 | 1-2                |
|                           |        | (b) Provide in the abstract an informative and balanced summary of what was done and what was found                                                                                                                                                                                                                                                                                                                                                                    | 1-2                |
| <b>Introduction</b>       |        |                                                                                                                                                                                                                                                                                                                                                                                                                                                                        |                    |
| Background/rationale      | 2      | Explain the scientific background and rationale for the investigation being reported                                                                                                                                                                                                                                                                                                                                                                                   | 3-6                |
| Objectives                | 3      | State specific objectives, including any pre-specified hypotheses                                                                                                                                                                                                                                                                                                                                                                                                      | 6                  |
| <b>Methods</b>            |        |                                                                                                                                                                                                                                                                                                                                                                                                                                                                        |                    |
| Study design              | 4      | Present key elements of study design early in the paper                                                                                                                                                                                                                                                                                                                                                                                                                | 2                  |
| Setting                   | 5      | Describe the setting, locations, and relevant dates, including periods of recruitment, exposure, follow-up, and data collection                                                                                                                                                                                                                                                                                                                                        | 7-8                |
| Participants              | 6      | (a) <i>Cohort study</i> —Give the eligibility criteria, and the sources and methods of selection of participants. Describe methods of follow-up<br><i>Case-control study</i> —Give the eligibility criteria, and the sources and methods of case ascertainment and control selection. Give the rationale for the choice of cases and controls<br><i>Cross-sectional study</i> —Give the eligibility criteria, and the sources and methods of selection of participants | 7-8                |
|                           |        | (b) <i>Cohort study</i> —For matched studies, give matching criteria and number of exposed and unexposed<br><i>Case-control study</i> —For matched studies, give matching criteria and the number of controls per case                                                                                                                                                                                                                                                 |                    |
| Variables                 | 7      | Clearly define all outcomes, exposures, predictors, potential confounders, and effect modifiers. Give diagnostic criteria, if applicable                                                                                                                                                                                                                                                                                                                               | 10-12              |
| Data sources/ measurement | 8*     | For each variable of interest, give sources of data and details of methods of assessment (measurement). Describe comparability of assessment methods if there is more than one group                                                                                                                                                                                                                                                                                   | 10-12              |
| Bias                      | 9      | Describe any efforts to address potential sources of bias                                                                                                                                                                                                                                                                                                                                                                                                              | 20-21              |
| Study size                | 10     | Explain how the study size was arrived at                                                                                                                                                                                                                                                                                                                                                                                                                              | 13-14              |
| Quantitative variables    | 11     | Explain how quantitative variables were handled in the analyses. If applicable, describe which groupings were chosen and why                                                                                                                                                                                                                                                                                                                                           | 12-13              |
| Statistical methods       | 12     | (a) Describe all statistical methods, including those used to control for confounding                                                                                                                                                                                                                                                                                                                                                                                  | 12-13              |
|                           |        | (b) Describe any methods used to examine subgroups and interactions                                                                                                                                                                                                                                                                                                                                                                                                    | 12-13              |
|                           |        | (c) Explain how missing data were addressed                                                                                                                                                                                                                                                                                                                                                                                                                            | 12                 |
|                           |        | (d) <i>Cohort study</i> —If applicable, explain how loss to follow-up was addressed<br><i>Case-control study</i> —If applicable, explain how matching of cases and controls was addressed                                                                                                                                                                                                                                                                              | 12 & 14            |

|                          |     |                                                                                                                                                                                                                                                                                                                                                                                                               |                      |
|--------------------------|-----|---------------------------------------------------------------------------------------------------------------------------------------------------------------------------------------------------------------------------------------------------------------------------------------------------------------------------------------------------------------------------------------------------------------|----------------------|
|                          |     | <i>Cross-sectional study</i> —If applicable, describe analytical methods taking account of sampling strategy                                                                                                                                                                                                                                                                                                  |                      |
|                          |     | (e) Describe any sensitivity analyses                                                                                                                                                                                                                                                                                                                                                                         |                      |
| <b>Results</b>           |     |                                                                                                                                                                                                                                                                                                                                                                                                               |                      |
| Participants             | 13* | (a) Report numbers of individuals at each stage of study—eg numbers potentially eligible, examined for eligibility, confirmed eligible, included in the study, completing follow-up, and analysed<br>(b) Give reasons for non-participation at each stage<br>(c) Consider use of a flow diagram                                                                                                               | 14-15                |
| Descriptive data         | 14* | (a) Give characteristics of study participants (eg demographic, clinical, social) and information on exposures and potential confounders<br>(b) Indicate number of participants with missing data for each variable of interest<br>(c) <i>Cohort study</i> —Summarise follow-up time (eg, average and total amount)                                                                                           | 13-14 & Table 1<br>8 |
| Outcome data             | 15* | <i>Cohort study</i> —Report numbers of outcome events or summary measures over time<br><i>Case-control study</i> —Report numbers in each exposure category, or summary measures of exposure<br><i>Cross-sectional study</i> —Report numbers of outcome events or summary measures                                                                                                                             | 15-17                |
| Main results             | 16  | (a) Give unadjusted estimates and, if applicable, confounder-adjusted estimates and their precision (eg, 95% confidence interval). Make clear which confounders were adjusted for and why they were included<br>(b) Report category boundaries when continuous variables were categorized<br>(c) If relevant, consider translating estimates of relative risk into absolute risk for a meaningful time period | Tables 2-9 (IQR)     |
| Other analyses           | 17  | Report other analyses done—eg analyses of subgroups and interactions, and sensitivity analyses                                                                                                                                                                                                                                                                                                                |                      |
| <b>Discussion</b>        |     |                                                                                                                                                                                                                                                                                                                                                                                                               |                      |
| Key results              | 18  | Summarise key results with reference to study objectives                                                                                                                                                                                                                                                                                                                                                      | 19-20                |
| Limitations              | 19  | Discuss limitations of the study, taking into account sources of potential bias or imprecision. Discuss both direction and magnitude of any potential bias                                                                                                                                                                                                                                                    | 20-21                |
| Interpretation           | 20  | Give a cautious overall interpretation of results considering objectives, limitations, multiplicity of analyses, results from similar studies, and other relevant evidence                                                                                                                                                                                                                                    | 20                   |
| Generalisability         | 21  | Discuss the generalisability (external validity) of the study results                                                                                                                                                                                                                                                                                                                                         | 20-21                |
| <b>Other information</b> |     |                                                                                                                                                                                                                                                                                                                                                                                                               |                      |
| Funding                  | 22  | Give the source of funding and the role of the funders for the present study and, if applicable, for the original study on which the present article is based                                                                                                                                                                                                                                                 | 21                   |

\*Give information separately for cases and controls in case-control studies and, if applicable, for exposed and unexposed groups in cohort and cross-sectional studies.

**Note:** An Explanation and Elaboration article discusses each checklist item and gives methodological background and published examples of transparent reporting. The STROBE checklist is best used in conjunction with this article (freely available on the Web sites of PLoS Medicine at <http://www.plosmedicine.org/>, Annals of Internal Medicine at <http://www.annals.org/>, and Epidemiology at <http://www.epidem.com/>). Information on the STROBE Initiative is available at [www.strobe-statement.org](http://www.strobe-statement.org).
